# Supplementary material for: (Imidazol-2-ylidene) → S coordination interactions and its modulation upon S-oxidation
Source: Royal Society of Chemistry journal article supplement (doi:10.1039/d4dt02286f), 2024-01-01
Supplement: d4dt02286f1.pdf [file d4dt02286f1.pdf]

Supporting information

## **(Imidazol-2-ylidene)→S Coordination Interaction and its Modulation Upon S-Oxidation**

Joy Mukhopadhyay,<sup>[a]</sup> Subash C. Sahoo<sup>[b]</sup> and Prasad V. Bharatam<sup>\*[a]</sup>

|                                  |         |
|----------------------------------|---------|
| General information.....         | 2       |
| Experimental Section.....        | 2-19    |
| Spectra .....                    | 20-135  |
| X-ray Crystallographic data..... | 136-143 |
| Computational details .....      | 144-190 |

## 1. General Information

The reagents and chemicals required for the study were procured without further purification unless otherwise mentioned. The progress of the reaction was monitored by Thin Layer Chromatography (TLC) performed on silica gel aluminium plates using UV light.  $^1\text{H}$  NMR and  $^{13}\text{C}$  NMR spectra were recorded at 600 MHz and 151 MHz respectively, with TMS as an internal standard using Jeol 600 (Model no. JNM-ECZ600R/S1).  $^{19}\text{F}$  NMR was recorded at 202.4 MHz with TMS as an internal standard. The  $^1\text{H}$  NMR and  $^{13}\text{C}$  NMR spectra were recorded using  $\text{DMSO-}d_6$  at 2.50 ppm ( $^1\text{H}$  NMR) and 39.51 ppm ( $^{13}\text{C}$  NMR) and  $\text{CDCl}_3$  at 7.25 ppm ( $^1\text{H}$  NMR) and 77.31 ppm ( $^{13}\text{C}$  NMR) and for a few compounds  $\text{CD}_3\text{OD}$   $\delta = 3.34, 4.87$  ppm ( $^1\text{H}$  NMR) and 49.3 ( $^{13}\text{C}$  NMR) and  $(\text{CD}_3)_2\text{CO}$   $\delta = 2.06, 3.08$  ppm ( $^1\text{H}$  NMR) and 20.7, 206.07 ( $^{13}\text{C}$  NMR) respectively. Chemical shift ( $\delta$ ) is reported in parts per million (ppm). Coupling constants ( $J$ ) were reported in Hertz (Hz). The abbreviations used to characterize the signals are as follows: s = singlet, m = multiplet, d = doublet, br. s. = broad singlet, dd = doublet of doublet, t = triplet, =quartet, m=multiplet, quin=quintuplet, sext=sextet, sep=septet, br=broad, dd=double-doublet, ddd=double-double-doublet, td=triple-doublet. High resolution mass spectrums were recorded using ESI-TOF method (Model no. Agilent 6546). IR spectrums were recorded using IR spectrophotometer.

## 2. Experimental Section

### Experimental procedures for the compounds (1a-8a)

Preparation of the compound **1a**: 2-Chloro-4-Fluoro benzyl bromide (266 mgs, 1.2 mmol, 1 equiv.) was added to the magnetically stirred mixture of 1-methyl-1H-imidazole-2-thiol (114 mgs, 1 mmol, 1 equiv) and base  $\text{LiOH}\cdot\text{H}_2\text{O}$  (21 mgs, 1 mmol, 0.5 equiv) in a biphasic solvent media of (THF/ $\text{H}_2\text{O}$ ), and reaction was continued for at the room temperature for 0.5 hr. Reaction progress was monitored through thin layer chromatography (TLC). Upon of the reaction completion, the product was diluted with EtOAc and thoroughly washed with water (3\*10 ml). The organic layer was separated through work-up and dried over ( $\text{Na}_2\text{SO}_4$ ). Without any additional purification, the volatile components were extracted in vacuo, yielding a pure product in the form of greyish liquid.

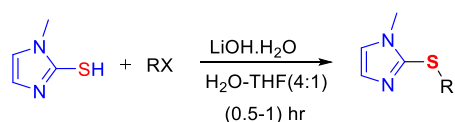

Scheme S1: Synthesis of sulfide derivatives (**1a-8a**)

## Characterization data of 1a-8a

### 2-((2-chloro-4-fluorobenzyl)thio)-1-methyl-1H-imidazole (1a)

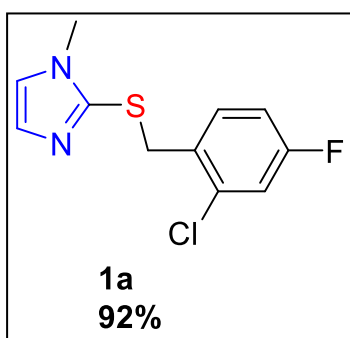

The title compound was isolated by (EtOAc/H<sub>2</sub>O) work up; Yield: 92 % (235 mgs), Yellowish liquid, <sup>1</sup>H NMR (600MHz, CDCl<sub>3</sub>) δ 7.15 – 7.08 (m, 2H), 6.99 (dd, *J* = 8.6, 6.1 Hz, 1H), 6.88 (s, 1H), 6.80 (td, *J* = 8.3, 2.6 Hz, 1H), 4.23 (s, 1H), 3.32 (s, 2H); <sup>13</sup>C{<sup>1</sup>H} NMR (151 MHz, CDCl<sub>3</sub>): 165.34 (d, <sup>1</sup>*J*<sub>C-F</sub> = 250.1 Hz), 139.99, 134.64 (d, <sup>3</sup>*J*<sub>C-F</sub> = 10.3 Hz), 131.65 (d, <sup>3</sup>*J*<sub>C-F</sub> = 9.0 Hz), 129.86, 122.64, 116.98 (d, <sup>2</sup>*J*<sub>C-F</sub> = 24.7 Hz), 113.96 (d, <sup>2</sup>*J*<sub>C-F</sub> = 20.9 Hz), 36.97, 33.11.

### 2-(benzylthio)-1-methyl-1H-imidazole (2a)

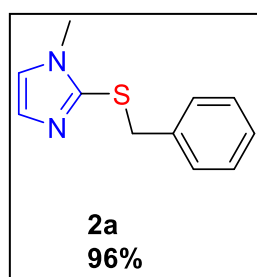

The title compound was isolated by (EtOAc/H<sub>2</sub>O) work up; Yield: 96 % (195 mgs), Yellowish liquid, <sup>1</sup>H NMR (600MHz, CDCl<sub>3</sub>) δ 7.22-7.20 (m, 3H), 7.11-7.09 (m, 3H), 6.83 (s, 1H), 4.13 (s, 2H), 3.21 (s, 3H); <sup>13</sup>C{<sup>1</sup>H} NMR (151 MHz, CDCl<sub>3</sub>): δ 140.58, 137.99, 129.86, 128.85, 128.59, 127.45, 122.51, 40.23, 33.13.

### 2-((4-bromobenzyl)thio)-1-methyl-1H-imidazole (3a)

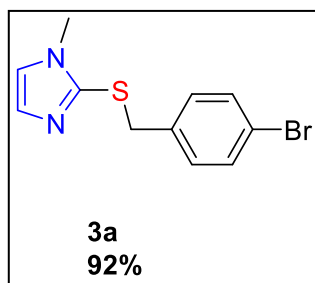

The title compound was isolated by (EtOAc/H<sub>2</sub>O) work up; Yield: 92 % (258 mg), Yellowish liquid, <sup>1</sup>H NMR (600MHz, CDCl<sub>3</sub>) δ 7.36 (d, *J* = 8.4 Hz, 2H), 7.11 (s, 1H), 7.01 (d, *J* = 8.4 Hz, 2H), 6.87 (s, 1H), 4.11 (s, 2H), 3.30 (s, 3H); <sup>13</sup>C{<sup>1</sup>H} NMR (151 MHz, CDCl<sub>3</sub>): δ 140.25, 137.22, 131.73, 130.58, 129.97, 122.67, 121.44, 39.39, 33.28.

### 2-((4-bromo-2-fluorobenzyl)thio)-1-methyl-1H-imidazole (4a)

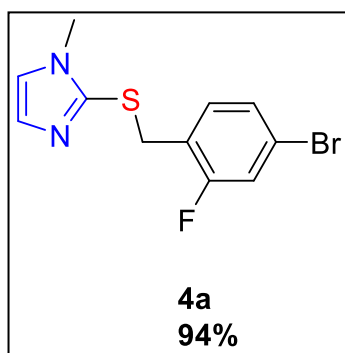

The title compound was isolated by (EtOAc/H<sub>2</sub>O) work up; Yield: 94% (281 mg), Yellowish liquid, <sup>1</sup>H NMR (600MHz, CDCl<sub>3</sub>): δ 7.21 (dd, *J* = 9.3, 1.8 Hz, 1H), 7.16 – 7.09 (m, 2H), 6.94 – 6.88 (t, 2H), 4.14 (s, 2H), 3.36 (s, 3H); <sup>13</sup>C{<sup>1</sup>H} NMR (151 MHz, CDCl<sub>3</sub>): δ 160.50 (d, <sup>1</sup>*J*<sub>C-F</sub> = 252.6 Hz), 140.00, 131.89, 129.97, 127.43, 124.62 (d, <sup>2</sup>*J*<sub>C-F</sub> = 14.9 Hz), 122.80, 121.69 (d, <sup>3</sup>*J*<sub>C-F</sub> = 9.5 Hz), 119.19 (d, <sup>2</sup>*J*<sub>C-F</sub> = 24.8 Hz), 33.26, 32.58.

### 1-methyl-2-((4-(trifluoromethoxy)benzyl)thio)-1H-imidazole (5a)

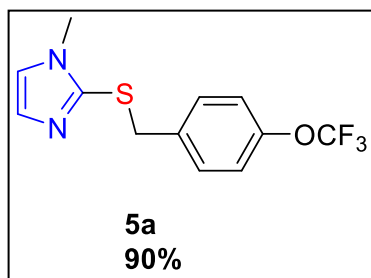

The title compound was isolated by (EtOAc/H<sub>2</sub>O) work up; Yield: 90% (259 mgs), Yellowish liquid, NMR (600MHz, CDCl<sub>3</sub>)  $\delta$  7.19 – 7.15 (m, 2H), 7.13 (s, 1H), 7.10 (d,  $J$  = 8.2 Hz, 2H), 6.88 (s, 1H), 4.18 (s, 2H), 3.29 (s, 3H); <sup>13</sup>C{<sup>1</sup>H} NMR (151 MHz, CDCl<sub>3</sub>):  $\delta$  148.47, 140.08, 136.80, 130.17, 129.72, 122.56, 121.03, 39.08, 33.08.

### 2-((4-(tert-butyl)benzyl)thio)-1-methyl-1H-imidazole (6a)

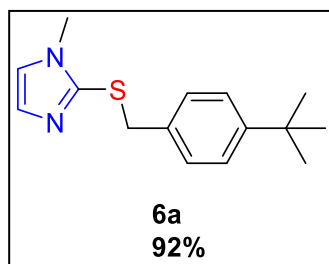

The title compound was isolated by (EtOAc/H<sub>2</sub>O) work-up; Yield: 92 % (239 mgs), Yellowish liquid, <sup>1</sup>H NMR (600MHz, CDCl<sub>3</sub>)  $\delta$  7.27 (d,  $J$  = 8.2 Hz, 2H), 7.11 (s, 1H), 7.08 – 7.05 (m, 2H), 6.87 (s, 1H), 4.15 (s, 2H), 3.25 (s, 3H); <sup>13</sup>C{<sup>1</sup>H} NMR (151 MHz, CDCl<sub>3</sub>):  $\delta$  149.48, 139.80, 133.58, 128.65, 127.44, 124.40, 121.32, 38.64, 33.48, 31.98, 30.30.

### 1-methyl-2-((3-(trifluoromethyl)benzyl)thio)-1H-imidazole (7a)

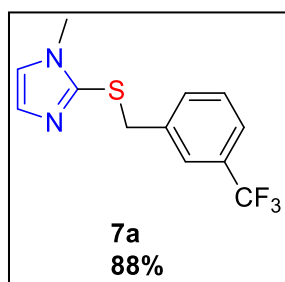

The title compound was isolated by (EtOAc/H<sub>2</sub>O) work up; Yield: 88% (239 mgs), Yellowish liquid, <sup>1</sup>H NMR (600MHz, CDCl<sub>3</sub>)  $\delta$  7.49 (t,  $J$  = 2.0 Hz, 3H), 7.47 (s, 1H), 7.45 – 7.40 (m, 2H), 4.34 (s, 2H), 3.69 (s, 3H); <sup>13</sup>C{<sup>1</sup>H} NMR (151 MHz, CDCl<sub>3</sub>):  $\delta$  142.36, 138.65 (q,  $J$  = 2.6 Hz), 131.68 (d,  $J$  = 32.2 Hz), 130.26, 129.66 (d,  $J$  = 18 Hz), 128.82, 127.22 (t,  $J$  = 5 Hz), 125.40, 123.89 (t,  $J$  = 7 Hz), 122.88, 36.67, 33.47.

### 1-methyl-2-((4-nitrobenzyl)thio)-1H-imidazole- (8a)

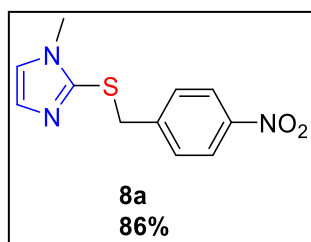

The title compound was isolated by (EtOAc/H<sub>2</sub>O) work up; Yield: 86% (215 mgs), Brownish liquid, <sup>1</sup>H NMR (600 MHz, CDCl<sub>3</sub>)  $\delta$  8.10 (d,  $J$  = 8.7 Hz, 2H), 7.34 (d,  $J$  = 8.7 Hz, 2H), 7.11 (s, 1H), 6.89 (s, 1H), 4.26 (s, 2H), 3.35 (s, 3H); <sup>13</sup>C{<sup>1</sup>H} NMR (151 MHz, CDCl<sub>3</sub>):  $\delta$  147.20, 145.89, 139.59, 129.96, 129.68, 123.80, 122.83, 38.80, 33.25.

## Experimental procedures for the compounds (1b-8b)

2-((2-chloro-4-fluorobenzyl)thio)-1-methyl-1H-imidazole (**1a**) (256mgs, 1mmol, 1 equiv.) was added in ice cooled Dichloromethane (DCM). The reaction mixture was stirred for 10 minutes, and after that urea-H<sub>2</sub>O<sub>2</sub> (118 mgs, 1.25 mmol, 1.25 equiv) was added dropwise. The reaction was continued for 8 hr. at room temperature. Reaction progress was monitored by TLC. Upon completion, the reaction was quenched with saturated aqueous solution of Sodium Bicarbonate (NaHCO<sub>3</sub>) and extracted with DCM (3\*10 ml). The combined organic layer was dried over (Na<sub>2</sub>SO<sub>4</sub>), concentrated and purified by column chromatography to provide the pure product as white solid.

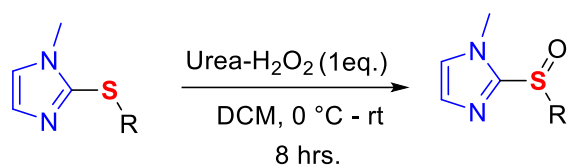

Scheme S2: Synthesis of sulfide derivatives (**1b-8b**)

**Table S1. Screening of oxidation process**

| S.NO. | Oxidising agents                     | Solvent               | (equiv.) | Temp.     | Time (h) | Isolated yield (%) |
|-------|--------------------------------------|-----------------------|----------|-----------|----------|--------------------|
| 1     | Urea-H <sub>2</sub> O <sub>2</sub>   | DCM                   | 1        | 0 °C - rt | 8 hrs.   | 85 %               |
| 2     | Urea-H <sub>2</sub> O <sub>2</sub>   | DCE                   | 1        | 0 °C - rt | 8 hrs.   | 82 %               |
| 3     | Urea-H <sub>2</sub> O <sub>2</sub>   | DCM                   | 1        | Rt        | 14 hrs.  | 65 %               |
| 4     | Urea-H <sub>2</sub> O <sub>2</sub>   | DCM                   | 1        | 60 °C     | 8 hrs.   | 60%                |
| 5     | Urea-H <sub>2</sub> O <sub>2</sub>   | DCM                   | 1.5      | Rt        | 8 hrs.   | 54%                |
| 6     | H <sub>2</sub> O <sub>2</sub> (30 %) | DCM                   | 1        | 0 °C - rt | 8 hrs.   | 75 %               |
| 7     | TBHP                                 | DCM                   | 1        | 0 °C - rt | 8hrs     | 60 %               |
| 8     | mCPBA                                | DCM                   | 1        | 0 °C - rt | 8 hrs.   | 72 %               |
| 9     | mCPBA                                | CAN                   | 1        | rt        | 8 hrs.   | 55 %               |
| 10    | NBS                                  | β-CD/H <sub>2</sub> O | 1        | 0 °C - rt | 12 hrs.  | No product formed  |
| 11    | NFSI                                 | CAN                   | 1        | 0 °C - rt | 8 hrs.   | 62%                |

## Characterization data of 1b-8b

### 2-((2-chloro-4-fluorobenzyl)sulfinyl)-1-methyl-1H-imidazole (1b)

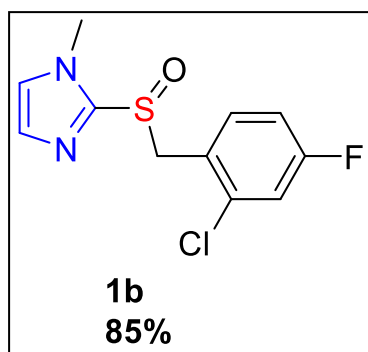

The title compound was isolated by flash chromatography; Yield: 85 % (218 mgs), Yellowish liquid, <sup>1</sup>H NMR (600MHz, CDCl<sub>3</sub>) δ 7.24 – 7.20 (m, 2H), 7.17 (dd, *J* = 8.4, 2.6 Hz, 1H), 6.98 (s, 1H), 6.93 (td, *J* = 8.3, 2.6 Hz, 1H), 4.85 (d, *J* = 12.8 Hz, 1H), 4.64 (d, *J* = 12.8 Hz, 1H), 3.68 (s, 3H); <sup>13</sup>C{<sup>1</sup>H} NMR (151 MHz, CDCl<sub>3</sub>): δ <sup>13</sup>C NMR (151 MHz, ) δ 161.59 (d, <sup>1</sup>*J*<sub>C-F</sub> = 252.0 Hz), 143.20, 134.95 (d, <sup>3</sup>*J*<sub>C-F</sub> = 10.3 Hz), 133.24 (d, <sup>3</sup>*J*<sub>C-F</sub> = 8.8 Hz), 129.03, 123.97, 122.65, 116.14 (d, <sup>2</sup>*J*<sub>C-F</sub> = 24.9 Hz), 113.47 (d, <sup>2</sup>*J*<sub>C-F</sub> = 21.2 Hz), 55.38, 32.32.

## 2-(benzylsulfinyl)-1-methyl-1H-imidazole (2b)

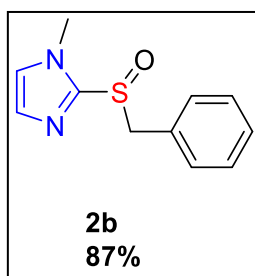

The title compound was isolated by flash chromatography; Yield: 87 % (294 mg), Yellowish liquid;  $^1\text{H}$  NMR (600MHz,  $\text{CDCl}_3$ )  $\delta$  7.35 – 7.27 (m, 3H), 7.21 (s, 1H), 7.06 (d,  $J = 7.2$  Hz, 2H), 6.85 (s, 1H), 4.59 (d,  $J = 12.7$  Hz, 1H), 4.40 (d,  $J = 12.7$  Hz, 1H), 3.33 (s, 3H);  $^{13}\text{C}\{^1\text{H}\}$  NMR (151 MHz,  $\text{CDCl}_3$ ):  $\delta$  143.32, 130.54, 129.84, 129.03, 128.62, 128.57, 124.60, 60.32, 32.91.

## 2-((4-bromobenzyl)sulfinyl)-1-methyl-1H-imidazole (3b)

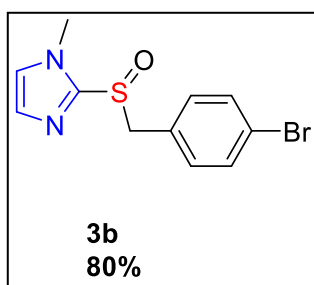

The title compound was isolated by flash chromatography; Yield: 80 % (328 mg), White solid, m.p. 160-163 °C;  $^1\text{H}$  NMR (600MHz,  $\text{CDCl}_3$ )  $\delta$  7.43 (d,  $J = 8.3$  Hz, 2H), 7.22 (s, 1H), 6.98 (d,  $J = 8.3$  Hz, 2H), 6.90 (s, 1H), 4.57 (d,  $J = 12.8$  Hz, 1H), 4.37 (d,  $J = 12.8$  Hz, 1H), 3.47 (s, 3H);  $^{13}\text{C}\{^1\text{H}\}$  NMR (151 MHz,  $\text{CDCl}_3$ ):  $\delta$  143.05, 132.16, 131.76, 129.84, 128.21, 124.85, 122.91, 59.33, 33.12.

## 2-((4-bromo-2-fluorobenzyl)sulfinyl)-1-methyl-1H-imidazole (4b)

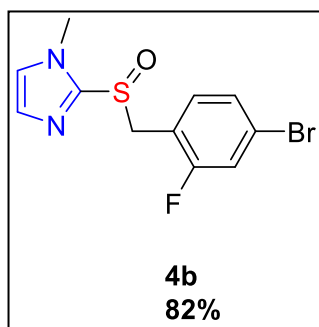

The title compound was isolated by flash chromatography; Yield: 82% (246 mg), White solid, 128-130 °C;  $^1\text{H}$  NMR (600MHz,  $\text{CDCl}_3$ )  $\delta$  7.30 – 7.27 (m, 1H), 7.25 (dd,  $J = 8.2, 1.7$  Hz, 1H), 7.23 (d,  $J = 1.1$  Hz, 1H), 7.05 (t,  $J = 7.9$  Hz, 1H), 6.98 (s, 1H), 4.69 (d,  $J = 12.2$  Hz, 1H), 4.53 (d,  $J = 12.2$  Hz, 1H), 3.69 (s, 3H);  $^{13}\text{C}\{^1\text{H}\}$  NMR (151 MHz,  $\text{CDCl}_3$ ):  $\delta$  161.12 (d,  $^1J_{\text{C-F}} = 253.7$  Hz), 143.58, 133.64, 129.87 (d,  $^3J_{\text{C-F}} = 4.8$  Hz), 127.69, 125.00, 119.24 (d,  $^3J_{\text{C-F}} = 5.7$  Hz), 119.08, 116.05 (d,  $^2J_{\text{C-F}} = 15.2$  Hz), 52.38, 33.29.

## 1-methyl-2-((4-(trifluoromethoxy)benzyl)sulfinyl)-1H-imidazole (5b)

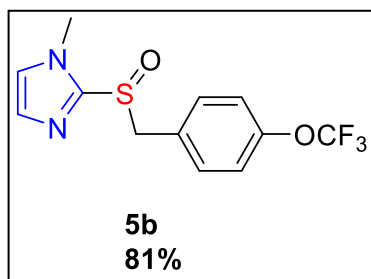

The title compound was isolated by flash chromatography; Yield: 81% (274 mg), Yellowish liquid, NMR (600MHz,  $\text{CDCl}_3$ )  $\delta$  7.21 (s, 1H), 7.16-7.13 (m, 4H), 6.88 (s, 1H), 4.58 (d,  $J = 12.9$  Hz, 1H), 4.41 (d,  $J = 12.9$  Hz, 1H), 3.44 (s, 3H);  $^{13}\text{C}\{^1\text{H}\}$  NMR (151 MHz,  $\text{CDCl}_3$ ):  $\delta$  149.60, 143.03, 132.15, 129.95, 128.16, 125.00, 121.17, 119.63, 59.27, 33.14.

## 2-((4-(tert-butyl)benzyl)sulfinyl)-1-methyl-1H-imidazole (6b)

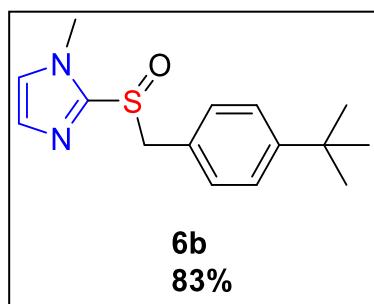

The title compound was isolated by flash chromatography; Yield: 83 % (310 mg), White solid, m.p. 120-122 °C;  $^1\text{H}$  NMR (600MHz,  $\text{CDCl}_3$ )  $\delta$  7.31 (d,  $J = 8.2$  Hz, 2H), 7.21 (s, 1H), 7.01 (d,  $J = 8.2$  Hz, 2H), 6.86 (s, 1H), 4.55 (d,  $J = 12.8$  Hz, 1H), 4.37 (d,  $J = 12.8$  Hz, 1H), 3.33 (s, 3H), 1.30 (s, 9H);  $^{13}\text{C}\{^1\text{H}\}$  NMR (151 MHz,  $\text{CDCl}_3$ ):  $\delta$  150.82, 142.58, 129.22, 128.75, 124.99, 124.54, 123.54, 58.96, 33.61, 31.83, 30.25.

## 1-methyl-2-((3-(trifluoromethyl)benzyl)sulfinyl)-1H-imidazole (7b)

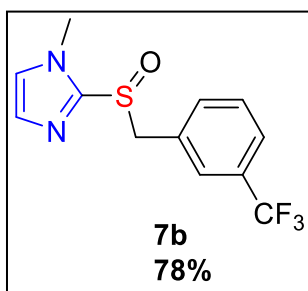

The title compound was isolated by flash chromatography; Yield: 78% (263 mg), Yellowish liquid,  $^1\text{H}$  NMR (600MHz,  $\text{CDCl}_3$ )  $\delta$  7.61 (d,  $J = 7.9$  Hz, 1H), 7.45 (t,  $J = 7.7$  Hz, 1H), 7.38 (d,  $J = 7.7$  Hz, 1H), 7.24 (d,  $J = 9.9$  Hz, 2H), 6.88 (s, 1H), 4.63 (d,  $J = 12.9$  Hz, 1H), 4.46 (d,  $J = 12.9$  Hz, 1H), 3.40 (s, 3H);  $^{13}\text{C}\{^1\text{H}\}$  NMR (151 MHz,  $\text{CDCl}_3$ ):  $\delta$  142.58, 134.19, 131.08 (q,  $J = 32.4$  Hz), 130.35, 129.86, 129.04, 127.10, 125.30, 124.99, 124.62, 122.82, 59.59,

33.01.

## 1-methyl-2-((4-nitrobenzyl)sulfinyl)-1H-imidazole (8b)

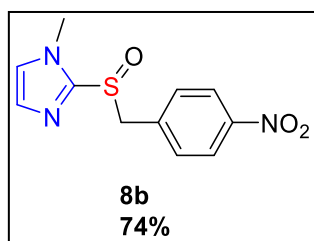

The title compound was isolated by flash chromatography; Yield: 74% (321 mg), White solid, m.p. 115-117 °C;  $^1\text{H}$  NMR (600MHz,  $\text{CDCl}_3$ )  $\delta$  8.17 (d,  $J = 8.7$  Hz, 2H), 7.35 (d,  $J = 8.7$  Hz, 2H), 7.22 (s, 1H), 6.93 (s, 1H), 4.71 (d,  $J = 12.8$  Hz, 1H), 4.57 (d,  $J = 12.8$  Hz, 1H), 3.56 (s, 3H);  $^{13}\text{C}\{^1\text{H}\}$  NMR (151 MHz,  $\text{CDCl}_3$ ):  $\delta$  147.96, 142.68, 136.84, 131.56, 129.91, 125.24, 123.61, 58.94, 33.35.



## Experimental procedures for the compounds (1c-8c)

2-((2-chloro-4-fluorobenzyl)thio)-1-methyl-1H-imidazole (**1a**) (256 mgs, 1 mmol, 1 equiv) was added in ice cooled Dichloromethane (DCM). To the solution of the reaction mixture mCPBA (459.2 mgs, 2.8 mmol, 2.8 equiv.) was added. The reaction was continued for 8 hr. at room temperature. Progression of the reaction was monitored by TLC. Upon completion the reaction was quenched with saturated aqueous solution of Sodium Bicarbonate (NaHCO<sub>3</sub>) and extracted with DCM (3\*10 ml). The combined organic layer was dried over (Na<sub>2</sub>SO<sub>4</sub>), concentrated to provide pure product as white solid without any further purification.

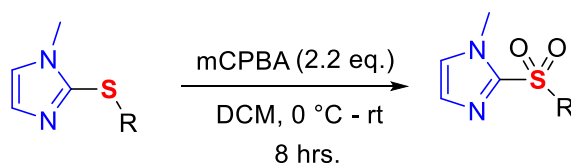

Scheme S3: Synthesis of sulfide derivatives (**1c-8c**)

## Characterization data of 1c-8c

### 2-((2-chloro-4-fluorobenzyl)sulfonyl)-1-methyl-1H-imidazole (**1c**)

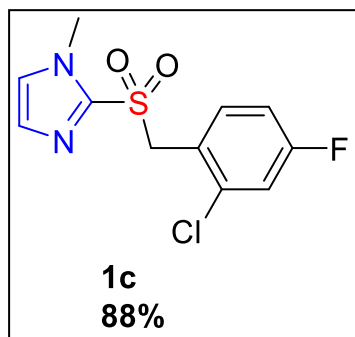

The title compound was isolated by (DCM/H<sub>2</sub>O) work up; Yield: 88 % (253 mgs), white solid, m.p. 124-126 °C; <sup>1</sup>H NMR (600MHz, CDCl<sub>3</sub>) δ 7.26 – 7.23 (m, 1H), 7.21 (s, 1H), 7.16 (dd, *J* = 8.3, 2.6 Hz, 1H), 7.01 – 6.95 (m, 2H), 4.81 (s, 2H), 3.59 (s, 3H); <sup>13</sup>C{<sup>1</sup>H} NMR (151 MHz, CDCl<sub>3</sub>): δ 162.82 (d, <sup>1</sup>*J*<sub>C-F</sub> = 253.3 Hz), 140.68, 136.70 (d, <sup>3</sup>*J*<sub>C-F</sub> = 10.4 Hz), 134.26 (d, <sup>3</sup>*J*<sub>C-F</sub> = 9.8 Hz), 129.92 (d, <sup>2</sup>*J*<sub>C-F</sub> = 14.4 Hz), 126.16 (d, <sup>2</sup>*J*<sub>C-F</sub> = 25.9 Hz), 121.85, 121.84, 117.50 (d, <sup>2</sup>*J*<sub>C-F</sub> = 19.2 Hz), 114.68 (d, <sup>3</sup>*J*<sub>C-F</sub> = 10.5 Hz), 57.96, 34.88.

### 2-(benzylsulfonyl)-1-methyl-1H-imidazole (**2c**)

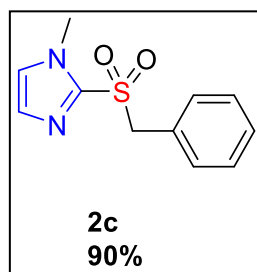

The title compound was isolated by (DCM/H<sub>2</sub>O) work up; Yield: 90 % (212.4 mgs), White solid, m.p. 105-108 °C; <sup>1</sup>H NMR (600MHz, CDCl<sub>3</sub>) δ 7.37 – 7.34 (m, 1H), 7.30-7.28 (m, 2H); 7.22 (s, 1H), 7.06 (d, *J* = 8.2 Hz, 2H), 6.84 (s, 1H), 4.57 (s, 2H), 3.26 (s, 3H); <sup>13</sup>C{<sup>1</sup>H} NMR (151 MHz, CDCl<sub>3</sub>): 140.55, 130.98, 129.73, 129.14, 128.70, 127.32, 125.62, 62.29, 34.52.

### 2-((4-bromobenzyl)sulfonyl)-1-methyl-1H-imidazole (3c)

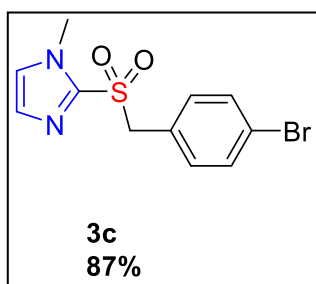

The title compound was isolated by (DCM/H<sub>2</sub>O) work up; Yield: 87 % (272 mgs), white solid, m.p. 145-147 °C; <sup>1</sup>H NMR (600MHz, CDCl<sub>3</sub>) δ 7.44 (d, *J* = 8.4 Hz, 2H), 7.22 (s, 1H), 6.99 (d, *J* = 8.4 Hz, 2H), 6.89 (s, 1H), 4.56 (s, 2H), 3.44 (s, 3H); <sup>13</sup>C{<sup>1</sup>H} NMR (151 MHz, CDCl<sub>3</sub>): 140.52, 132.64, 132.52, 131.91, 129.77, 129.66, 126.33, 125.75, 125.66, 123.61, 61.33, 34.76.

### 2-((4-bromo-2-fluorobenzyl)sulfonyl)-1-methyl-1H-imidazole (4c)

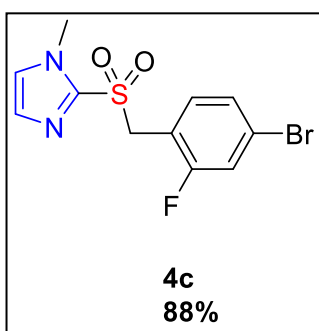

The title compound was isolated by (DCM/H<sub>2</sub>O) work up; Yield: 88% (292 mgs), White solid, m.p. 115-120 °C; <sup>1</sup>H NMR (600MHz, CDCl<sub>3</sub>) δ 7.21 (d, *J* = 1.9 Hz, 1H), 7.20 – 7.17 (m, 1H), 7.16 (s, 1H), 6.96 (t, *J* = 7.8 Hz, 1H), 6.90 (d, *J* = 1.1 Hz, 1H), 4.61 (s, 2H), 3.55 (s, 3H); <sup>13</sup>C{<sup>1</sup>H} NMR (151 MHz, CDCl<sub>3</sub>): 161.34 (d, <sup>1</sup>*J*<sub>C-F</sub> = 255.6 Hz), 140.68, 133.61, 129.79, 127.85, 125.97, 124.04 (d, <sup>3</sup>*J*<sub>C-F</sub> = 9.5 Hz), 119.55 (d, <sup>2</sup>*J*<sub>C-F</sub> = 24.7 Hz), 114.17 (d, <sup>2</sup>*J*<sub>C-F</sub> = 14.9 Hz), 54.60, 34.93.

### 1-methyl-2-((4-(trifluoromethoxy)benzyl)sulfonyl)-1H-imidazole (5c)

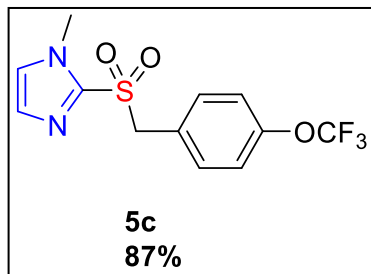

The title compound was isolated by (DCM/H<sub>2</sub>O) work up; Yield: 87% (278 mgs), White solid, m.p. 97-100 °C; NMR (500MHz, CDCl<sub>3</sub>) δ 7.23 (s, 1H), 7.16 (s, 4H), 6.89 (s, 1H), 4.62 (s, 2H), 3.41 (s, 3H); <sup>13</sup>C{<sup>1</sup>H} NMR (151 MHz, CDCl<sub>3</sub>): δ 149.94, 140.57, 132.69, 132.19, 129.87, 126.18, 125.85, 121.22, 61.27, 34.76.

### 2-((4-(tert-butyl)benzyl)sulfonyl)-1-methyl-1H-imidazole (6c)

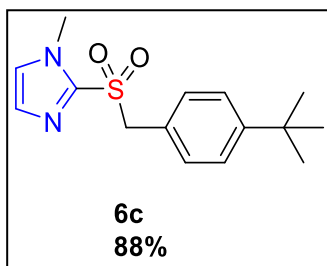

The title compound was isolated by (DCM/H<sub>2</sub>O) work-up Yield: 88 % (256 mg), white solid, m.p. 128-130 °C; <sup>1</sup>H NMR (600MHz, CDCl<sub>3</sub>) δ 7.31 (d, *J* = 8.3 Hz, 2H), 7.22 (s, 1H), 6.99 (d, *J* = 8.3 Hz, 2H), 6.85 (s, 1H), 4.53 (s, 2H), 3.23 (s, 3H), 1.29 (s, 9H); <sup>13</sup>C{<sup>1</sup>H} NMR (151 MHz, CDCl<sub>3</sub>): 152.65, 140.82, 130.81, 129.81, 125.73, 124.24, 62.00, 34.80, 34.49, 31.35.

### 1-methyl-2-((3-(trifluoromethyl)benzyl)sulfonyl)-1H-imidazole (7c)

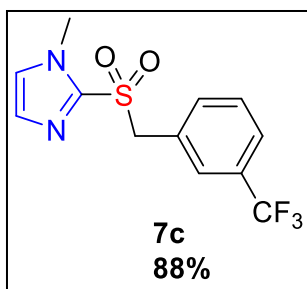

The title compound was isolated by (DCM/H<sub>2</sub>O) work up; Yield: 88% (267 mgs), white solid, m.p. 110-112 °C; <sup>1</sup>H NMR (600MHz, CDCl<sub>3</sub>) δ 7.63 (d, *J* = 7.7 Hz, 1H), 7.47 (t, *J* = 7.7 Hz, 1H), 7.41 (d, *J* = 7.7 Hz, 1H), 7.24 (s, 2H), 6.87 (s, 1H), 4.66 (s, 2H), 3.38 (s, 3H); <sup>13</sup>C{<sup>1</sup>H} NMR (151 MHz, CDCl<sub>3</sub>): δ 139.20, 133.53, 130.17 (q, *J* = 32.7 Hz), 128.83, 128.28, 127.55, 126.54, 124.79, 123.41, 121.60, 60.50, 33.6.

### 1-methyl-2-((4-nitrobenzyl)sulfonyl)-1H-imidazole (8c)

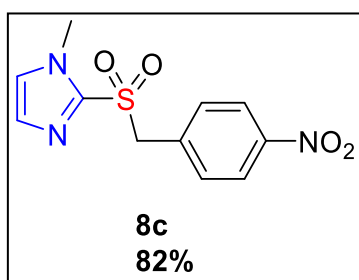

The title compound was isolated by (DCM/H<sub>2</sub>O) work up; Yield: 82% (230 mgs), White solid, m.p. 155-160 °C; <sup>1</sup>H NMR (600MHz, CDCl<sub>3</sub>) δ 8.18 (d, *J* = 6.9 Hz, 2H), 7.40 (d, *J* = 8.7 Hz, 2H), 7.23 (s, 1H), 6.93 (s, 1H), 4.78 (s, 2H), 3.57 (s, 3H); <sup>13</sup>C{<sup>1</sup>H} NMR (151 MHz, CDCl<sub>3</sub>): 147.23, 139.49, 133.41, 131.10, 128.69, 124.87, 122.71, 59.91, 33.93.

## Experimental procedures for the compounds (1d-8d)

The neutral sulfide (**1a**) (256 mgs, 1 mmol, 1 equiv) was dissolved in ice cooled DCM. The reaction was stirred continuously for 10 mins, and then MeOTf (137  $\mu$ l, 1.25 mmol, 1.25 equiv.) was added. The reaction was continued at room temperature for 1 hr. Progression of the reaction was monitored by TLC. The product was washed thoroughly with diethyl ether to give the desired product as white powder.

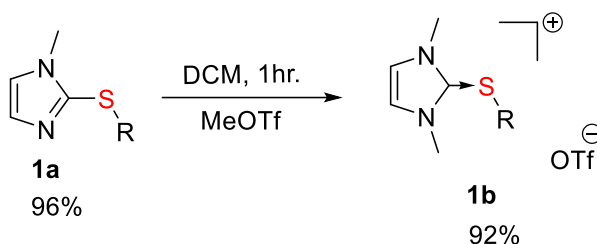

Scheme S4. Synthetic reaction scheme for the *N*-methylation of sulfides

## Characterization data of 1d-8d

### 1,3-dimethyl-2-((2-chloro-4-fluorobenzyl)thio)-1H-imidazol-3-ium Triflate (**1d**)

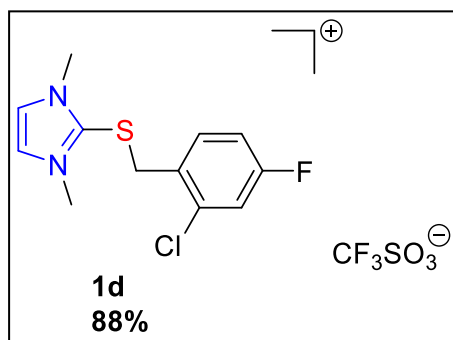

The title compound was isolated by successive Diethyl ether wash; Yield: 88 % (368 mgs), white solid, m.p. 115-117 °C;  $^1\text{H}$  NMR (600MHz,  $\text{DMSO-}d_6$ )  $\delta$  7.90 (s, 2H), 7.53 (dd,  $J = 8.8, 2.7$  Hz, 1H), 7.34 (dd,  $J = 8.6, 6.1$  Hz, 1H), 7.22 (td,  $J = 8.5, 2.6$  Hz, 1H), 4.34 (s, 2H), 3.64 (s, 6H);  $^{13}\text{C}\{^1\text{H}\}$  NMR (151 MHz,  $\text{DMSO-}d_6$ ):  $\delta$ 161.74 (d,  $^1J_{\text{C-F}} = 249.6$  Hz), 138.33, 133.83 (d,  $^3J_{\text{C-F}} = 10.6$  Hz), 132.78 (d,  $^3J_{\text{C-F}} = 9.0$  Hz), 130.57, 125.38, 117.21 (d,  $^2J_{\text{C-F}} = 25.3$  Hz), 115.24 (d,  $^2J_{\text{C-F}} = 21.3$  Hz), 40.05, 35.83;

$^{19}\text{F}$ -NMR (600 MHz,  $\text{DMSO-}d_6$ )  $\delta = -110.32$ ; HRMS (ESI-TOF)  $m/z$  Calcd for  $\text{C}_{12}\text{H}_{13}\text{ClFN}_2\text{S}^+$  [ $\text{M}^+$ ] 271.0467 found 271.0478.

### 1,3-dimethyl-2-(benzylthio)-1H-imidazol-3-ium Triflate (**2d**)

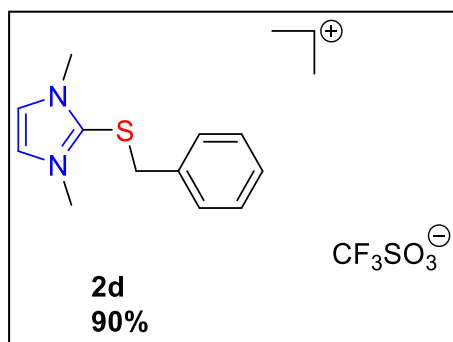

The title compound was isolated by successive Diethyl ether wash; Yield: 90 % (331.2 mg), white solid, m.p. 110-112 °C;  $^1\text{H}$  NMR (600MHz,  $\text{DMSO-}d_6$ ):  $\delta$  7.86 (s, 2H), 7.31 (d,  $J = 6.4$  Hz, 3H), 7.13 (d,  $J = 5.8$  Hz, 2H), 4.27 (s, 2H), 3.59 (s, 6H);  $^{13}\text{C}\{^1\text{H}\}$  NMR (151 MHz,  $\text{DMSO-}d_6$ ): 138.90, 136.52, 128.91, 128.86, 128.14, 125.11, 38.82, 35.78; HRMS (ESI-TOF)  $m/z$  Calcd for  $\text{C}_{12}\text{H}_{15}\text{N}_2\text{S}^+$  [ $\text{M}^+$ ] 219.0950 found 219.0959.

### 1,3-dimethyl-2-((4-bromobenzyl)thio)-1H-imidazol-3-ium Triflate (3d)

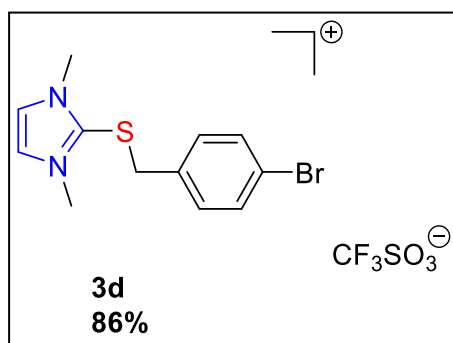

The title compound was isolated by successive Diethyl ether wash; Yield: 86 % (382 mg), white solid, m.p. 140-142 °C; <sup>1</sup>H NMR (600MHz, DMSO-*d*<sub>6</sub>) δ 7.89 (s, 2H), 7.53 (d, *J* = 7.8 Hz, 2H), 7.13 (d, *J* = 7.8 Hz, 2H), 4.25 (s, 2H), 3.63 (s, 6H); <sup>13</sup>C{<sup>1</sup>H} NMR (151 MHz, DMSO-*d*<sub>6</sub>): δ 138.74, 136.10, 131.84, 131.09, 125.21, 121.36, 37.97, 35.89; HRMS (ESI-TOF) m/z Calcd for C<sub>12</sub>H<sub>14</sub><sup>79</sup>BrN<sub>2</sub>S<sup>+</sup> [M<sup>+</sup>] 297.0056 found 297.0065; m/z Calcd for C<sub>12</sub>H<sub>14</sub><sup>81</sup>BrN<sub>2</sub>S<sup>+</sup> [M<sup>+</sup>] 299.0030 found

299.0044

### 1,3-dimethyl-2-((2-fluoro-4-bromobenzyl)thio)-1H-imidazol-3-ium Triflate (4d)

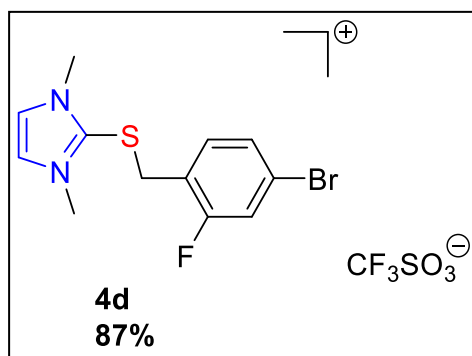

The title compound was isolated by successive Diethyl ether wash; Yield: 87 % (403.68 mgs), white solid, m.p. 125-127 °C; <sup>1</sup>H NMR (600MHz, DMSO-*d*<sub>6</sub>) δ 7.91 (d, *J* = 8.1 Hz, 1H), 7.76 (d, *J* = 7.9 Hz, 1H), 7.44-7.42 (m, 1H), 7.39 (d, *J* = 8.5 Hz, 2H), 7.36 (d, *J* = 6.4 Hz, 2H), 7.32-7.29 (m, 1H), 4.60 (s, 2H), 1.32 (s, 9H); <sup>13</sup>C{<sup>1</sup>H} NMR (151 MHz, DMSO-*d*<sub>6</sub>): δ 166.85, 153.33, 150.92, 135.43, 133.09, 128.97, 126.18, 125.82, 124.37, 121.66, 121.13, 37.52, 34.70, 31.43;

<sup>19</sup>F-NMR (600 MHz, DMSO-*d*<sub>6</sub>) δ = -115.57; HRMS (ESI-TOF) m/z Calcd for C<sub>12</sub>H<sub>13</sub><sup>79</sup>BrFN<sub>2</sub>S<sup>+</sup> [M<sup>+</sup>] 314.9961 found 314.9973; m/z Calcd for C<sub>12</sub>H<sub>13</sub><sup>81</sup>BrFN<sub>2</sub>S<sup>+</sup> [M<sup>+</sup>] 316.9940 found 316.9952.

### 1,3-dimethyl-2-((4-(trifluoromethoxy)benzyl)thio)-1H-imidazol-3-ium Triflate (5d)

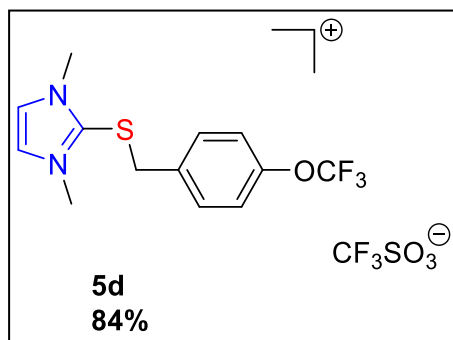

The title compound was isolated by successive Diethyl ether wash; Yield: 84 % (379.70 mgs), white solid, m.p. 85-87 °C; <sup>1</sup>H NMR (600MHz, DMSO-*d*<sub>6</sub>) δ 7.88 (s, 2H), 7.32 (s, 4H), 4.30 (s, 2H), 3.62 (s, 6H); <sup>13</sup>C{<sup>1</sup>H} NMR (151 MHz, DMSO-*d*<sub>6</sub>): δ 147.99, 138.73, 136.22, 130.92, 125.22, 121.49, 37.77, 35.83; <sup>19</sup>F-NMR (600 MHz, DMSO-*d*<sub>6</sub>) δ = -56.79; HRMS (ESI-TOF) m/z Calcd for C<sub>13</sub>H<sub>14</sub>F<sub>3</sub>N<sub>2</sub>OS<sup>+</sup> [M<sup>+</sup>] 303.0773 found 303.0786.

### 1,3-dimethyl-2-((4-(tert-butyl)benzyl)thio)-1H-imidazol-3-ium Triflate (6d)

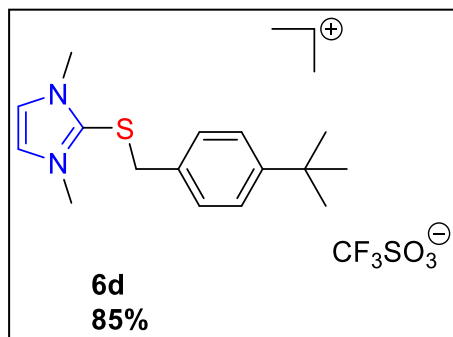

The title compound was isolated by successive Diethyl ether wash; Yield: 85 % (360 mgs), white solid, m.p. 130-132 °C; <sup>1</sup>H NMR (600MHz, DMSO-*d*<sub>6</sub>) δ 7.87 (s, 2H), 7.31 (d, *J* = 8.1 Hz, 2H), 7.04 (d, *J* = 8.1 Hz, 2H), 4.23 (s, 2H), 3.57 (s, 6H), 1.26 (s, 9H); <sup>13</sup>C{<sup>1</sup>H} NMR (151 MHz, DMSO-*d*<sub>6</sub>): 150.97, 138.96, 133.38, 128.58, 125.58, 125.08, 38.70, 35.71, 34.33, 31.04; HRMS (ESI-TOF) *m/z* Calcd for C<sub>16</sub>H<sub>23</sub>N<sub>2</sub>S<sup>+</sup> [M<sup>+</sup>] 275.1576 found 275.1589.

### 1,3-dimethyl-2-((3-(trifluoromethyl)benzyl)thio)-1H-imidazol-3-ium Triflate (7d)

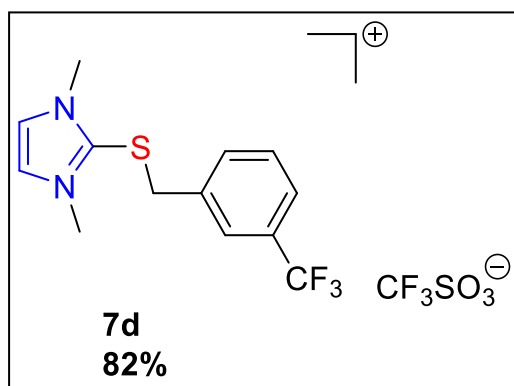

The title compound was isolated by successive Diethyl ether wash; Yield: 82 % (357 mgs), white solid, m.p. 90-93 °C; <sup>1</sup>H NMR (600MHz, DMSO-*d*<sub>6</sub>) δ 7.90 (s, 2H), 7.70 (d, *J* = 7.1 Hz, 1H), 7.60 – 7.55 (m, 2H), 7.48 (s, 1H), 4.36 (s, 2H), 3.60 (s, 6H); <sup>13</sup>C{<sup>1</sup>H} NMR (151 MHz, DMSO-*d*<sub>6</sub>): δ 138.64, 138.29, 133.18, 130.15, 129.64, 129.42, 125.49, 125.24, 124.72, 37.88, 35.83; <sup>19</sup>F-NMR (600 MHz, DMSO-*d*<sub>6</sub>) δ = -62.61; HRMS (ESI-TOF) *m/z* Calcd for C<sub>13</sub>H<sub>14</sub>F<sub>3</sub>N<sub>2</sub>S<sup>+</sup> [M<sup>+</sup>] 287.0824 found

287.0768.

### 1,3-dimethyl-2-((4-nitrobenzyl)thio)-1H-imidazol-3-ium Triflate (8d)

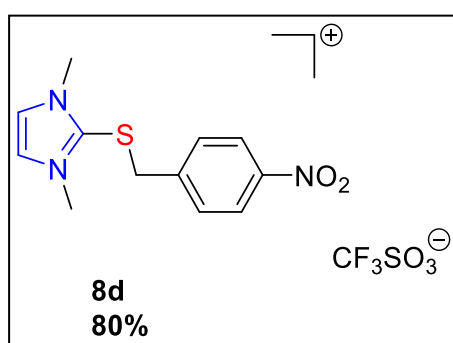

The title compound was isolated by successive Diethyl ether wash; Yield: 80 % (330 mgs), white solid, m.p. 130-132 °C; <sup>1</sup>H NMR (600MHz, DMSO-*d*<sub>6</sub>) δ 8.19 (d, *J* = 8.5 Hz, 2H), 7.88 (s, 2H), 7.47 (d, *J* = 8.5 Hz, 2H), 4.40 (s, 2H), 3.63 (s, 6H); <sup>13</sup>C{<sup>1</sup>H} NMR (151 MHz, DMSO-*d*<sub>6</sub>): δ 147.06, 144.59, 138.41, 130.20, 125.34, 124.07, 37.64, 35.98; HRMS (ESI-TOF) *m/z* Calcd for C<sub>12</sub>H<sub>14</sub>N<sub>3</sub>O<sub>2</sub>S<sup>+</sup> [M<sup>+</sup>] 264.0801 found 264.0812.

## Experimental procedures for the compounds (1e-8e)

The neutral sulfoxide (**1b**) (272 mgs, 1 mmol, 1 equiv.) was dissolved in ice cooled DCM. The reaction was stirred continuously for 10 mins, and then MeOTf (137  $\mu$ l, 1.25 mmol, 1.25 equiv.) was added. The reaction was continued at room temperature for 1 hr. Progression of the reaction was monitored by TLC. The product was washed thoroughly with diethyl ether to give the desired product as white powder.

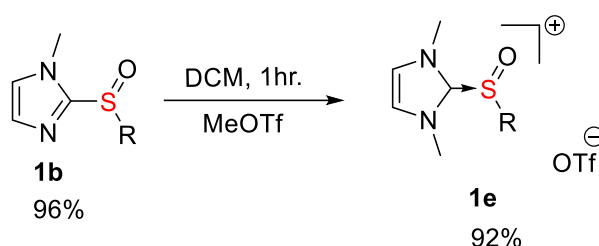

Scheme S5. Synthetic reaction scheme for the *N*-methylation of sulfoxides

### 1,3-dimethyl-2-((2-chloro-4-fluorobenzyl)sulfinyl)-1H-imidazol-3-ium Triflate (**1e**)

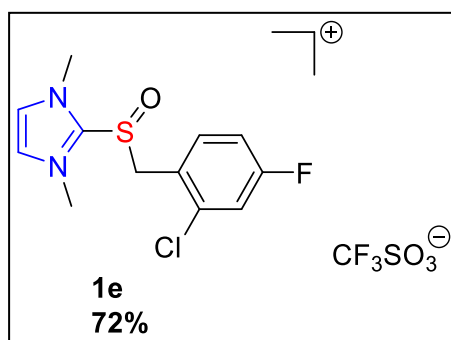

The title compound was isolated by successive Diethyl ether wash; Yield: 72 % (314 mgs), white solid, m.p. 135-137 °C;  $^1\text{H}$  NMR (600MHz,  $\text{CD}_3\text{OD}$ )  $\delta$  7.76 (s, 2H), 7.55 (dd,  $J = 8.6, 5.9$  Hz, 1H), 7.40 (dd,  $J = 8.5, 2.6$  Hz, 1H), 7.23 (td,  $J = 8.3, 2.7$  Hz, 1H), 5.02 (d,  $J = 13.6$  Hz, 1H), 4.96 (d,  $J = 13.6$  Hz, 1H), 3.74 (s, 6H);  $^{13}\text{C}\{^1\text{H}\}$  NMR (151 MHz,  $\text{CD}_3\text{OD}$ ):  $\delta$  164.82 (d,  $^1J_{\text{C-F}} = 253.2$  Hz), 141.80, 136.82 (d,  $^3J_{\text{C-F}} = 11.0$  Hz), 136.56 (d,  $^3J_{\text{C-F}} = 9.0$  Hz), 127.96, 123.14, 118.87 (d,  $^2J_{\text{C-F}} = 25.2$  Hz), 116.43 (d,  $^2J_{\text{C-F}} = 21.2$  Hz), 56.76, 36.24;  $^{19}\text{F}$ -NMR (600 MHz,  $\text{DMSO-}d_6$ )  $\delta = -103.61$ ; HRMS (ESI-TOF)  $m/z$  Calcd for  $\text{C}_{12}\text{H}_{13}\text{ClFN}_2\text{OS}^+$  [ $\text{M}^+$ ] 287.0416 found 287.0458.

### 1,3-dimethyl-2-(benzylsulfinyl)-1H-imidazol-3-ium Triflate (**2e**)

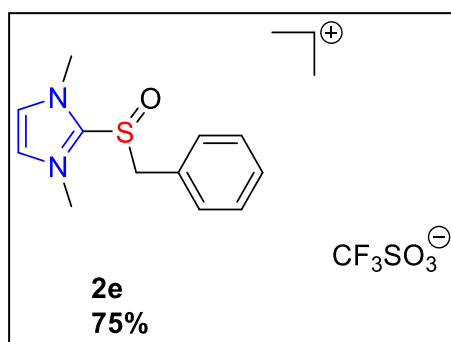

The title compound was isolated by successive Diethyl ether wash; Yield: 75 % (288 mgs), white solid, m.p. 125-127 °C;  $^1\text{H}$  NMR (600MHz,  $\text{DMSO-}d_6$ )  $\delta$  7.85 (s, 2H), 7.41 (dt,  $J = 35.0, 7.6$  Hz, 3H), 7.21 (s, 2H), 4.91 (s, 2H), 3.56 (s, 6H);  $^{13}\text{C}\{^1\text{H}\}$  NMR (151 MHz,  $\text{DMSO-}d_6$ ):  $\delta$  140.21, 130.68, 129.20, 129.00, 127.88, 126.04, 58.14, 35.22; HRMS (ESI-TOF)  $m/z$  Calcd for [ $\text{M}^+$ ]  $\text{C}_{12}\text{H}_{15}\text{N}_2\text{OS}^+$  [ $\text{M}^+$ ] 235.0900 found 235.0916.

### 1,3-dimethyl-2-(benzylsulfinyl)-1H-imidazol-3-ium Triflate (2e)

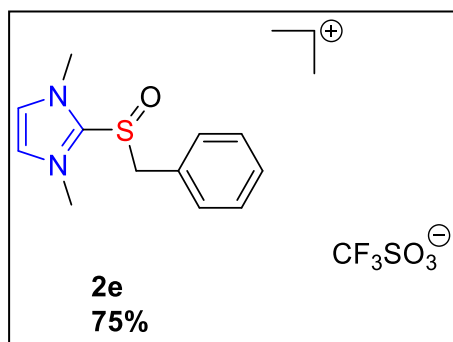

The title compound was isolated by successive Diethyl ether wash; Yield: 75 % (288 mgs), white solid, m.p. 125-127 °C; <sup>1</sup>H NMR (600MHz, (CD<sub>3</sub>)<sub>2</sub>CO); δ 7.88 (s, 2H), 7.49 (t, *J* = 7.3 Hz, 1H), 7.43 (t, *J* = 7.5 Hz, 2H), 7.35 (d, *J* = 1.2 Hz, 2H), 5.02 (d, *J* = 13.2 Hz, 1H), 4.99 (d, *J* = 13.2 Hz, 1H), 3.80 (s, 6H); <sup>13</sup>C{<sup>1</sup>H} NMR (151 MHz, (CD<sub>3</sub>)<sub>2</sub>CO); δ 141.77, 131.75, 130.38, 130.13, 128.73, 127.45, 60.15, 36.24; HRMS (ESI-TOF) m/z Calcd for [M<sup>+</sup>] C<sub>12</sub>H<sub>15</sub>N<sub>2</sub>OS<sup>+</sup> [M<sup>+</sup>] 235.0900 found

235.0916.

### 1,3-dimethyl-2-((4-bromobenzyl)sulfinyl)-1H-imidazol-3-ium Triflate (3e)

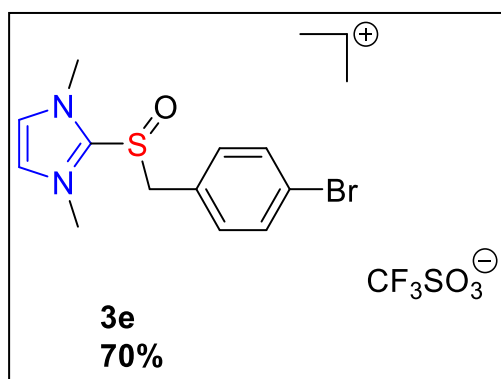

The title compound was isolated by successive Diethyl ether wash; Yield: 70 % (323 mgs), white solid, m.p. 140-142 °C; <sup>1</sup>H NMR (600MHz, DMSO-*d*<sub>6</sub>); δ 7.87 (s, 2H), 7.61 (d, *J* = 8.0 Hz, 2H), 7.19 (d, *J* = 8.1 Hz, 2H), 4.87 (s, 2H), 3.60 (s, 6H); <sup>13</sup>C{<sup>1</sup>H} NMR (151 MHz, (DMSO-*d*<sub>6</sub>); δ 140.04, 132.81, 131.96, 127.50, 126.14, 122.78, 57.31, 35.34; HRMS (ESI-TOF) m/z Calcd for C<sub>12</sub>H<sub>14</sub><sup>79</sup>BrN<sub>2</sub>OS<sup>+</sup> [M<sup>+</sup>] 313.0005 found 313.0014; m/z Calcd for C<sub>12</sub>H<sub>14</sub><sup>81</sup>BrN<sub>2</sub>OS<sup>+</sup> [M<sup>+</sup>] 314.9982 found 314.9993.

### 1,3-dimethyl-2-((4-bromobenzyl)sulfinyl)-1H-imidazol-3-ium Triflate (3e)

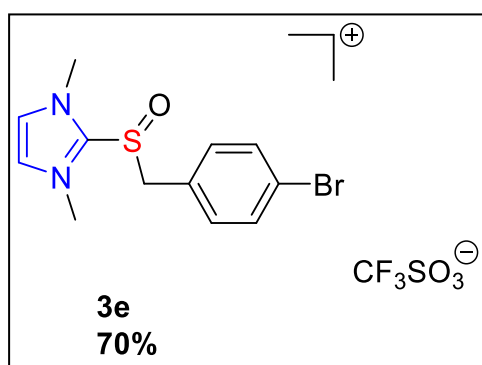

The title compound was isolated by successive Diethyl ether wash; Yield: 70 % (323 mgs), white solid, m.p. 140-142 °C; <sup>1</sup>H NMR (600MHz, (CD<sub>3</sub>)<sub>2</sub>CO); δ 7.91 (s, 2H), 7.63 (d, *J* = 8.4 Hz, 2H), 7.35 (d, *J* = 8.4 Hz, 2H), 5.02 (d, *J* = 13.2 Hz, 1H), 4.99 (d, *J* = 13.2 Hz, 1H), 3.88 (s, 6H); <sup>13</sup>C{<sup>1</sup>H} NMR (151 MHz, (CD<sub>3</sub>)<sub>2</sub>CO); δ 133.55, 132.95, 128.12, 127.36, 124.01, 59.04, 36.16; HRMS (ESI-TOF) m/z Calcd for C<sub>12</sub>H<sub>14</sub><sup>79</sup>BrN<sub>2</sub>OS<sup>+</sup> [M<sup>+</sup>] 313.0005 found 313.0014; m/z

Calcd for C<sub>12</sub>H<sub>14</sub><sup>81</sup>BrN<sub>2</sub>OS<sup>+</sup> [M<sup>+</sup>] 314.9982 found 314.9993.



**1,3-dimethyl-2-((2-fluoro-4-bromobenzyl)sulfinyl)-1H-imidazol-3-ium Triflate (4e)**

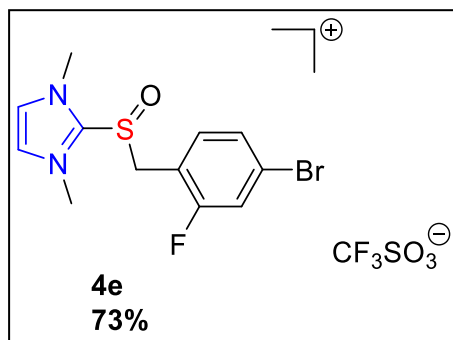

The title compound was isolated by successive Diethyl ether wash; Yield: 73 % (349 mgs), white solid, m.p. 130-132 °C; <sup>1</sup>H NMR (600MHz, DMSO-*d*<sub>6</sub>) δ 7.91 (s, 2H), 7.66 (d, *J* = 9.2 Hz, 1H), 7.54 (d, *J* = 7.9 Hz, 1H), 7.36 (t, *J* = 7.9 Hz, 1H), 4.99 (d, *J* = 13.4 Hz, 1H), 4.91 (d, *J* = 13.4 Hz, 1H), 3.67 (s, 6H); <sup>13</sup>C{<sup>1</sup>H} NMR (151 MHz, DMSO-*d*<sub>6</sub>): 160.74 (d, <sup>1</sup>*J*<sub>C-F</sub> = 252.6 Hz), 139.94, 134.58, 128.44, 126.32, 123.42 (d, <sup>3</sup>*J*<sub>C-F</sub> = 9.3 Hz), 119.32 (d, <sup>2</sup>*J*<sub>C-F</sub> = 24.8 Hz), 115.11 (d, <sup>2</sup>*J*<sub>C-F</sub> = 15.0 Hz),

51.39, 35.37; <sup>19</sup>F-NMR (600 MHz, DMSO-*d*<sub>6</sub>) δ = -110.46; HRMS (ESI-TOF) m/z Calcd for C<sub>12</sub>H<sub>13</sub><sup>79</sup>BrFN<sub>2</sub>OS<sup>+</sup> [M<sup>+</sup>] 330.9911 found 330.9923; m/z Calcd for C<sub>12</sub>H<sub>13</sub><sup>81</sup>BrFN<sub>2</sub>OS<sup>+</sup> [M<sup>+</sup>] 332.9892 found 332.9902.

**1,3-dimethyl-2-((4-(trifluoromethoxy)benzyl)sulfinyl)-1H-imidazol-3-ium Triflate (5e)**

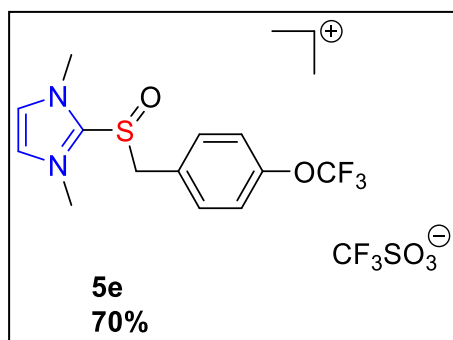

The title compound was isolated by successive Diethyl ether wash; Yield: 70 % (327 mgs), white solid, m.p. 137-139 °C; <sup>1</sup>H NMR (600MHz, DMSO-*d*<sub>6</sub>) δ 7.88 (s, 2H), 7.45 – 7.36 (m, 4H), 4.93 (s, 2H), 3.61 (s, 6H); <sup>13</sup>C{<sup>1</sup>H} NMR (151 MHz, DMSO-*d*<sub>6</sub>): δ 148.94, 140.02, 132.78, 127.68, 126.16, 121.54, 57.07, 35.28; <sup>19</sup>F-NMR (600 MHz, DMSO-*d*<sub>6</sub>) δ = -52.39; HRMS (ESI-TOF) m/z Calcd for C<sub>13</sub>H<sub>14</sub>F<sub>3</sub>N<sub>2</sub>O<sub>2</sub>S<sup>+</sup> [M]<sup>+</sup> 319.0723; found: 319.0744.

**1,3-dimethyl-2-((4-(trifluoromethoxy)benzyl)sulfinyl)-1H-imidazol-3-ium Triflate (5e)**

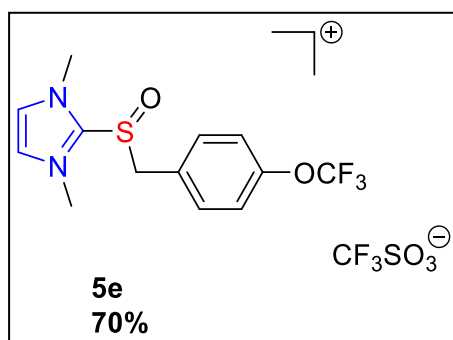

The title compound was isolated by successive Diethyl ether wash; Yield: 70 % (327 mgs), white solid, m.p. 137-139 °C; <sup>1</sup>H NMR (600MHz, CD<sub>3</sub>OD) δ 7.73 (s, 2H), 7.34 (s, 4H), 4.88 (d, *J* = 13.3 Hz, 1H), 4.83 (d, *J* = 13.3 Hz, 1H), 3.68 (s, 6H); <sup>13</sup>C{<sup>1</sup>H} NMR (151 MHz, CD<sub>3</sub>OD): δ 151.52, 142.06, 133.87, 128.32, 127.71, 122.91, 59.37, 36.23; <sup>19</sup>F-NMR (600 MHz, DMSO-*d*<sub>6</sub>) δ = -52.39; HRMS (ESI-TOF) m/z Calcd for C<sub>13</sub>H<sub>14</sub>F<sub>3</sub>N<sub>2</sub>O<sub>2</sub>S<sup>+</sup> [M]<sup>+</sup> 319.0723; found: 319.0744.

### 1,3-dimethyl-2-((4-(tert-butyl)benzyl)sulfinyl)-1H-imidazol-3-ium Triflate (6e)

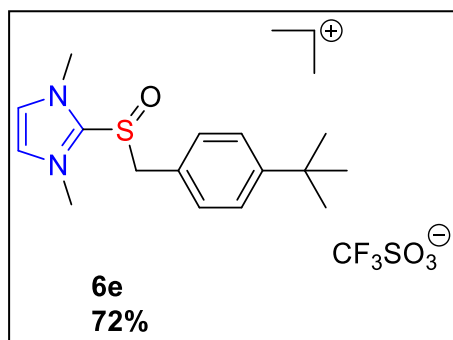

The title compound was isolated by successive Diethyl ether wash; Yield: 72 % (316 mgs), yellow solid, m.p. 135-137 °C; <sup>1</sup>H NMR (600MHz, DMSO-*d*<sub>6</sub>) δ 7.86 (s, 2H), 7.39 (d, *J* = 8.1 Hz, 2H), 7.12 (d, *J* = 8.0 Hz, 2H), 4.87 (s, 2H), 3.53 (s, 6H), 1.27 (s, 9H); <sup>13</sup>C{<sup>1</sup>H} NMR (151 MHz, DMSO-*d*<sub>6</sub>): 152.15, 140.31, 130.41, 126.01, 125.74, 124.79, 57.89, 35.14, 34.47, 30.99; HRMS (ESI-TOF) *m/z* Calcd for C<sub>16</sub>H<sub>23</sub>N<sub>2</sub>OS<sup>+</sup> [M<sup>+</sup>] 291.1526 found 291.1545.

### 1,3-dimethyl-2-((4-(tert-butyl)benzyl)sulfinyl)-1H-imidazol-3-ium Triflate (6e)

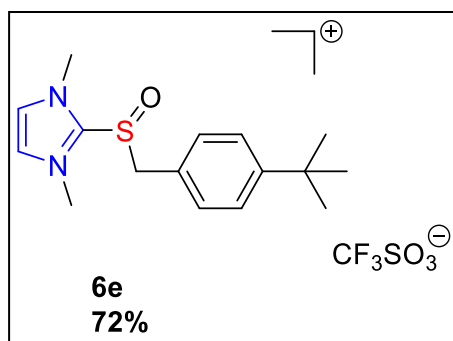

The title compound was isolated by successive Diethyl ether wash; Yield: 72 % (316 mgs), yellow solid, m.p. 135-137 °C; <sup>1</sup>H NMR (600MHz, (CD<sub>3</sub>)<sub>2</sub>CO) δ 7.89 (s, 2H), 7.47 (d, *J* = 8.3 Hz, 2H), 7.26 (d, *J* = 8.3 Hz, 2H), 4.99 (d, *J* = 13.2 Hz, 1H), 4.96 (d, *J* = 13.2 Hz, 1H), 3.77 (s, 6H), 1.32 (s, 9H); <sup>13</sup>C{<sup>1</sup>H} NMR (151 MHz, (CD<sub>3</sub>)<sub>2</sub>CO): 153.80, 141.87, 131.49, 127.38, 127.00, 125.54, 59.87, 36.17, 35.31, 31.45; HRMS (ESI-TOF) *m/z* Calcd for C<sub>16</sub>H<sub>23</sub>N<sub>2</sub>OS<sup>+</sup> [M<sup>+</sup>] 291.1526 found

291.1545.

### 1,3-dimethyl-2-((3-(trifluoromethyl)benzyl)sulfinyl)-1H-imidazol-3-ium Triflate (7e)

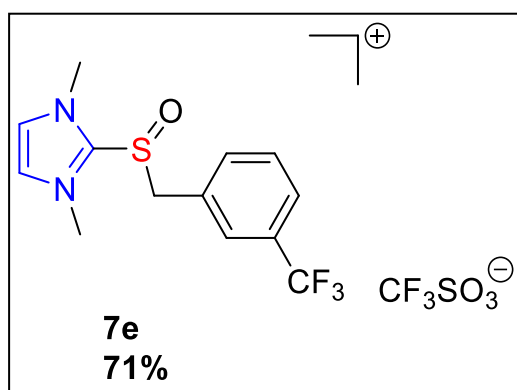

The title compound was isolated by successive Diethyl ether wash; Yield: 71 % (320 mgs), white solid, m.p. 145-147 °C; <sup>1</sup>H NMR (600MHz, DMSO-*d*<sub>6</sub>) δ 7.89 (s, 2H), 7.83 (d, *J* = 7.6 Hz, 1H), 7.67 (t, *J* = 7.7 Hz, 1H), 7.62 (d, *J* = 7.8 Hz, 1H), 7.59 (s, 1H), 5.00 (d, *J* = 12.9 Hz, 1H), 4.96 (d, *J* = 12.9 Hz, 1H), 3.58 (s, 6H); <sup>13</sup>C{<sup>1</sup>H} NMR (151 MHz, DMSO-*d*<sub>6</sub>): 139.92, 135.13, 130.05, 129.75, 127.28, 126.16, 125.78, 122.92, 57.26, 35.30; <sup>19</sup>F-NMR (600 MHz, DMSO-*d*<sub>6</sub>) δ = -56.76; HRMS (ESI-TOF) *m/z* Calcd for C<sub>13</sub>H<sub>14</sub>F<sub>3</sub>N<sub>2</sub>OS<sup>+</sup> [M<sup>+</sup>]

303.0773 found 303.0785.

### 1,3-dimethyl-2-((4-nitrobenzyl)sulfinyl)-1H-imidazol-3-ium Triflate (8e)

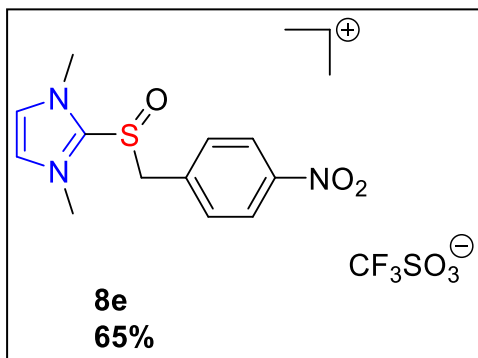

The title compound was isolated by successive Diethyl ether wash; Yield: 65 % (278 mgs), white solid, m.p. 150-152 °C;  $^1\text{H}$  NMR (600MHz,  $\text{DMSO-}d_6$ )  $\delta$  8.26 (d,  $J = 8.4$  Hz, 2H), 7.88 (s, 2H), 7.55 (d,  $J = 8.4$  Hz, 2H), 5.06 (d,  $J = 12.8$  Hz, 1H), 5.02 (d,  $J = 12.8$  Hz, 1H), 3.63 (s, 6H);  $^{13}\text{C}\{^1\text{H}\}$  NMR (151 MHz,  $\text{DMSO-}d_6$ ):  $\delta$  147.89, 139.75, 135.91, 132.06, 126.28, 123.93, 57.26, 35.48; HRMS (ESI-TOF)  $m/z$  Calcd for  $[\text{M}^+]$   $\text{C}_{12}\text{H}_{14}\text{N}_3\text{O}_3\text{S}^+$  280.0750 found 280.0768.

## Experimental procedures for the compounds (1f-8f)

The neutral sulfone (**1c**) (288 mgs, 1 mmol, 1 equiv.) was dissolved in ice cooled DCM. The reaction was stirred continuously for 10 mins, and then MeOTf (137  $\mu$ l, 1.25 mmol, 1.25 equiv.) was added. The reaction was continued at room temperature for 1 hr. Progression of the reaction was monitored by TLC. The product was washed thoroughly with diethyl ether to give the desired product as white powder.

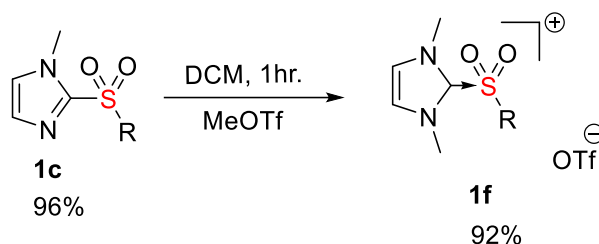

Scheme S6. Synthetic reaction scheme for the *N*-methylation of sulfones

### 1,3-dimethyl-2-((2-chloro-4-fluorobenzyl)sulfonyl)-1H-imidazol-3-ium Triflate (1f)

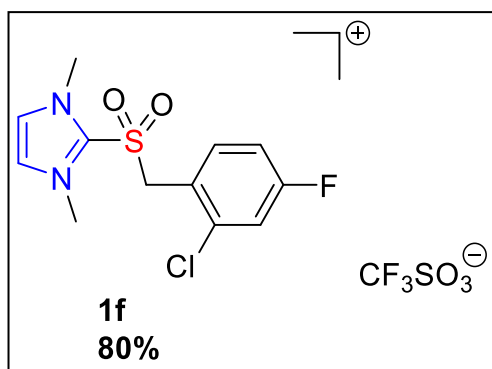

The title compound was isolated by successive Diethyl ether wash; Yield: 80 % (360 mgs), white solid, m.p. 142-144 °C;  $^1\text{H}$  NMR (600MHz,  $\text{CD}_3\text{OD}$ )  $\delta$  7.93 (s, 2H), 7.65 (dd,  $J = 8.7, 5.8$  Hz, 1H), 7.39 (dd,  $J = 8.5, 2.6$  Hz, 1H), 7.28 (td,  $J = 8.3, 2.6$  Hz, 1H), 5.28 (s, 2H), 3.92 (s, 6H);  $^{13}\text{C}\{^1\text{H}\}$  NMR (151 MHz,  $\text{CD}_3\text{OD}$ ):  $\delta$  165.05 (d,  $^1J_{\text{C-F}} = 254.0$  Hz), 137.63 (d,  $^3J_{\text{C-F}} = 10.7$  Hz), 137.38, 137.13 (d,  $^3J_{\text{C-F}} = 9.2$  Hz), 128.92, 122.88, 121.48, 120.77, 118.81 (d,  $^2J_{\text{C-F}} = 25.6$  Hz), 116.84 (d,  $^2J_{\text{C-F}} = 20.9$  Hz), 60.02, 38.98;  $^{19}\text{F}$ -NMR

(600 MHz,  $\text{DMSO-}d_6$ )  $\delta = -107.77$ ; HRMS (ESI-TOF)  $m/z$  Calcd for  $\text{C}_{12}\text{H}_{13}\text{ClFN}_2\text{O}_2\text{S}^+ [\text{M}^+]$  303.0365 found 303.0384.

### 1,3-dimethyl-2-(benzylsulfonyl)-1H-imidazol-3-ium Triflate (2f)

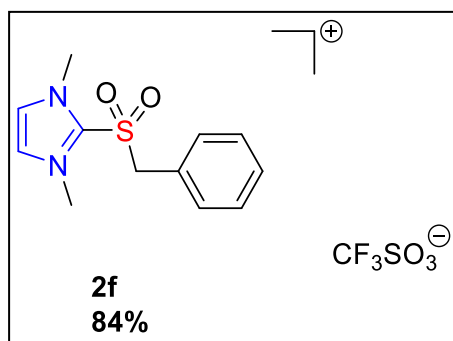

The title compound was isolated by successive Diethyl ether wash; Yield: 84 % (336 mgs), white solid, m.p. 132-134 °C;  $^1\text{H}$  NMR (600MHz,  $\text{CD}_3\text{OD}$ )  $\delta$  7.85 (s, 2H), 7.53 – 7.49 (m, 1H), 7.45 – 7.42 (m, 2H), 7.25 (d,  $J = 7.5$  Hz, 2H), 5.08 (s, 2H), 3.80 (s, 6H);  $^{13}\text{C}\{^1\text{H}\}$  NMR (151 MHz,  $\text{CD}_3\text{OD}$ ):  $\delta$  137.50, 132.54, 131.44, 130.61, 128.36, 126.98, 122.89, 63.71, 38.87; HRMS (ESI-TOF)  $m/z$  Calcd for  $\text{C}_{12}\text{H}_{15}\text{N}_2\text{O}_2\text{S}^+ [\text{M}^+]$  251.0849 found 251.0864.

### 1,3-dimethyl-2-((4-bromobenzyl)sulfonyl)-1H-imidazol-3-ium Triflate (3f)

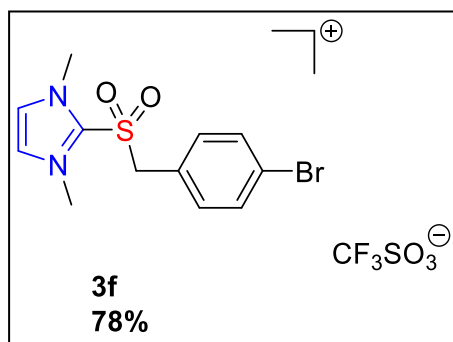

The title compound was isolated by successive Diethyl ether wash; Yield: 78 % (372 mg), white solid, m.p. 152-154 °C;  $^1\text{H}$  NMR (600MHz,  $\text{DMSO-}d_6$ )  $\delta$  8.08 (s, 2H), 7.68 (d,  $J = 7.9$  Hz, 2H), 7.26 (d,  $J = 7.9$  Hz, 2H), 5.30 (s, 2H), 3.82 (s, 6H);  $^{13}\text{C}\{^1\text{H}\}$  NMR (151 MHz,  $\text{DMSO-}d_6$ ):  $\delta$  134.90, 133.55, 132.19, 127.30, 124.93, 123.61, 60.90, 38.04; HRMS (ESI-TOF)  $m/z$  Calcd for  $\text{C}_{12}\text{H}_{14}^{79}\text{BrN}_2\text{O}_2\text{S}^+ [\text{M}^+]$  328.9954 found 328.9971;  $m/z$  Calcd for  $\text{C}_{12}\text{H}_{14}^{81}\text{BrN}_2\text{O}_2\text{S}^+ [\text{M}^+]$  330.9936 found

330.9950.

### 1,3-dimethyl-2-((2-fluoro-4-bromobenzyl)sulfonyl)-1H-imidazol-3-ium Triflate (4f)

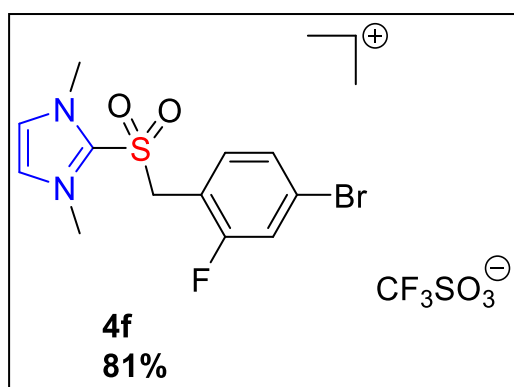

The title compound was isolated by successive Diethyl ether wash; Yield: 81 % (400 mgs), white solid, m.p. 136-198 °C;  $^1\text{H}$  NMR (600MHz,  $\text{DMSO-}d_6$ )  $\delta$  8.12 (s, 2H), 7.74 (d,  $J = 8.3$  Hz, 1H), 7.58 (d,  $J = 6.8$  Hz, 1H), 7.37 (t,  $J = 8.0$  Hz, 1H), 5.40 (s, 2H), 3.89 (s, 6H);  $^{13}\text{C}\{^1\text{H}\}$  NMR (151 MHz,  $\text{DMSO-}d_6$ ):  $\delta$  160.98 (d,  $^1J_{\text{C-F}} = 254.6$  Hz), 134.96 (d,  $^2J_{\text{C-F}} = 18.5$  Hz), 128.69, 127.49, 124.41, 119.57 (d,  $^2J_{\text{C-F}} = 32.6$  Hz), 112.47 (d,  $^3J_{\text{C-F}} = 14.9$  Hz), 55.35, 38.08;  $^{19}\text{F}$ -NMR (600 MHz,  $\text{DMSO-}d_6$ )  $\delta = -114.79$ ; HRMS (ESI-TOF)  $m/z$  Calcd for  $\text{C}_{12}\text{H}_{13}^{79}\text{BrFN}_2\text{O}_2\text{S}^+ [\text{M}^+]$  346.9860 found 346.9881;  $m/z$  Calcd for  $\text{C}_{12}\text{H}_{13}^{81}\text{BrFN}_2\text{O}_2\text{S}^+ [\text{M}^+]$  348.9850 found 348.9861.

### 1,3-dimethyl-2-((4-(trifluoromethoxy)benzyl)sulfonyl)-1H-imidazol-3-ium Triflate (5f)

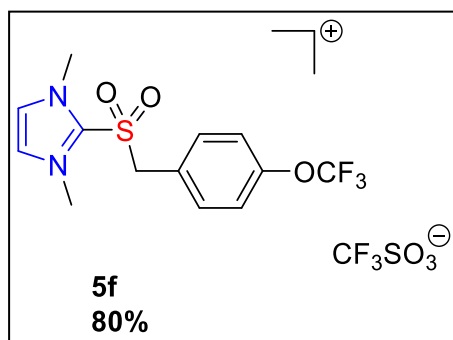

The title compound was isolated by successive Diethyl ether wash; Yield: 80 % (387 mgs), white solid, m.p. 178-180 °C;  $^1\text{H}$  NMR (600MHz,  $\text{DMSO-}d_6$ )  $\delta$  8.12 – 8.04 (m, 2H), 7.50 – 7.44 (m, 4H), 5.36 (s, 2H), 3.82 (s, 6H);  $^{13}\text{C}\{^1\text{H}\}$  NMR (151 MHz,  $\text{DMSO-}d_6$ ): 149.37, 134.90, 133.65, 127.34, 125.00, 121.67, 60.69, 38.00;  $^{19}\text{F}$ -NMR (600 MHz,  $\text{DMSO-}d_6$ )  $\delta = -52.19$ ; HRMS (ESI-TOF)  $m/z$  Calcd for  $\text{C}_{13}\text{H}_{14}\text{F}_3\text{N}_2\text{O}_3\text{S}^+ [\text{M}^+]$  335.0672 found 335.0689.

### 1,3-dimethyl-2-((4-(tert-butyl)benzyl)sulfonyl)-1H-imidazol-3-ium Triflate (6f)

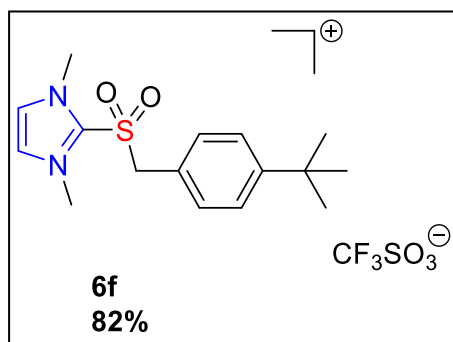

The title compound was isolated by successive Diethyl ether wash; Yield: 82 % (374 mgs), white solid, m.p. 172-174 °C;  $^1\text{H}$  NMR (600MHz, DMSO- $d_6$ )  $\delta$  8.05 (s, 2H), 7.44 (d,  $J$  = 8.0 Hz, 2H), 7.16 (d,  $J$  = 8.0 Hz, 2H), 5.26 (s, 2H), 3.73 (s, 6H);  $^{13}\text{C}\{^1\text{H}\}$  NMR (151 MHz, DMSO- $d_6$ ):  $\delta$  152.78, 135.02, 131.14, 127.09, 125.86, 122.49, 61.41, 37.78, 34.51, 30.93; HRMS (ESI-TOF) m/z Calcd for  $\text{C}_{16}\text{H}_{23}\text{N}_2\text{O}_2\text{S}^+$  [ $\text{M}^+$ ] 307.1475 found 307.1496.

### 1,3-dimethyl-2-((3-(trifluoromethyl)benzyl)sulfonyl)-1H-imidazol-3-ium Triflate (7f)

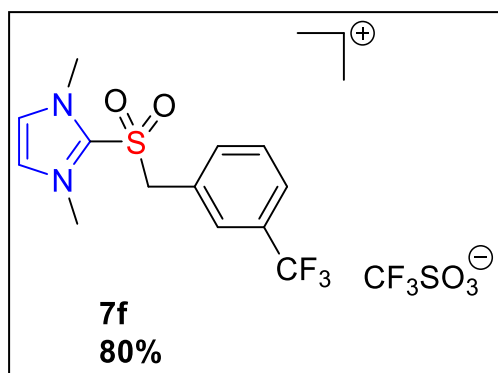

The title compound was isolated by successive Diethyl ether wash; Yield: 80 % (375 mgs), white solid, m.p. 152-154 °C;  $^1\text{H}$  NMR (600MHz, DMSO- $d_6$ )  $\delta$  8.10 (s, 2H), 7.90 (d,  $J$  = 7.0 Hz, 1H), 7.74 – 7.70 (m, 2H), 7.67 (s, 1H), 5.41 (s, 2H), 3.82 (s, 6H);  $^{13}\text{C}\{^1\text{H}\}$  NMR (151 MHz, DMSO- $d_6$ ):  $\delta$  135.86, 134.81, 130.38, 129.84, 129.62, 127.99, 127.34, 127.06, 126.53, 60.88, 38.05;  $^{19}\text{F}$ -NMR (600 MHz, DMSO- $d_6$ )  $\delta$  = -56.76; HRMS (ESI-TOF) m/z Calcd for  $\text{C}_{13}\text{H}_{14}\text{F}_3\text{N}_2\text{O}_2\text{S}^+$  [ $\text{M}^+$ ] 319.0723 found 319.0507.

### 1,3-dimethyl-2-((4-nitrobenzyl)sulfonyl)-1H-imidazol-3-ium Triflate (8f)

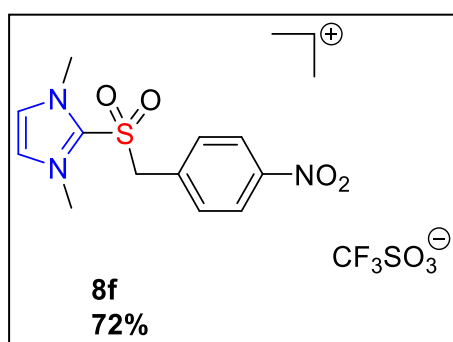

The title compound was isolated by successive Diethyl ether wash; Yield: 72 % (320 mgs), white solid, m.p. 184-186 °C;  $^1\text{H}$  NMR (600MHz, DMSO- $d_6$ )  $\delta$  8.32 (d,  $J$  = 8.4 Hz, 2H), 8.09 (s, 2H), 7.63 (d,  $J$  = 8.3 Hz, 2H), 5.50 (s, 2H), 3.86 (s, 6H);  $^{13}\text{C}\{^1\text{H}\}$  NMR (151 MHz, DMSO- $d_6$ ):  $\delta$  148.34, 134.82, 132.93, 132.72, 127.46, 124.15, 60.83, 38.20; HRMS (ESI-TOF) m/z Calcd for  $\text{C}_{12}\text{H}_{14}\text{N}_3\text{O}_4\text{S}^+$  [ $\text{M}^+$ ] 296.0700 found 296.0718.

### 3. Spectra

#### 2-((2-chloro-4-fluorobenzyl)thio)-1-methyl-1H-imidazole (**1a**)

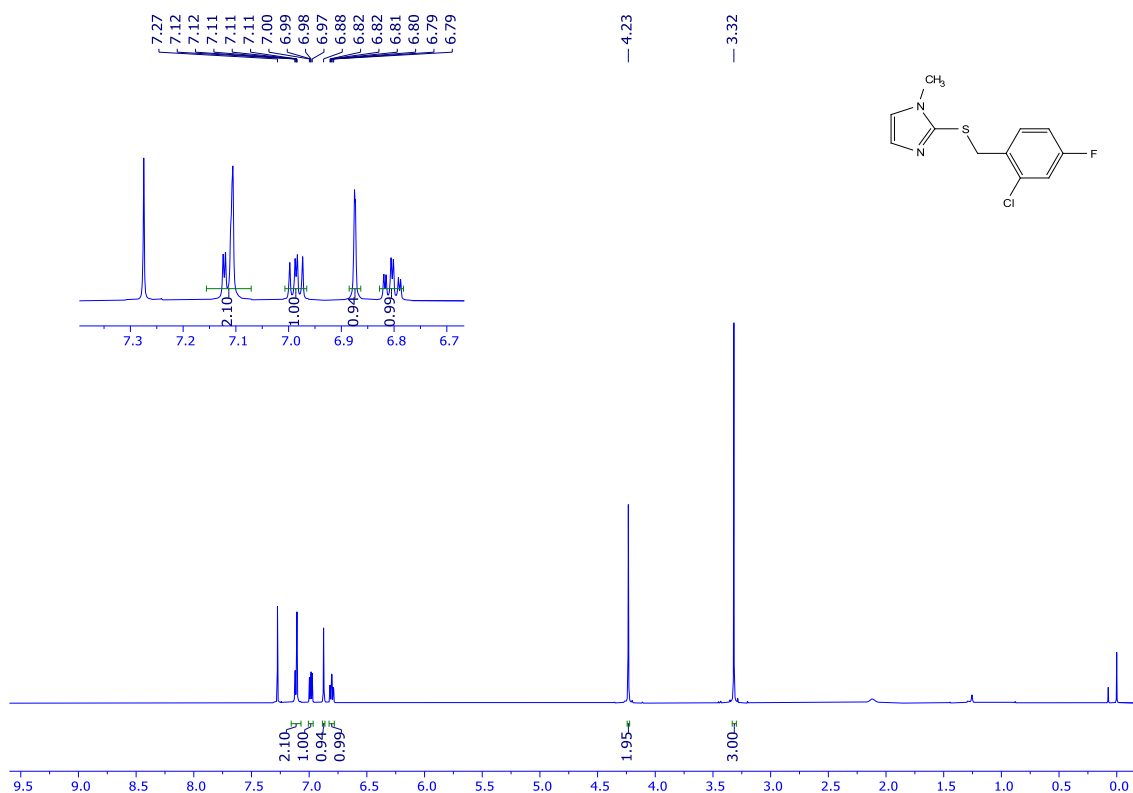

Fig. S1.  $^1\text{H}$  NMR spectrum of compound **1a** ( $\text{CDCl}_3$ , 600 MHz)

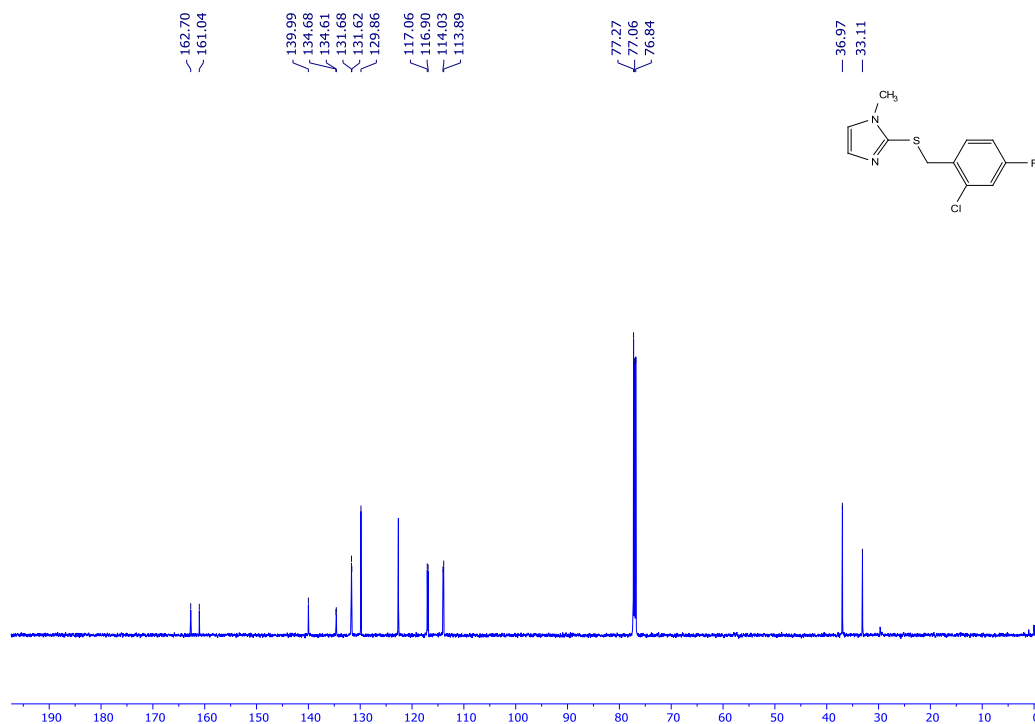

Fig. S2.  $^{13}\text{C}$  NMR spectrum of compound **1a** ( $\text{CDCl}_3$ , 600 MHz)

## 2-(benzylthio)-1-methyl-1H-imidazole (2a)

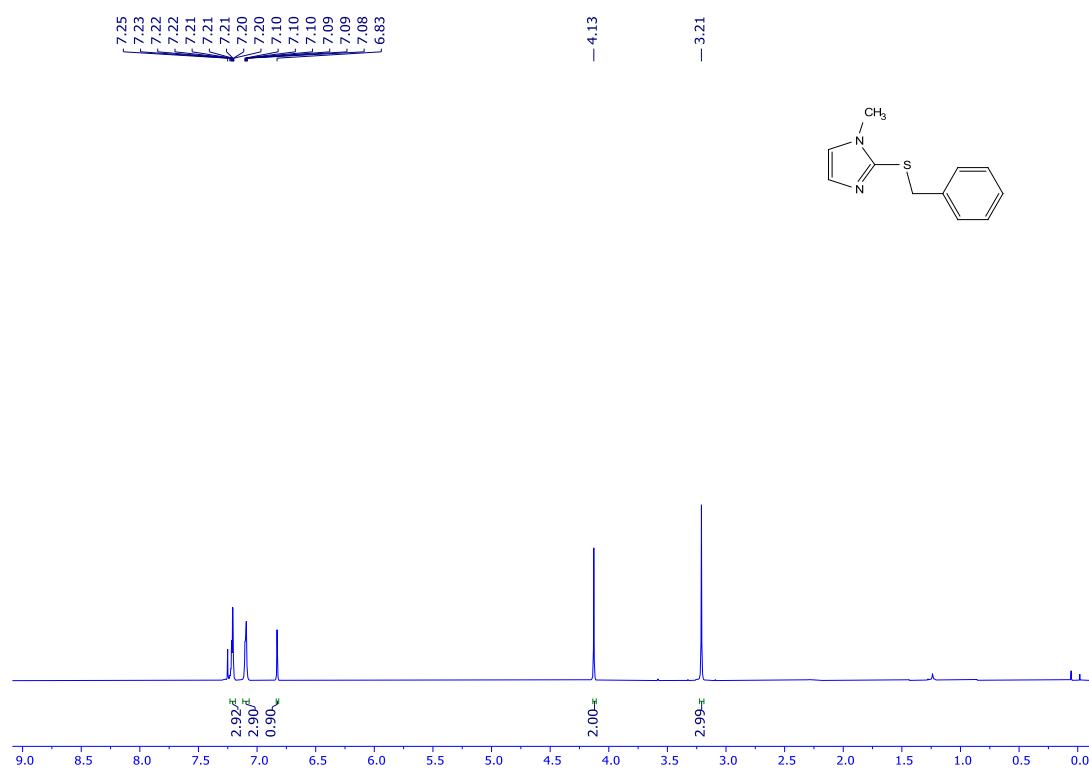

Fig. S3.  $^1\text{H}$  NMR spectrum of compound **2a** ( $\text{CDCl}_3$ , 600 MHz)

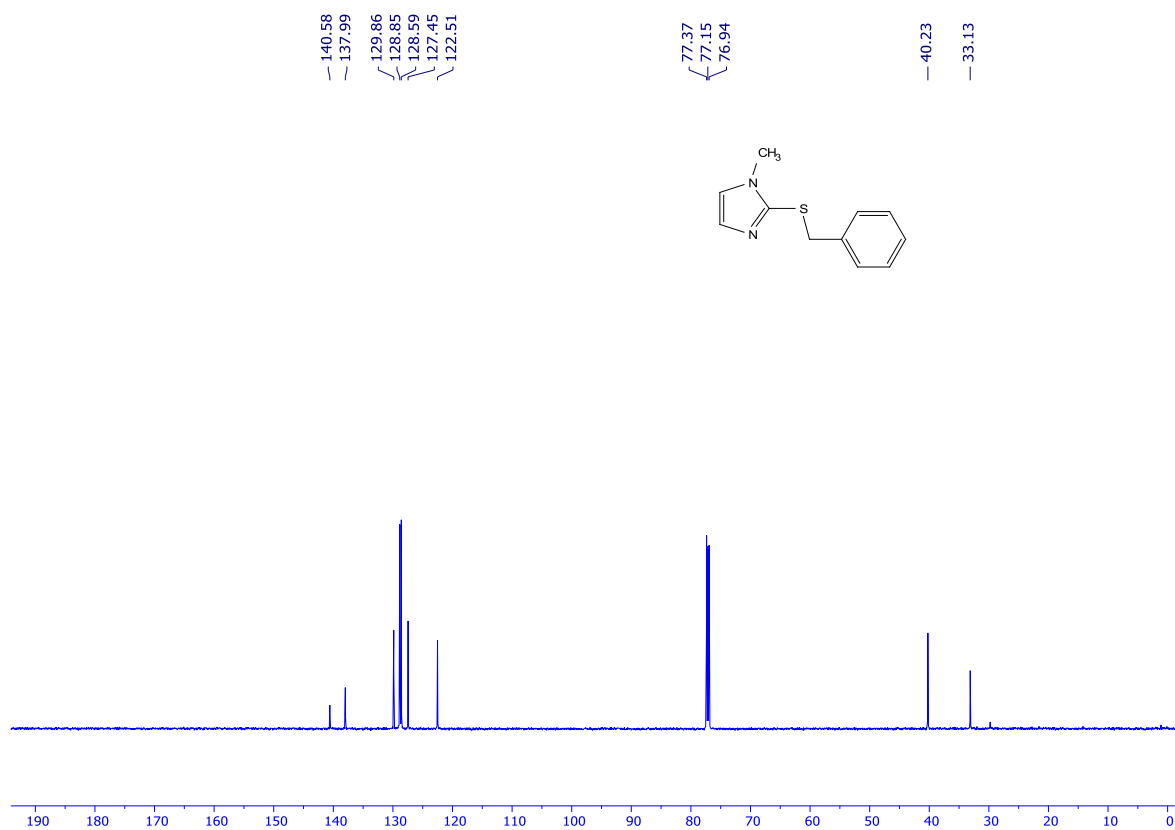

Fig. S4.  $^{13}\text{C}$  NMR spectrum of compound **2a** ( $\text{CDCl}_3$ , 600 MHz)



## 2-((4-bromobenzyl)thio)-1-methyl-1H-imidazole (3a)

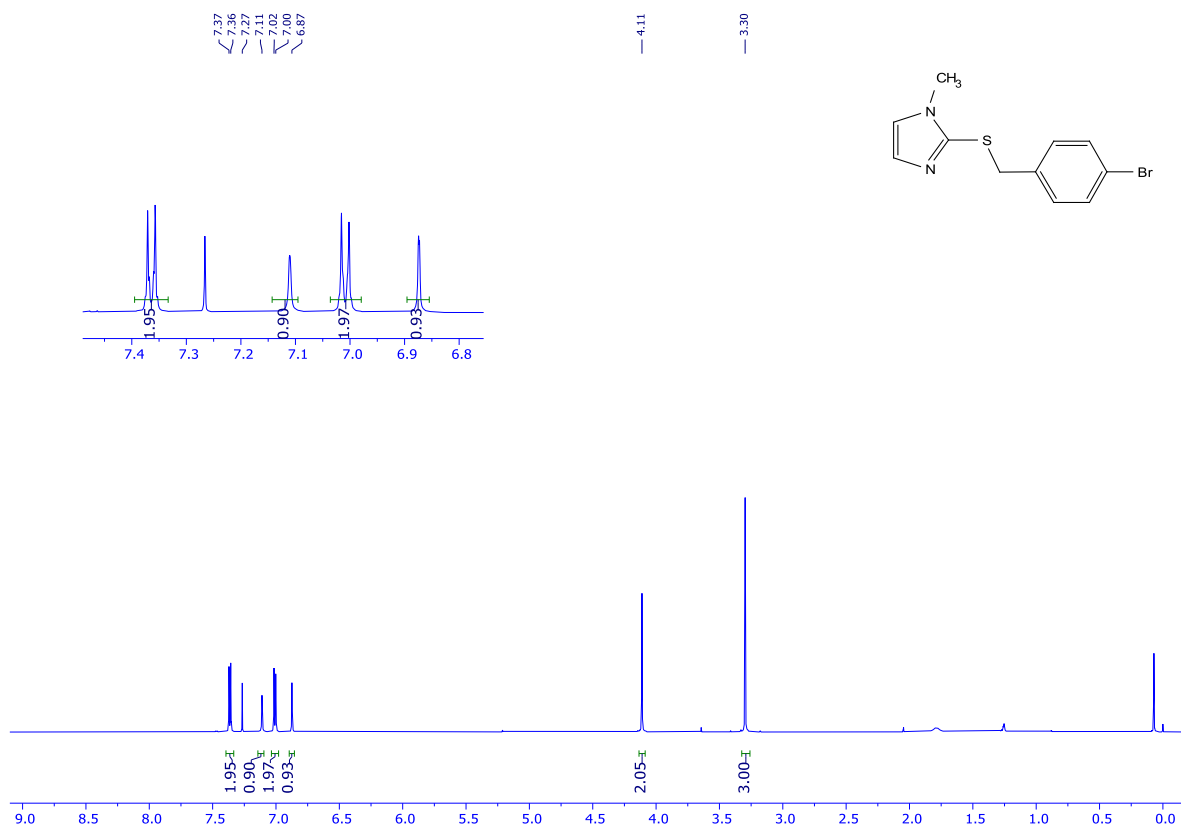

Fig. S5. <sup>1</sup>H NMR spectrum of compound **3a** (CDCl<sub>3</sub>, 600 MHz)

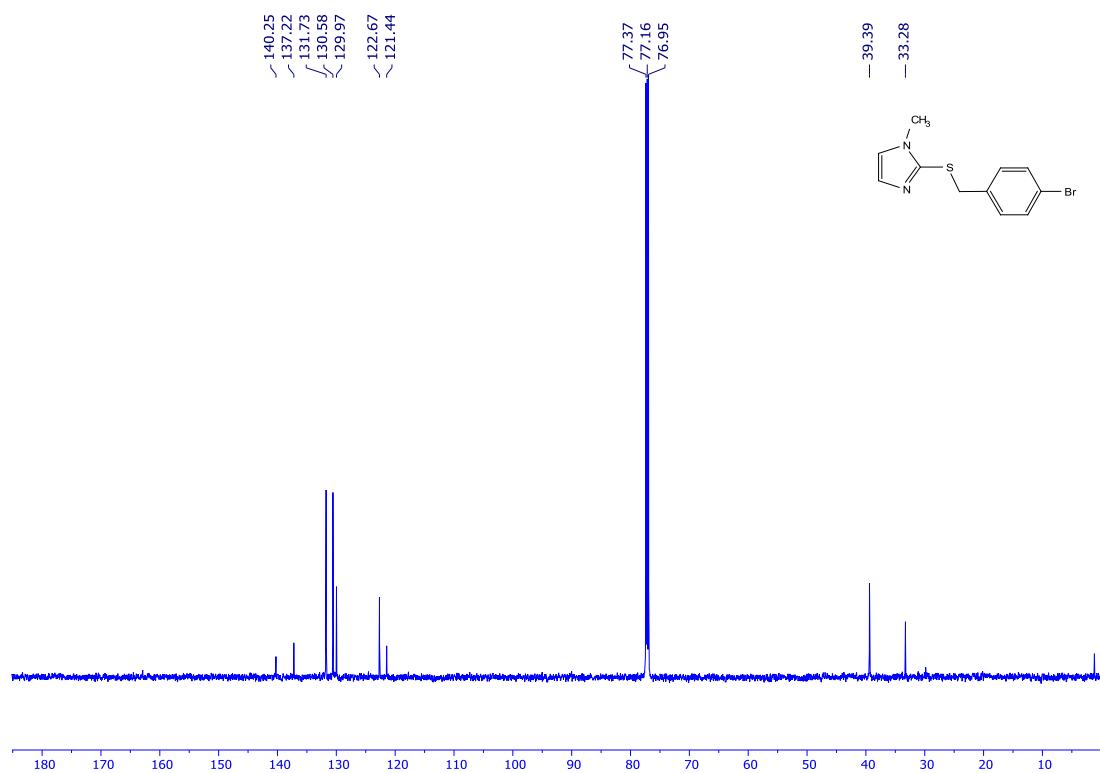

Fig. S6. <sup>13</sup>C NMR spectrum of compound **3a** (CDCl<sub>3</sub>, 600 MHz)

## 2-((4-bromo-2-fluorobenzyl)thio)-1-methyl-1H-imidazole (4a)

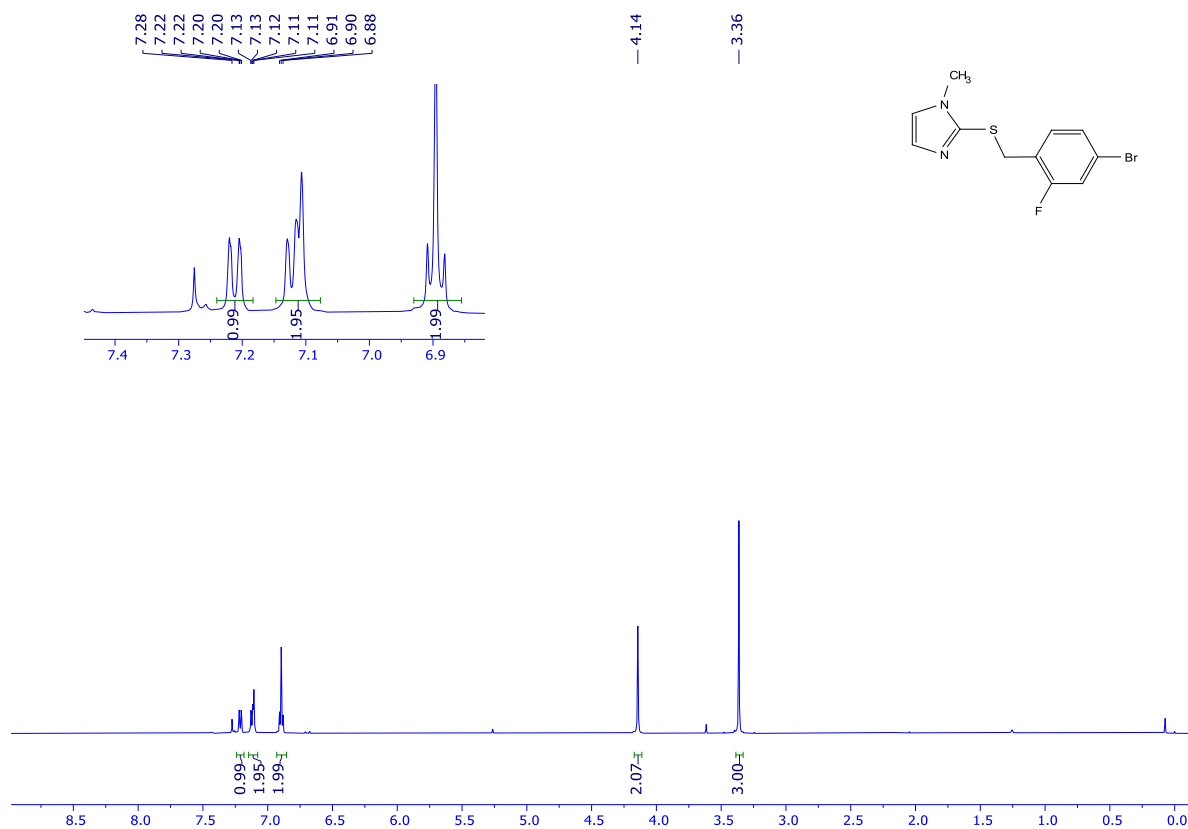

Fig. S7. <sup>1</sup>H NMR spectrum of compound **4a** (CDCl<sub>3</sub>, 600 MHz)

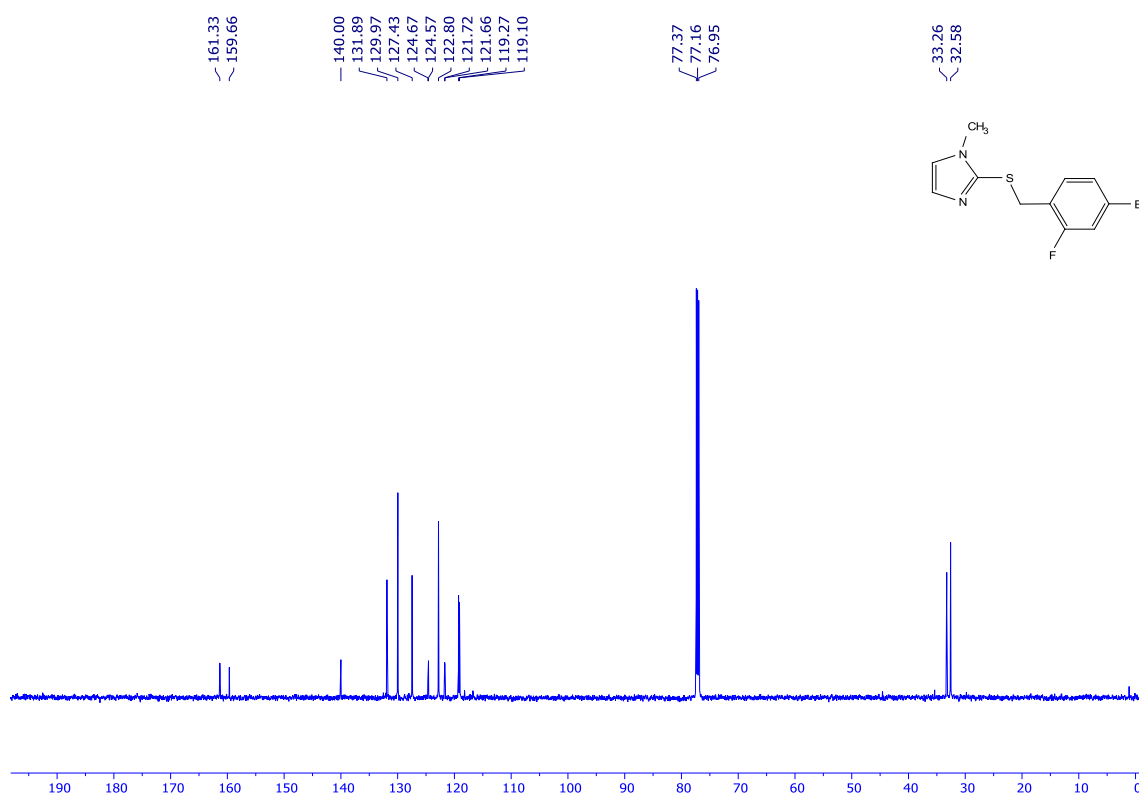

Fig. S8. <sup>13</sup>C NMR spectrum of compound **4a** (CDCl<sub>3</sub>, 600 MHz)

# 1-methyl-2-((4-(trifluoromethoxy)benzyl)thio)-1H-imidazole (5a)

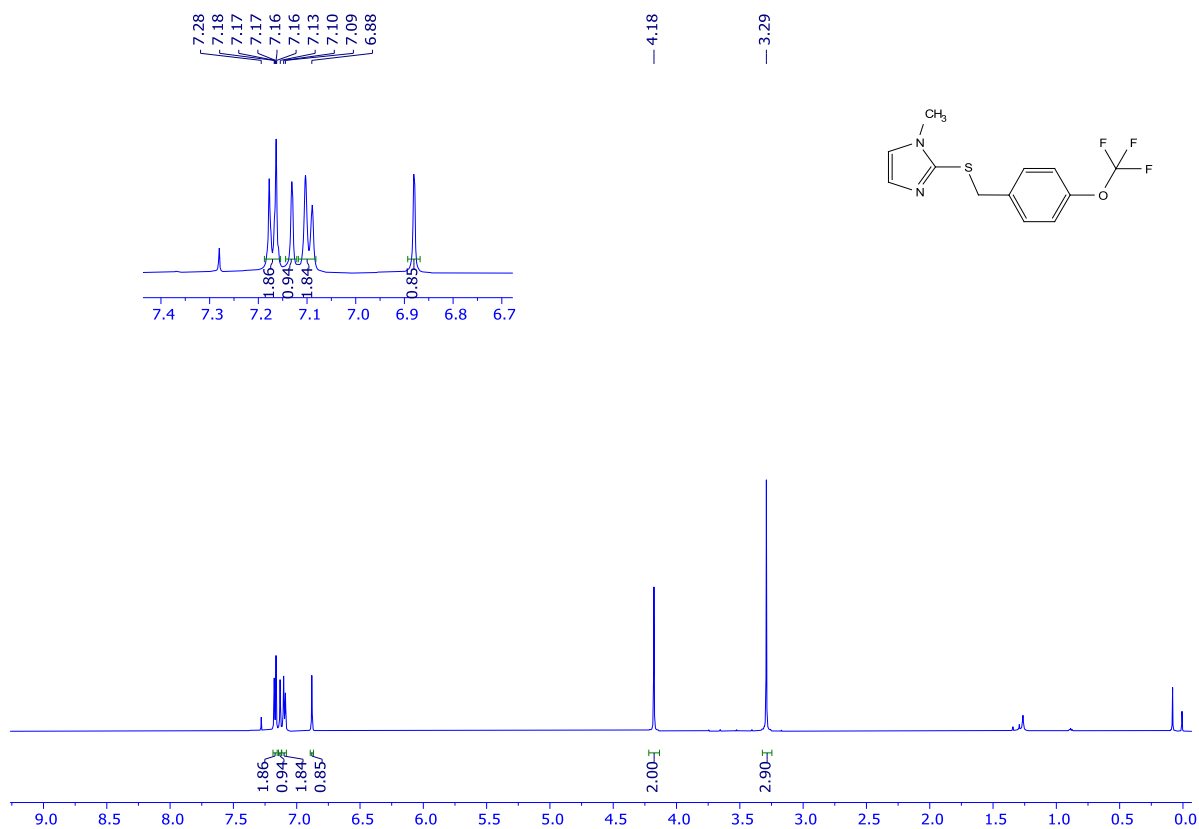

Fig. S9. <sup>1</sup>H NMR spectrum of compound 5a (CDCl<sub>3</sub>, 600 MHz)

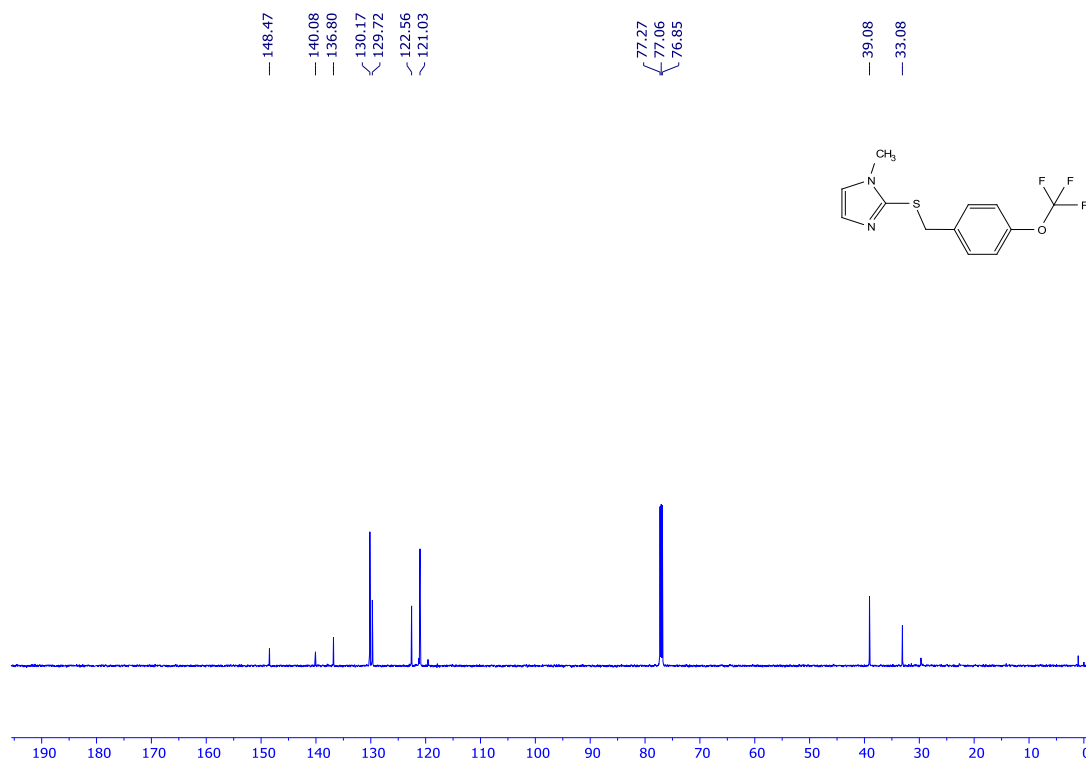

Fig. S10. <sup>13</sup>C NMR spectrum of compound 5a (CDCl<sub>3</sub>, 600 MHz)

## 2-((4-(tert-butyl)benzyl)thio)-1-methyl-1H-imidazole (6a)

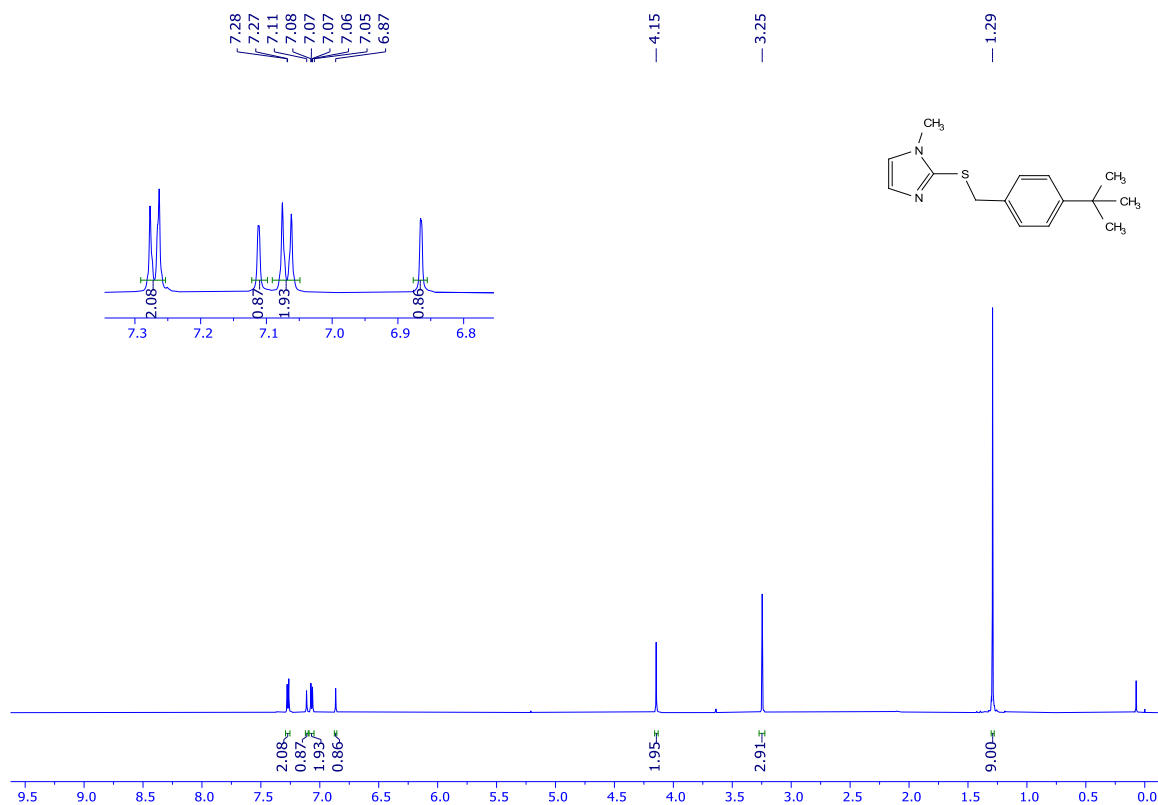

Fig. S11. <sup>1</sup>H NMR spectrum of compound **6a** (CDCl<sub>3</sub>, 600 MHz)

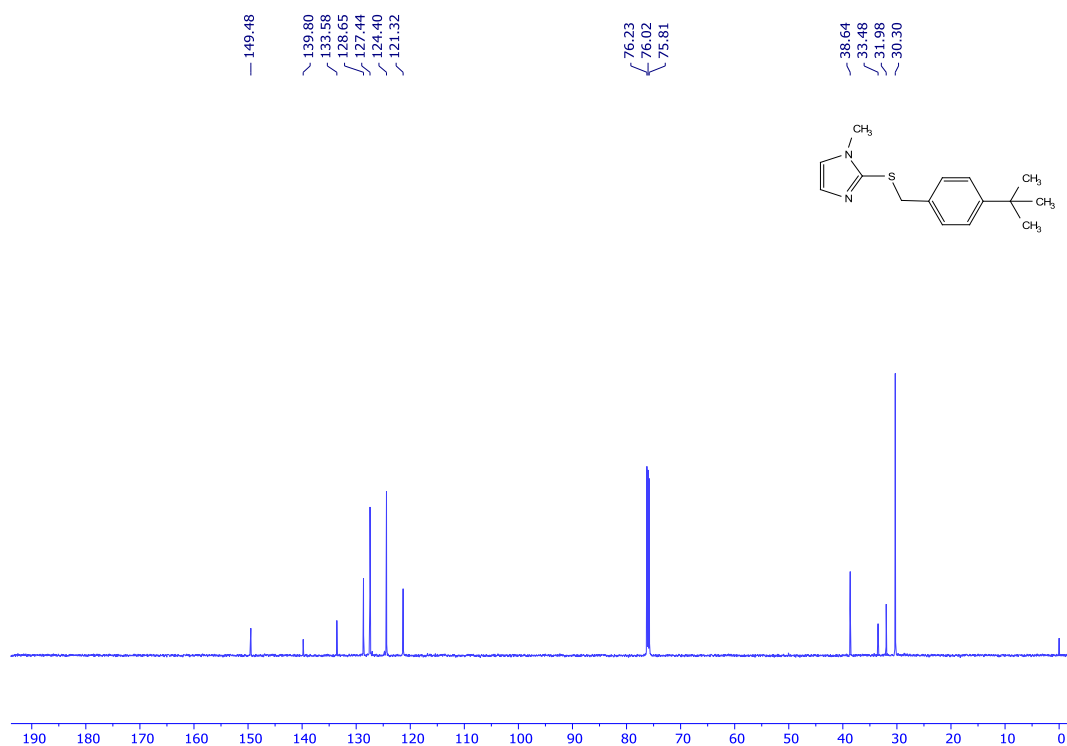

Fig. S12. <sup>13</sup>C NMR spectrum of compound **6a** (CDCl<sub>3</sub>, 600 MHz)

# 1-methyl-2-((4-nitrobenzyl)thio)-1H-imidazole (**8a**)

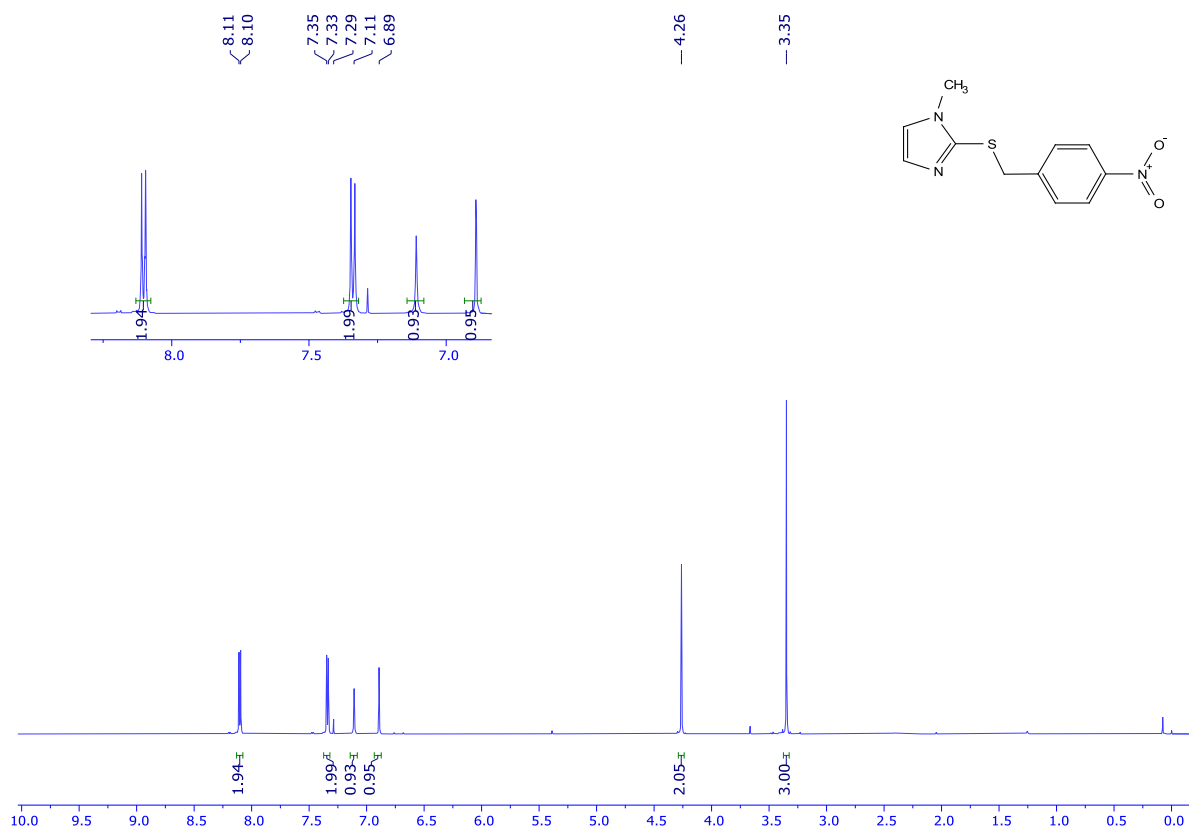

Fig. S13. <sup>1</sup>H NMR spectrum of compound **8a** (CDCl<sub>3</sub>, 600 MHz)

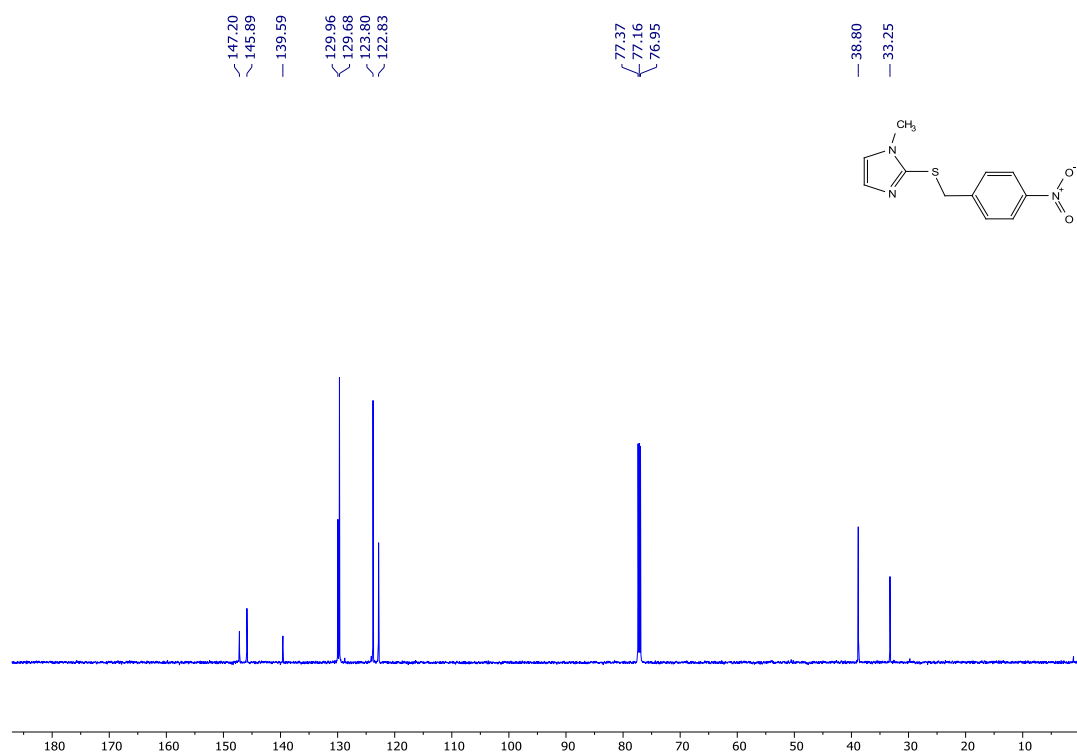

Fig. S14. <sup>13</sup>C NMR spectrum of compound **8a** (CDCl<sub>3</sub>, 600 MHz)

## 2-((2-chloro-4-fluorobenzyl)sulfinyl)-1-methyl-1H-imidazole (**1b**)

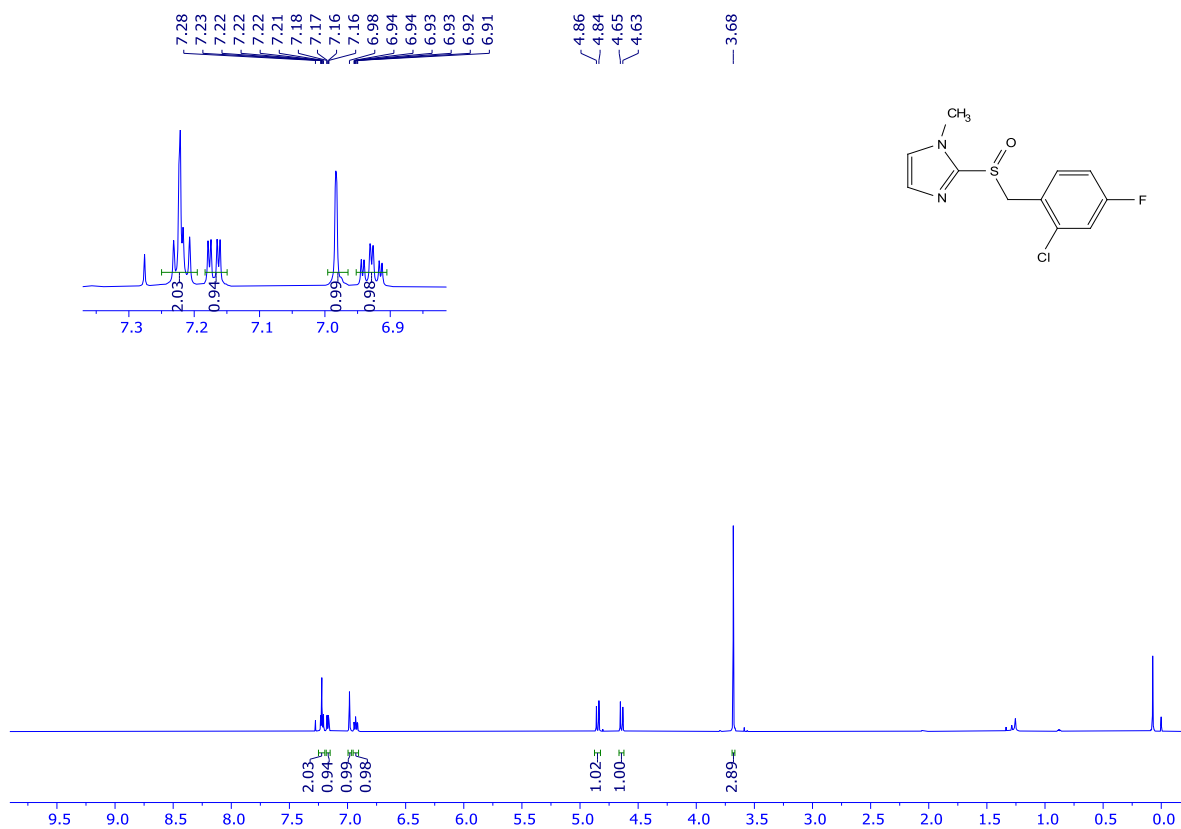

Fig. S15. <sup>1</sup>H NMR spectrum of compound **1b** (CDCl<sub>3</sub>, 600 MHz)

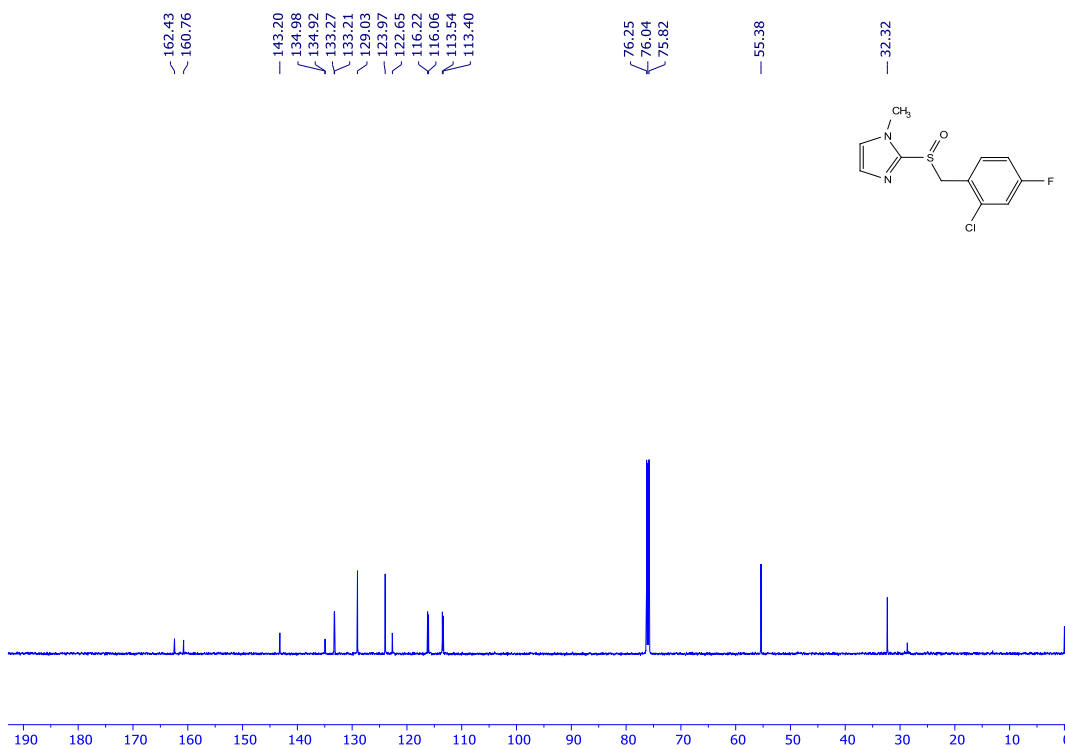

Fig. S16. <sup>13</sup>C NMR spectrum of compound **1b** (CDCl<sub>3</sub>, 600 MHz)

## 2-(benzylsulfinyl)-1-methyl-1H-imidazole (2b)

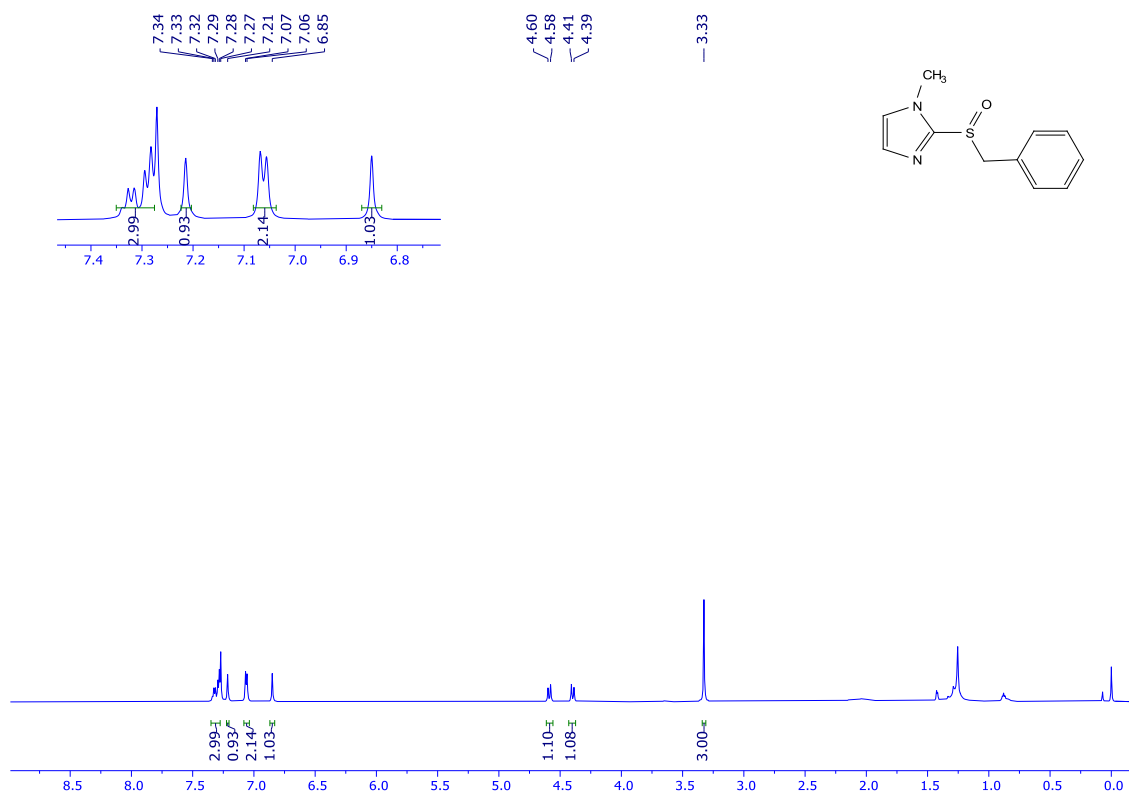

Fig. S17. <sup>1</sup>H NMR spectrum of compound **2b** (CDCl<sub>3</sub>, 600 MHz)

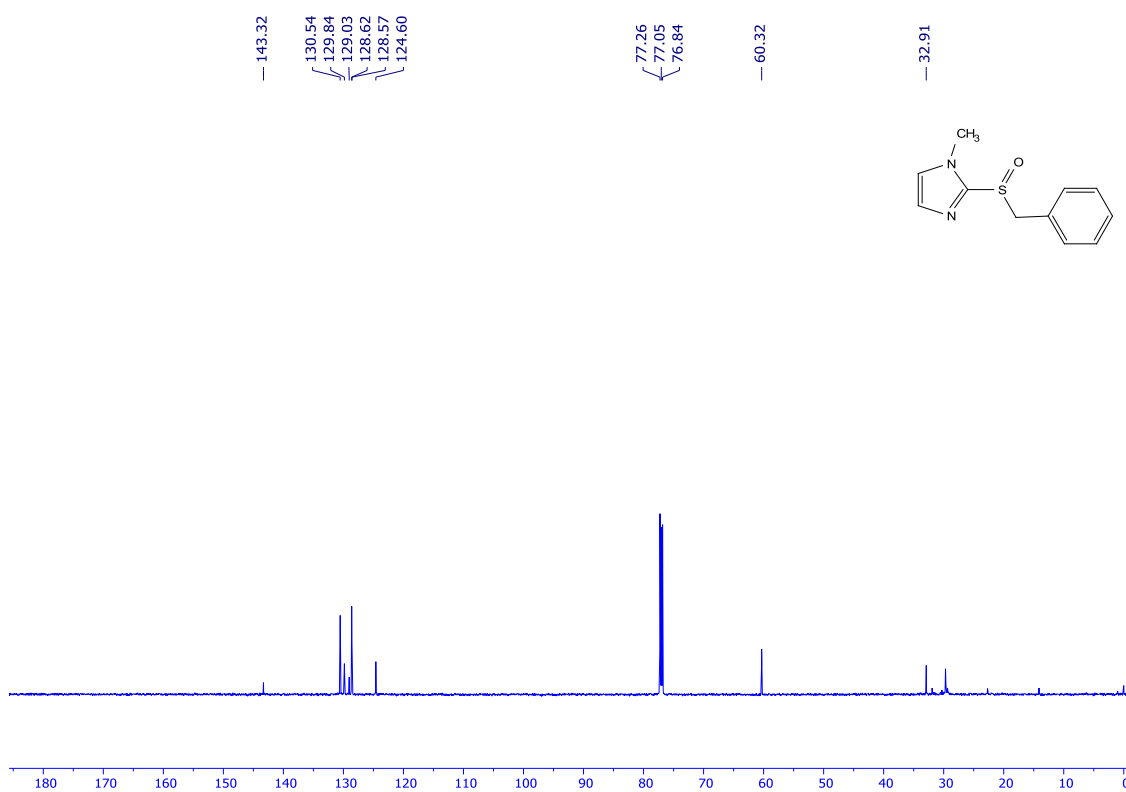

Fig. S18. <sup>13</sup>C NMR spectrum of compound **2b** (CDCl<sub>3</sub>, 600 MHz)

## 2-((4-bromobenzyl)sulfinyl)-1-methyl-1H-imidazole (3b)

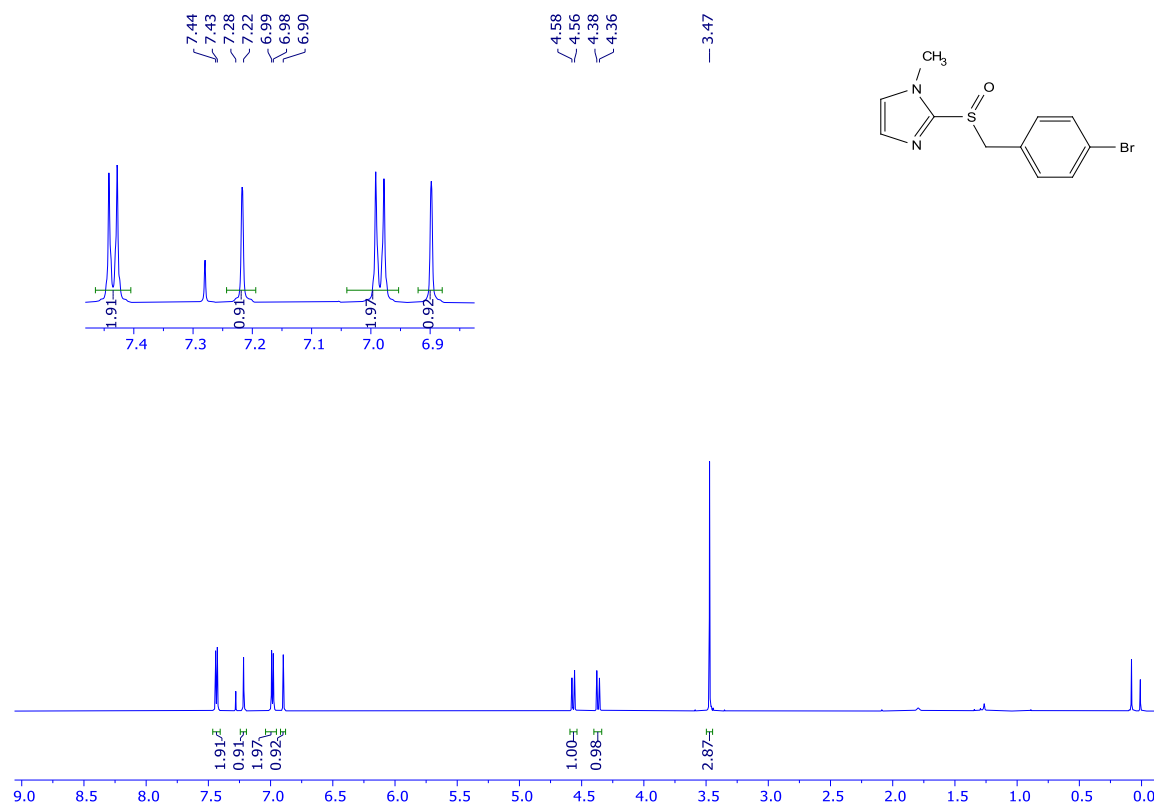

Fig. S19. <sup>1</sup>H NMR spectrum of compound **3b** (CDCl<sub>3</sub>, 600 MHz)

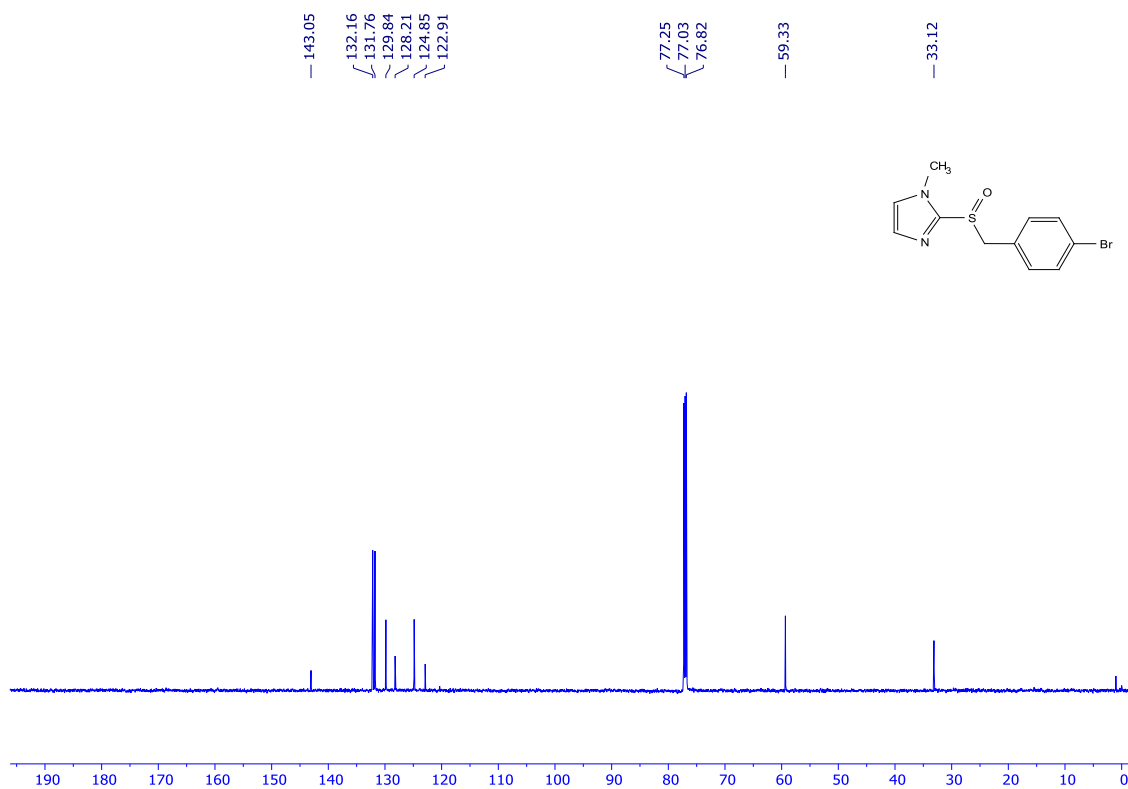

Fig. S20. <sup>13</sup>C NMR spectrum of compound **3b** (CDCl<sub>3</sub>, 600 MHz)



## 2-((4-bromo-2-fluorobenzyl)sulfinyl)-1-methyl-1H-imidazole (4b)

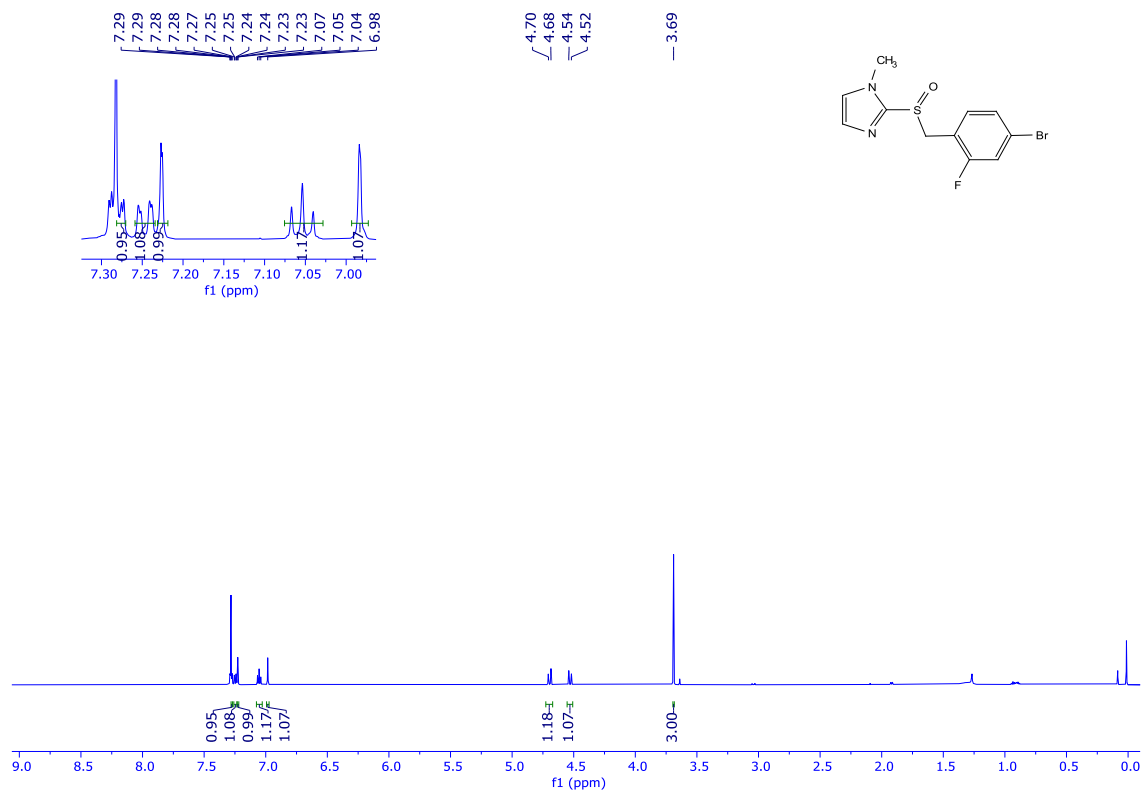

Fig. S21. <sup>1</sup>H NMR spectrum of compound **4b** (CDCl<sub>3</sub>, 600 MHz)

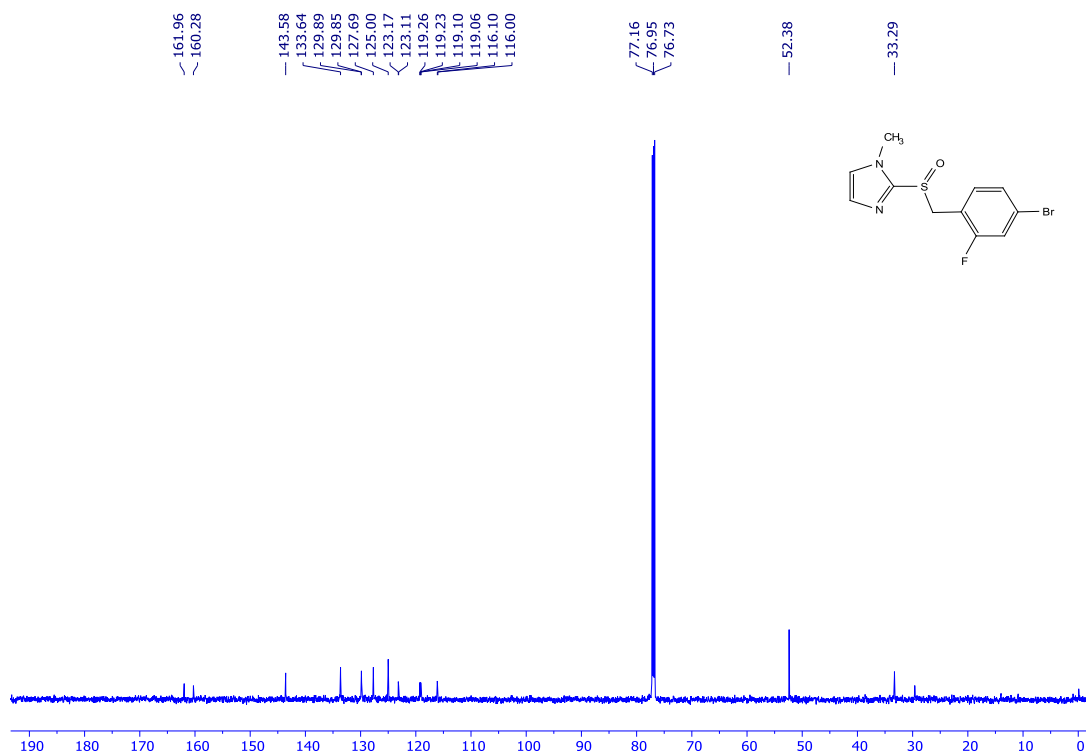

Fig. S22. <sup>13</sup>C NMR spectrum of compound **4b** (CDCl<sub>3</sub>, 600 MHz)

# 1-methyl-2-((4-(trifluoromethoxy)benzyl)sulfinyl)-1H-imidazole (5b)

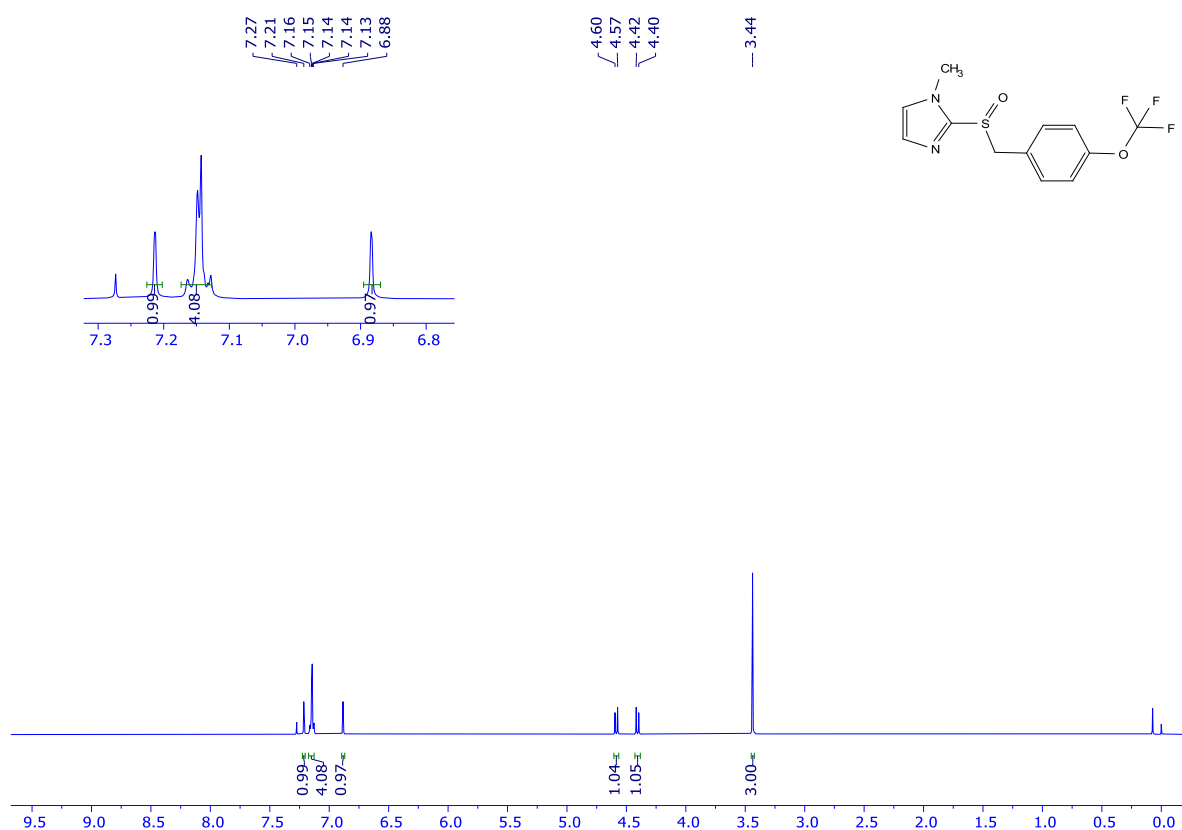

Fig. S23. <sup>1</sup>H NMR spectrum of compound **5b** (CDCl<sub>3</sub>, 600 MHz)

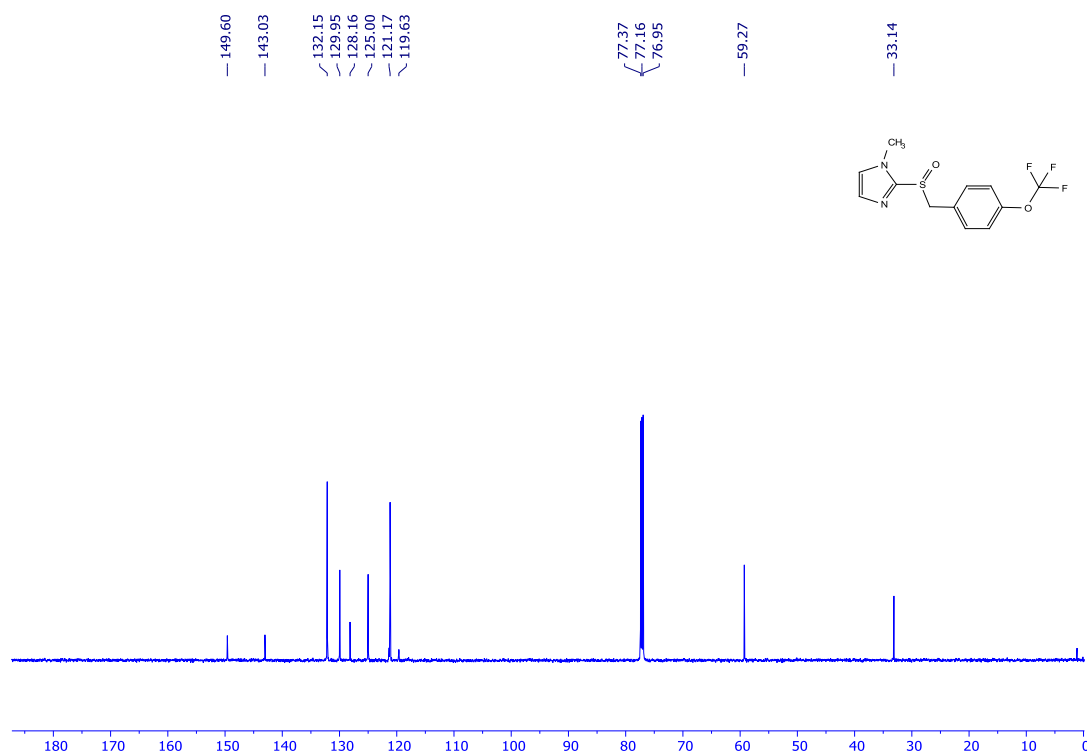

Fig. S24. <sup>13</sup>C NMR spectrum of compound **5b** (CDCl<sub>3</sub>, 600 MHz)

## 2-((4-(tert-butyl)benzyl)sulfinyl)-1-methyl-1H-imidazole (**6b**)

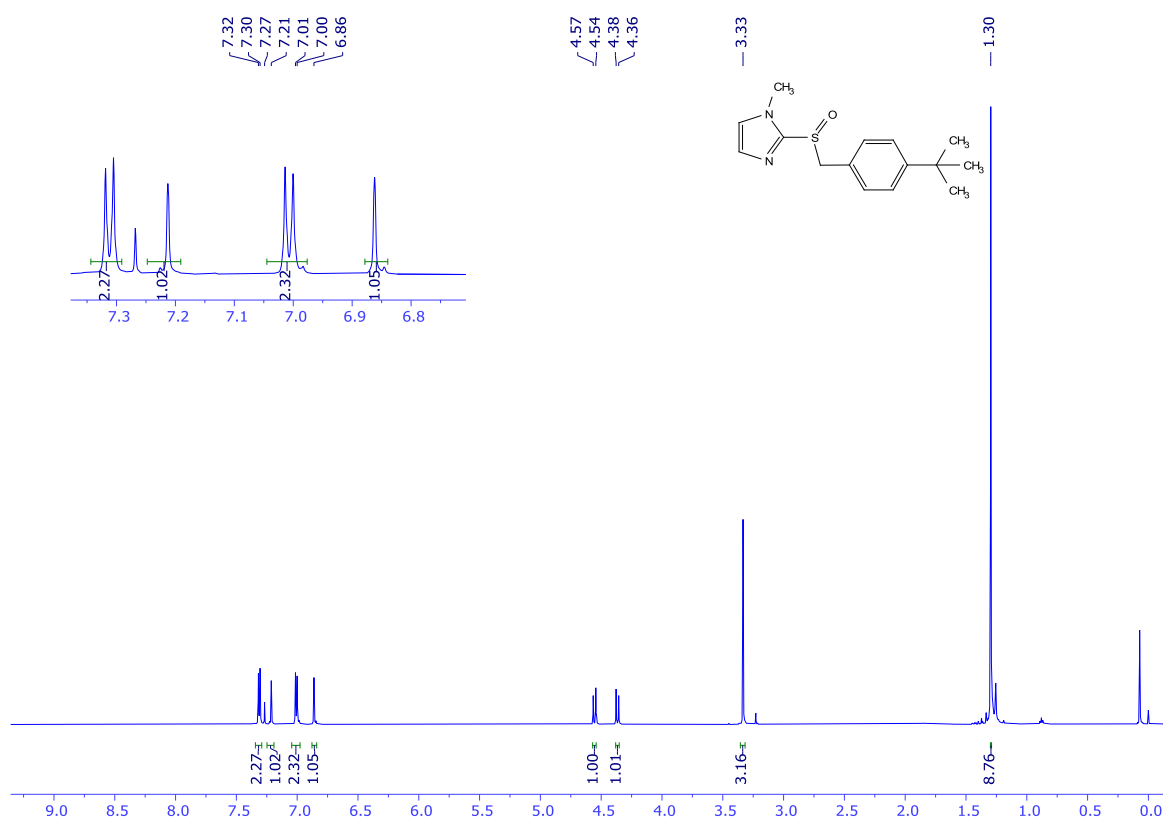

Fig. S25. <sup>1</sup>H NMR spectrum of compound **6b** (CDCl<sub>3</sub>, 600 MHz)

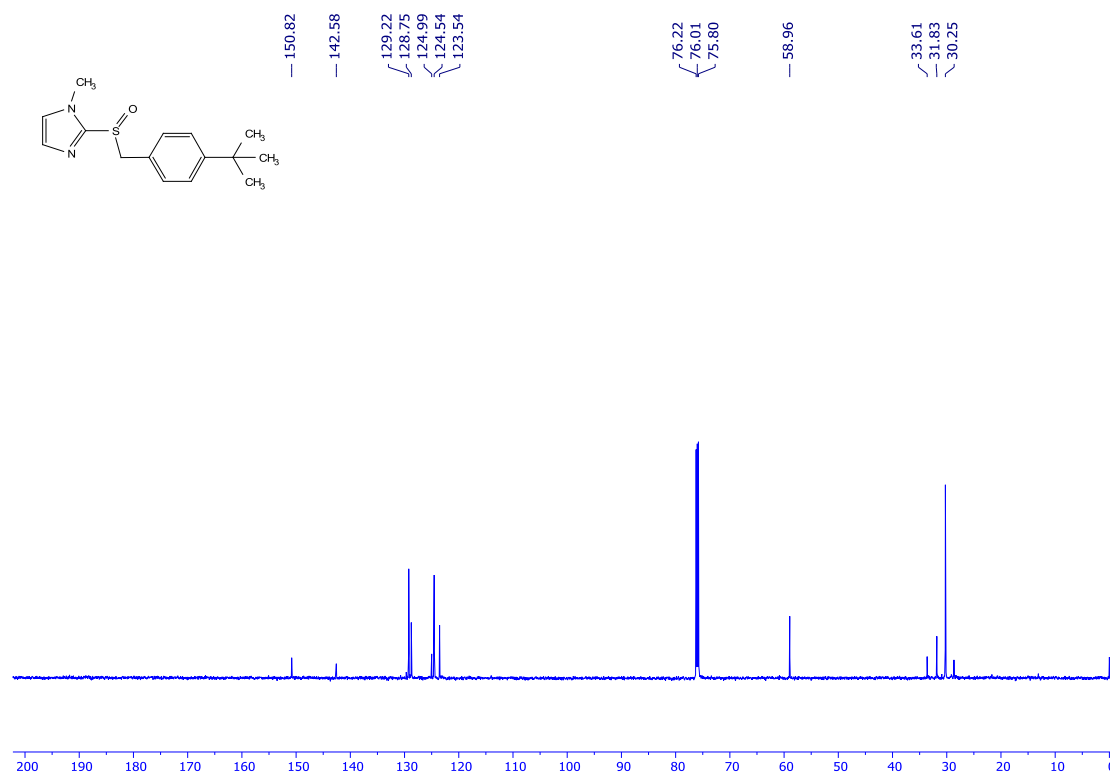

Fig. S26. <sup>13</sup>C NMR spectrum of compound **6b** (CDCl<sub>3</sub>, 600 MHz)

### 1-methyl-2-((3-(trifluoromethyl)benzyl)sulfinyl)-1H-imidazole (7b)

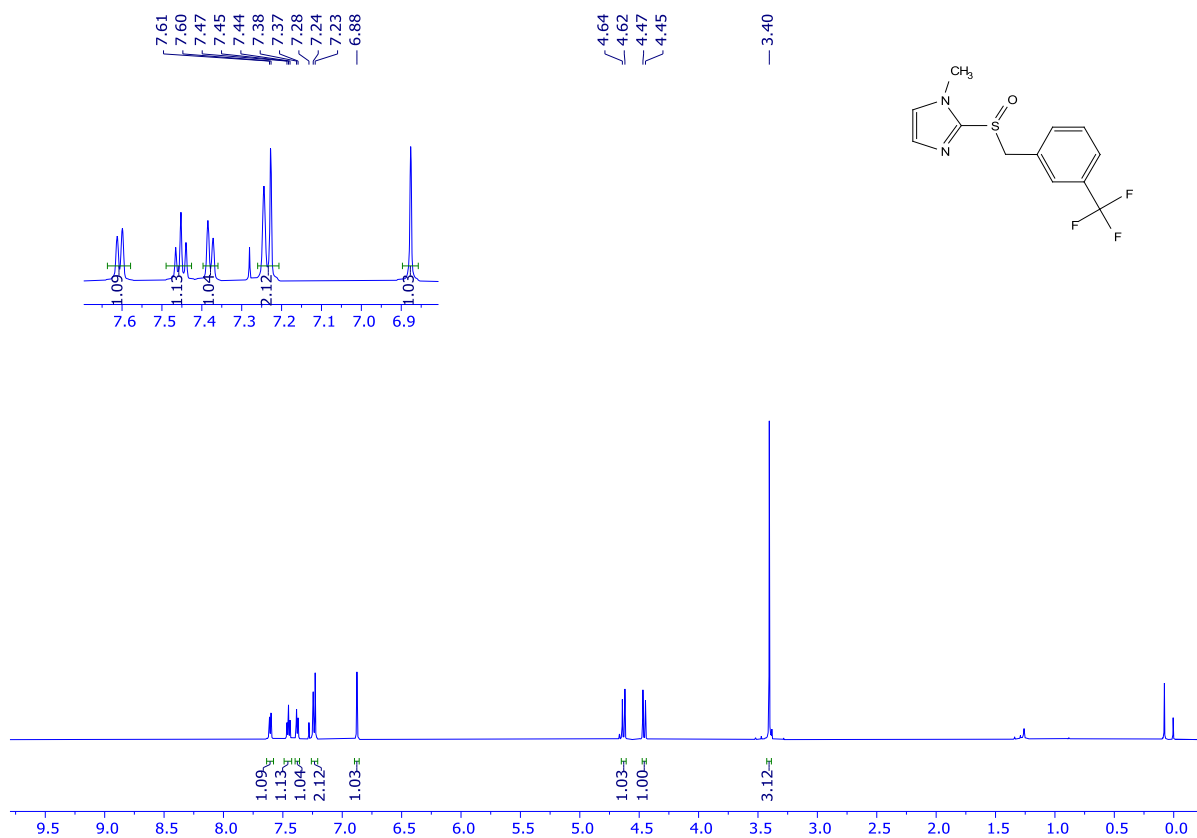

Fig. S27. <sup>1</sup>H NMR spectrum of compound **7b** (CDCl<sub>3</sub>, 600 MHz)

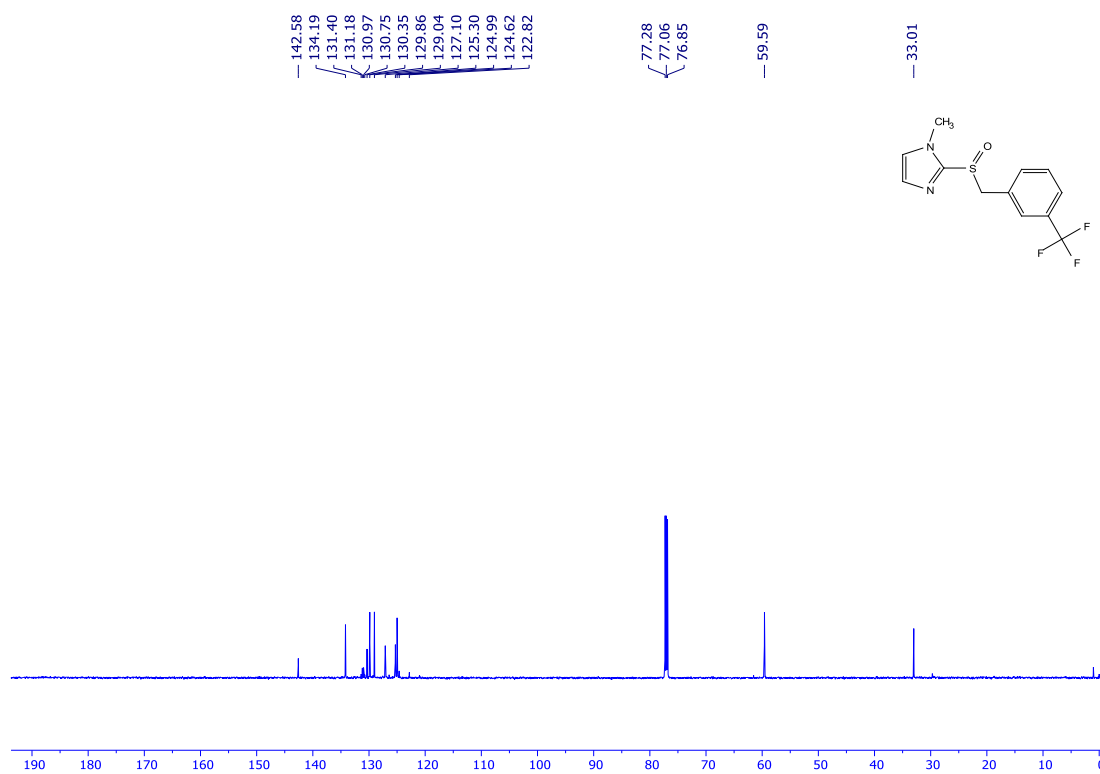

Fig. S28. <sup>13</sup>C NMR spectrum of compound **7b** (CDCl<sub>3</sub>, 600 MHz)

# 1-methyl-2-((4-nitrobenzyl)sulfinyl)-1H-imidazole (8b)

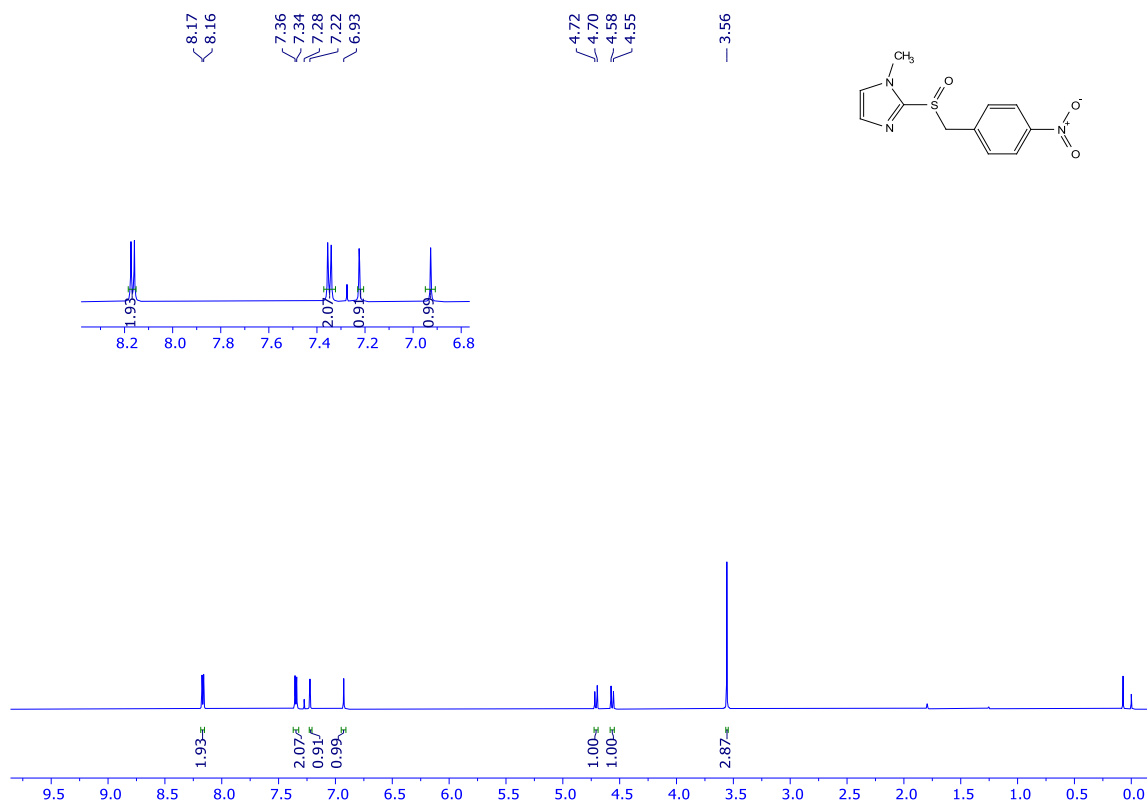

Fig. S29. <sup>1</sup>H NMR spectrum of compound **8b** (CDCl<sub>3</sub>, 600 MHz)

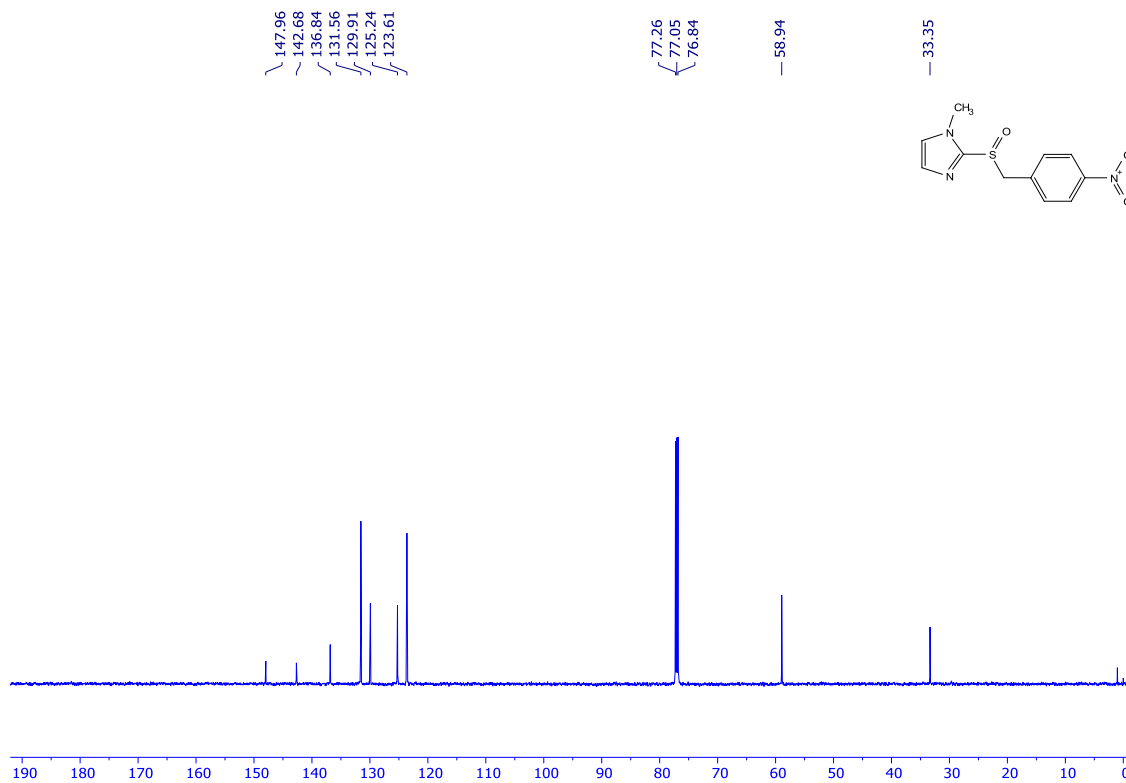

Fig. S30. <sup>13</sup>C NMR spectrum of compound **8b** (CDCl<sub>3</sub>, 600 MHz)

## 2-((2-chloro-4-fluorobenzyl)sulfonyl)-1-methyl-1H-imidazole (1c)

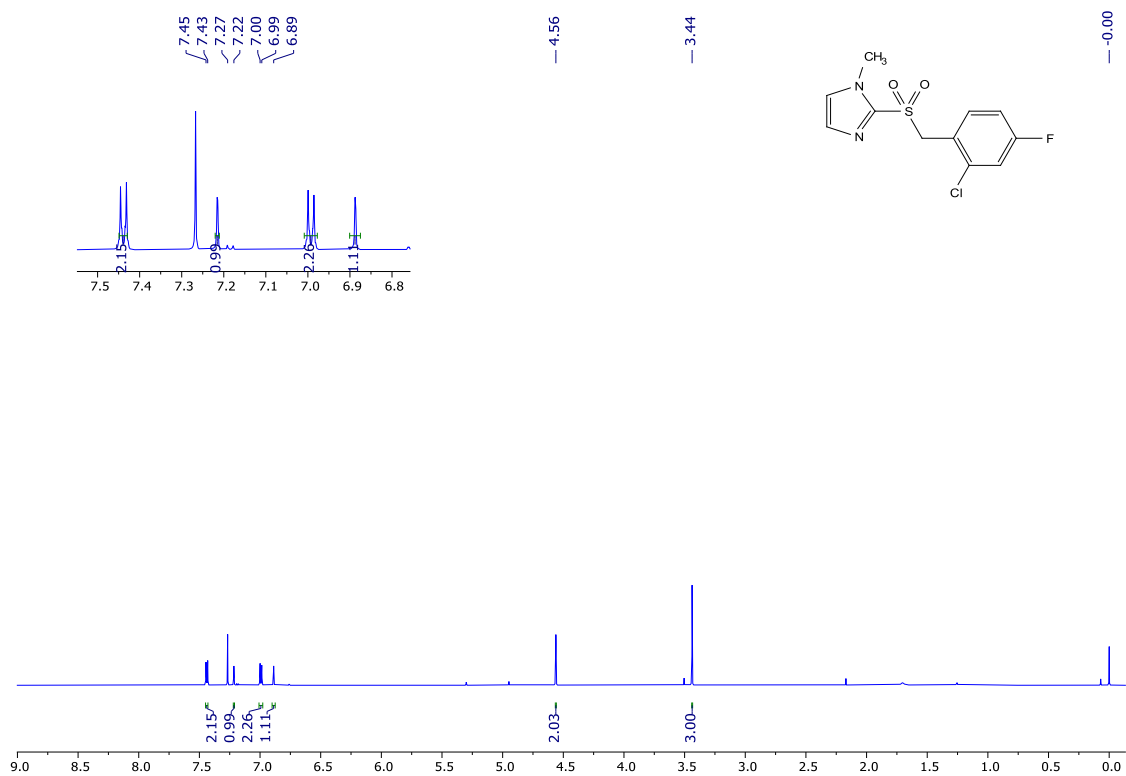

Fig. S31. <sup>1</sup>H NMR spectrum of compound **1c** (CDCl<sub>3</sub>, 600 MHz)

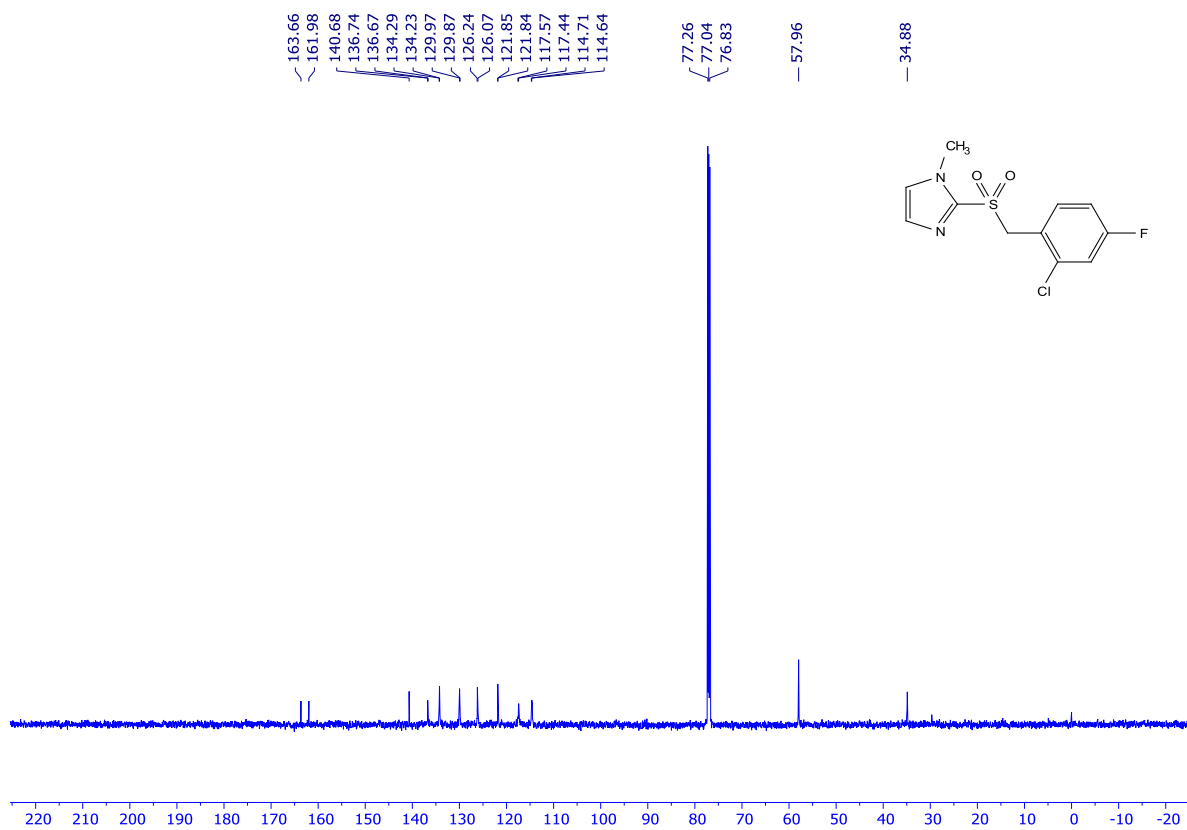

Fig. S32. <sup>13</sup>C NMR spectrum of compound **1c** (CDCl<sub>3</sub>, 600 MHz)

## 2-(benzylsulfonyl)-1-methyl-1H-imidazole (2c)

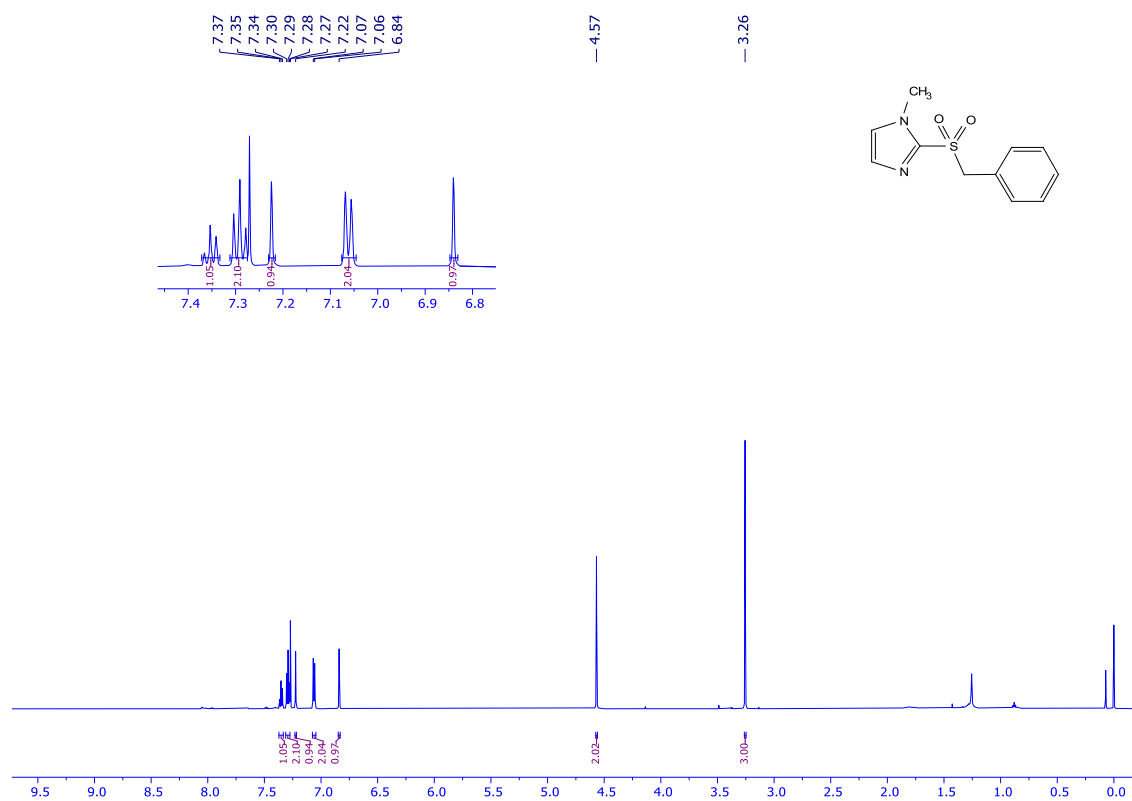

Fig. S33. <sup>1</sup>H NMR spectrum of compound 1c (CDCl<sub>3</sub>, 600 MHz)

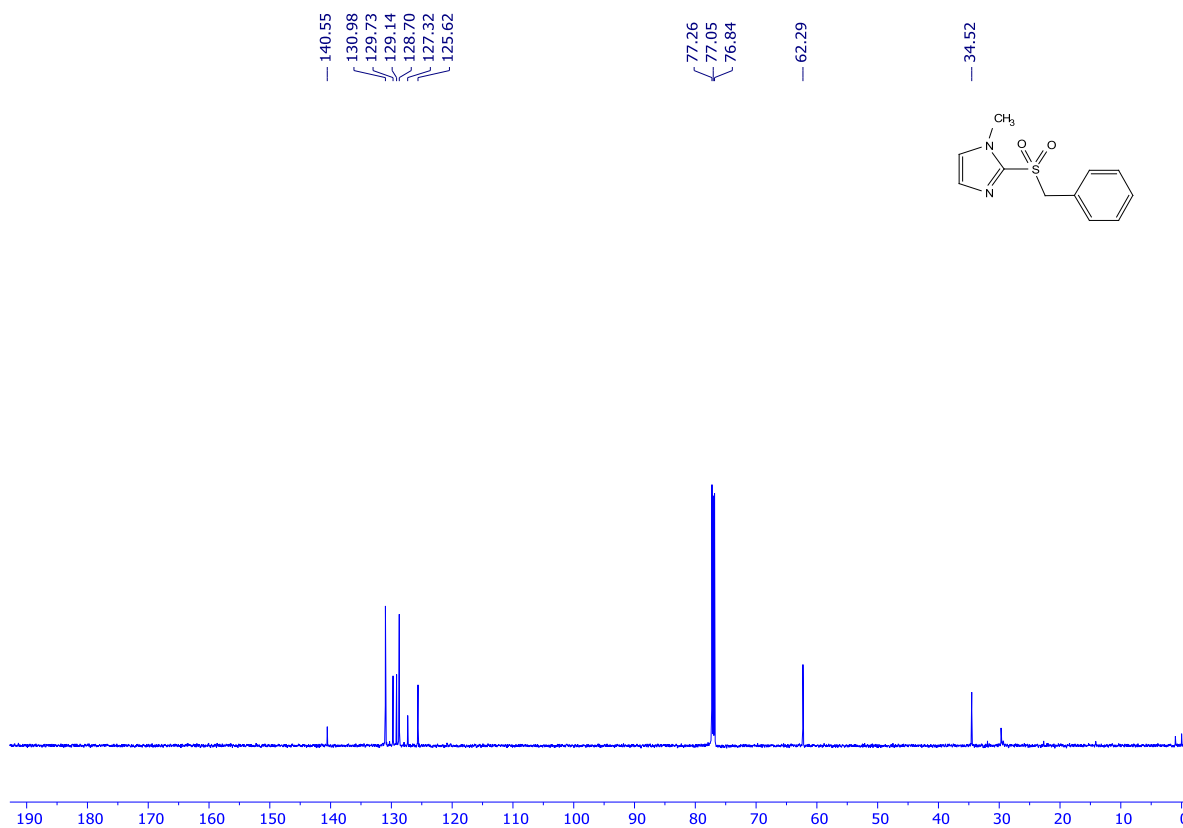

Fig. S34. <sup>13</sup>C NMR spectrum of compound 1c (CDCl<sub>3</sub>, 600 MHz)

## 2-((4-bromobenzyl)sulfonyl)-1-methyl-1H-imidazole (3c)

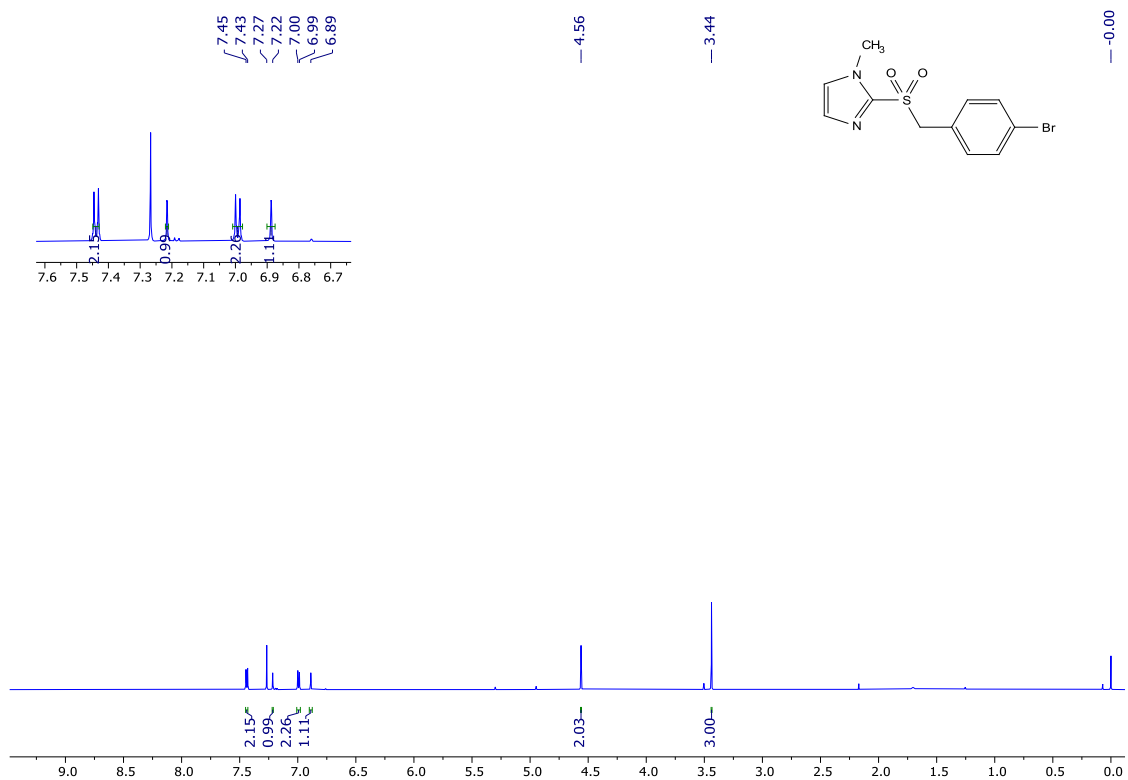

Fig. S35. <sup>1</sup>H NMR spectrum of compound **3c** (CDCl<sub>3</sub>, 600 MHz)

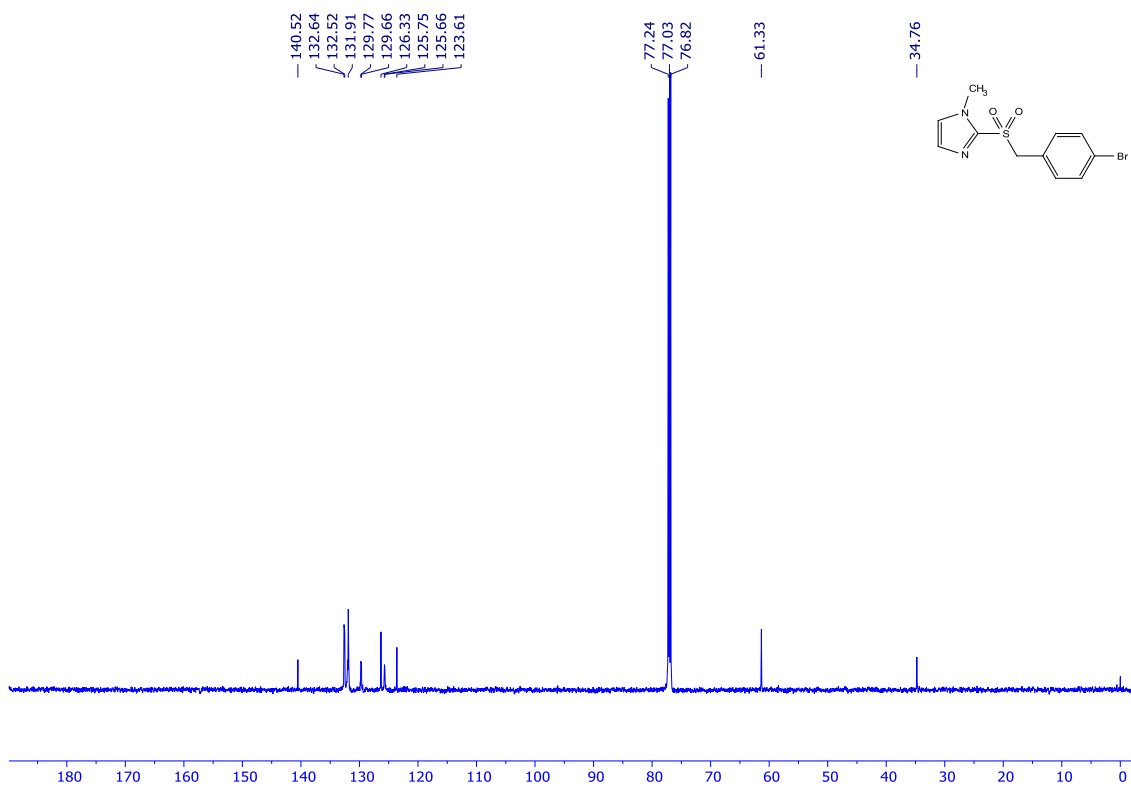

Fig. S36. <sup>13</sup>C NMR spectrum of compound **3c** (CDCl<sub>3</sub>, 600 MHz)



## 2-((4-bromo-2-fluorobenzyl)sulfonyl)-1-methyl-1H-imidazole (4c)

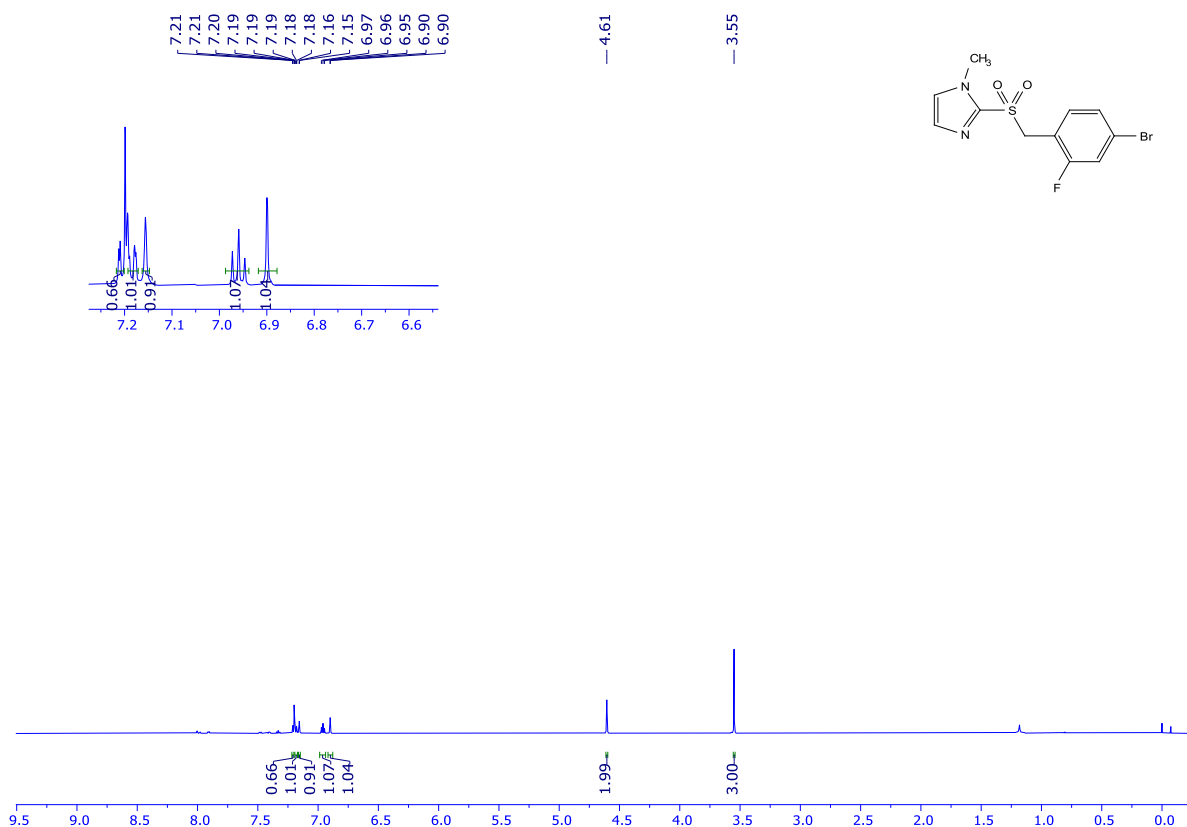

Fig. S37.  $^1\text{H}$  NMR spectrum of compound **4c** ( $\text{CDCl}_3$ , 600 MHz)

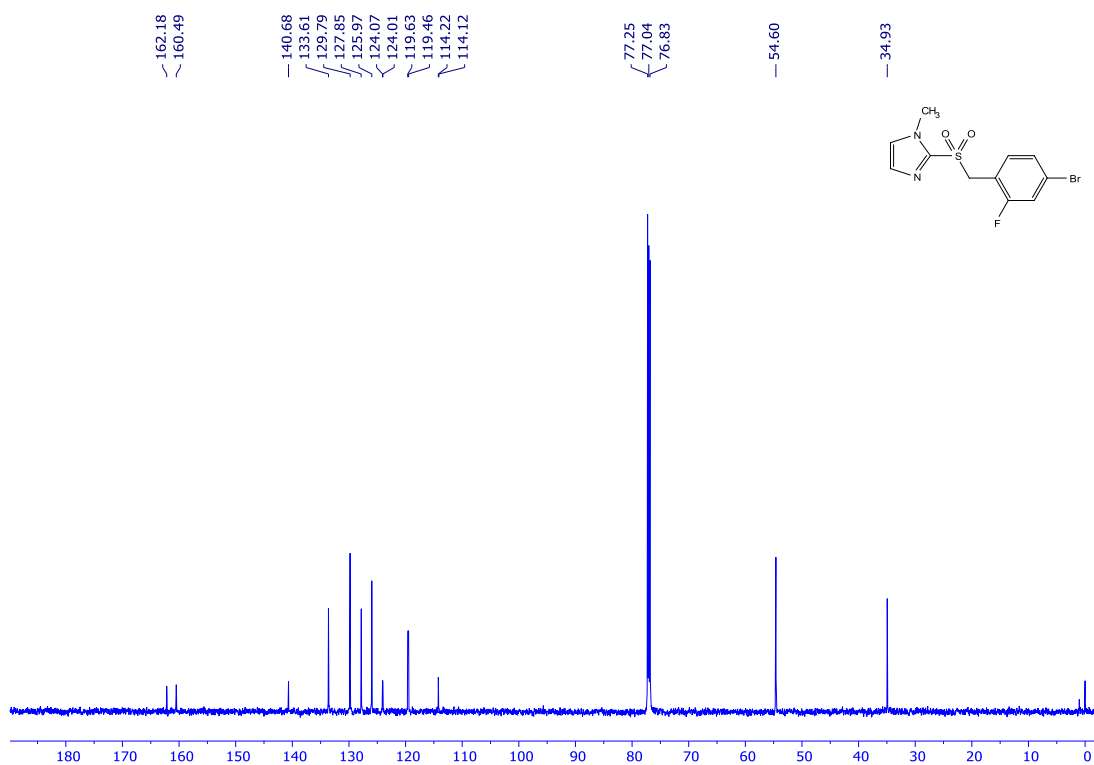

Fig. S38.  $^{13}\text{C}$  NMR spectrum of compound **4c** ( $\text{CDCl}_3$ , 600 MHz)

### 1-methyl-2-((4-(trifluoromethoxy)benzyl)sulfonyl)-1H-imidazole (5c)

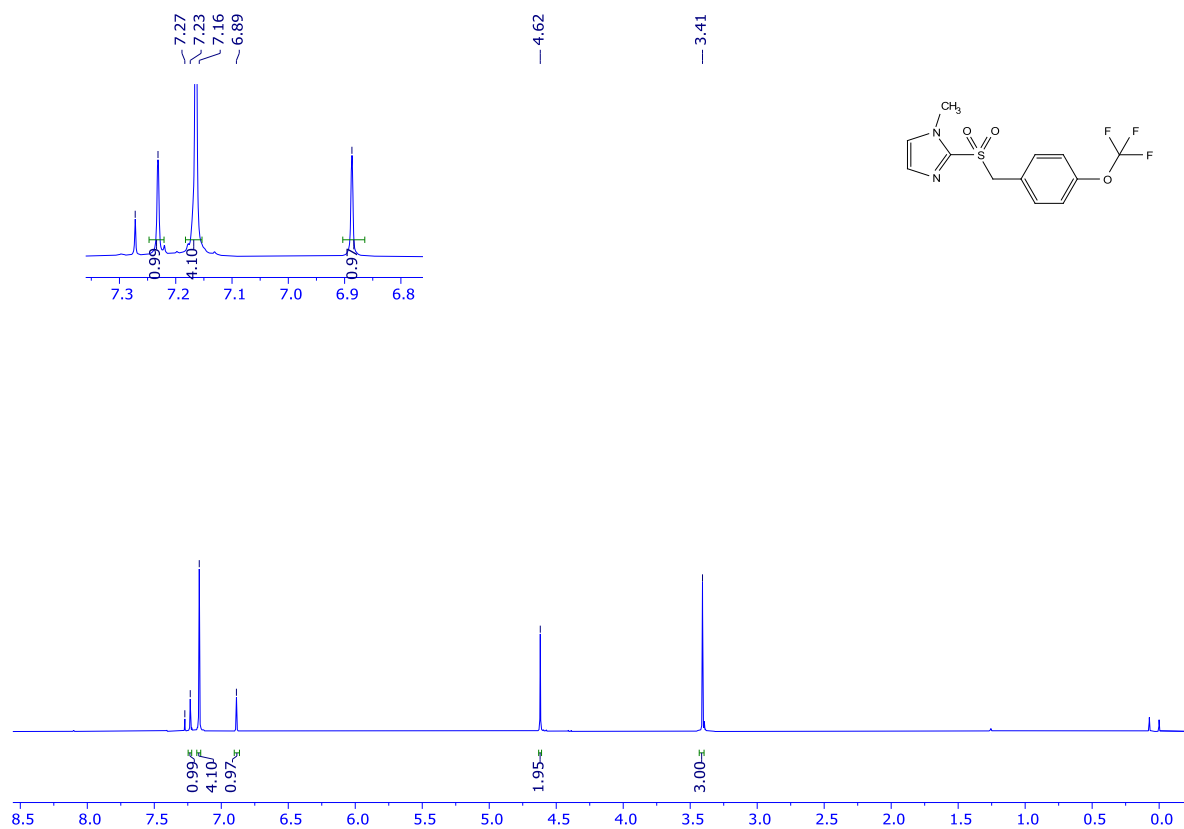

Fig. S39.  $^1\text{H}$  NMR spectrum of compound **5c** ( $\text{CDCl}_3$ , 600 MHz)

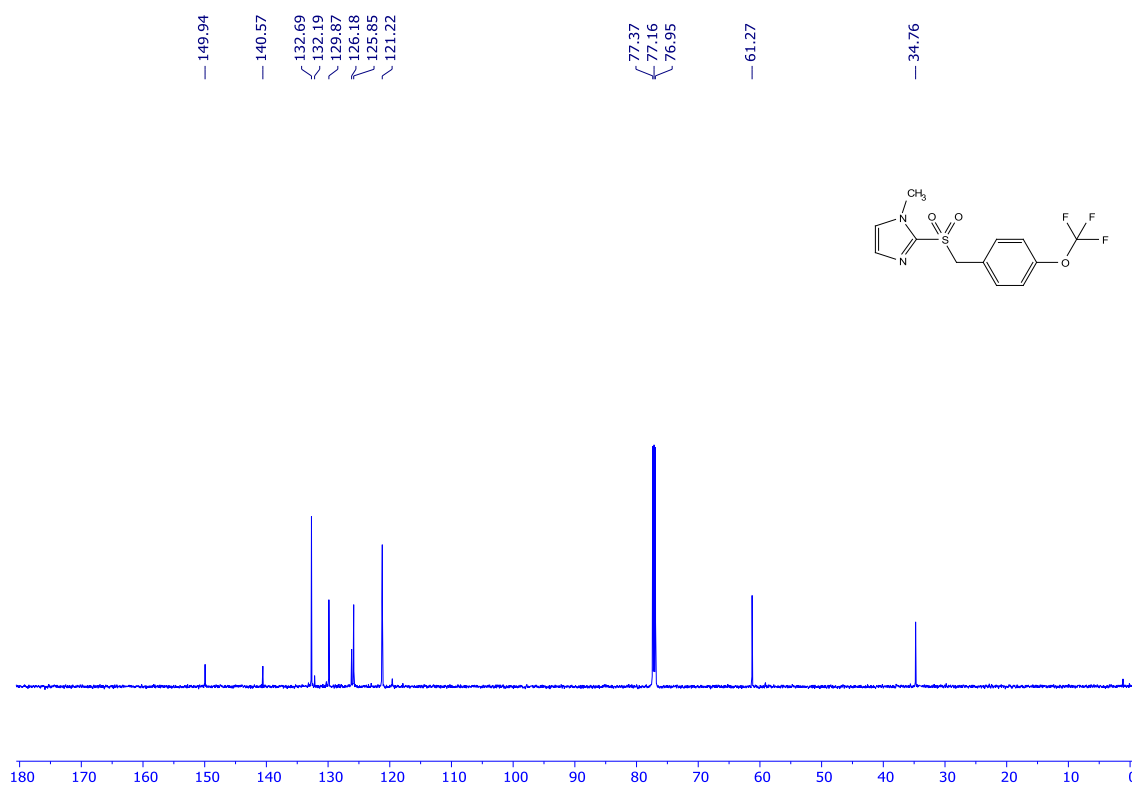

Fig. S40.  $^{13}\text{C}$  NMR spectrum of compound **5c** ( $\text{CDCl}_3$ , 600 MHz)

## 2-((4-(tert-butyl)benzyl)sulfinyl)-1-methyl-1H-imidazole (6c)

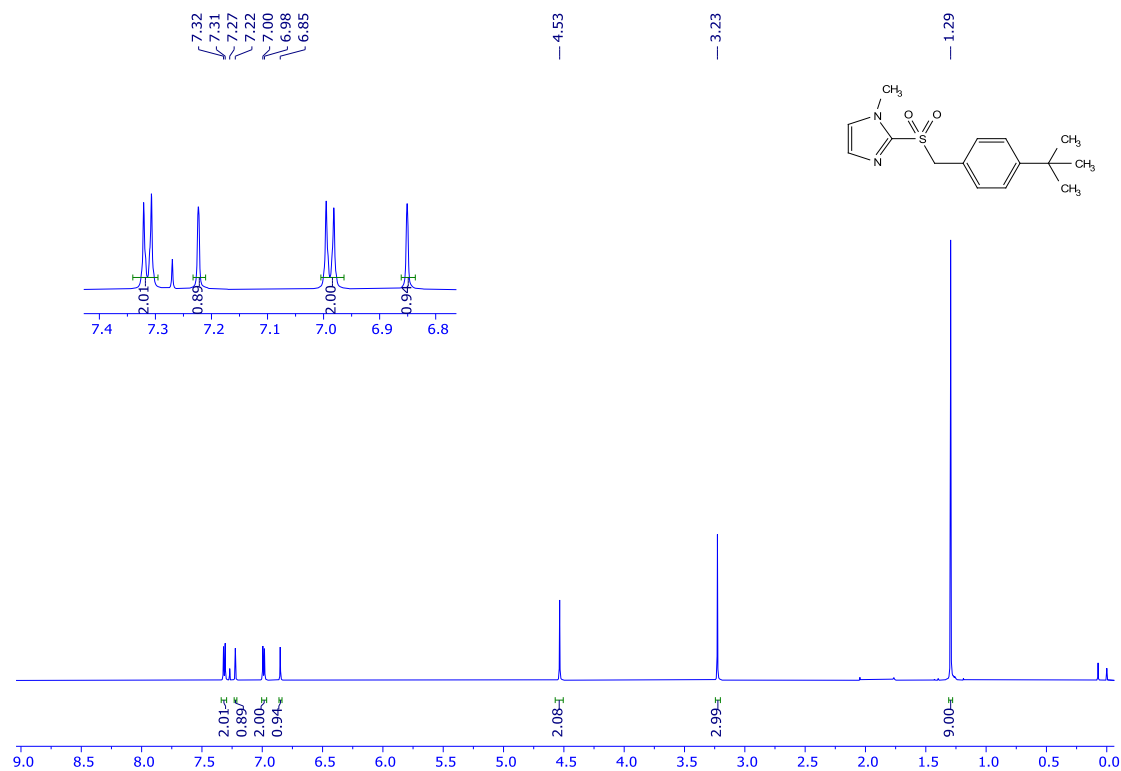

Fig. S41. <sup>1</sup>H NMR spectrum of compound **6c** (CDCl<sub>3</sub>, 600 MHz)

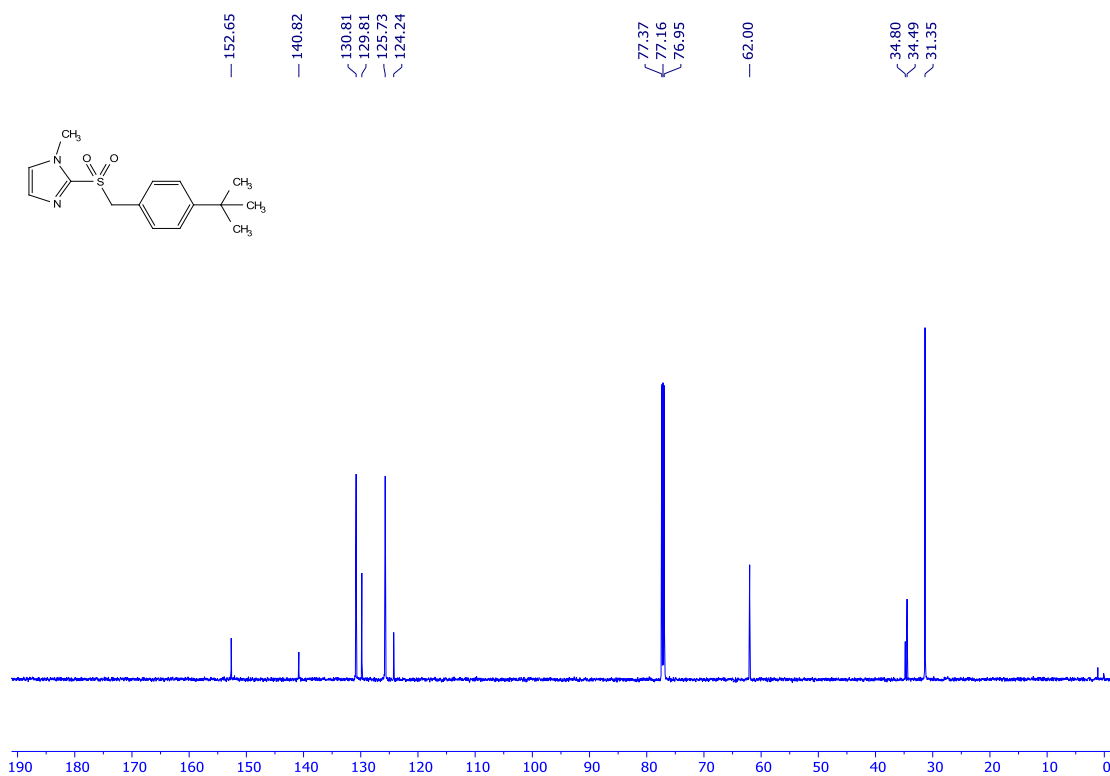

Fig. S42. <sup>13</sup>C NMR spectrum of compound **6c** (CDCl<sub>3</sub>, 600 MHz)

# 1-methyl-2-((3-(trifluoromethyl)benzyl)sulfonyl)-1H-imidazole (7c)

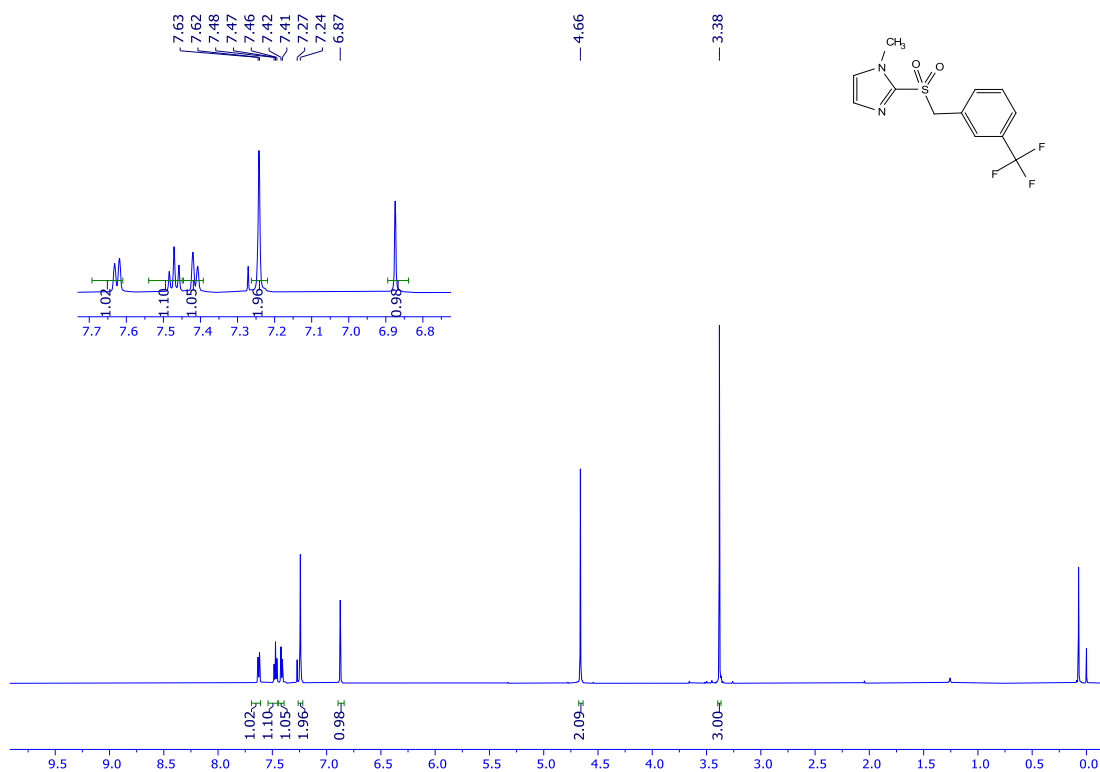

Fig. S43. <sup>1</sup>H NMR spectrum of compound **7c** (CDCl<sub>3</sub>, 600 MHz)

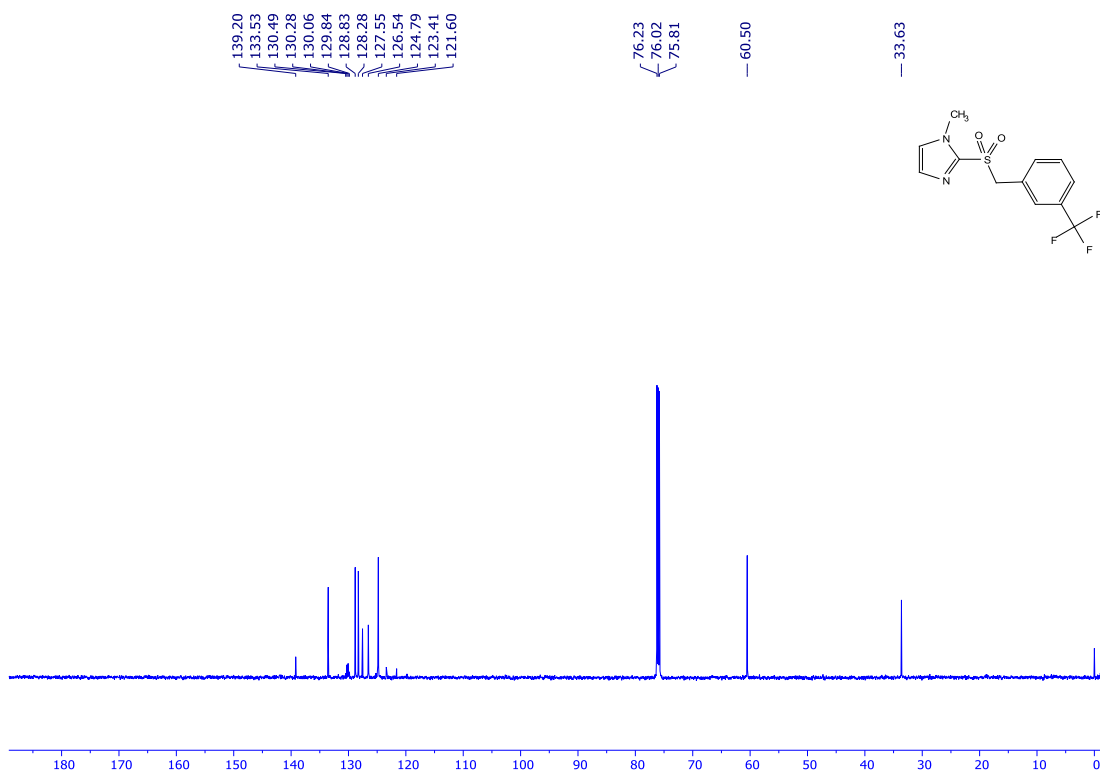

Fig. S44. <sup>13</sup>C NMR spectrum of compound **7c** (CDCl<sub>3</sub>, 600 MHz)

# 1-methyl-2-((4-nitrobenzyl)sulfonyl)-1H-imidazole (8c)

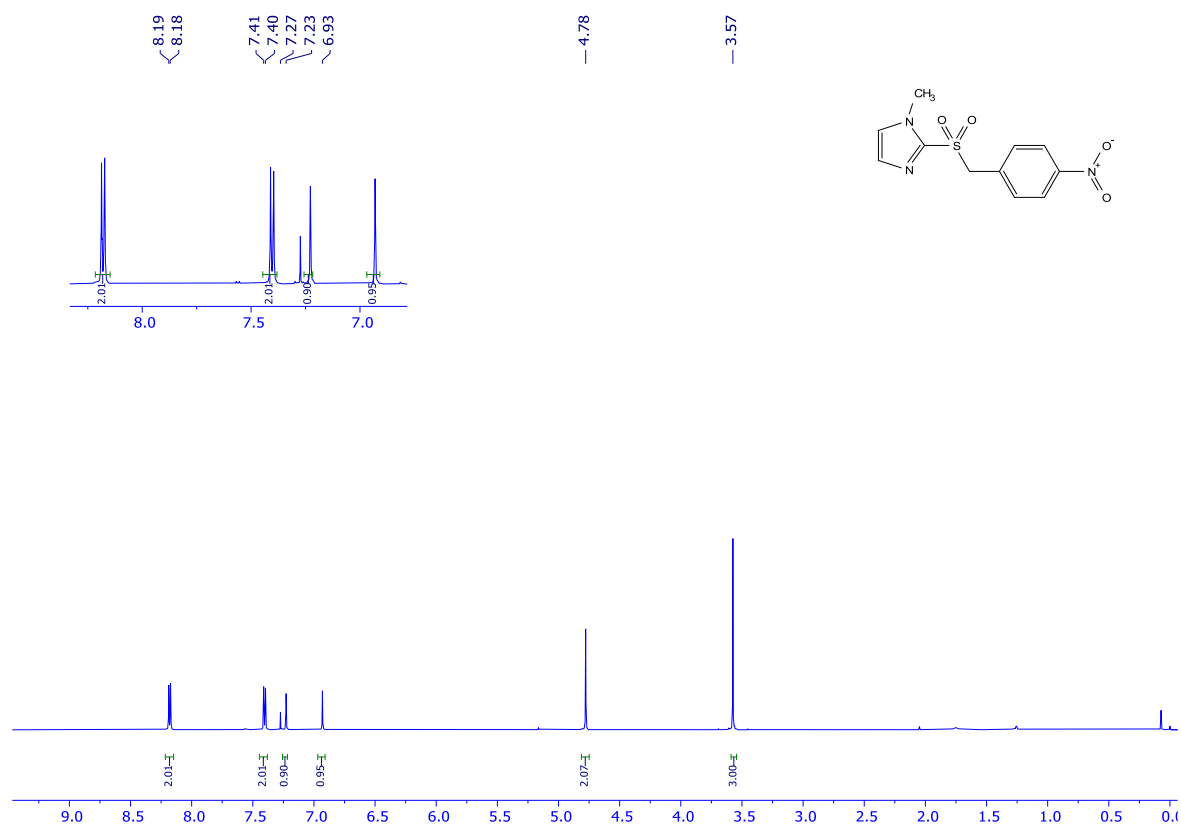

Fig. S45.  $^1\text{H}$  NMR spectrum of compound **8c** ( $\text{CDCl}_3$ , 600 MHz)

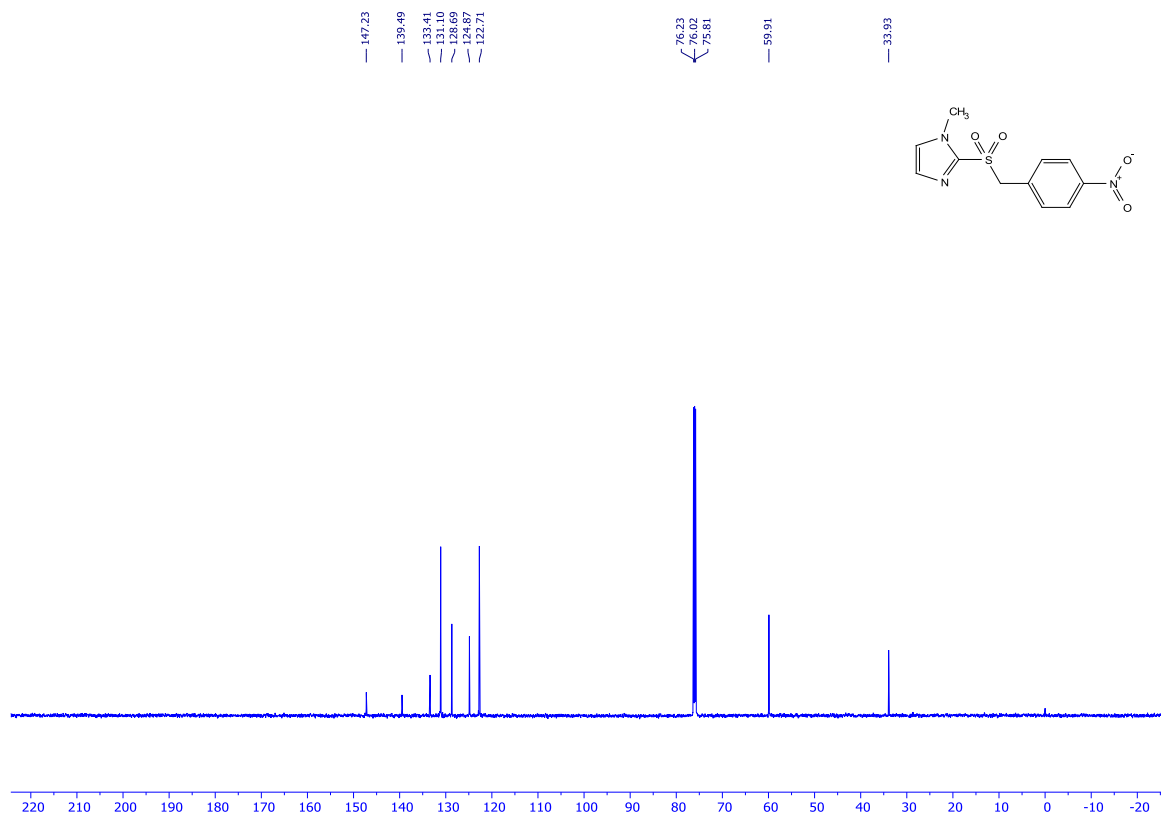

Fig. S46.  $^{13}\text{C}$  NMR spectrum of compound **8c** ( $\text{CDCl}_3$ , 600 MHz)

**1,3-dimethyl-2-((2-chloro-4-fluorobenzyl)thio)-1H-imidazol-3-ium Triflate (1d)**

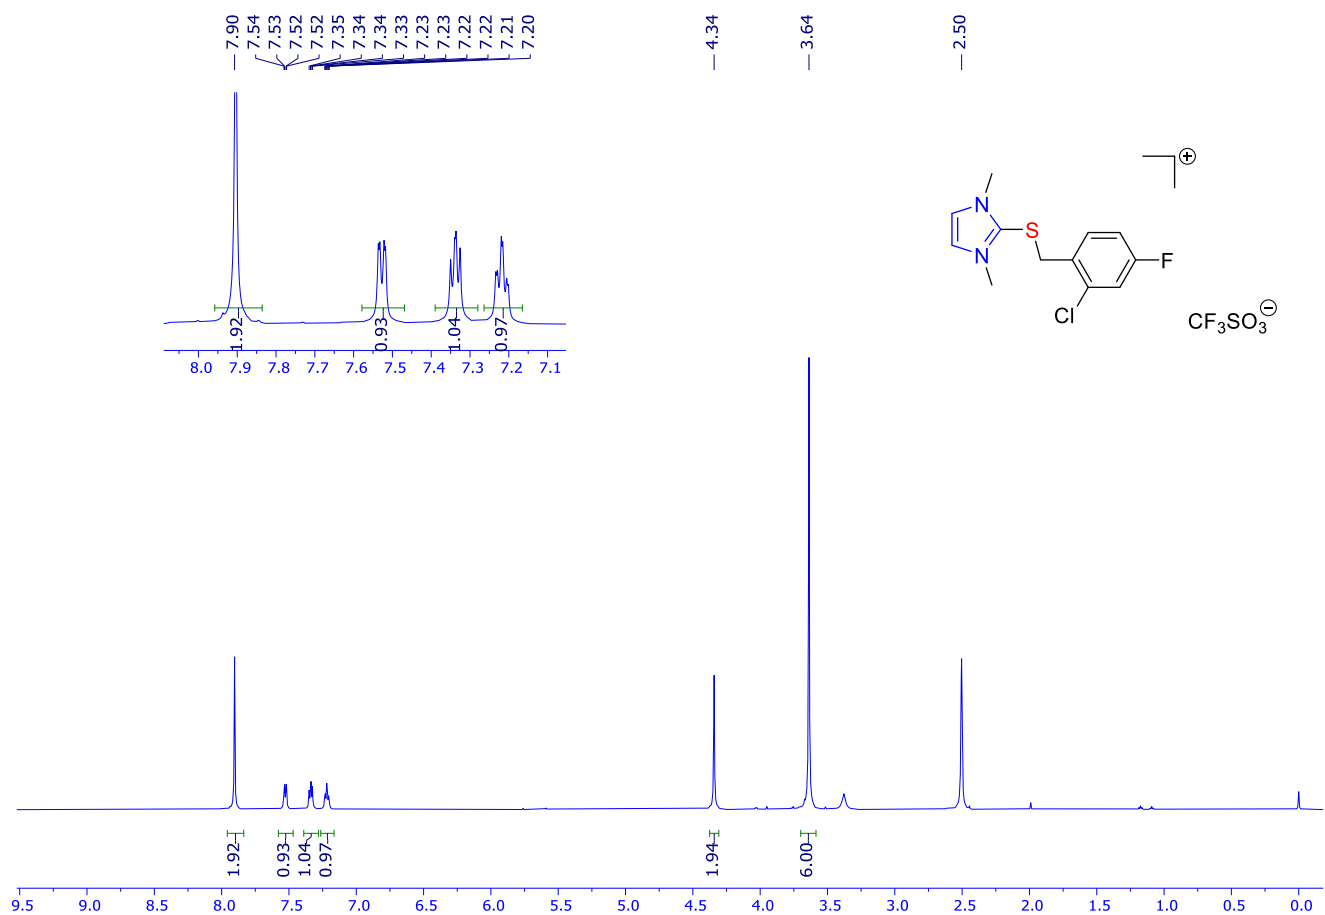

Fig. S47. <sup>1</sup>H NMR spectrum of compound **1d** (DMSO-*d*<sub>6</sub>, 600 MHz)

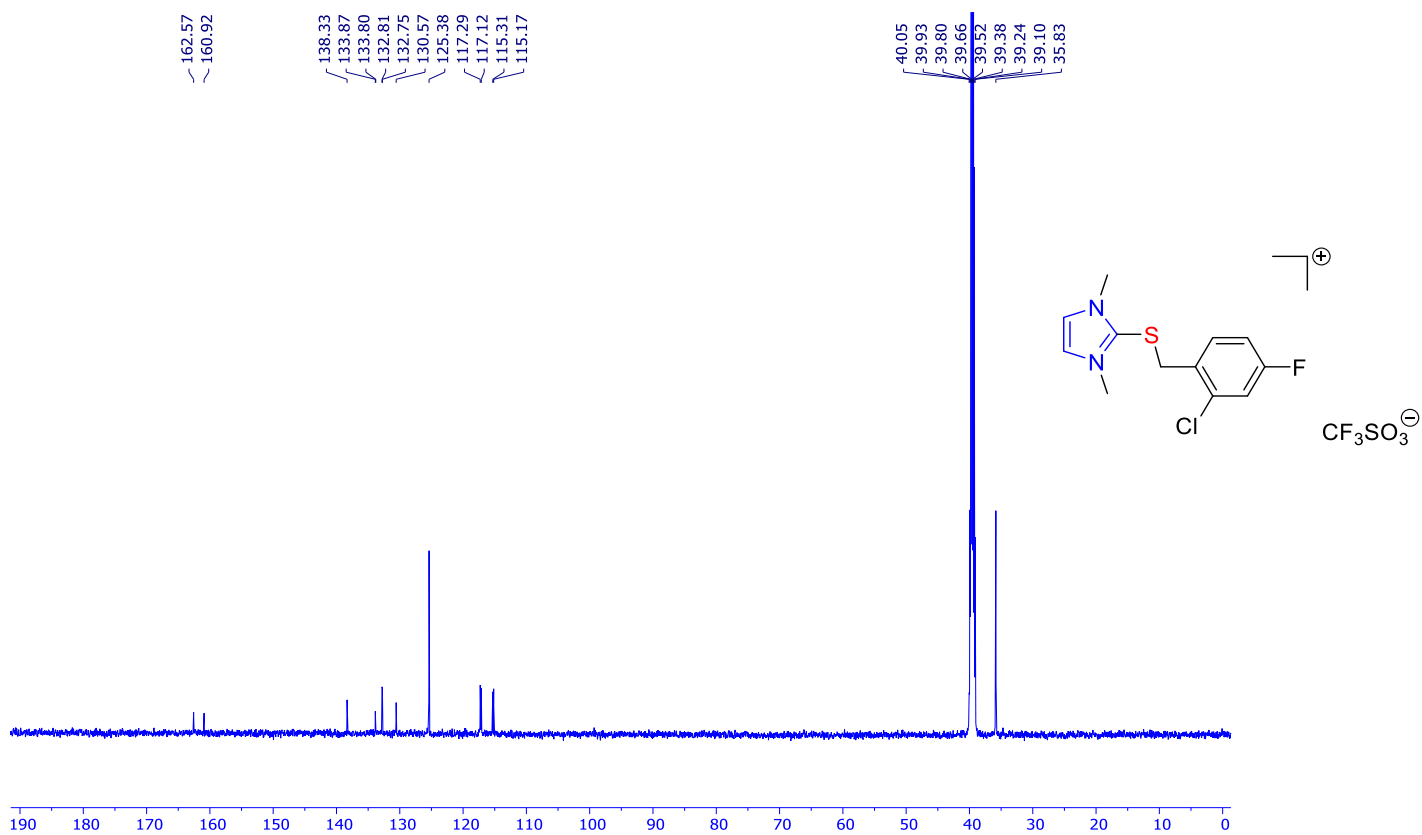

Fig. S48.  $^{13}\text{C}$  NMR spectrum of compound **1d** (DMSO- $d_6$ , 600 MHz)

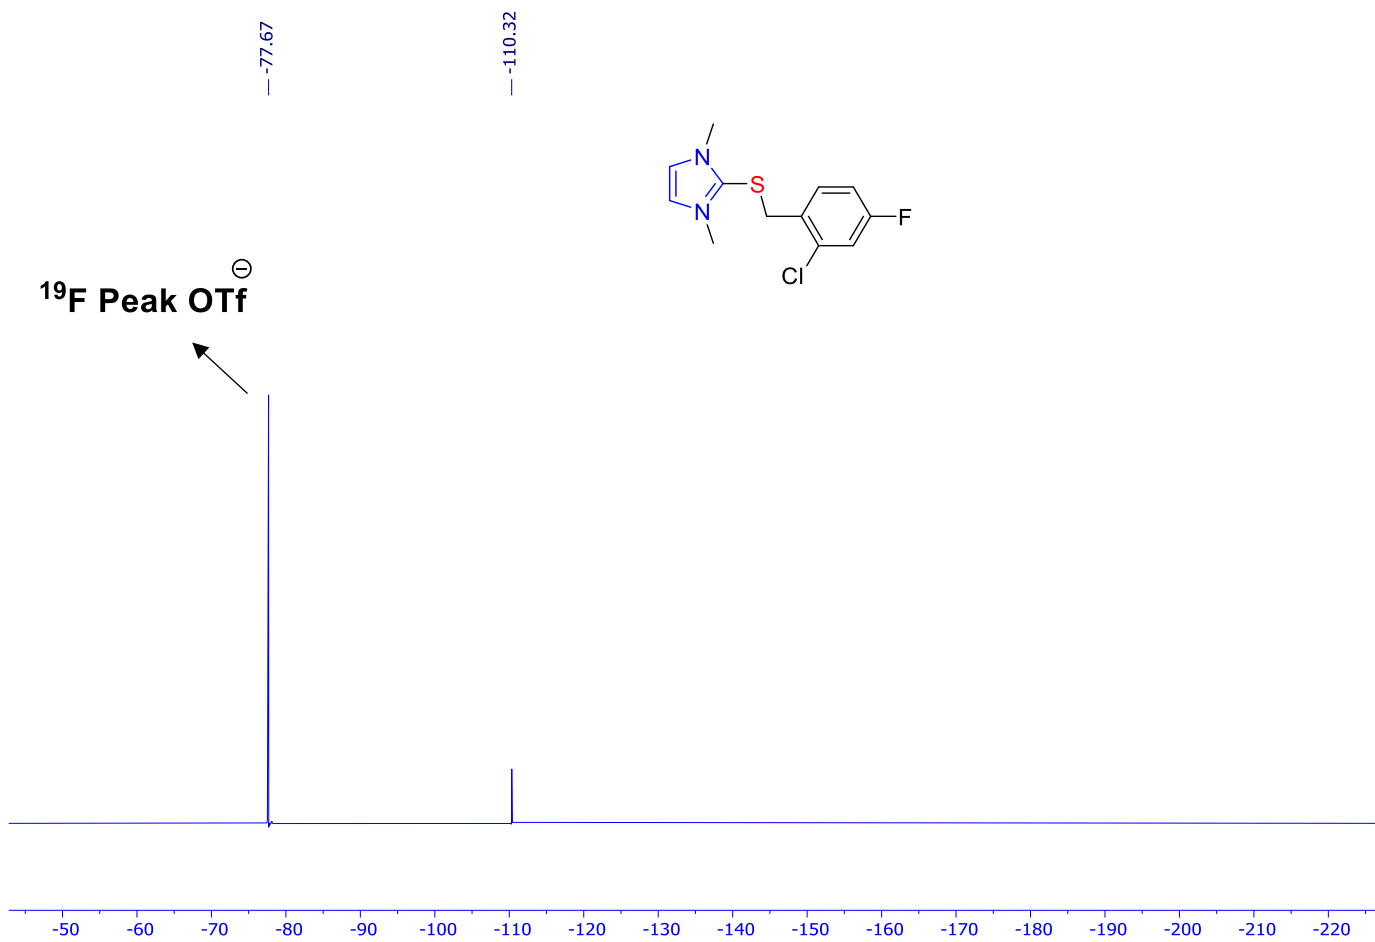

Fig. S49.  $^{19}\text{F}$  NMR spectrum of compound **1d** ( $\text{DMSO}-d_6$ , 600 MHz)



1,3-dimethyl-2-(benzylthio)-1H-imidazol-3-ium Triflate (2d)

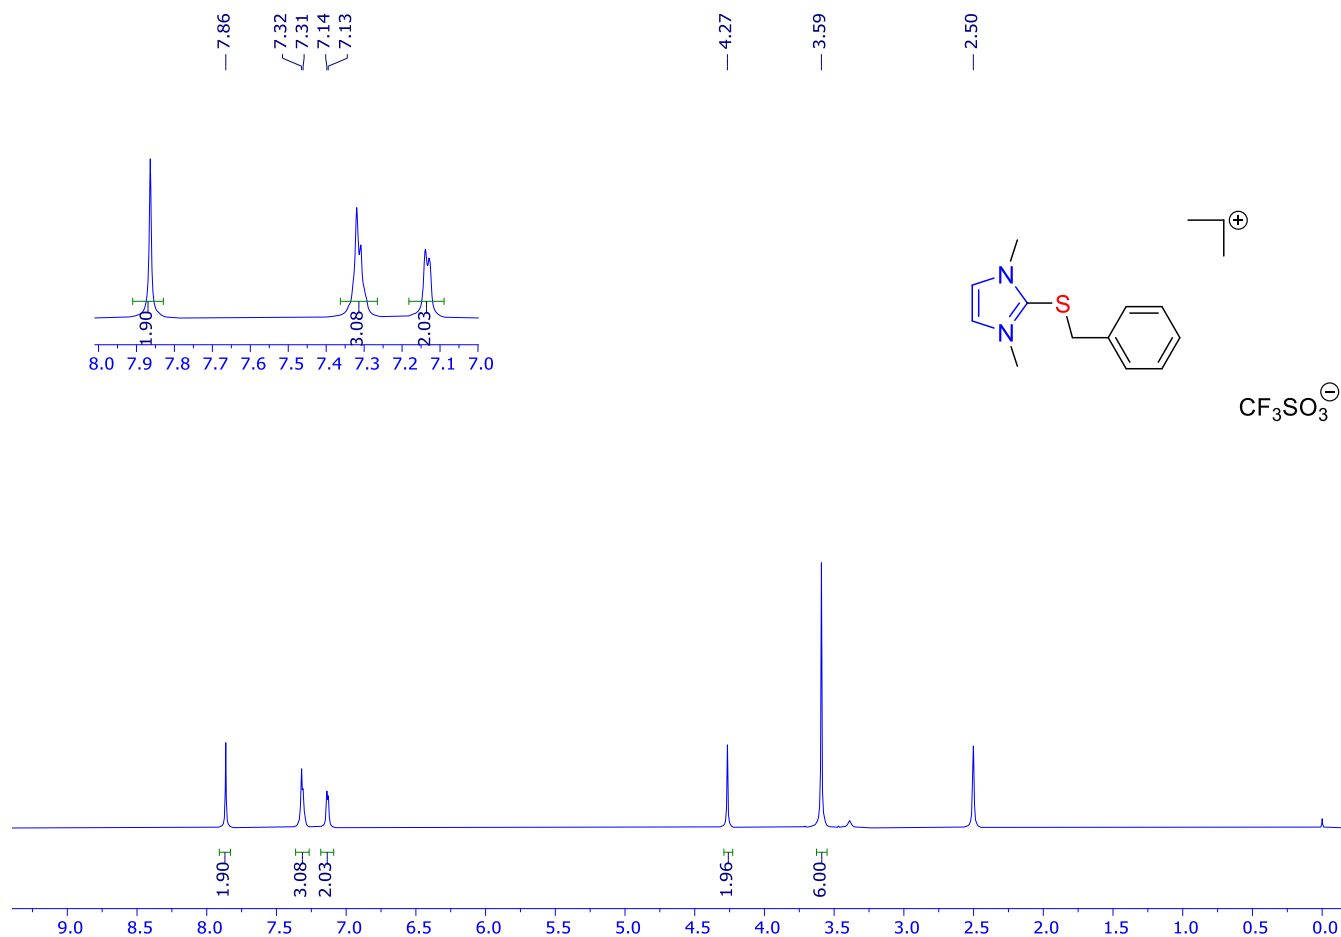

Fig. S50. <sup>1</sup>H NMR spectrum of compound 2d (DMSO-*d*<sub>6</sub>, 600 MHz)

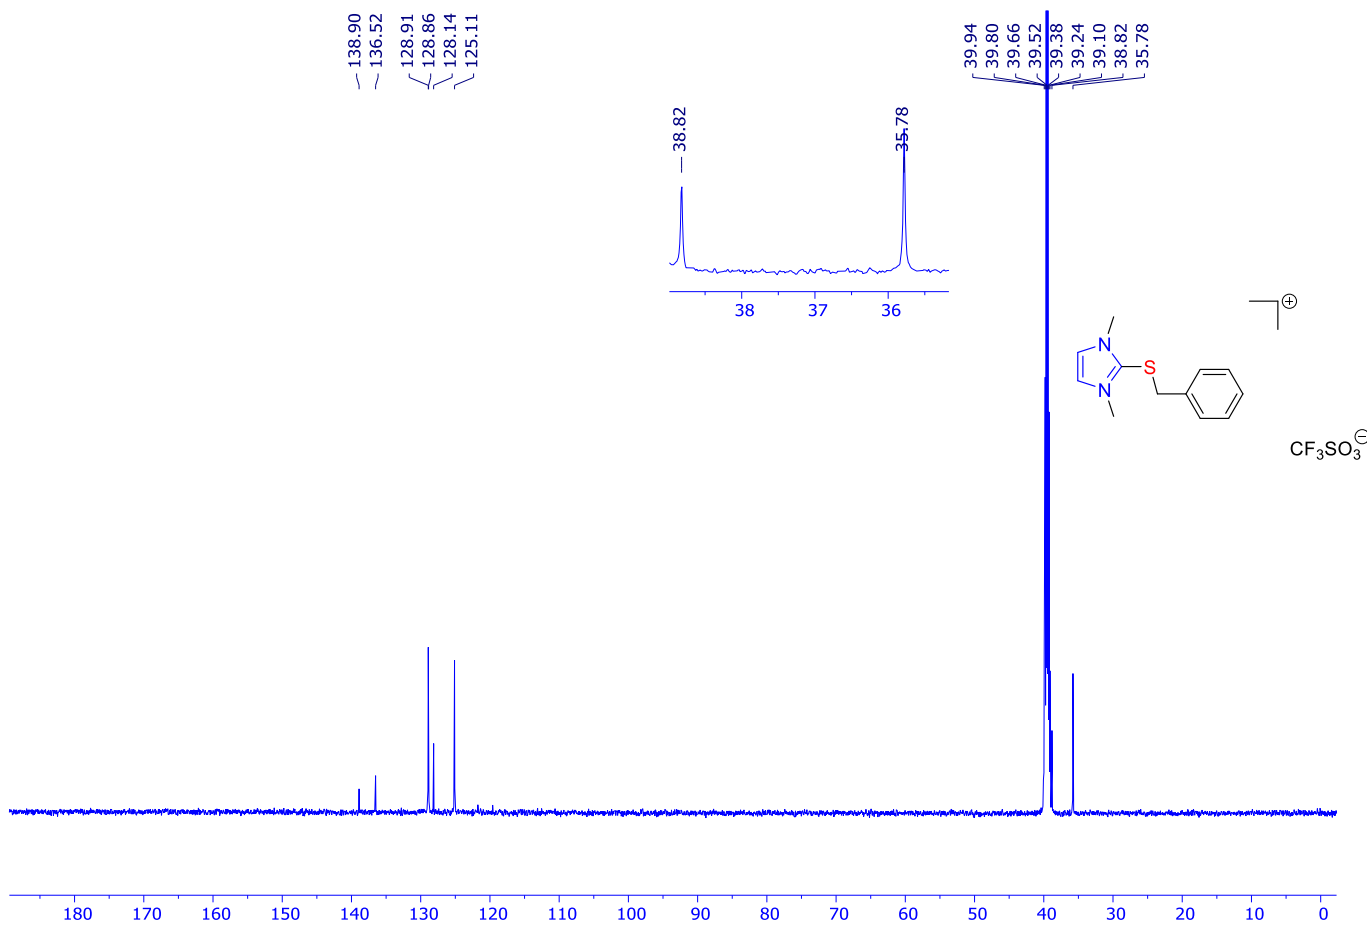

Fig. S51.  $^{13}\text{C}$  NMR spectrum of compound **2d** ( $\text{DMSO}-d_6$ , 600 MHz)

### 1,3-dimethyl-2-((4-bromobenzyl)thio)-1H-imidazol-3-ium Triflate (3d)

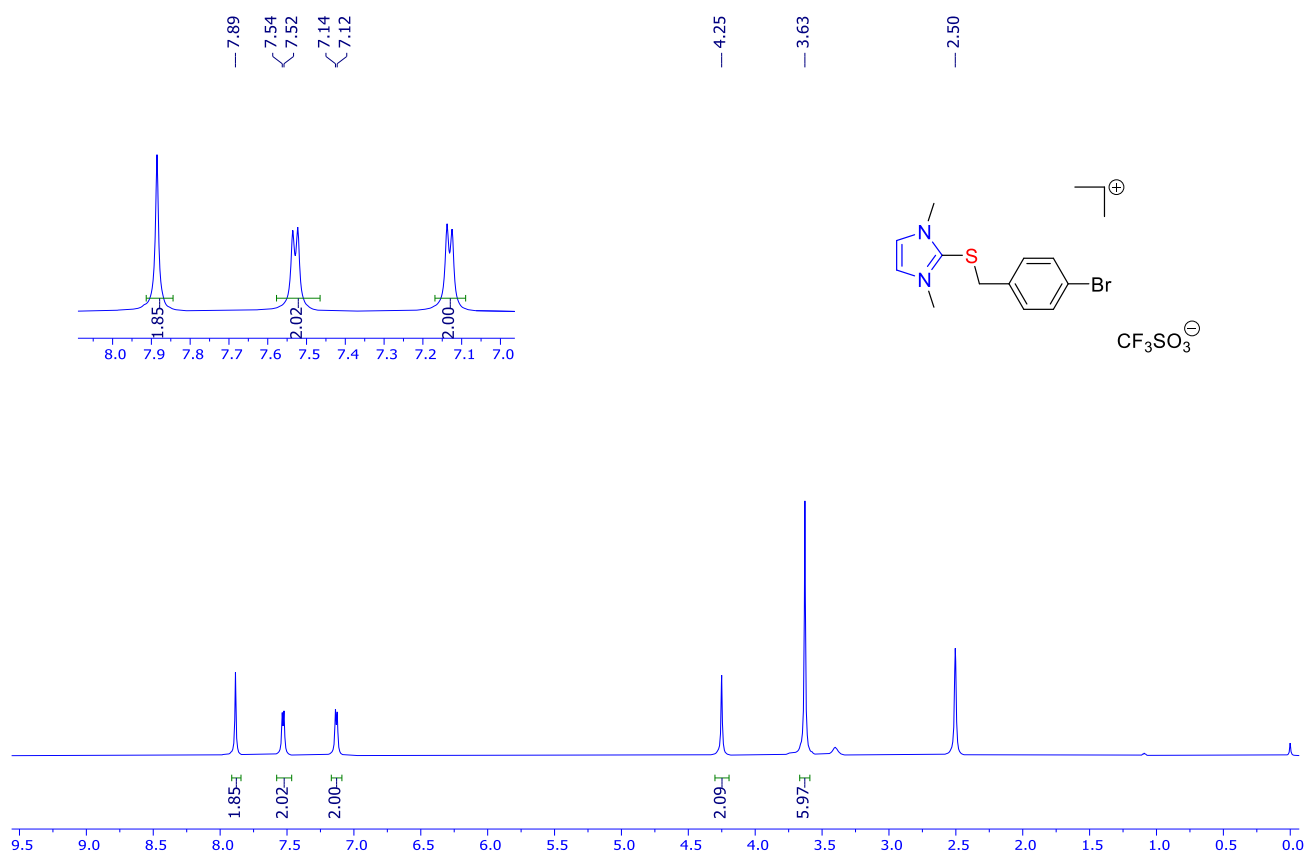

Fig. S52.  $^1\text{H}$  NMR spectrum of compound **3d** ( $\text{DMSO-}d_6$ , 600 MHz)

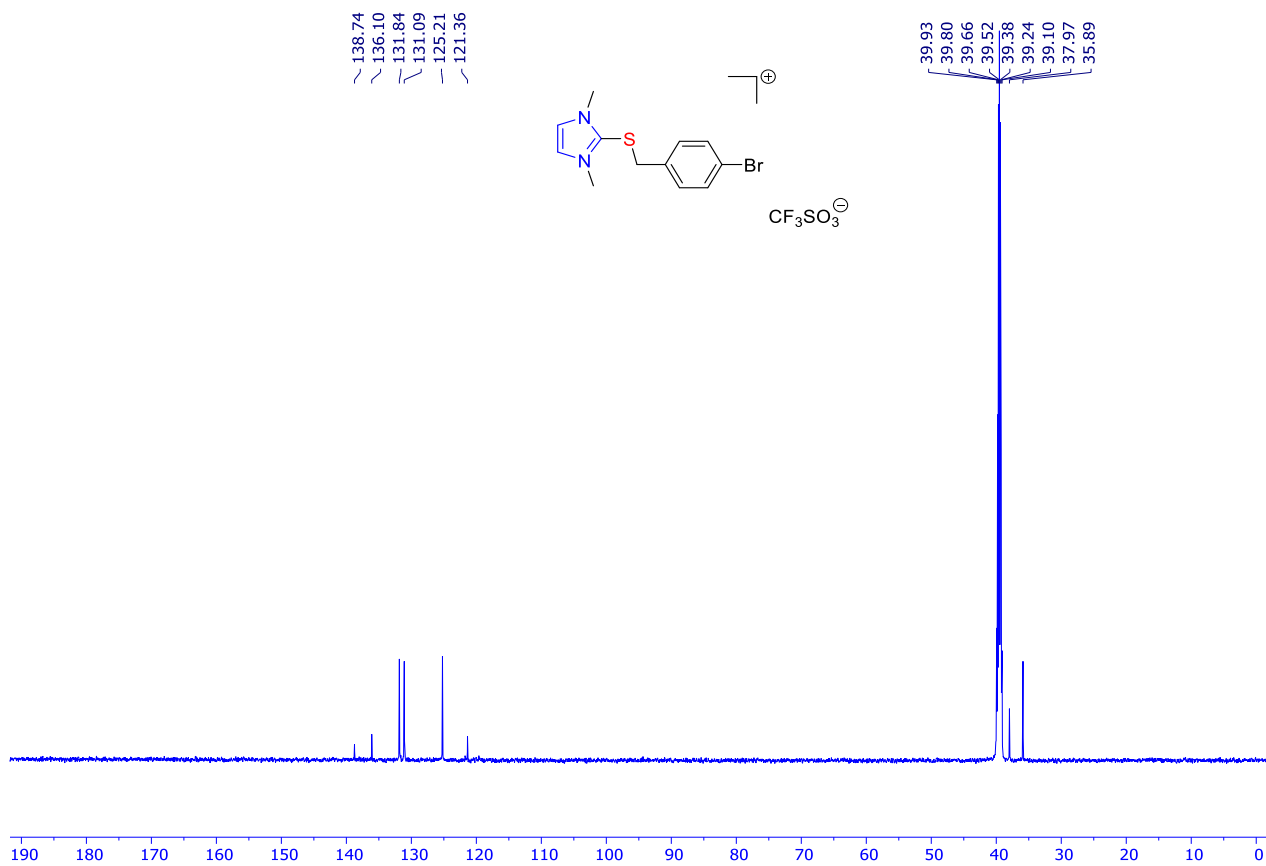

Fig. S53.  $^{13}\text{C}$  NMR spectrum of compound **3d** (DMSO- $d_6$ , 600 MHz)

# 1,3-dimethyl-2-((2-fluoro-4-bromobenzyl)thio)-1H-imidazol-3-ium Triflate (4d)

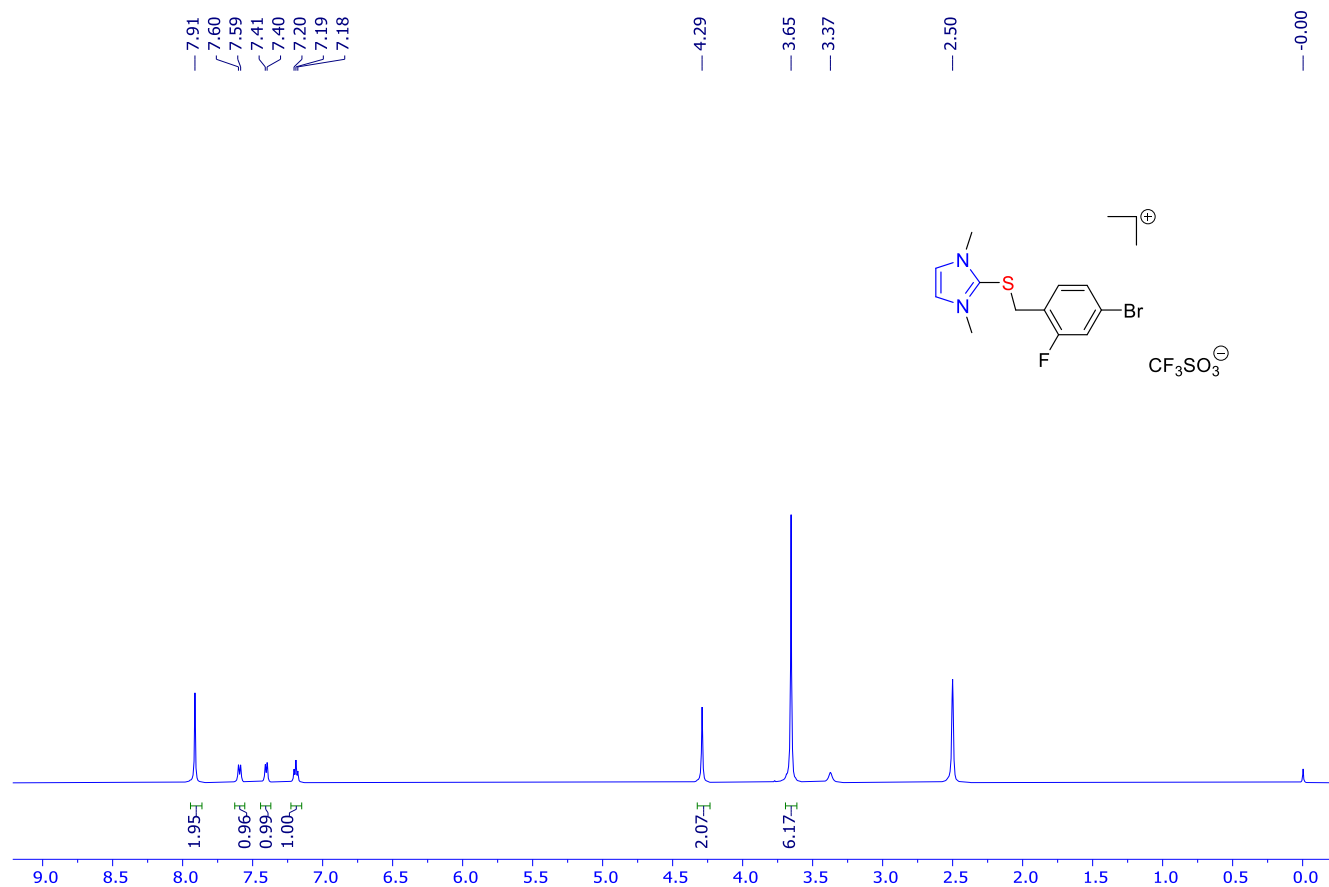

Fig. S54. <sup>1</sup>H NMR spectrum of compound **4d** (DMSO-*d*<sub>6</sub>, 600 MHz)

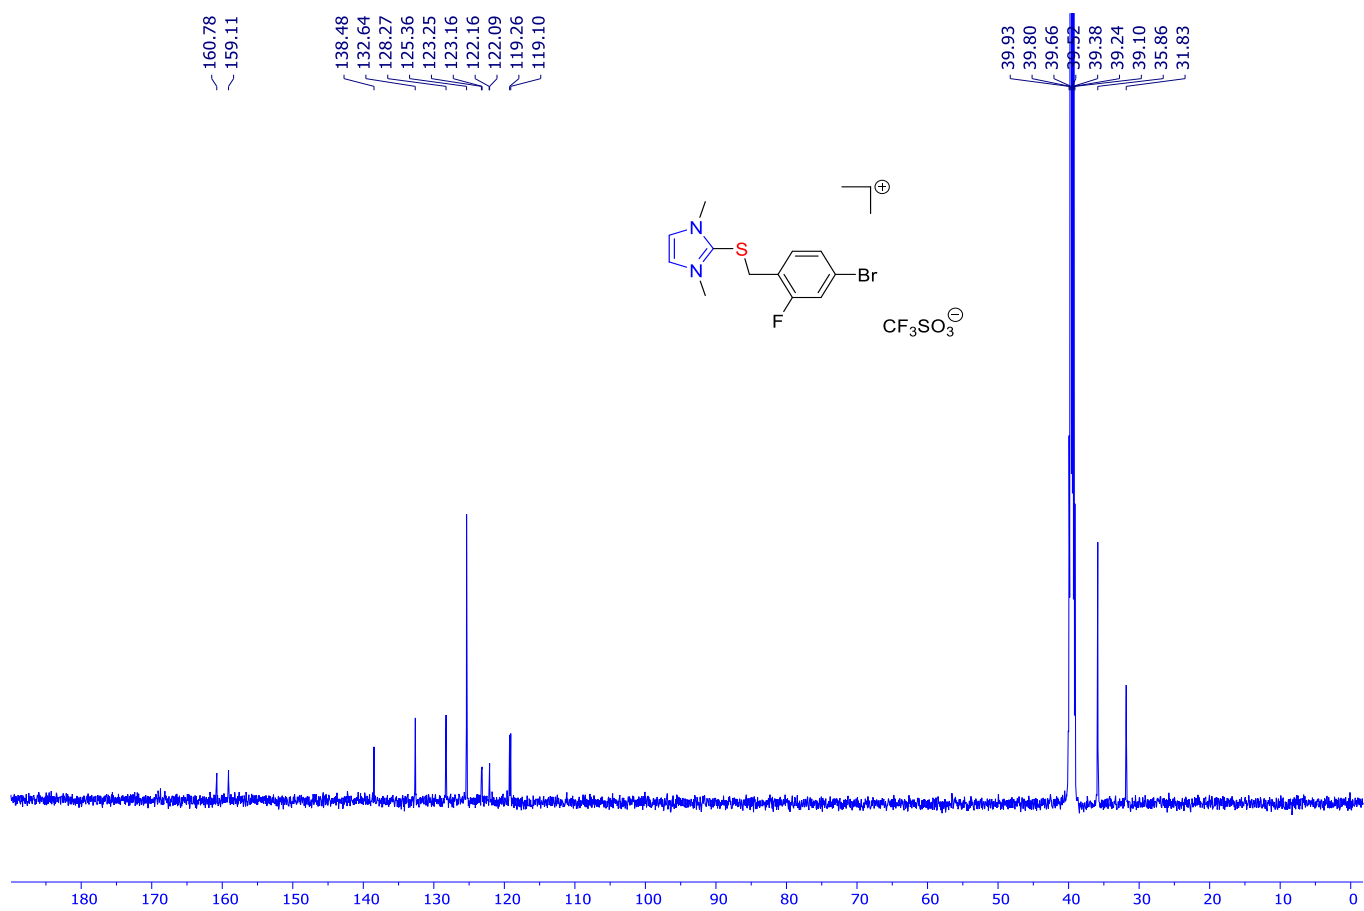

Fig. S55.  $^{13}\text{C}$  NMR spectrum of compound **4d** (DMSO- $d_6$ , 600 MHz)

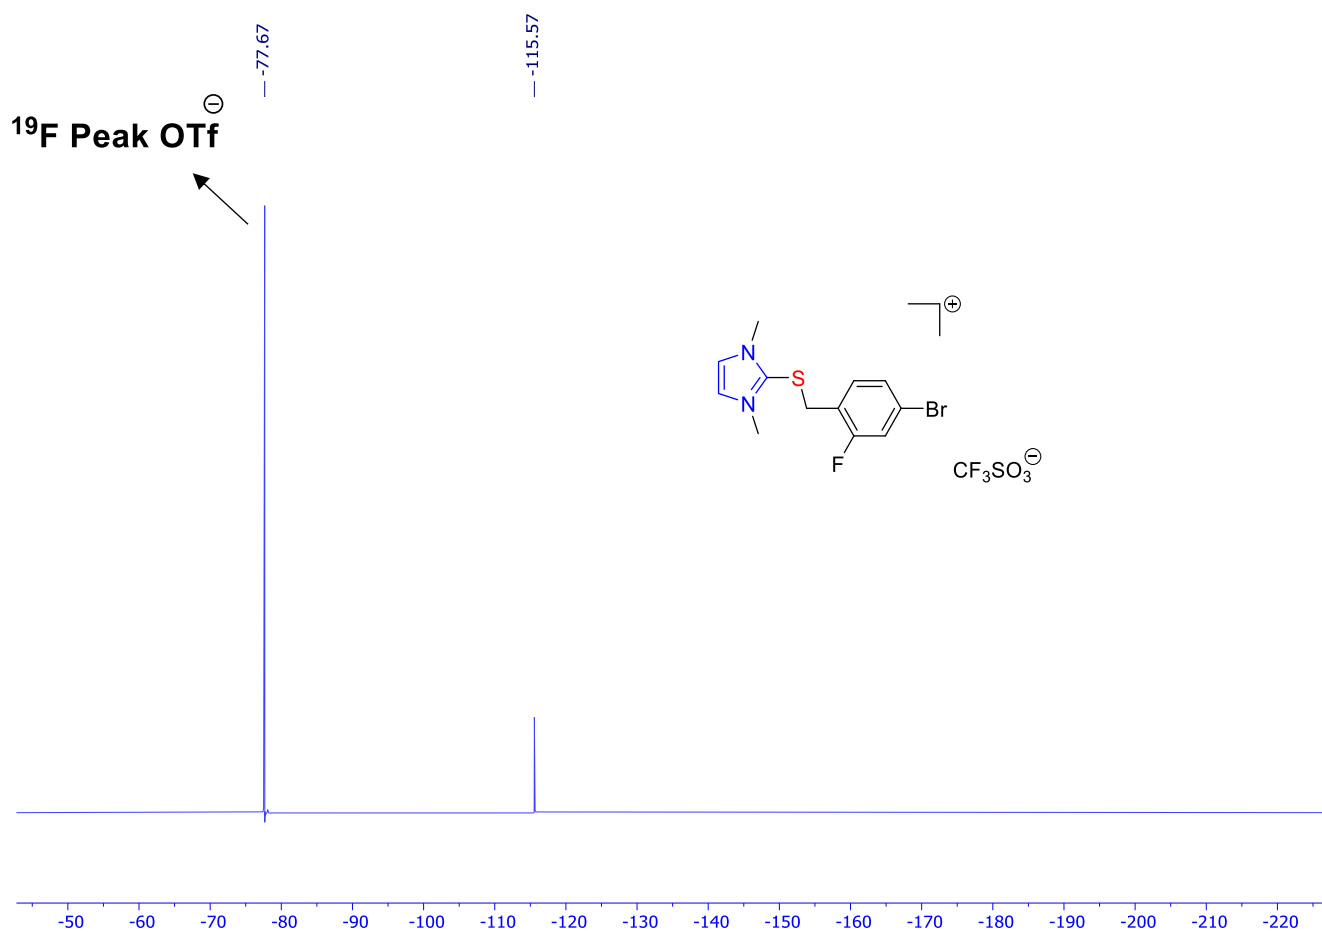

Fig. S56.  $^{19}\text{F}$  NMR spectrum of compound **4d** (DMSO- $d_6$ , 600 MHz)

**1,3-dimethyl-2-((4-(trifluoromethoxy)benzyl)thio)-1H-imidazol-3-iumTriflate (5d)**

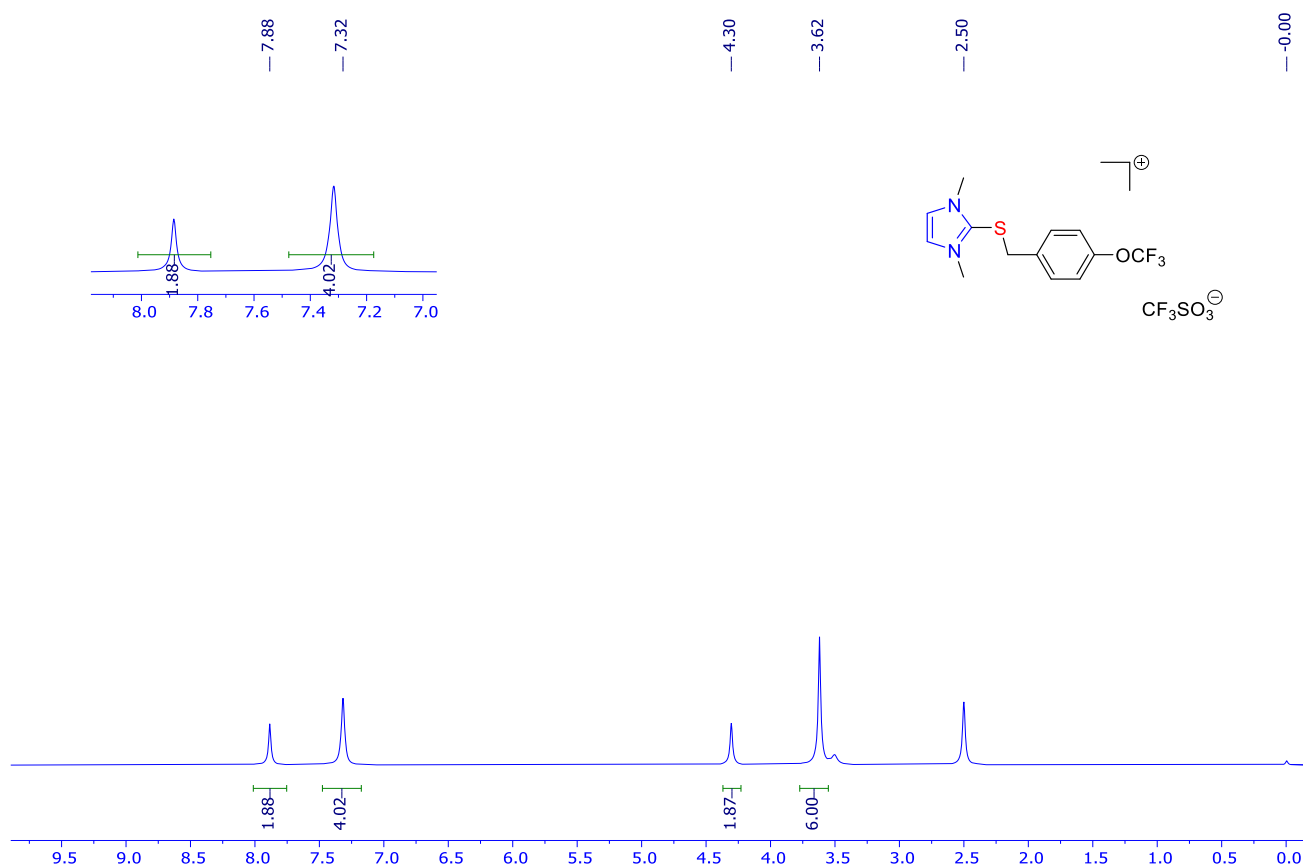

Fig. S57. <sup>1</sup>H NMR spectrum of compound **5d** (DMSO-*d*<sub>6</sub>, 600 MHz)



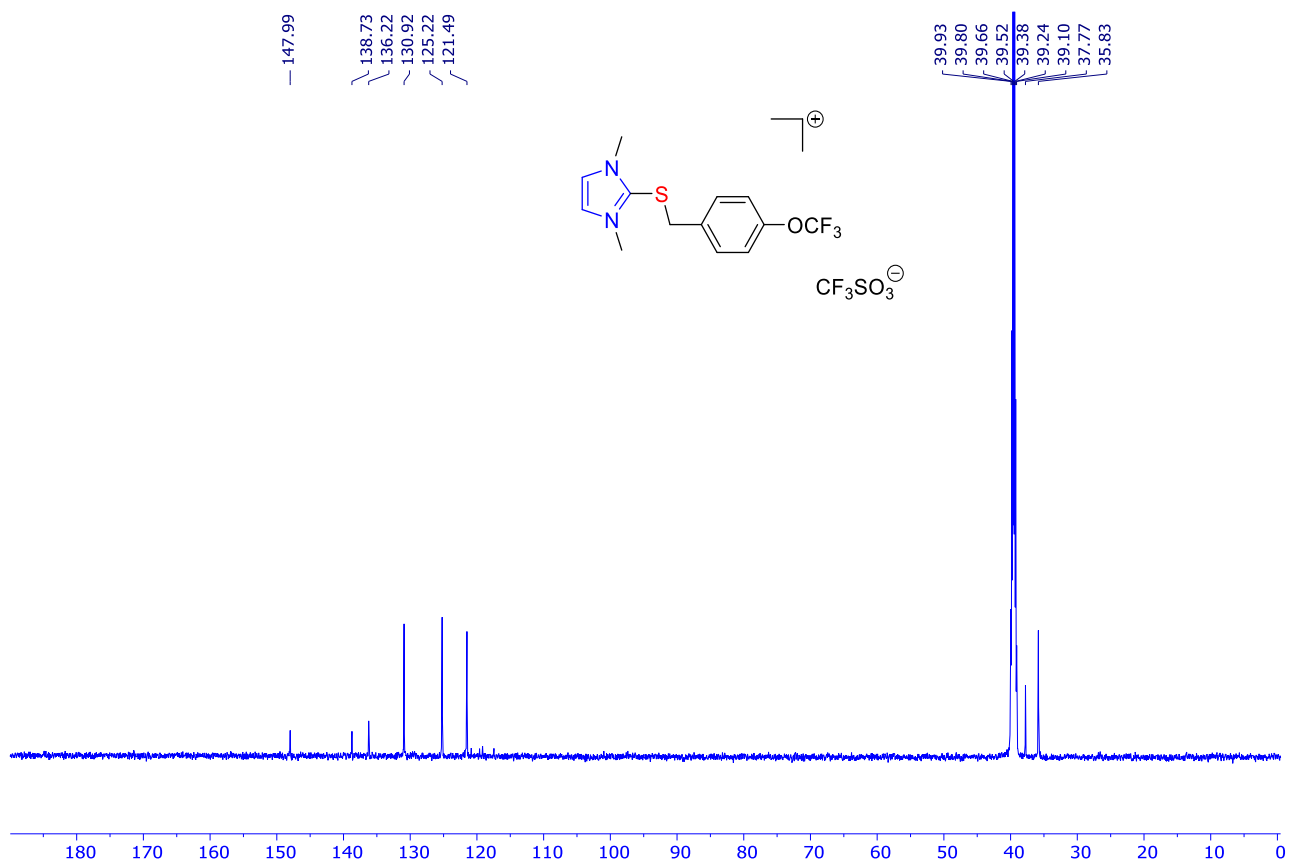

Fig. S58.  $^{13}\text{C}$  NMR spectrum of compound **5d** ( $\text{DMSO}-d_6$ , 600 MHz)

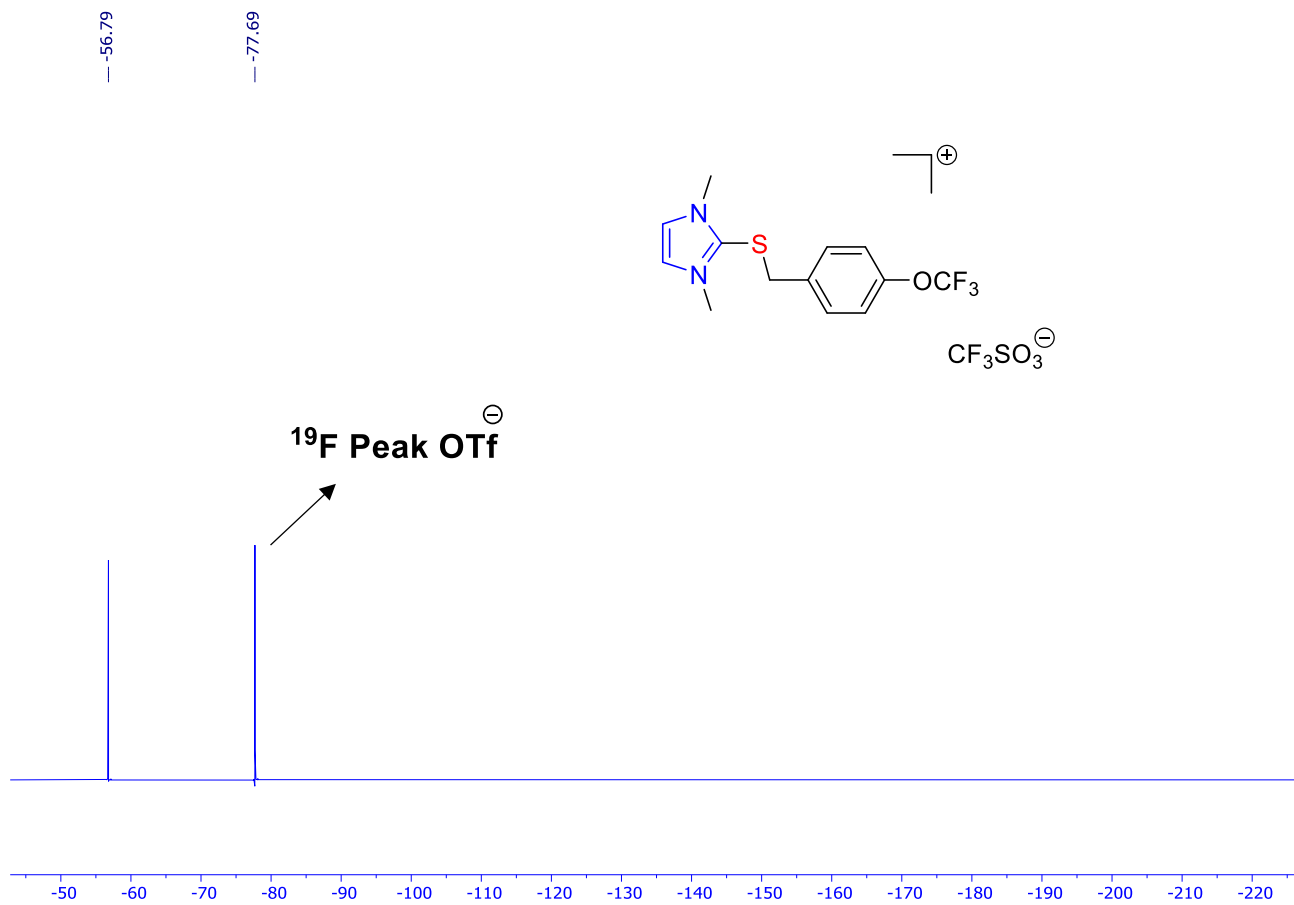

Fig. S59.  $^{19}\text{F}$  NMR spectrum of compound **5d** ( $\text{DMSO}-d_6$ , 600 MHz)

# 1,3-dimethyl-2-((4-(tert-butyl)benzyl)thio)-1H-imidazol-3-ium Triflate (6d)

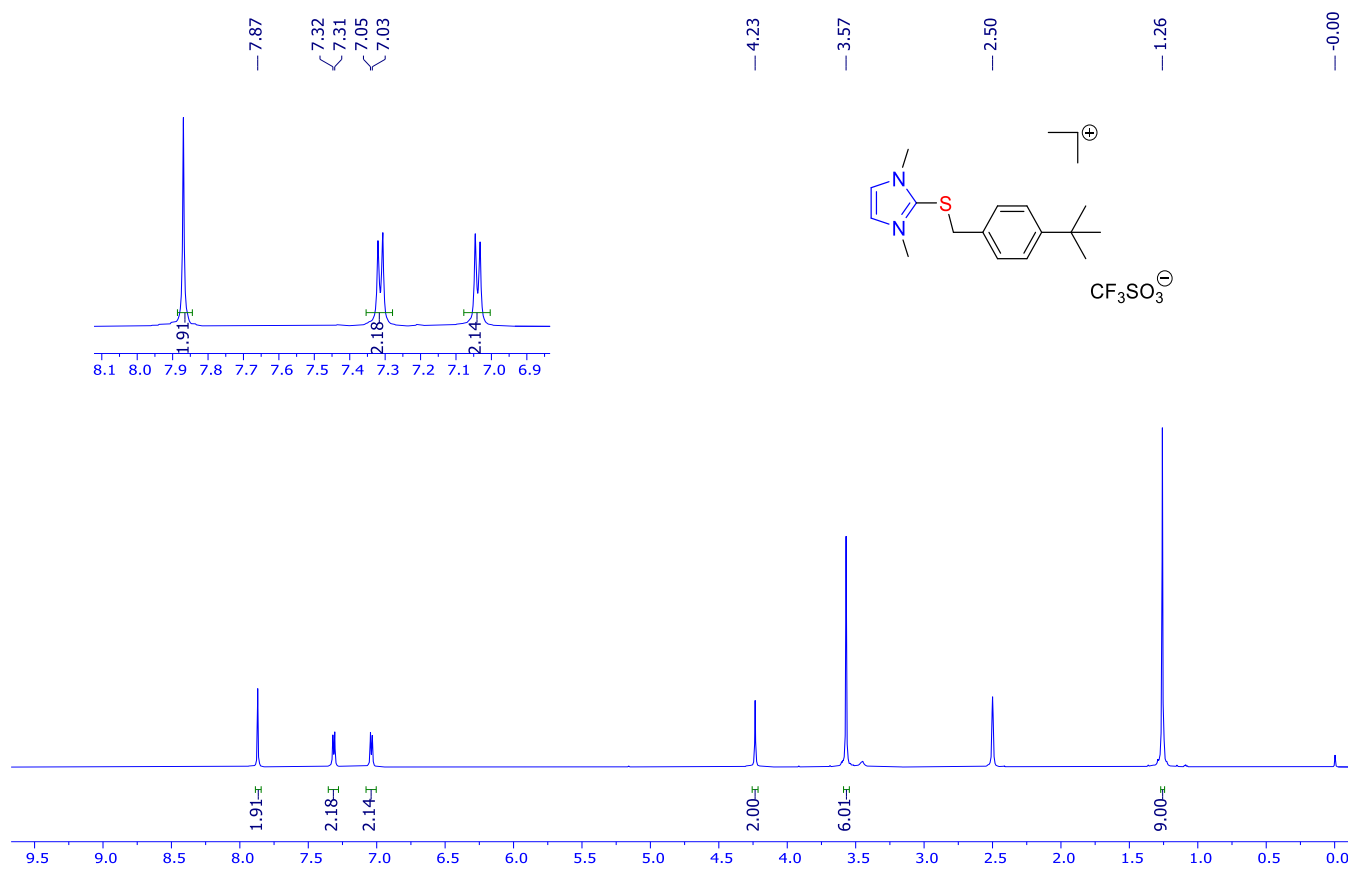

Fig. S60. <sup>1</sup>H NMR spectrum of compound **6d** (DMSO-*d*<sub>6</sub>, 600 MHz)

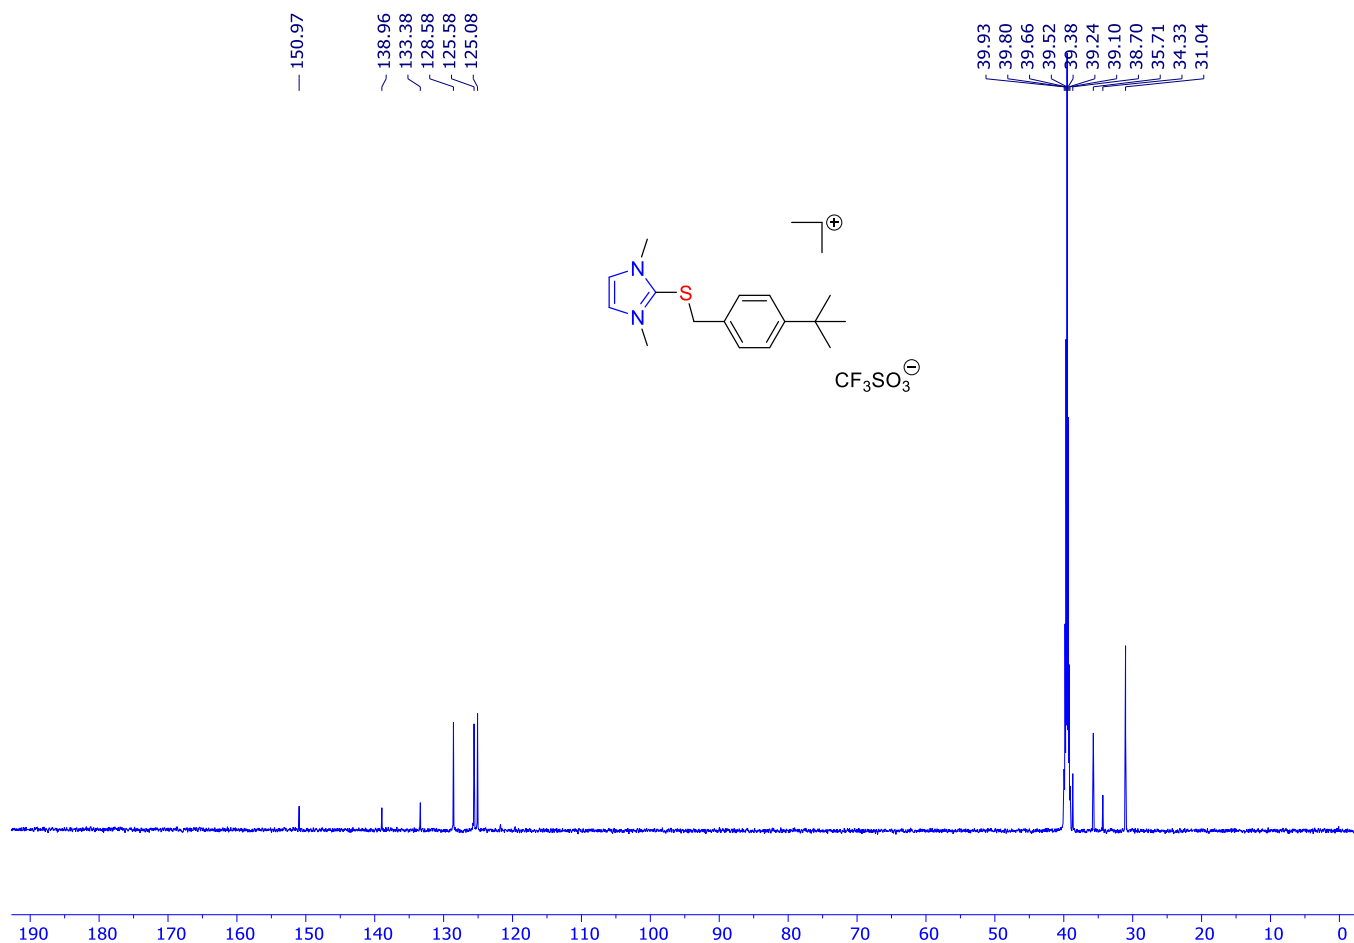

Fig. S61.  $^{13}\text{C}$  NMR spectrum of compound **6d** ( $\text{DMSO-}d_6$ , 600 MHz)

**1,3-dimethyl-2-((3-(trifluoromethyl)benzyl)thio)-1H-imidazol-3-ium Triflate (7d)**

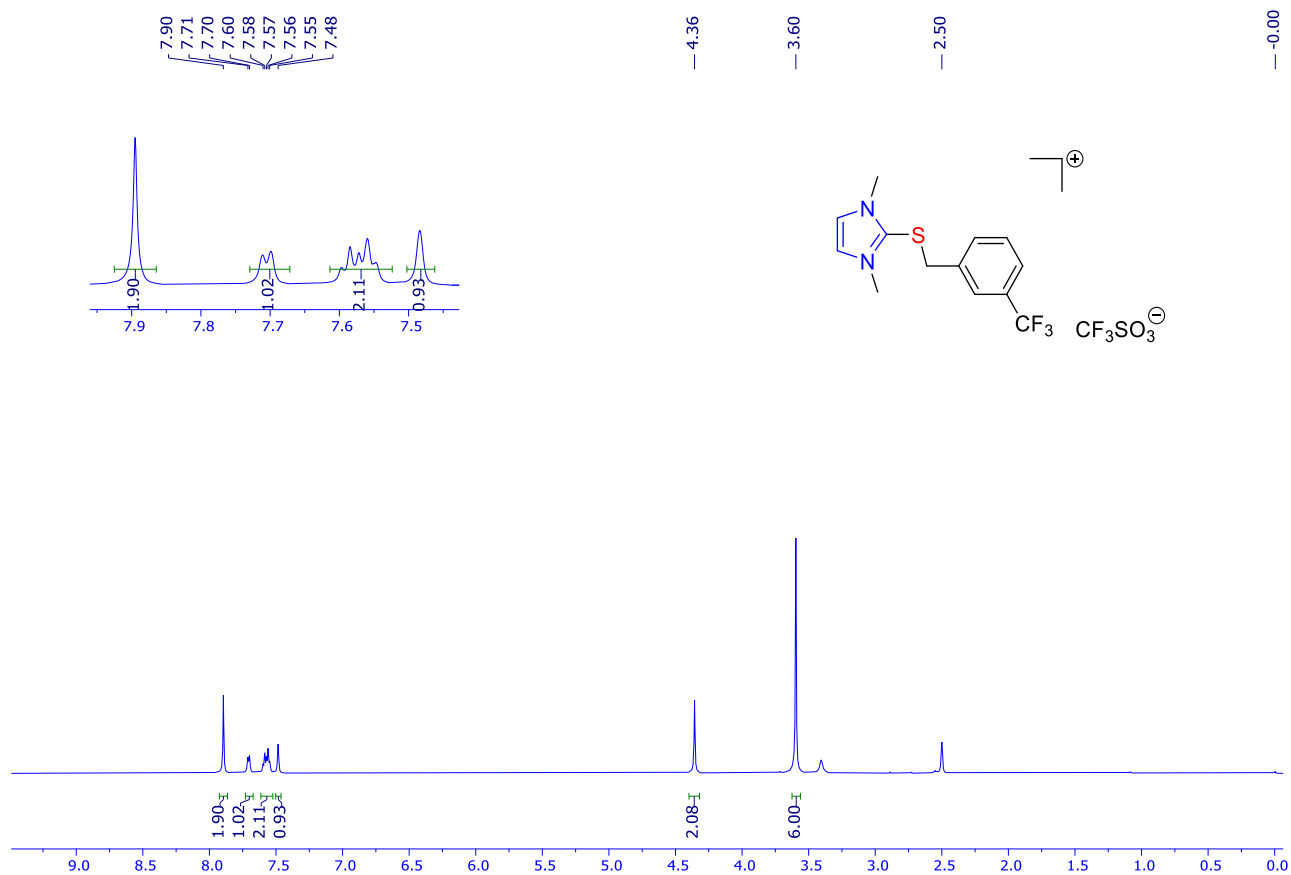

Fig. S62.  $^1\text{H}$  NMR spectrum of compound **7d** ( $\text{DMSO-}d_6$ , 600 MHz)

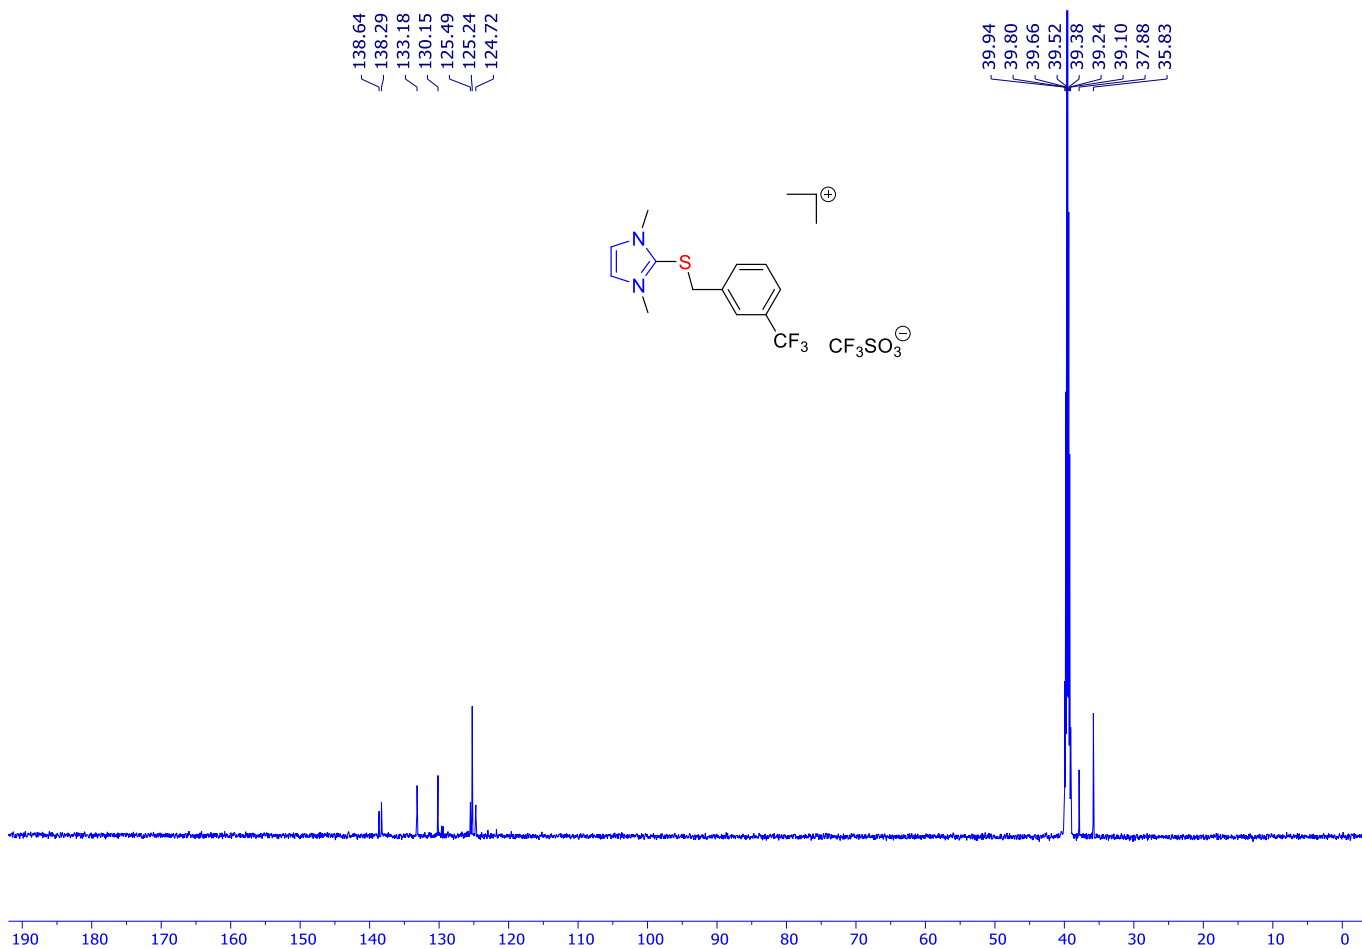

Fig. S63.  $^{13}\text{C}$  NMR spectrum of compound **7d** ( $\text{DMSO}-d_6$ , 600 MHz)

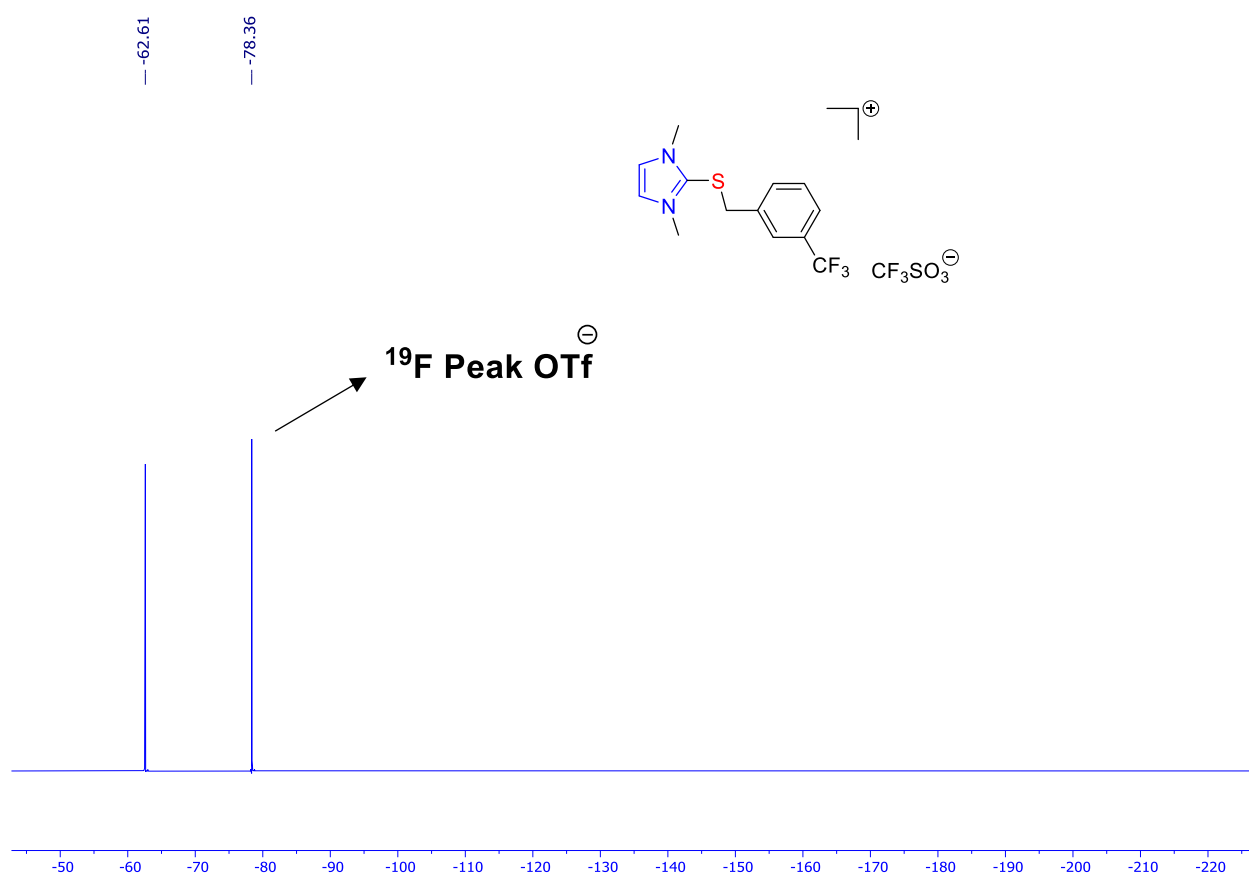

Fig. S64.  $^{19}\text{F}$  NMR spectrum of compound **7d** (DMSO- $d_6$ , 600 MHz)

# 1,3-dimethyl-2-((4-nitrobenzyl)thio)-1H-imidazol-3-ium Triflate (8d)

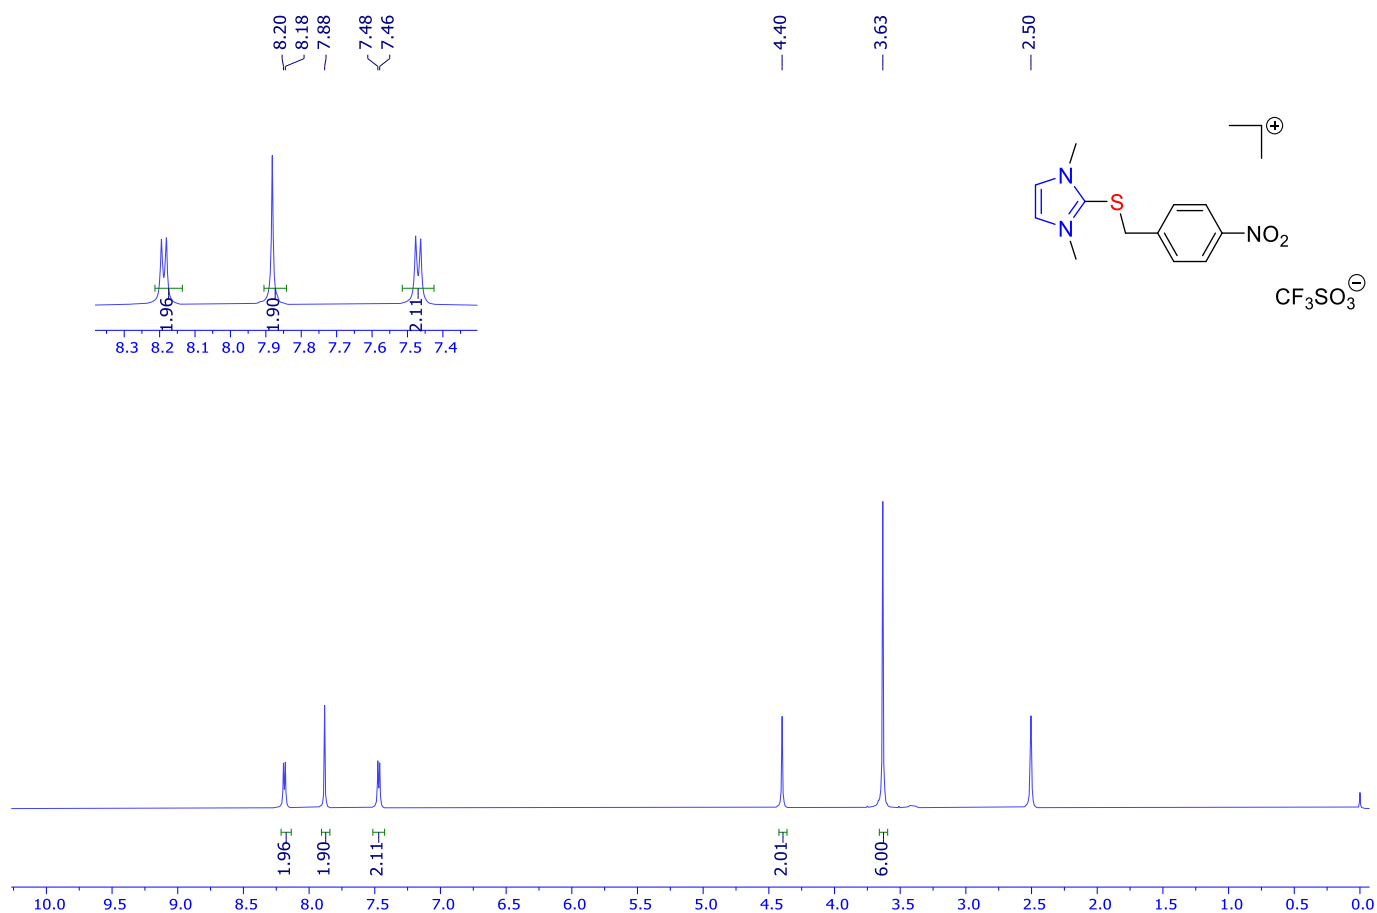

Fig. S65. <sup>1</sup>H NMR spectrum of compound **8d** (DMSO-*d*<sub>6</sub>, 600 MHz)



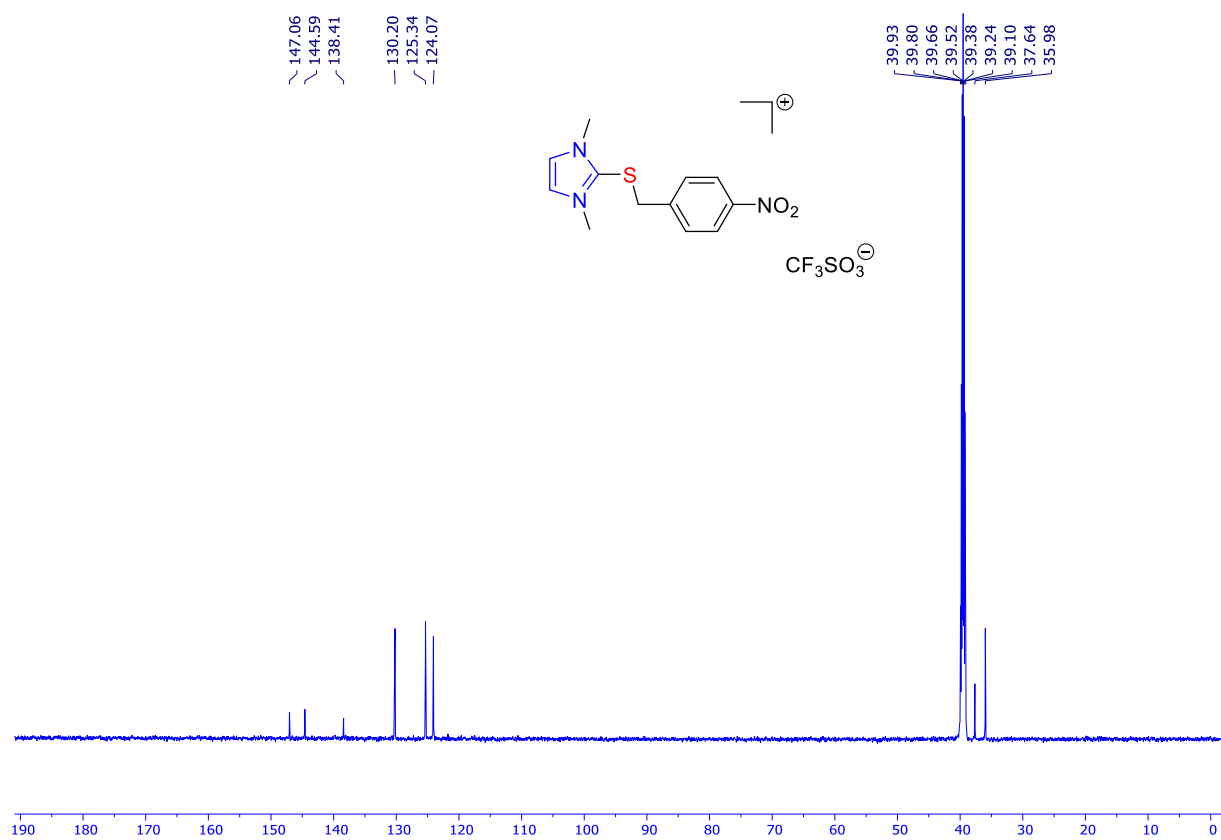

Fig. S66.  $^{13}\text{C}$  NMR spectrum of compound **8d** (DMSO- $d_6$ , 600 MHz)

**1,3-dimethyl-2-((2-chloro-4-fluorobenzyl)sulfinyl)-1H-imidazol-3-ium Triflate (1e)**

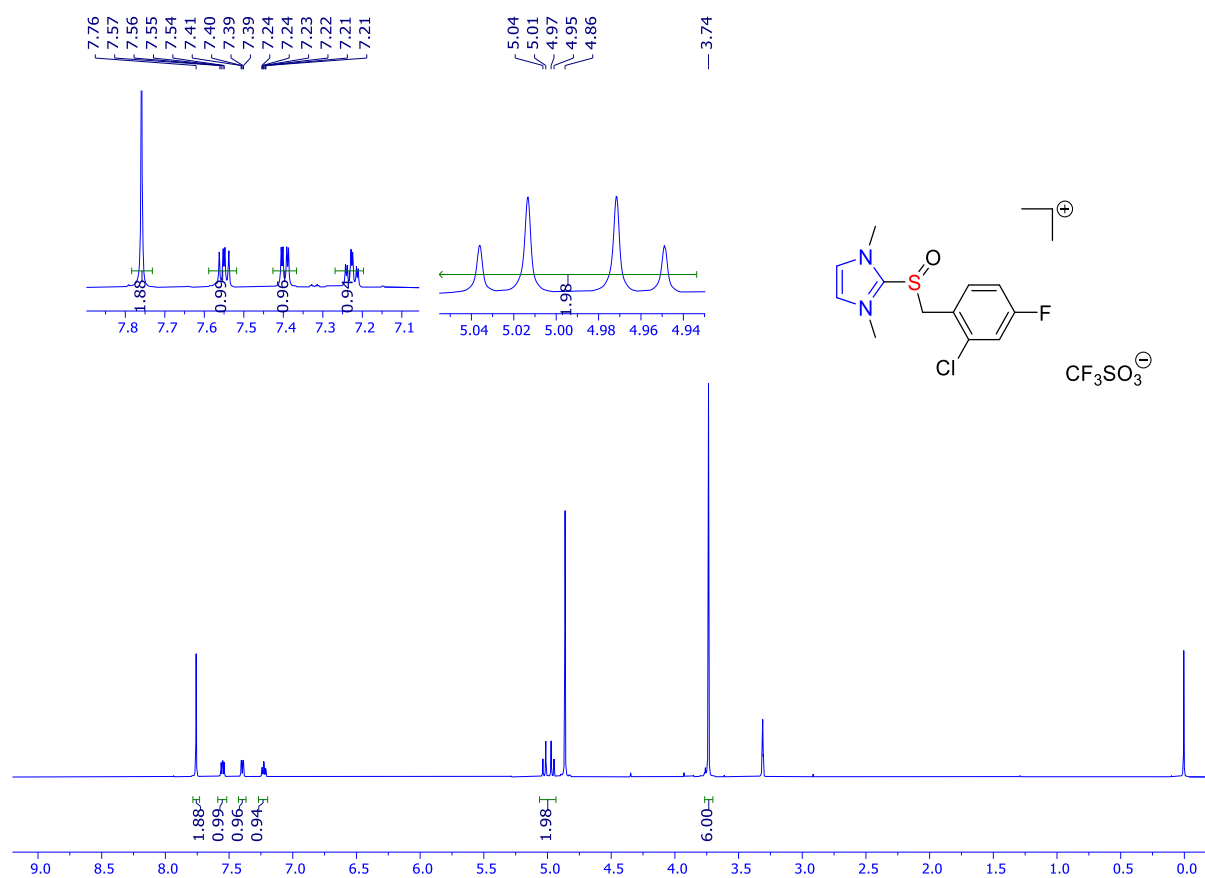

Fig. S67. <sup>1</sup>H NMR spectrum of compound **1e** (CD<sub>3</sub>OD, 600 MHz)

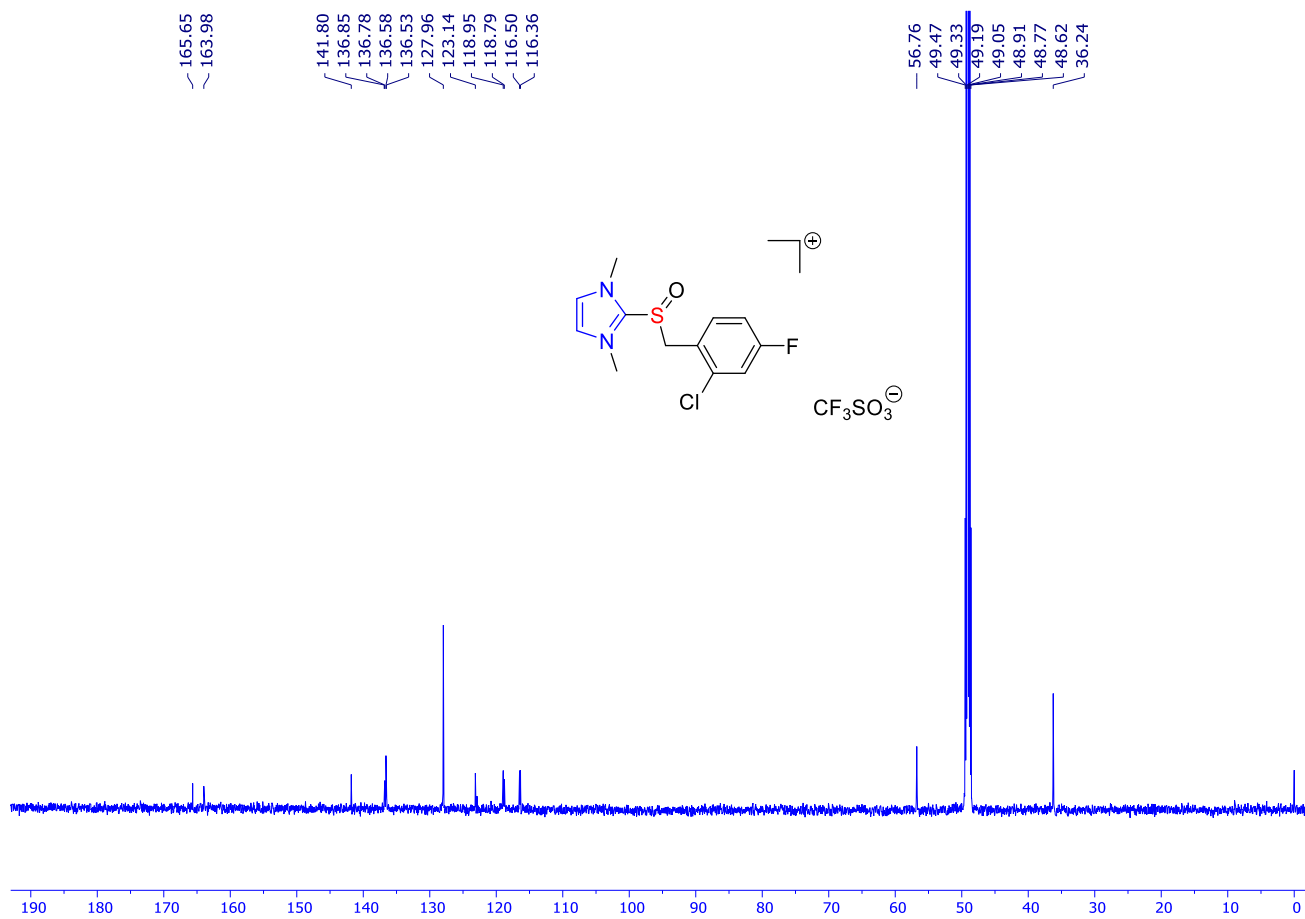

Fig. S68.  $^{13}\text{C}$  NMR spectrum of compound **1e** ( $\text{CD}_3\text{OD}$ , 600 MHz)

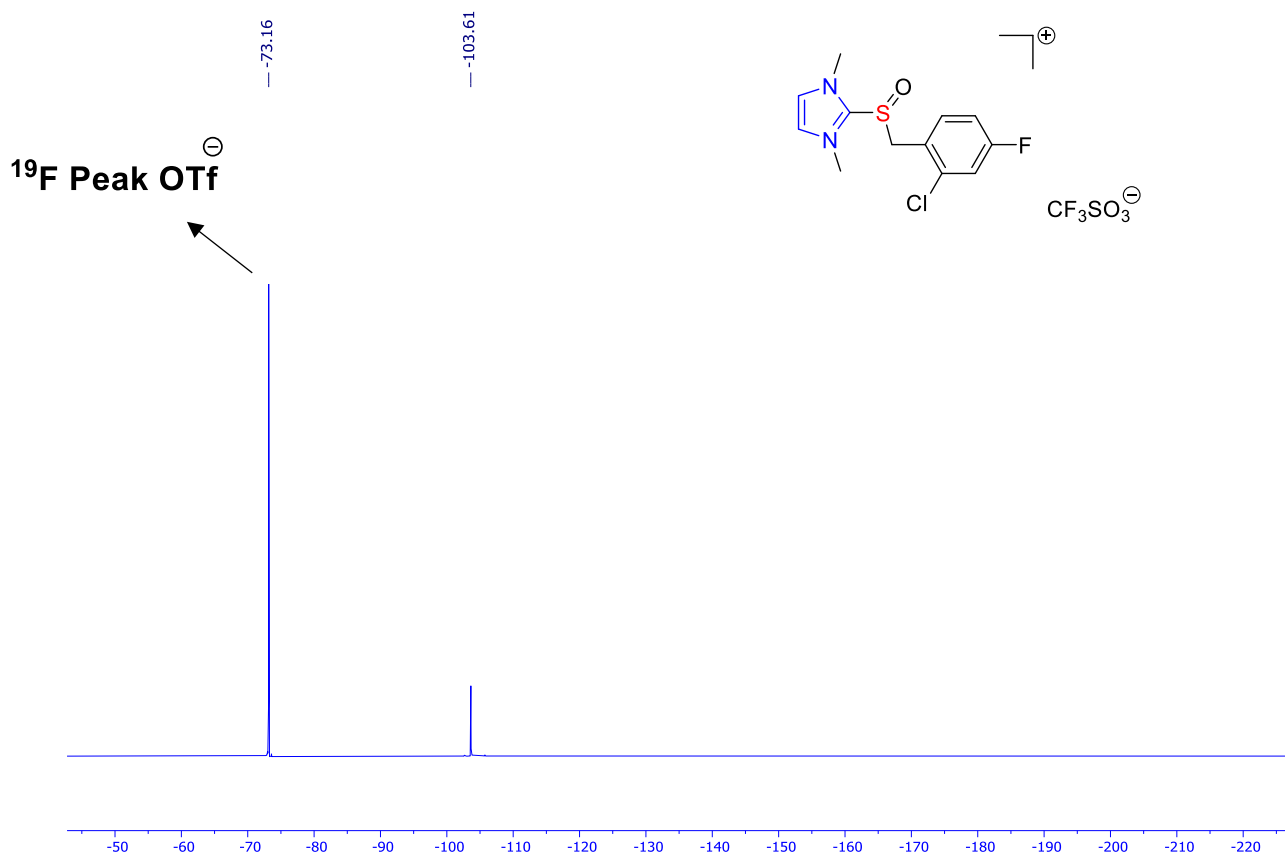

Fig. S69.  $^{19}\text{F}$  NMR spectrum of compound **1e** ( $\text{CD}_3\text{OD}$ , 600 MHz)

### 1,3-dimethyl-2-(benzylsulfinyl)-1H-imidazol-3-ium Triflate (2e)

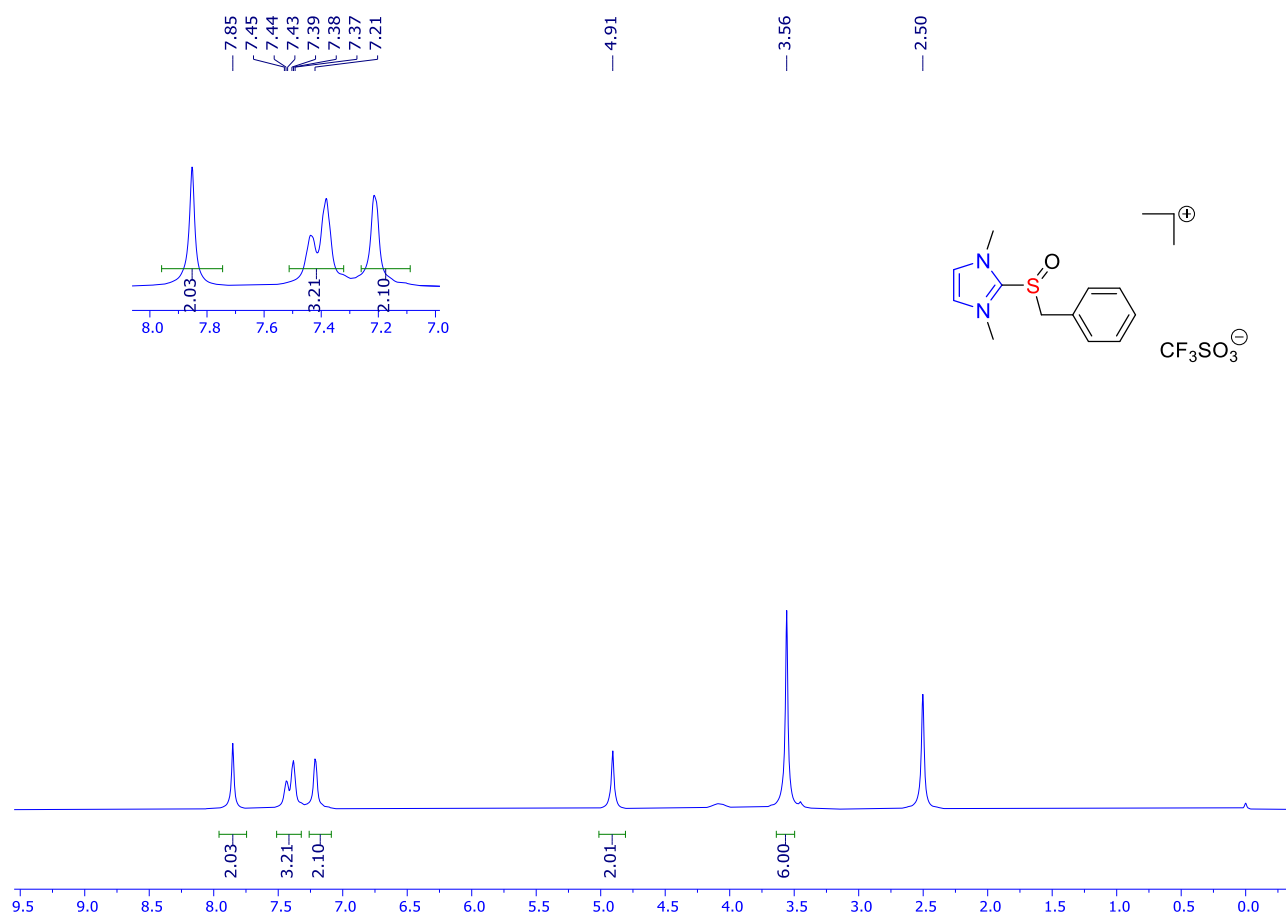

Fig. S70. <sup>1</sup>H NMR spectrum of compound **2e** (DMSO-*d*<sub>6</sub>, 600 MHz)

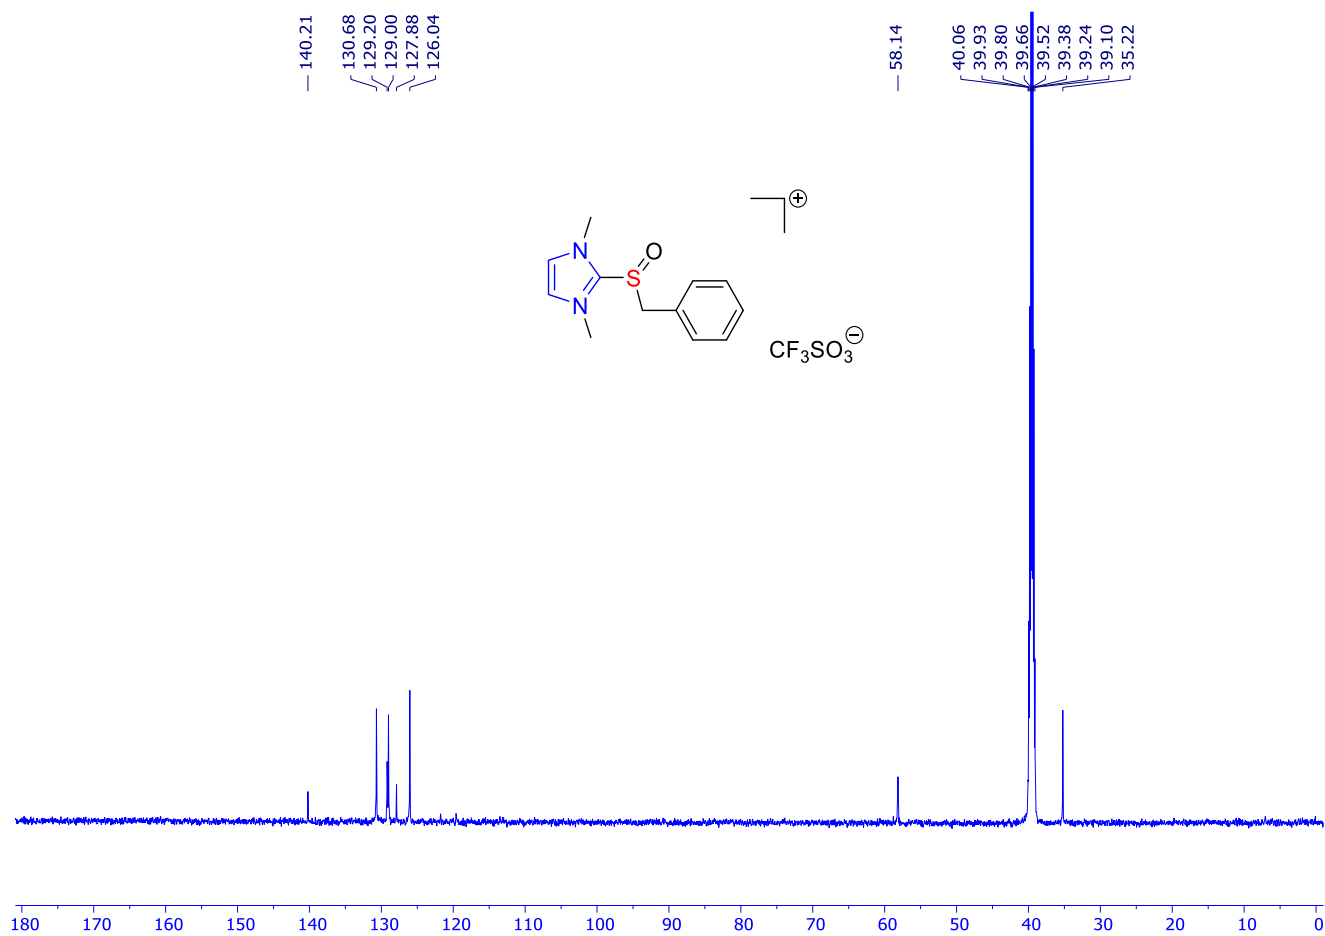

Fig. S71.  $^{13}\text{C}$  NMR spectrum of compound **2e** ( $\text{DMSO-}d_6$ , 600 MHz)

### 1,3-dimethyl-2-(benzylsulfinyl)-1H-imidazol-3-ium Triflate (2e)

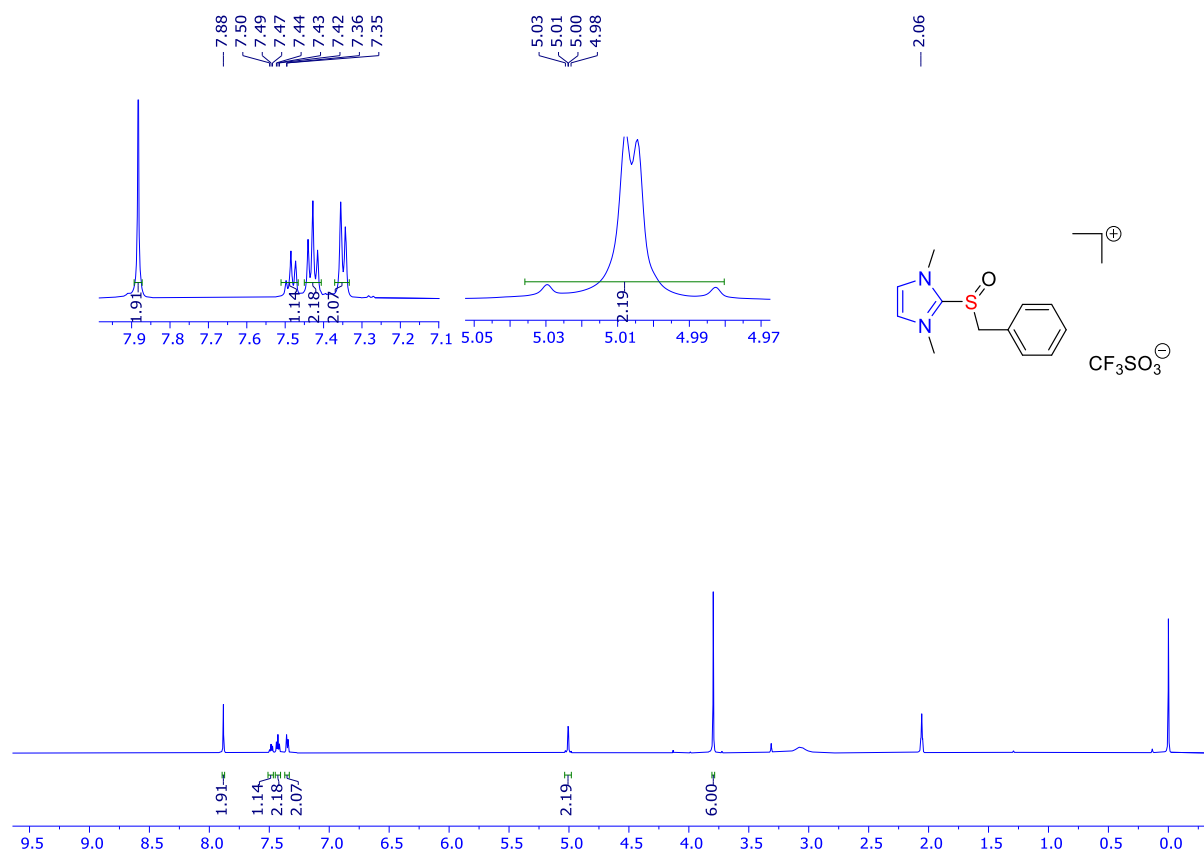

Fig. S72. <sup>1</sup>H NMR spectrum of compound **2e** ((CD<sub>3</sub>)<sub>2</sub>CO, 600 MHz)

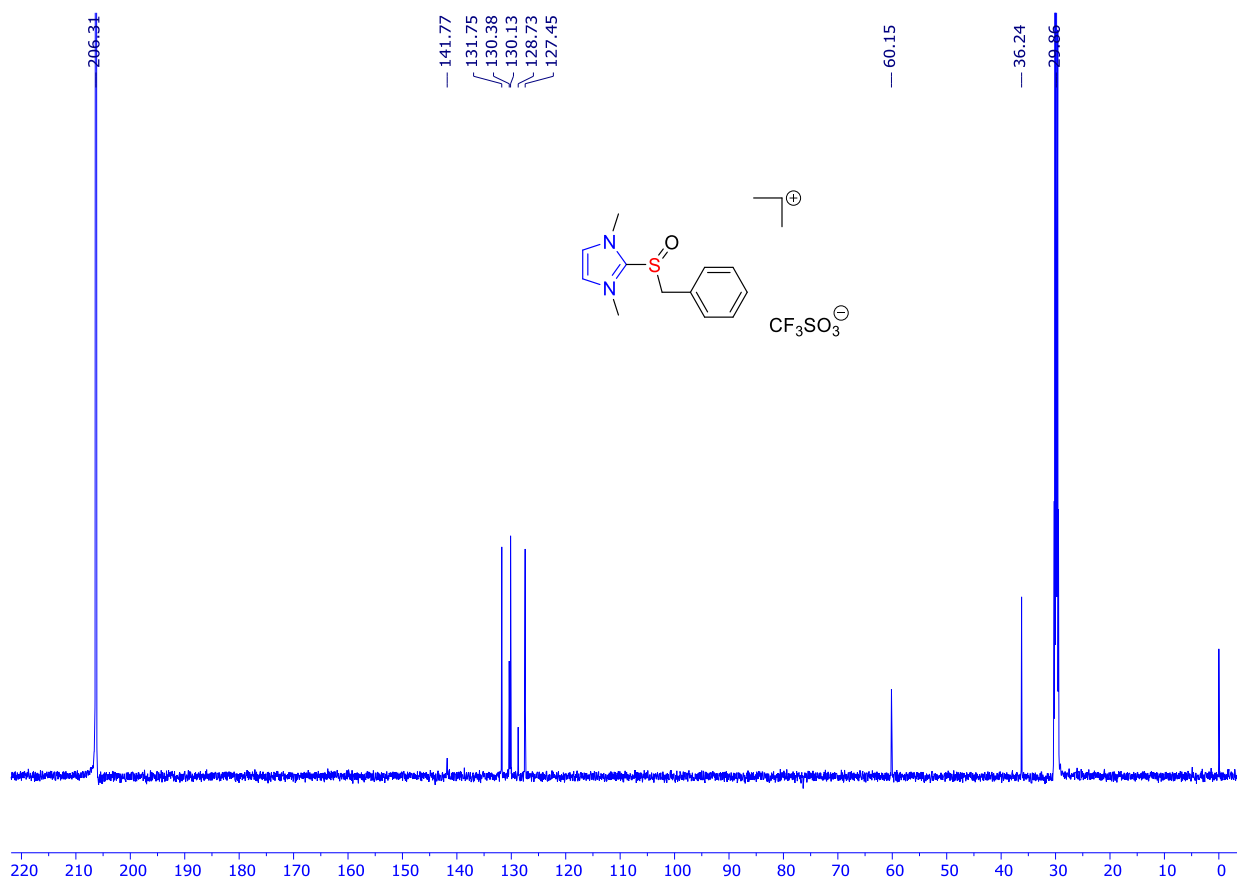

Fig. S73. <sup>13</sup>C NMR spectrum of compound **2e** ((CD<sub>3</sub>)<sub>2</sub>CO, 600 MHz)



### 1,3-dimethyl-2-((4-bromobenzyl)sulfinyl)-1H-imidazol-3-ium Triflate (3e)

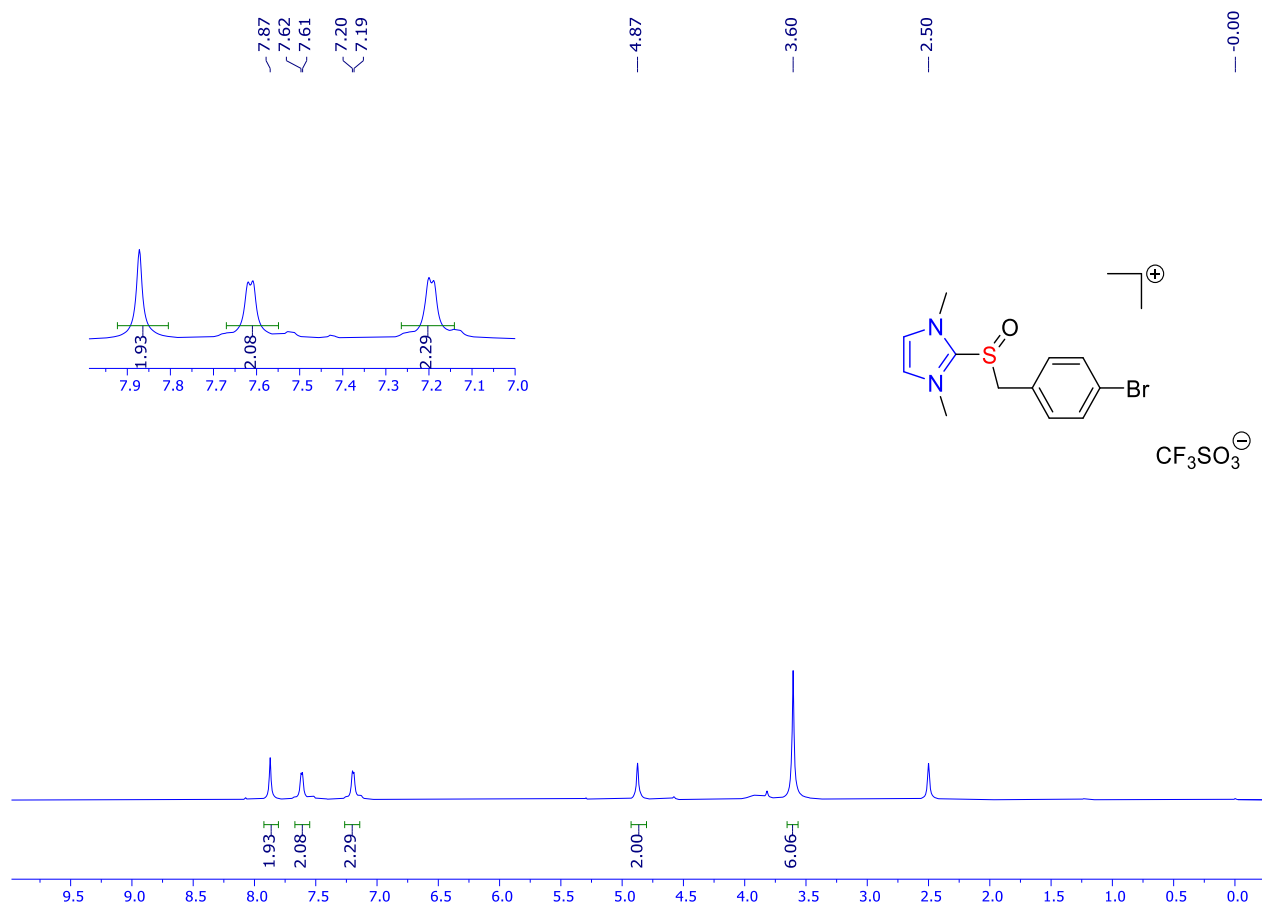

Fig. S74. <sup>1</sup>H NMR spectrum of compound 3e (DMSO-*d*<sub>6</sub>, 600 MHz)

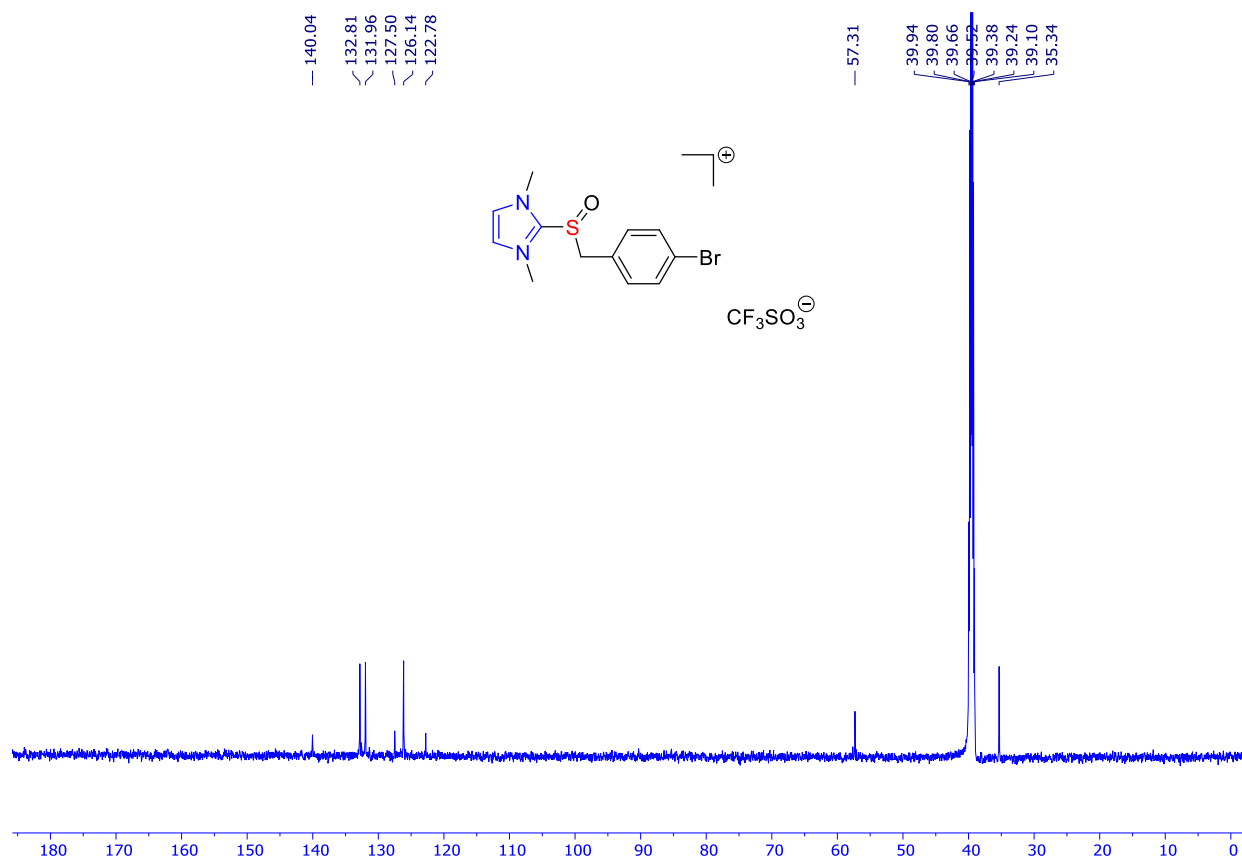

Fig. S75.  $^{13}\text{C}$  NMR spectrum of compound **3e** (DMSO- $d_6$ , 600 MHz)

### 1,3-dimethyl-2-((4-bromobenzyl)sulfinyl)-1H-imidazol-3-ium Triflate (3e)

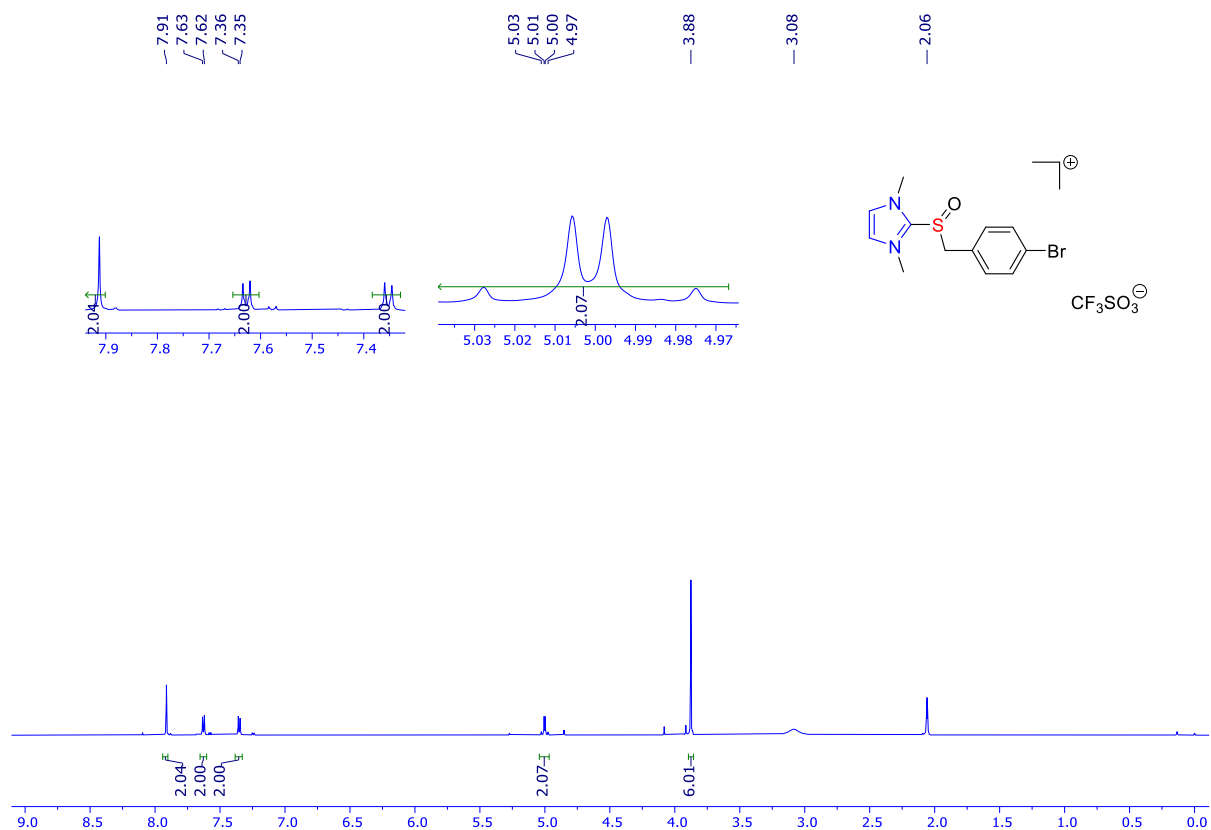

Fig. S76. <sup>1</sup>H NMR spectrum of compound **3e** ((CD<sub>3</sub>)<sub>2</sub>CO, 600 MHz)

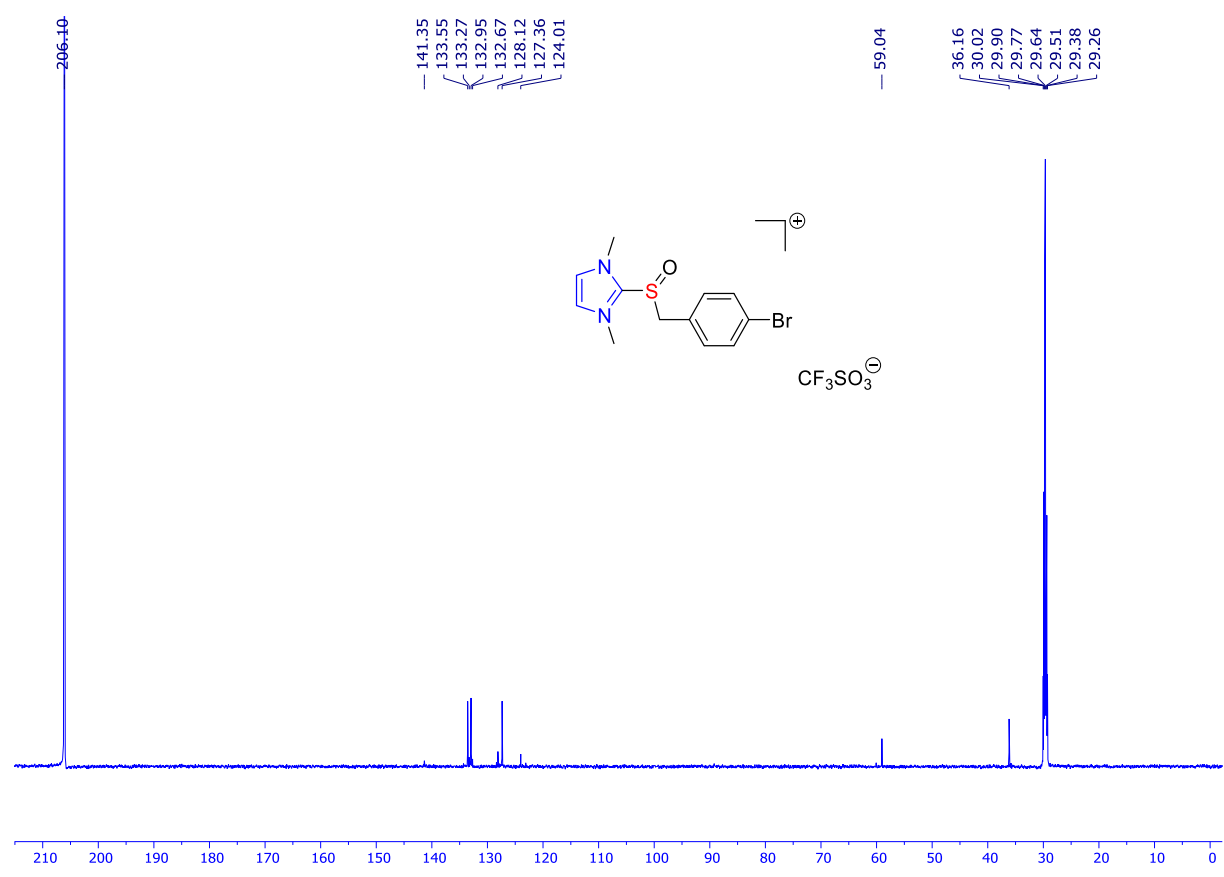

Fig. S77. <sup>13</sup>C NMR spectrum of compound **3e** ((CD<sub>3</sub>)<sub>2</sub>CO, 600 MHz)

**1,3-dimethyl-2-((2-fluoro-4-bromobenzyl)sulfinyl)-1H-imidazol-3-iumTriflate (4e)**

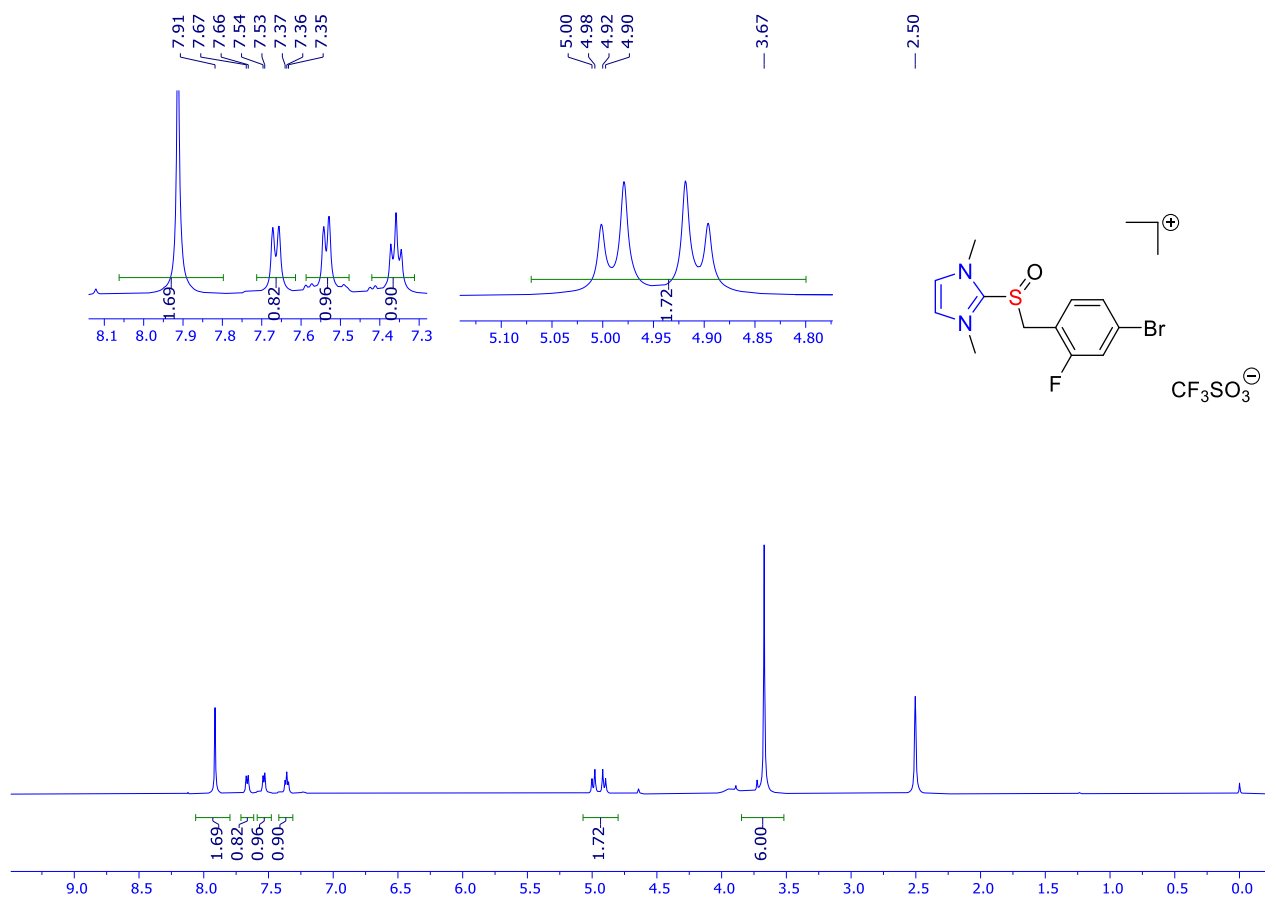

Fig. S78.  $^1\text{H}$  NMR spectrum of compound **4e** ( $\text{DMSO-}d_6$ , 600 MHz)

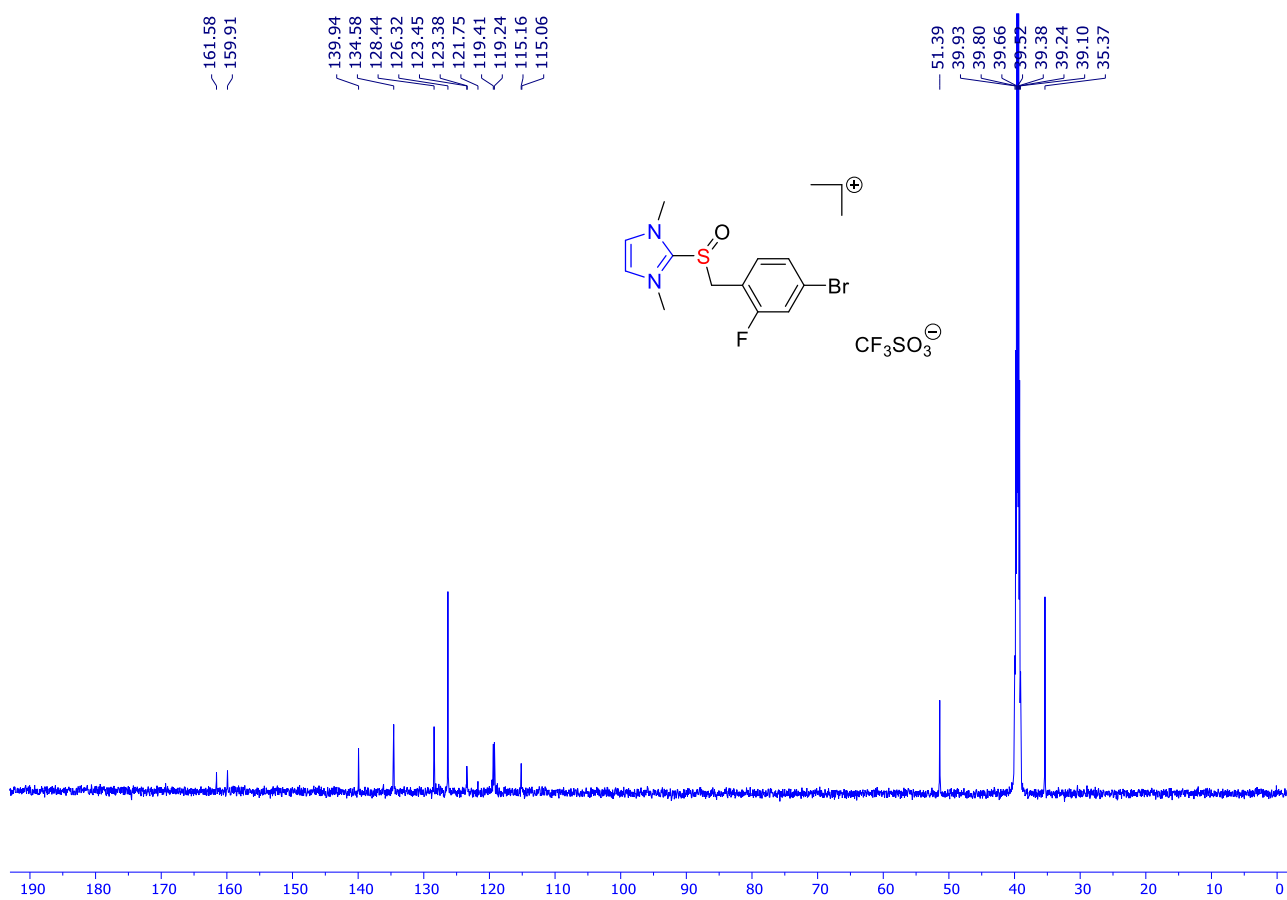

Fig. S79.  $^{13}\text{C}$  NMR spectrum of compound **4e** ( $\text{DMSO-}d_6$ , 600 MHz)

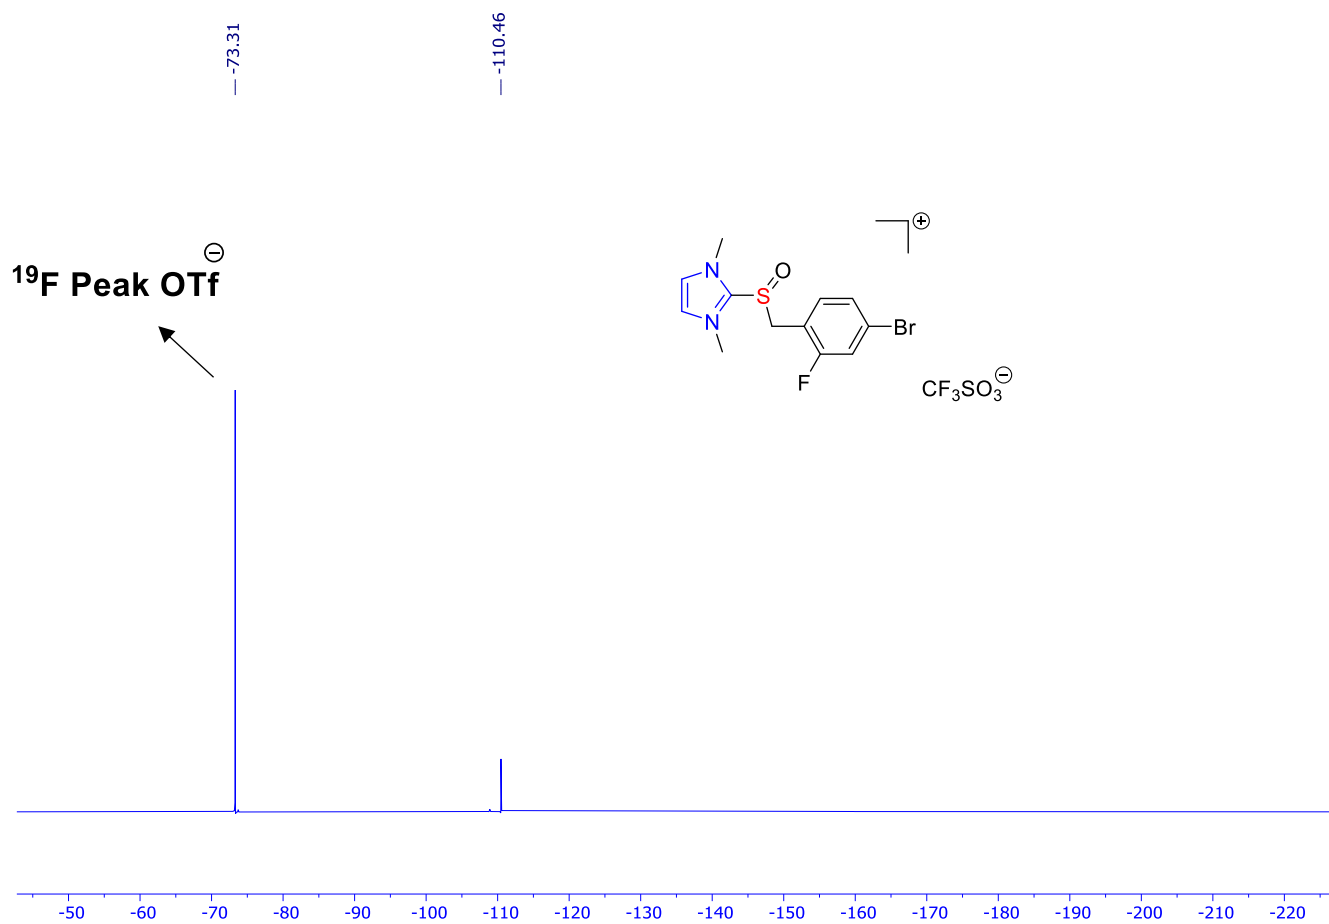

Fig. S80.  $^{19}\text{F}$  NMR spectrum of compound **4e** ( $\text{DMSO-}d_6$ , 600 MHz)

**1,3-dimethyl-2-((4-(trifluoromethoxy)benzyl)sulfinyl)-1H-imidazol-3-iumTriflate (5e)**

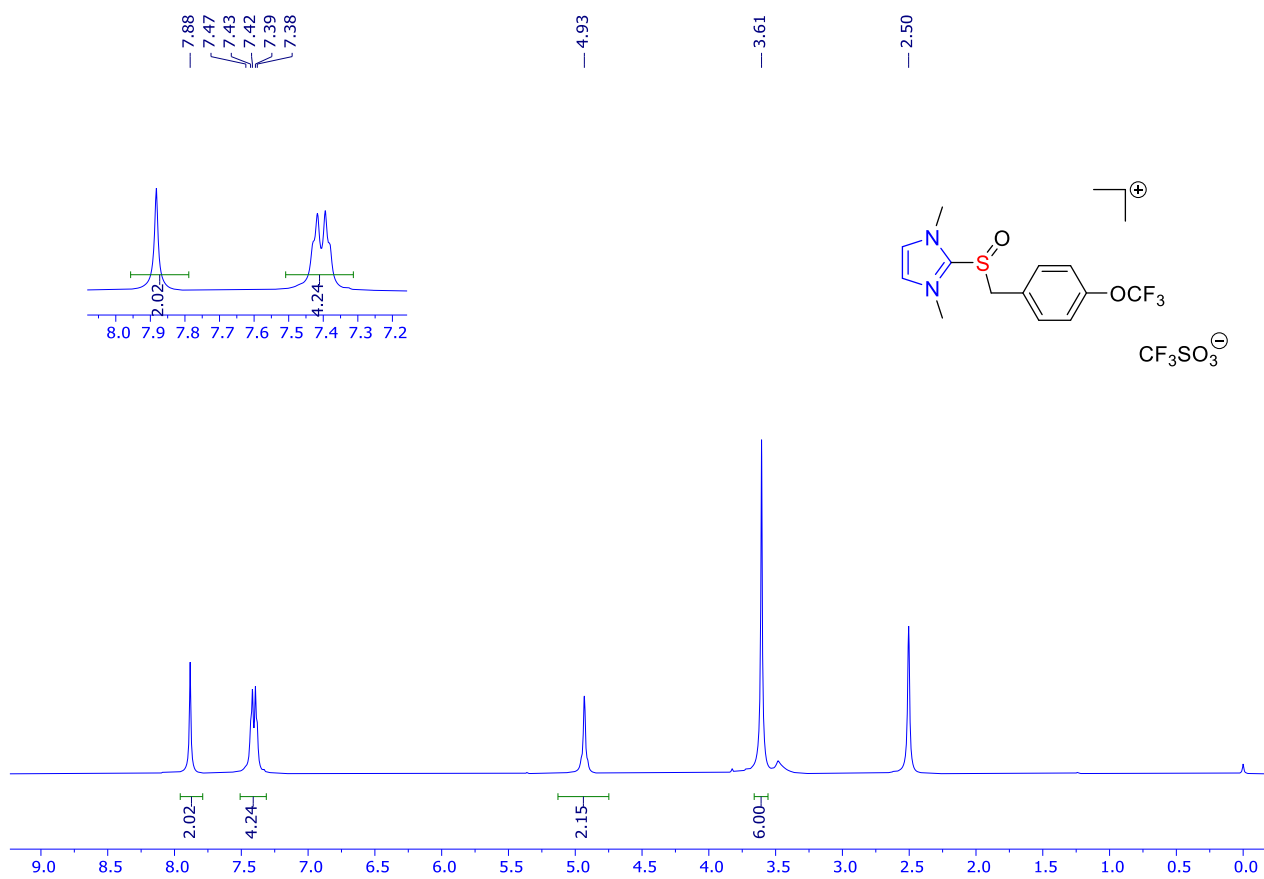

Fig. S81. <sup>1</sup>H NMR spectrum of compound **5e** (DMSO-*d*<sub>6</sub>, 600 MHz)



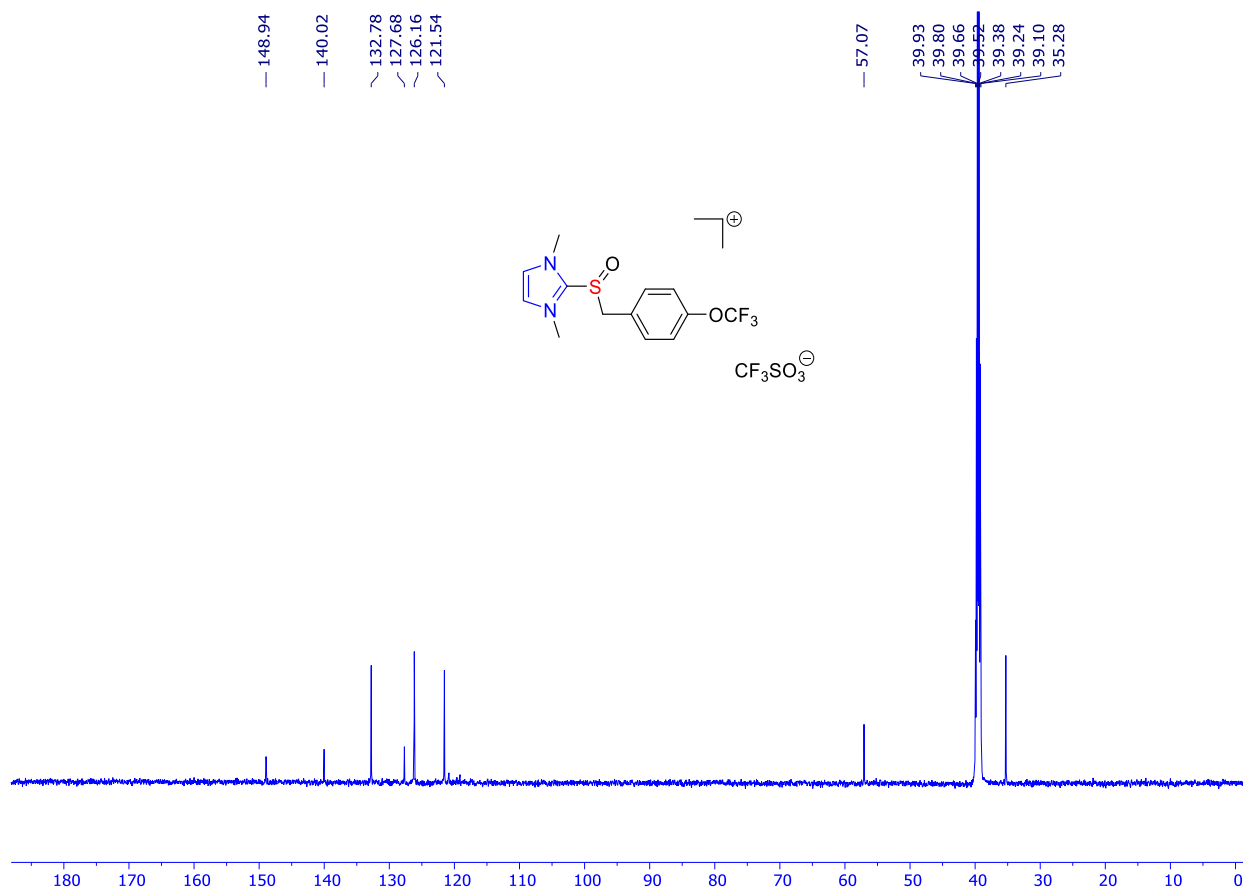

Fig. S82. <sup>13</sup>C NMR spectrum of compound **5e** (DMSO-*d*<sub>6</sub>, 600 MHz)

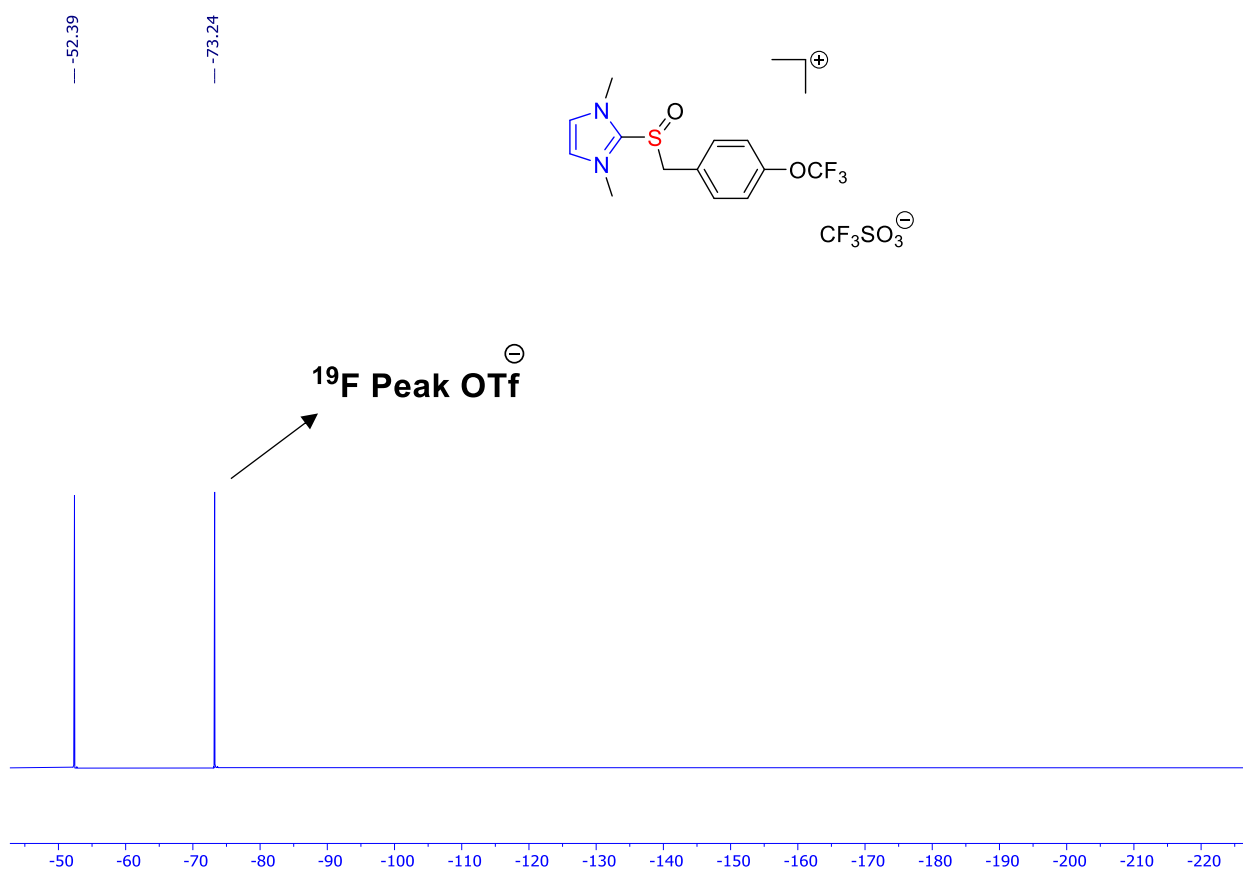

Fig. S83.  $^{19}\text{F}$  NMR spectrum of compound **5e** ( $\text{DMSO-}d_6$ , 600 MHz)

**1,3-dimethyl-2-((4-(trifluoromethoxy)benzyl)sulfinyl)-1H-imidazol-3-iumTriflate (5e)**

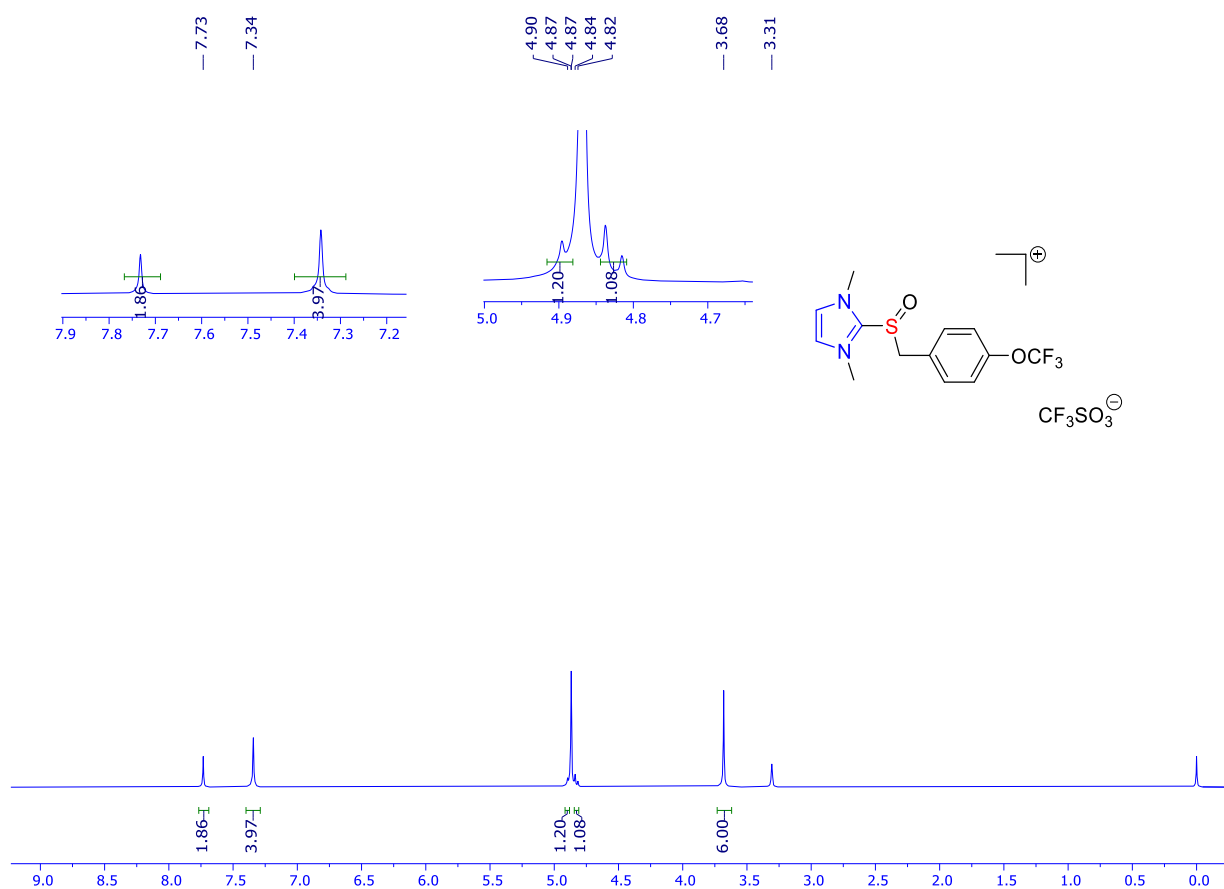

Fig. S84.  $^1\text{H}$  NMR spectrum of compound **5e** ( $\text{CD}_3\text{OD}$ , 600 MHz)

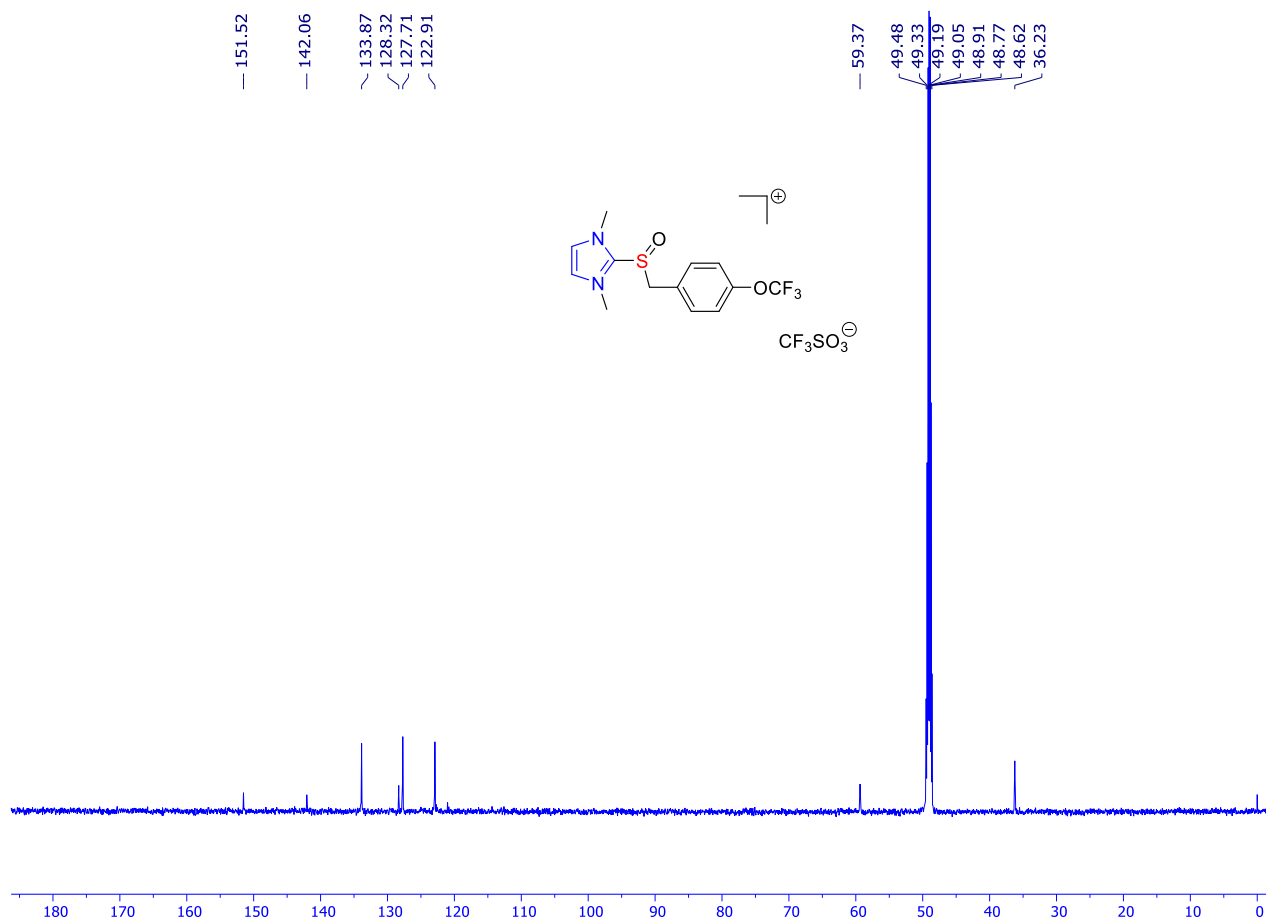

Fig. S85.  $^{13}\text{C}$  NMR spectrum of compound **5e** ( $\text{CD}_3\text{OD}$ , 600 MHz)

**1,3-dimethyl-2-((4-(tert-butyl)benzyl)sulfinyl)-1H-imidazol-3-ium Triflate (6e)**

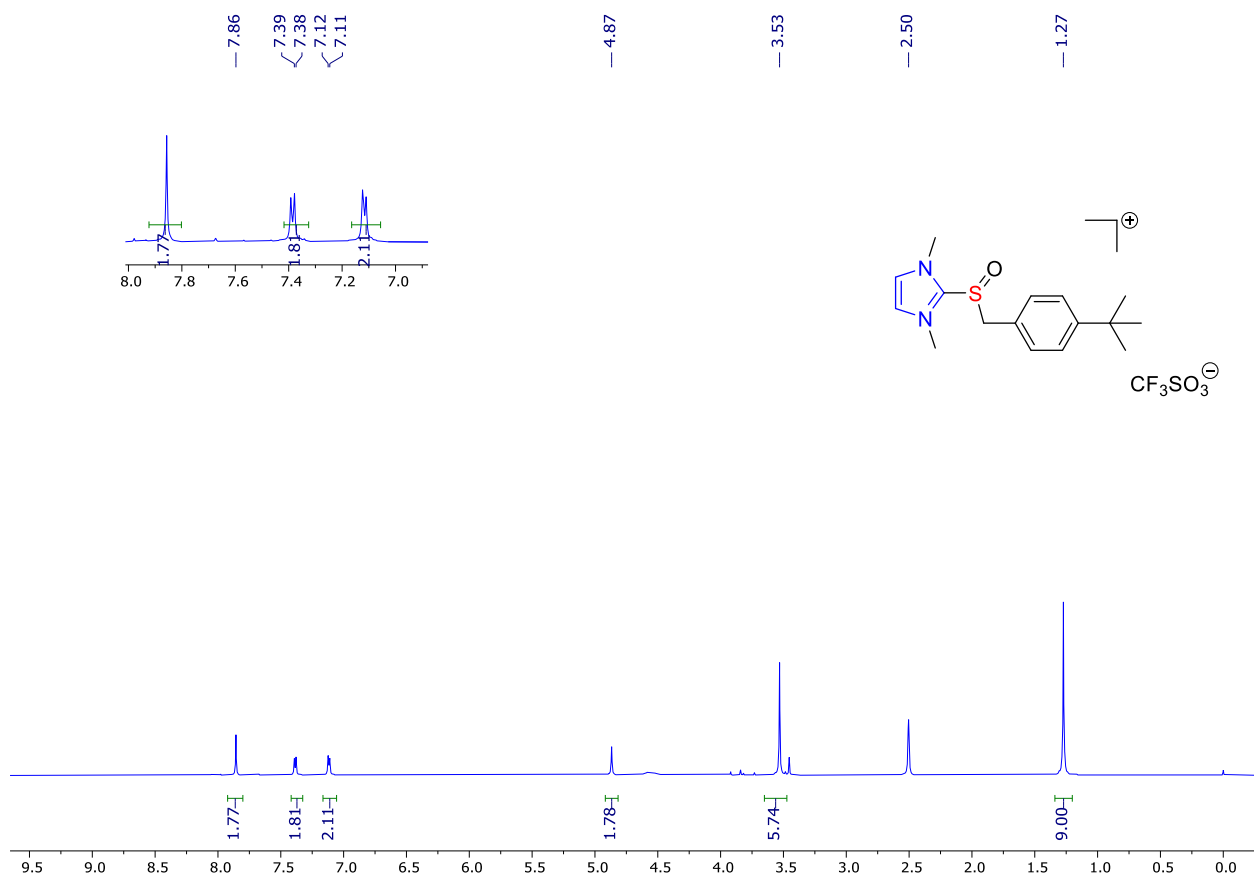

Fig. S86. <sup>1</sup>H NMR spectrum of compound **6e** (DMSO-*d*<sub>6</sub>, 600 MHz)

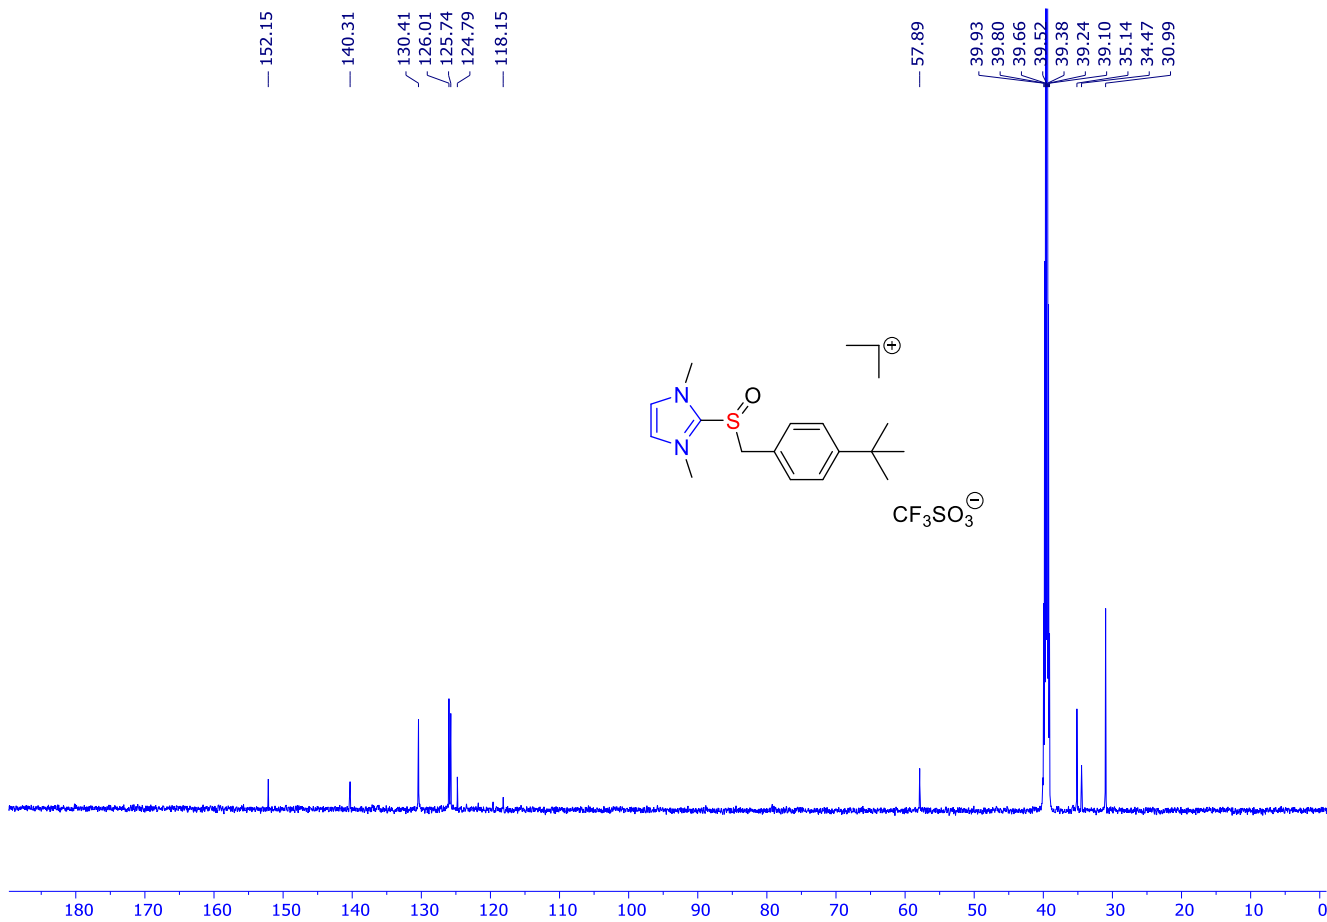

Fig. S87.  $^{13}\text{C}$  NMR spectrum of compound **6e** (DMSO- $d_6$ , 600 MHz)

**1,3-dimethyl-2-((4-(tert-butyl)benzyl)sulfinyl)-1H-imidazol-3-ium Triflate (6e)**

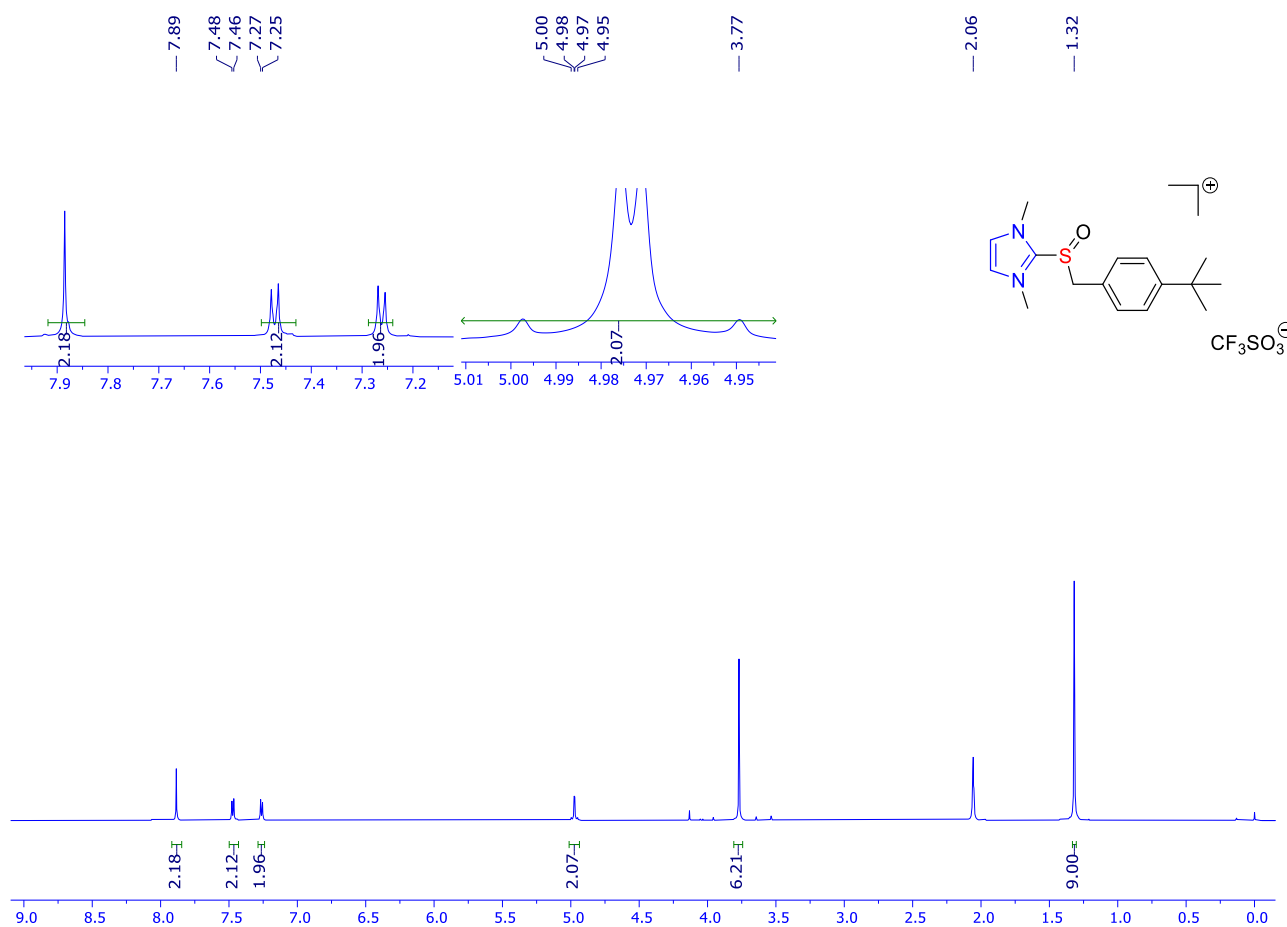

Fig. S88. <sup>1</sup>H NMR spectrum of compound **6e** ((CD<sub>3</sub>)<sub>2</sub>CO, 600 MHz)

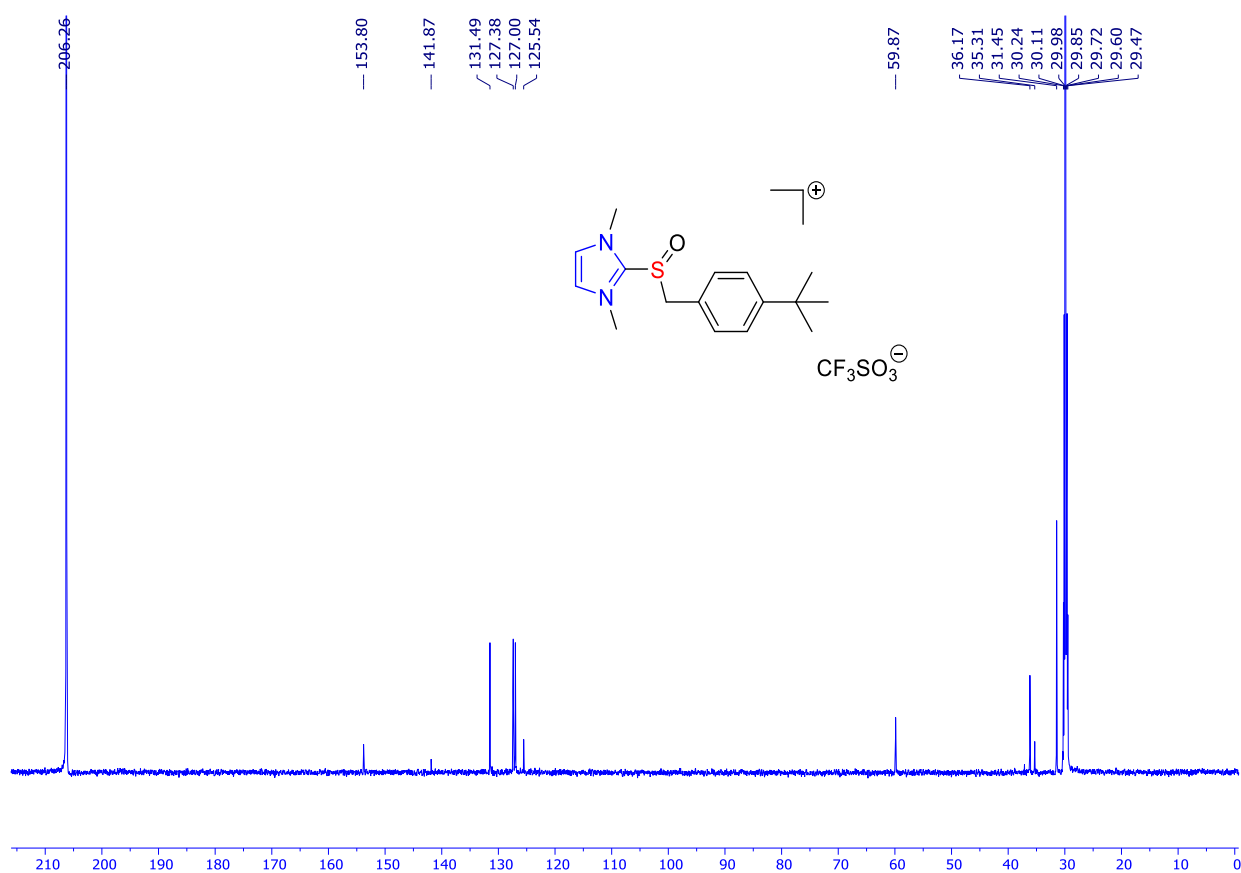

Fig. S89.  $^{13}\text{C}$  NMR spectrum of compound **6e** ( $(\text{CD}_3)_2\text{CO}$ , 600 MHz)



1,3-dimethyl-2-((3-(trifluoromethyl)benzyl)sulfinyl)-1H-imidazol-3-ium Triflate (7e)

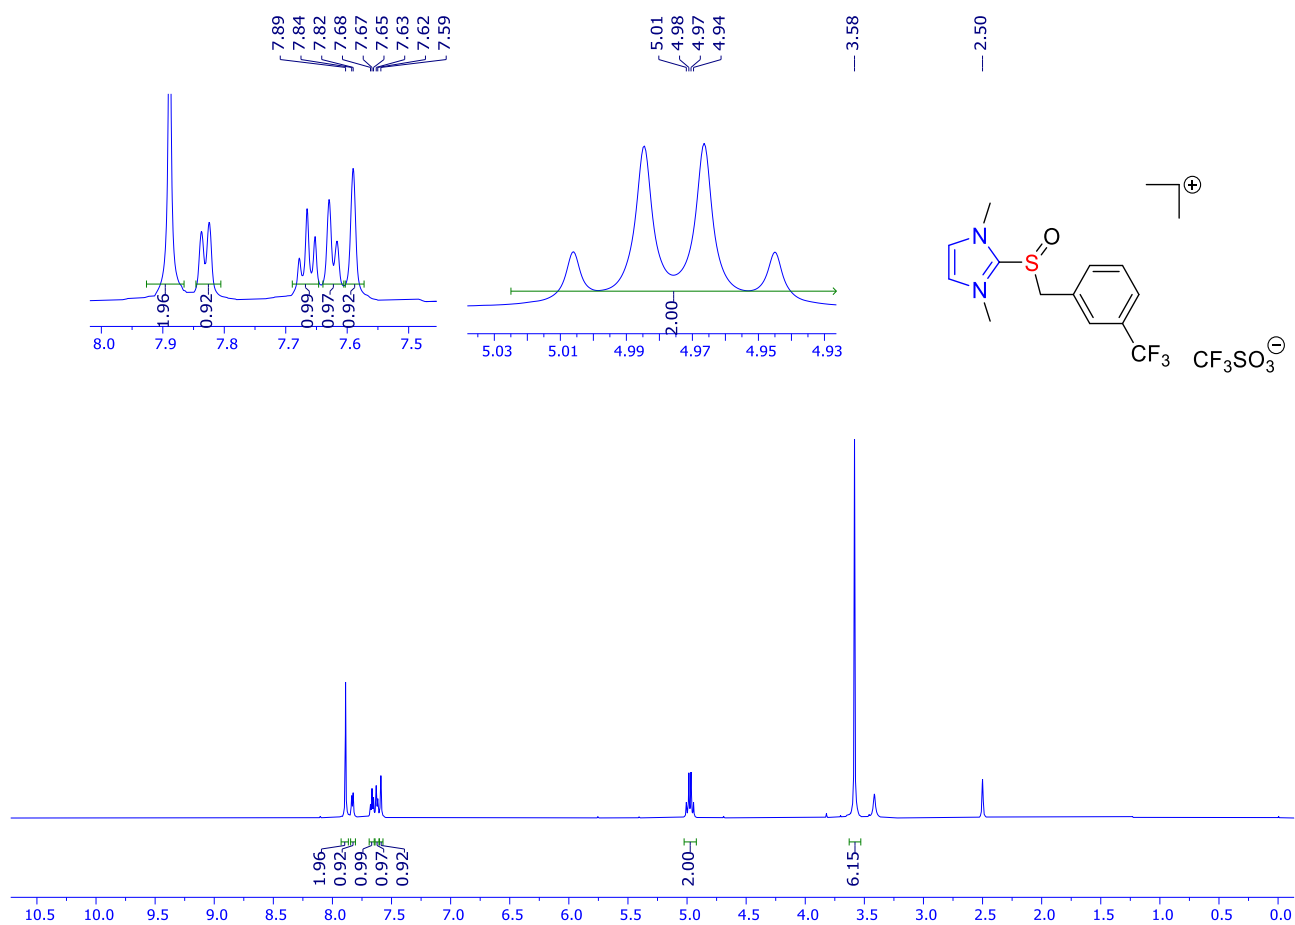

Fig. S90. <sup>1</sup>H NMR spectrum of compound 7e (DMSO-*d*<sub>6</sub>, 600 MHz)

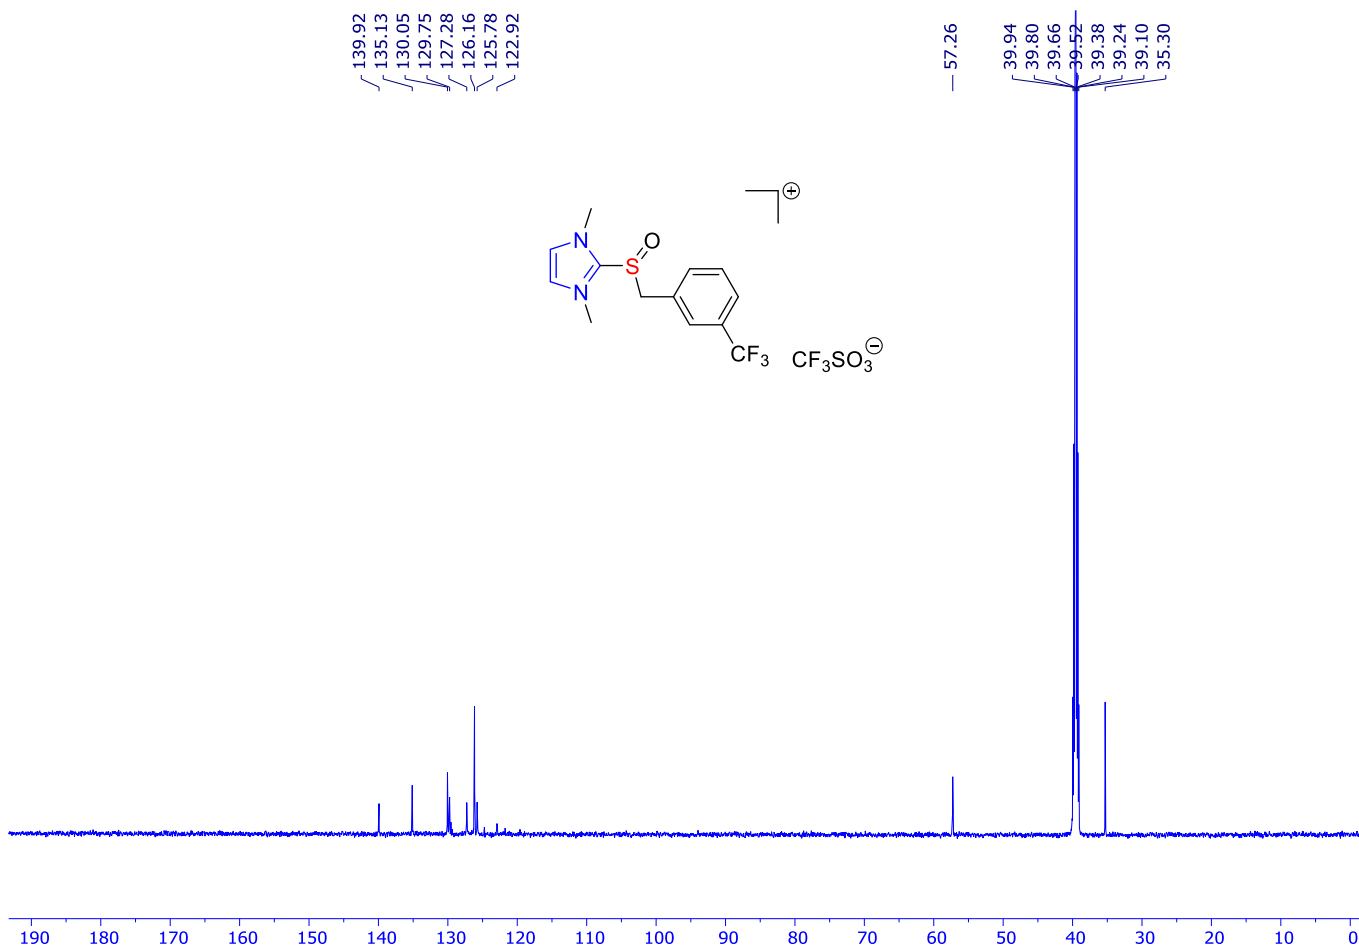

Fig. S91.  $^{13}C$  NMR spectrum of compound **7e** (DMSO- $d_6$ , 600 MHz)

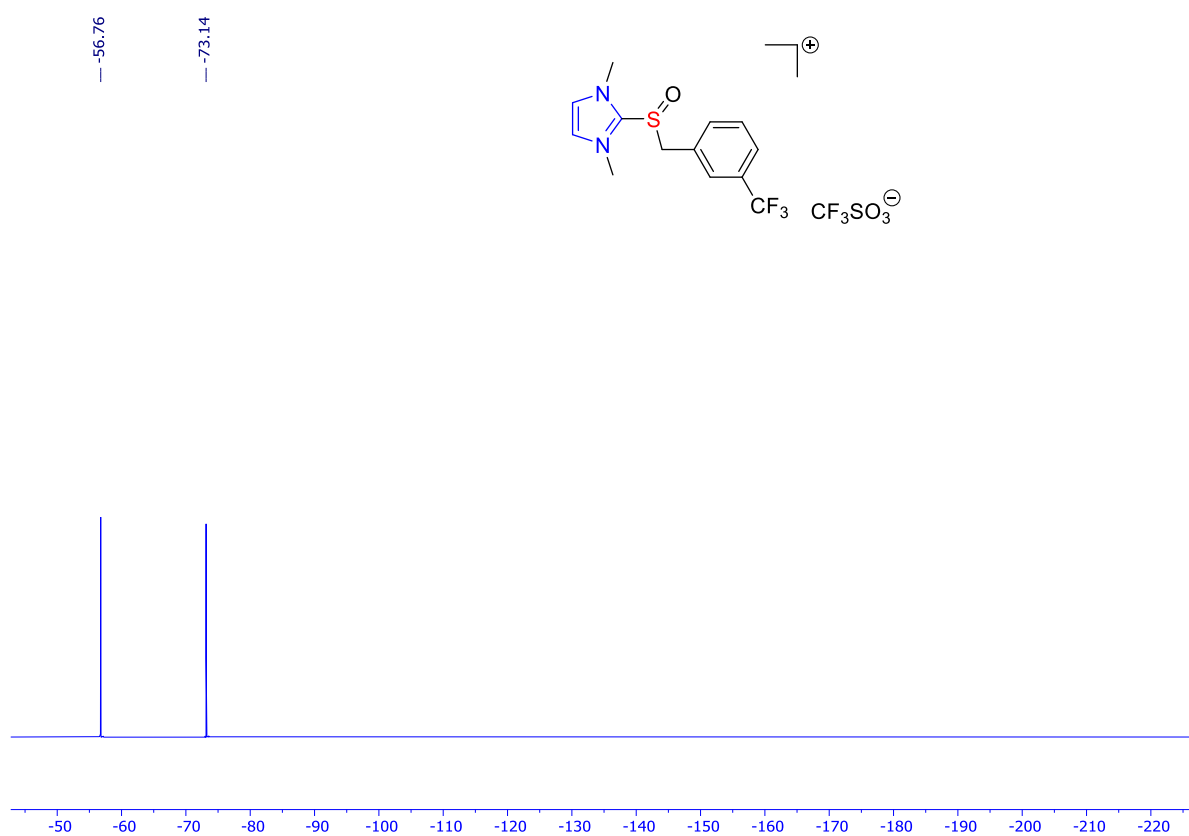

Fig. S92.  $^{19}\text{F}$  NMR spectrum of compound **7e** ( $\text{DMSO-}d_6$ , 600 MHz)

# 1,3-dimethyl-2-((4-nitrobenzyl)sulfinyl)-1H-imidazol-3-ium Triflate (8e)

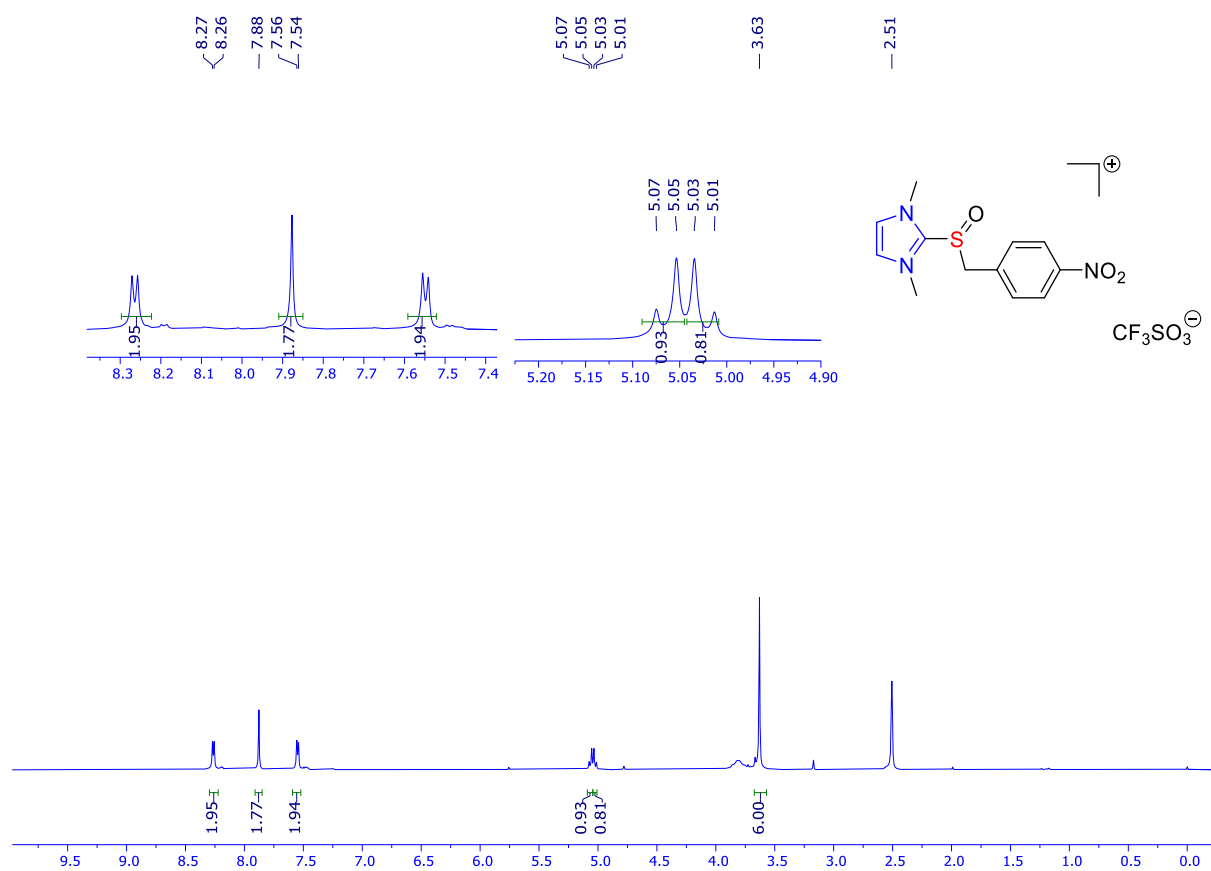

Fig. S93. <sup>1</sup>H NMR spectrum of compound **8e** (DMSO-*d*<sub>6</sub>, 600 MHz)

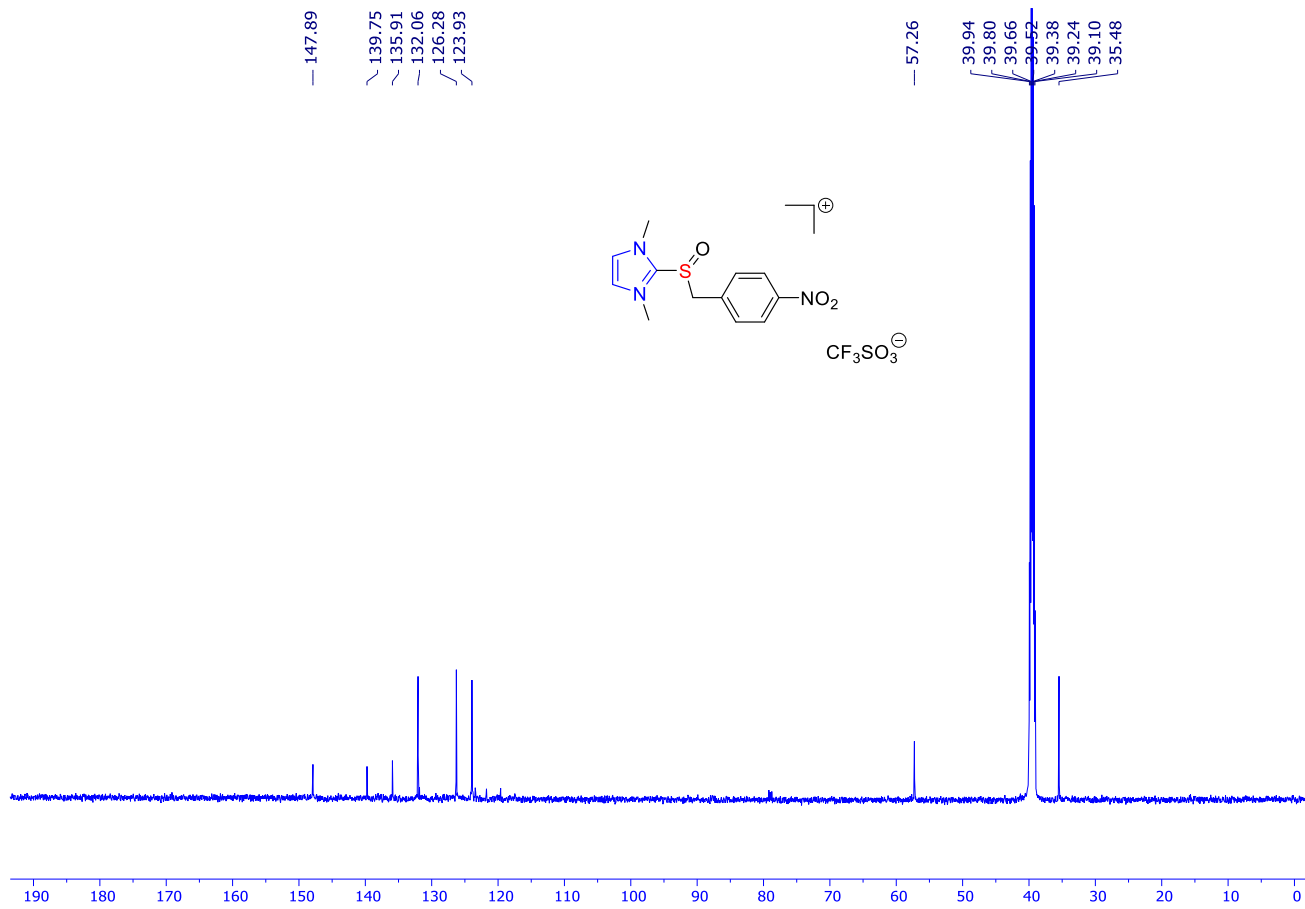

Fig. S94.  $^{13}\text{C}$  NMR spectrum of compound **8e** ( $\text{DMSO-}d_6$ , 600 MHz)

**1,3-dimethyl-2-((2-chloro-4-fluorobenzyl)sulfonyl)-1H-imidazol-3-iumTriflate (1f)**

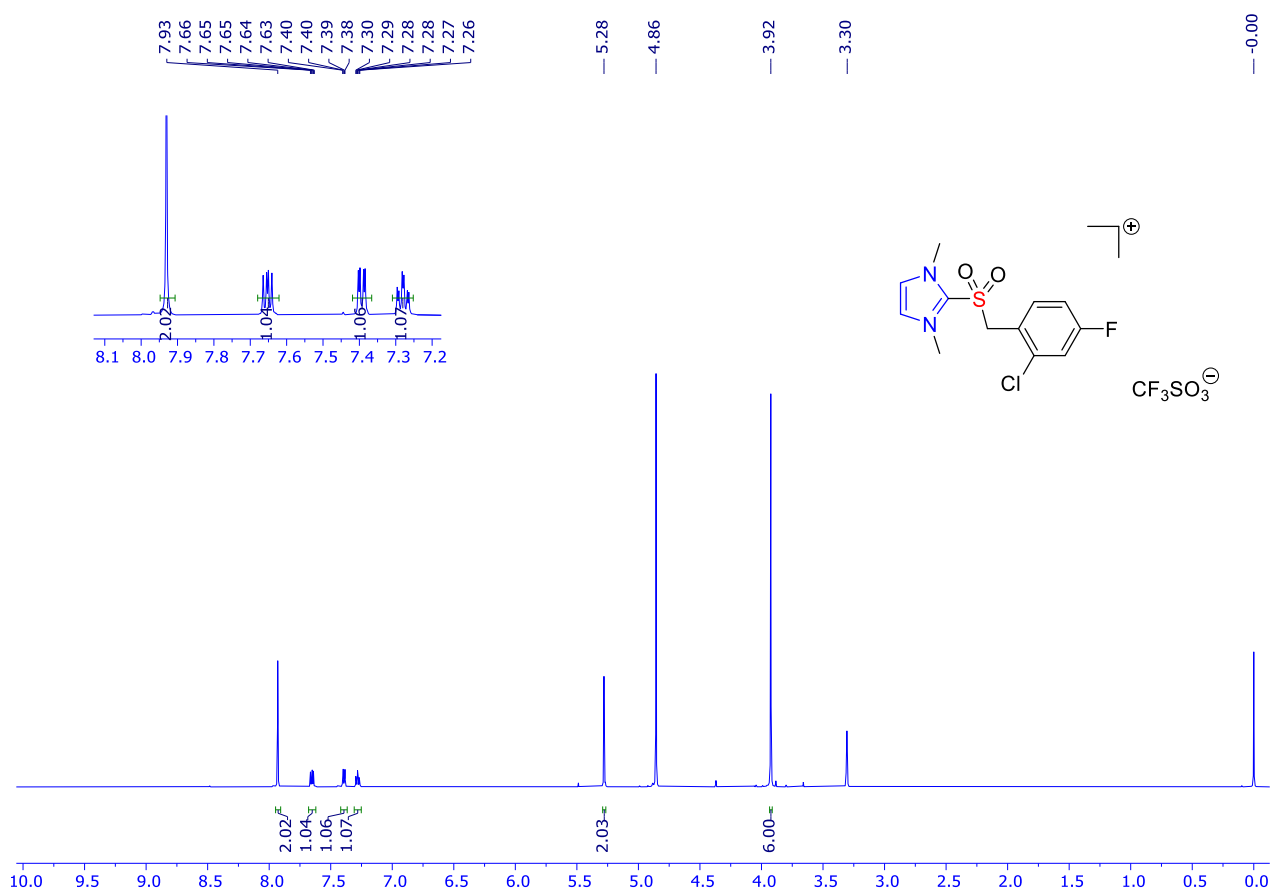

Fig. S95. <sup>1</sup>H NMR spectrum of compound **1f** (CD<sub>3</sub>OD, 600 MHz)

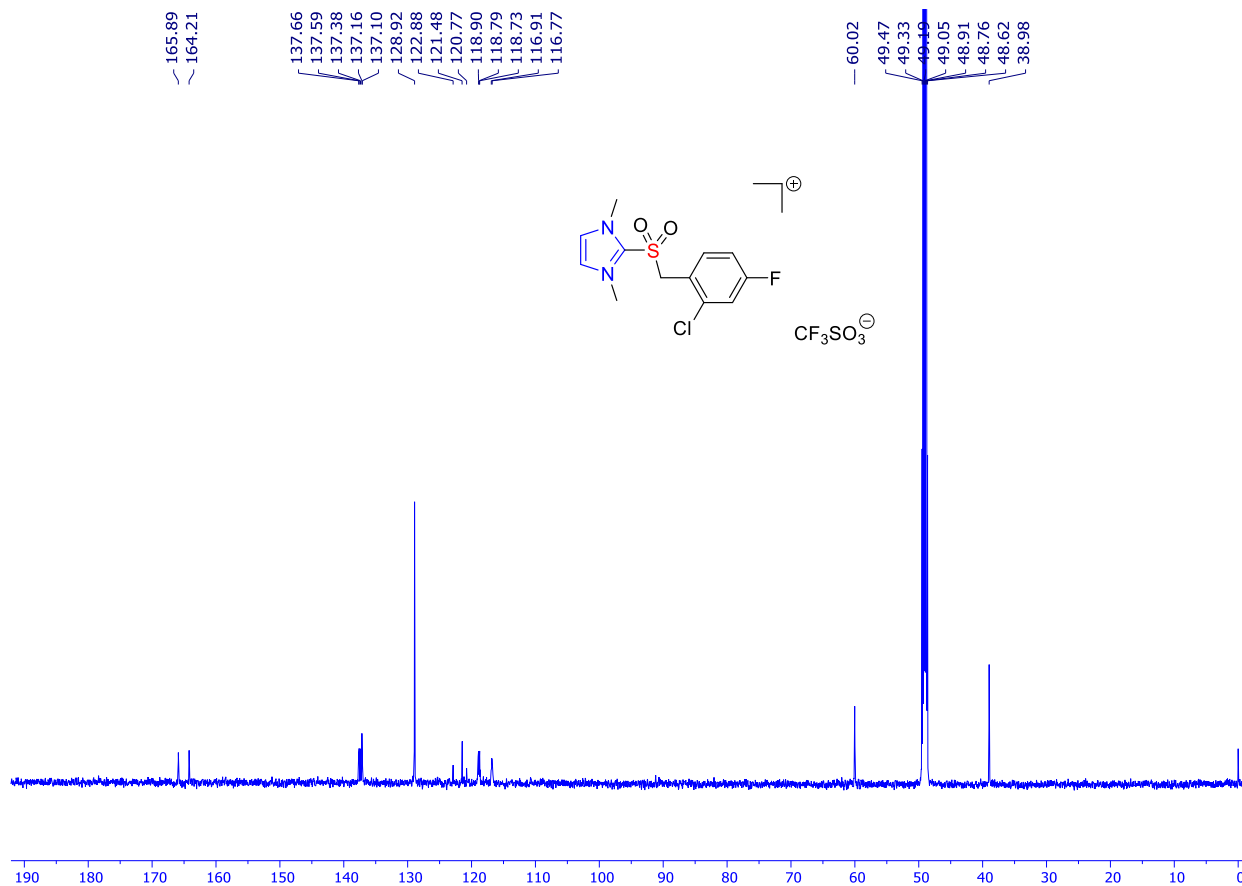

Fig. S96.  $^{13}\text{C}$  NMR spectrum of compound **1f** ( $\text{CD}_3\text{OD}$ , 600 MHz)

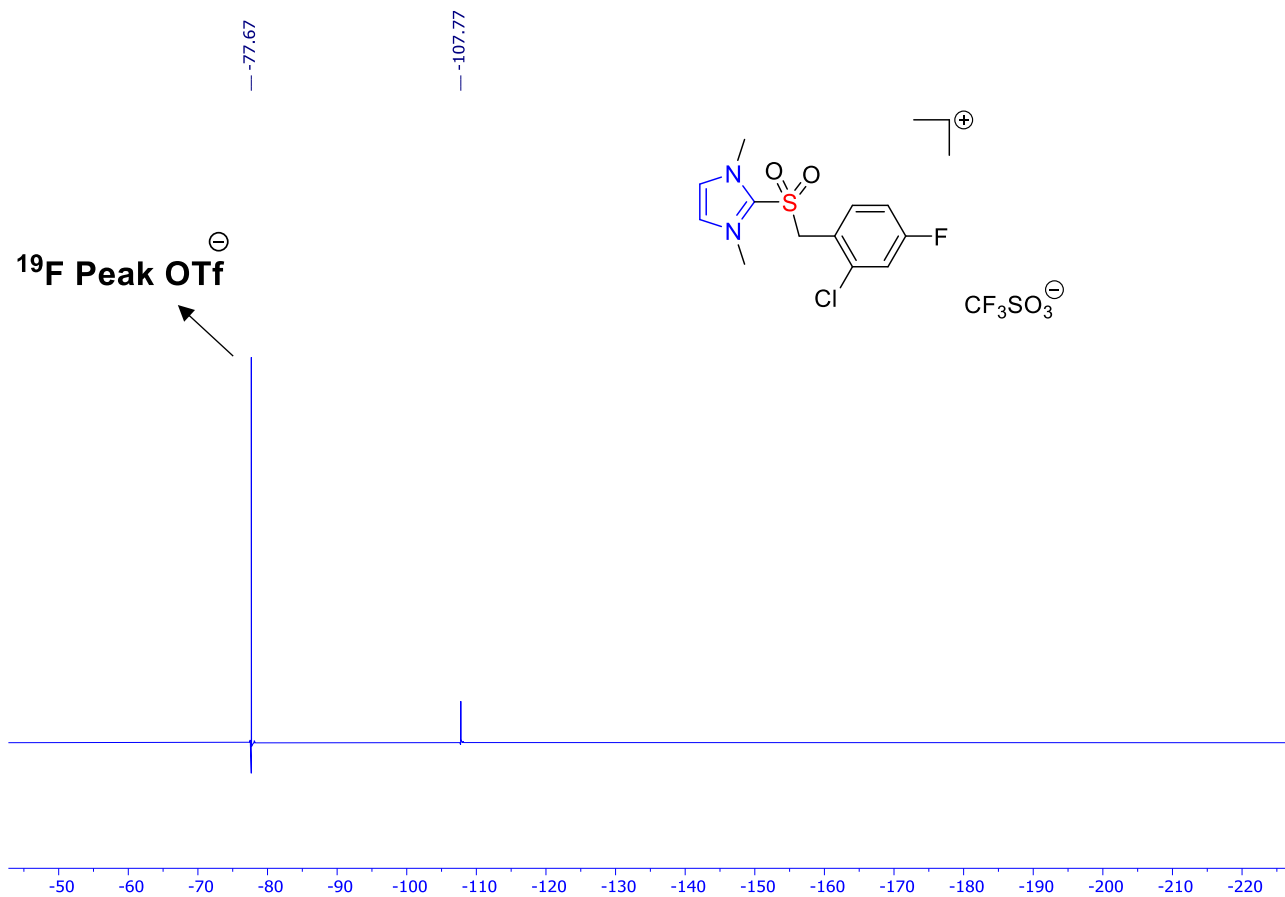

Fig. S97.  $^{19}\text{F}$  NMR spectrum of compound **1f** ( $\text{CD}_3\text{OD}$ , 600 MHz)



# 1,3-dimethyl-2-(benzylsulfonyl)-1H-imidazol-3-ium Triflate (2f)

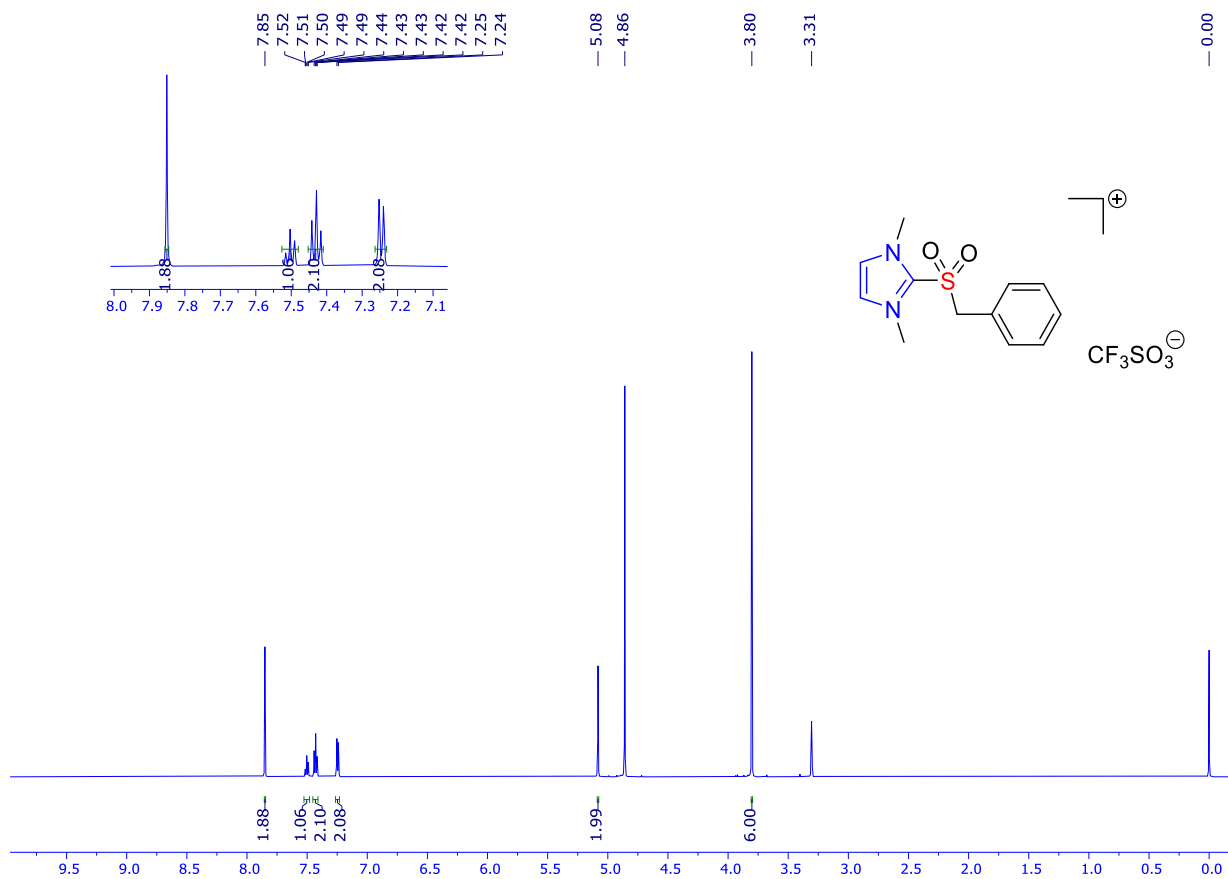

Fig. S98. <sup>1</sup>H NMR spectrum of compound **2f** (CD<sub>3</sub>OD, 600 MHz)

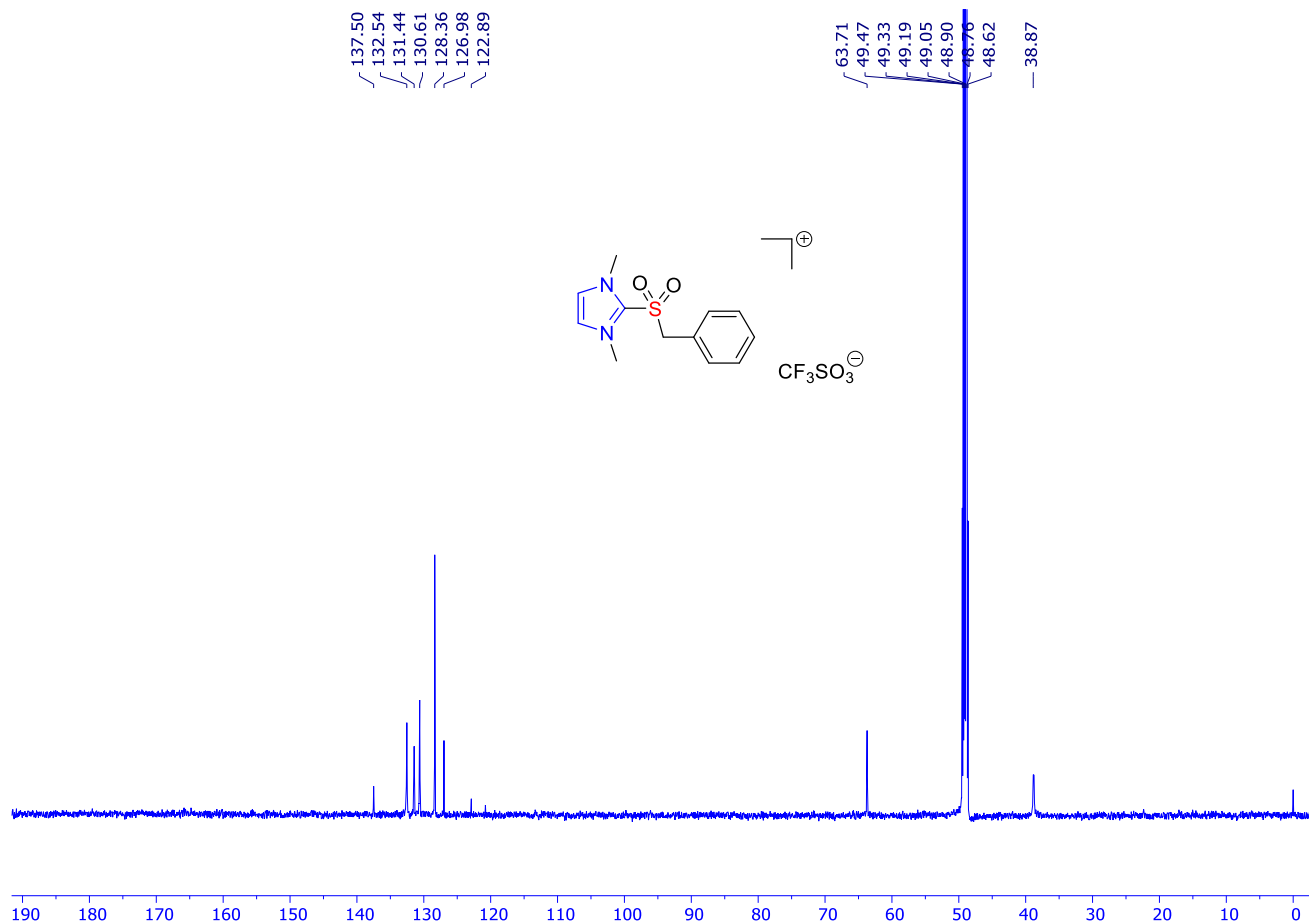

Fig. S99.  $^{13}\text{C}$  NMR spectrum of compound **2f** ( $\text{CD}_3\text{OD}$ , 600 MHz)

# 1,3-dimethyl-2-((4-bromobenzyl)sulfonyl)-1H-imidazol-3-ium Triflate (3f)

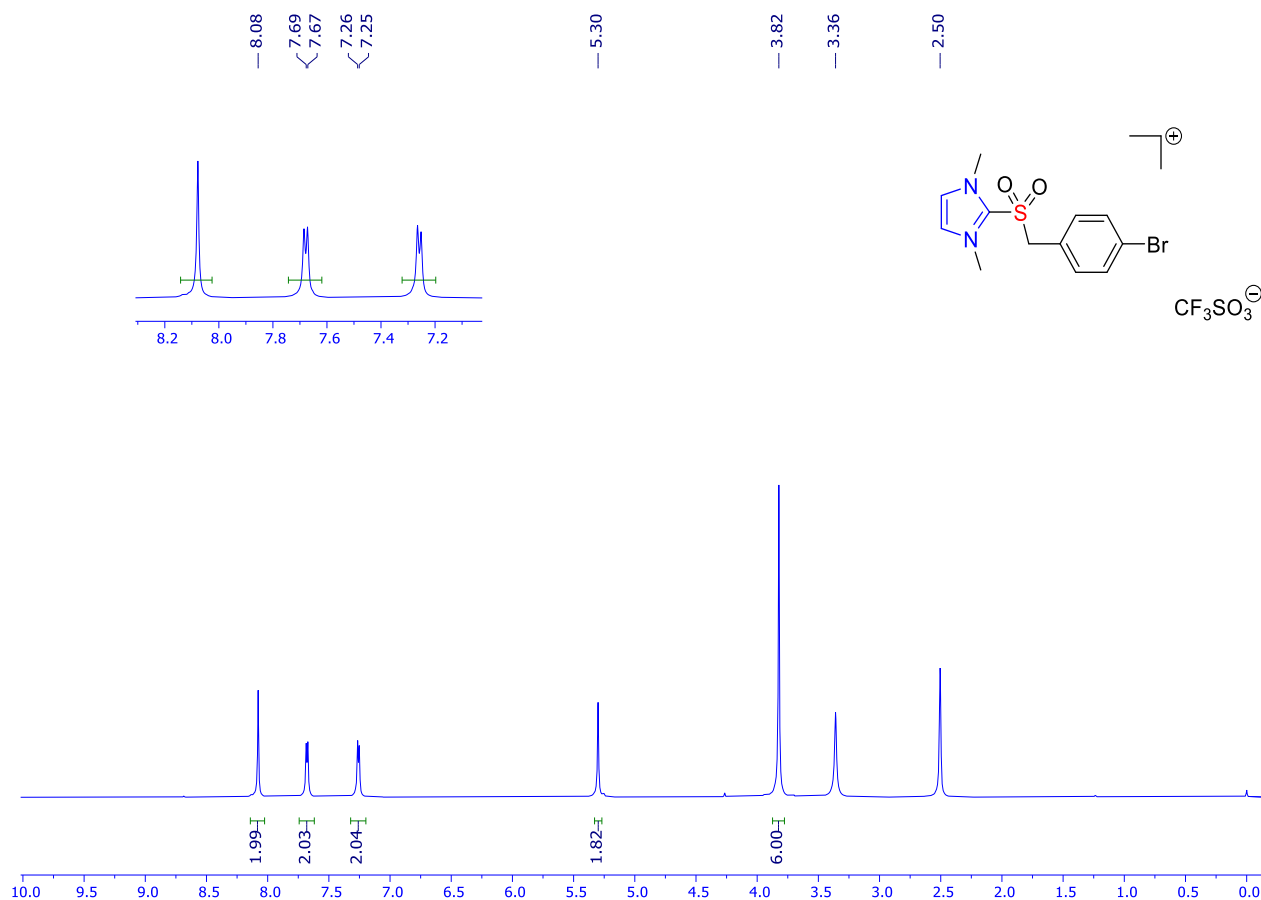

Fig. S100.  $^1\text{H}$  NMR spectrum of compound **3f** ( $\text{DMSO-}d_6$ , 600 MHz)

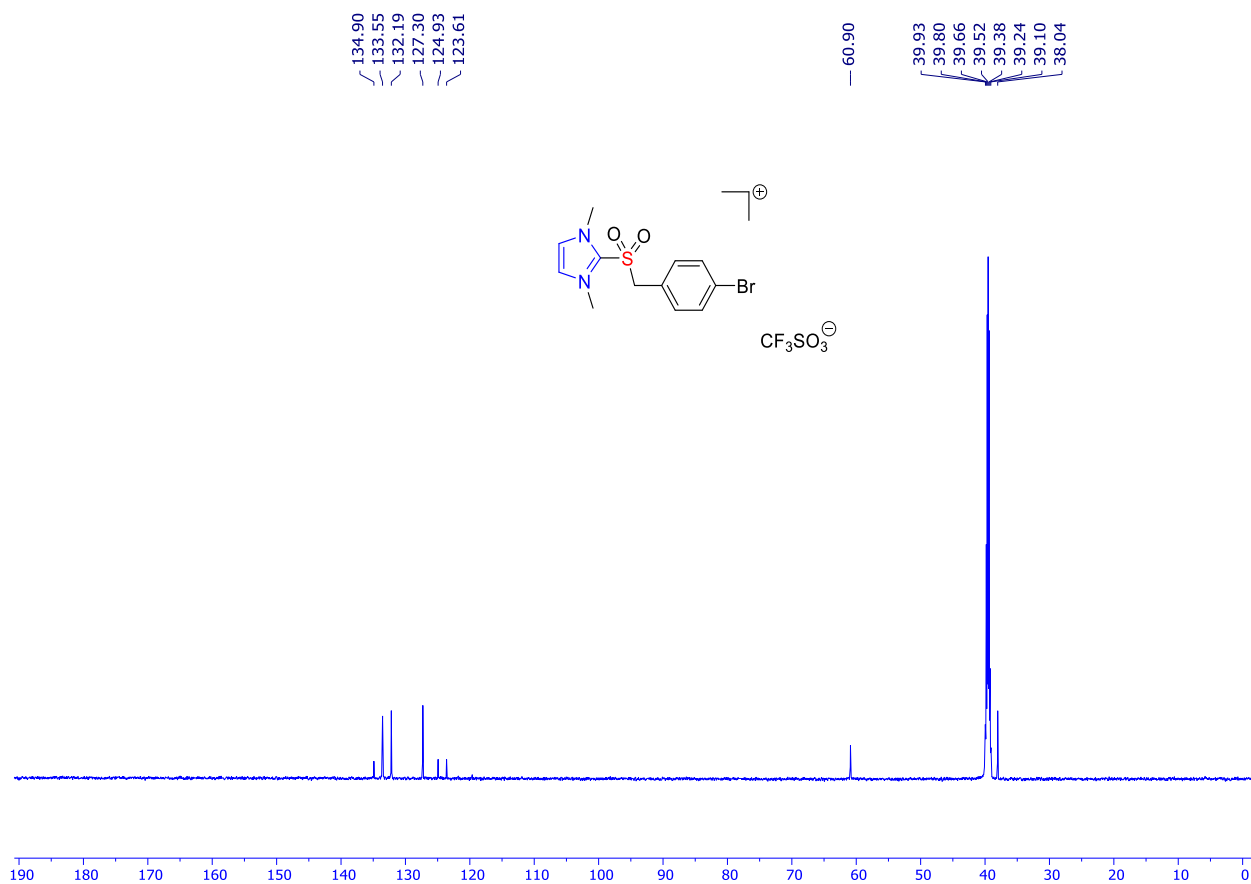

Fig. S101. <sup>13</sup>C NMR spectrum of compound **3f** (DMSO-*d*<sub>6</sub>, 600 MHz)

**1,3-dimethyl-2-((2-fluoro-4-bromobenzyl)sulfonyl)-1H-imidazol-3-ium Triflate (4f)**

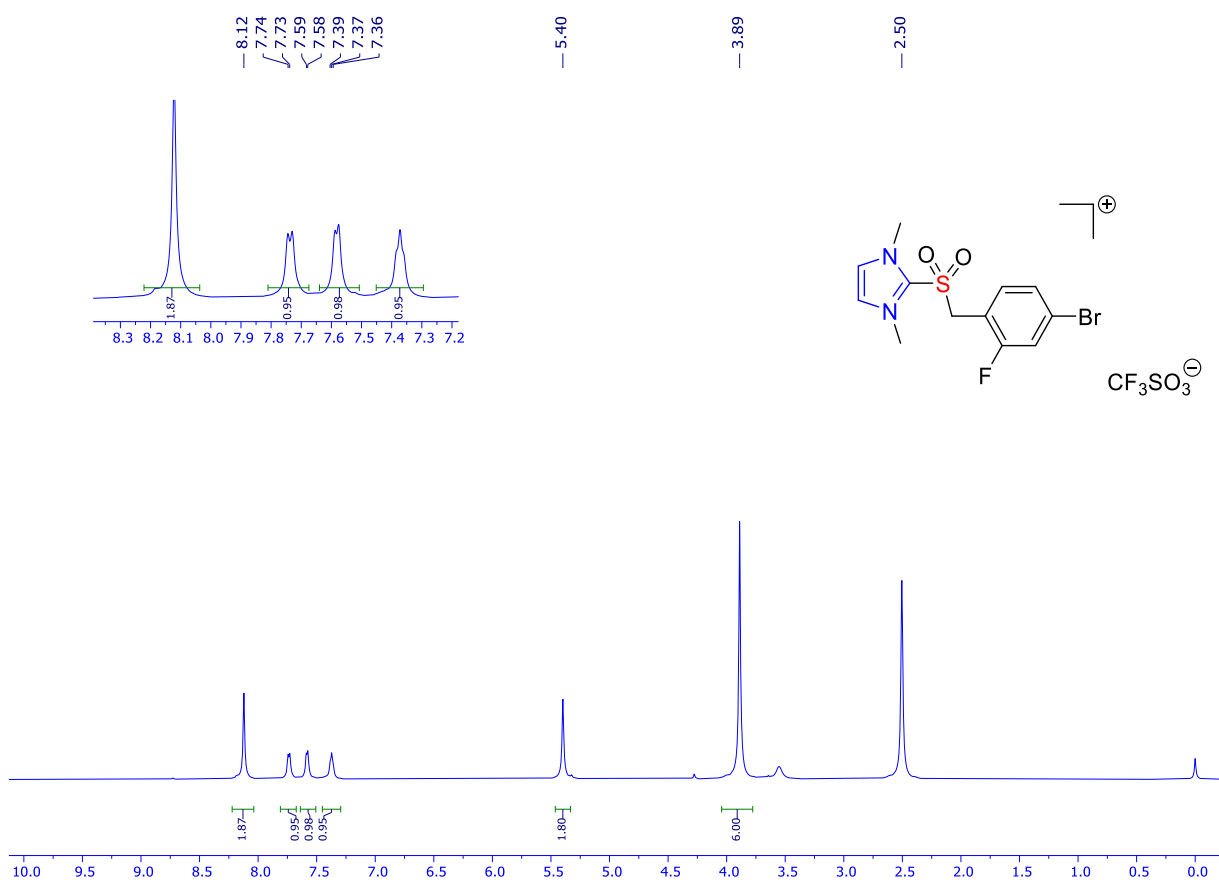

Fig. S102. <sup>1</sup>H NMR spectrum of compound **4f** (DMSO-*d*<sub>6</sub>, 600 MHz)

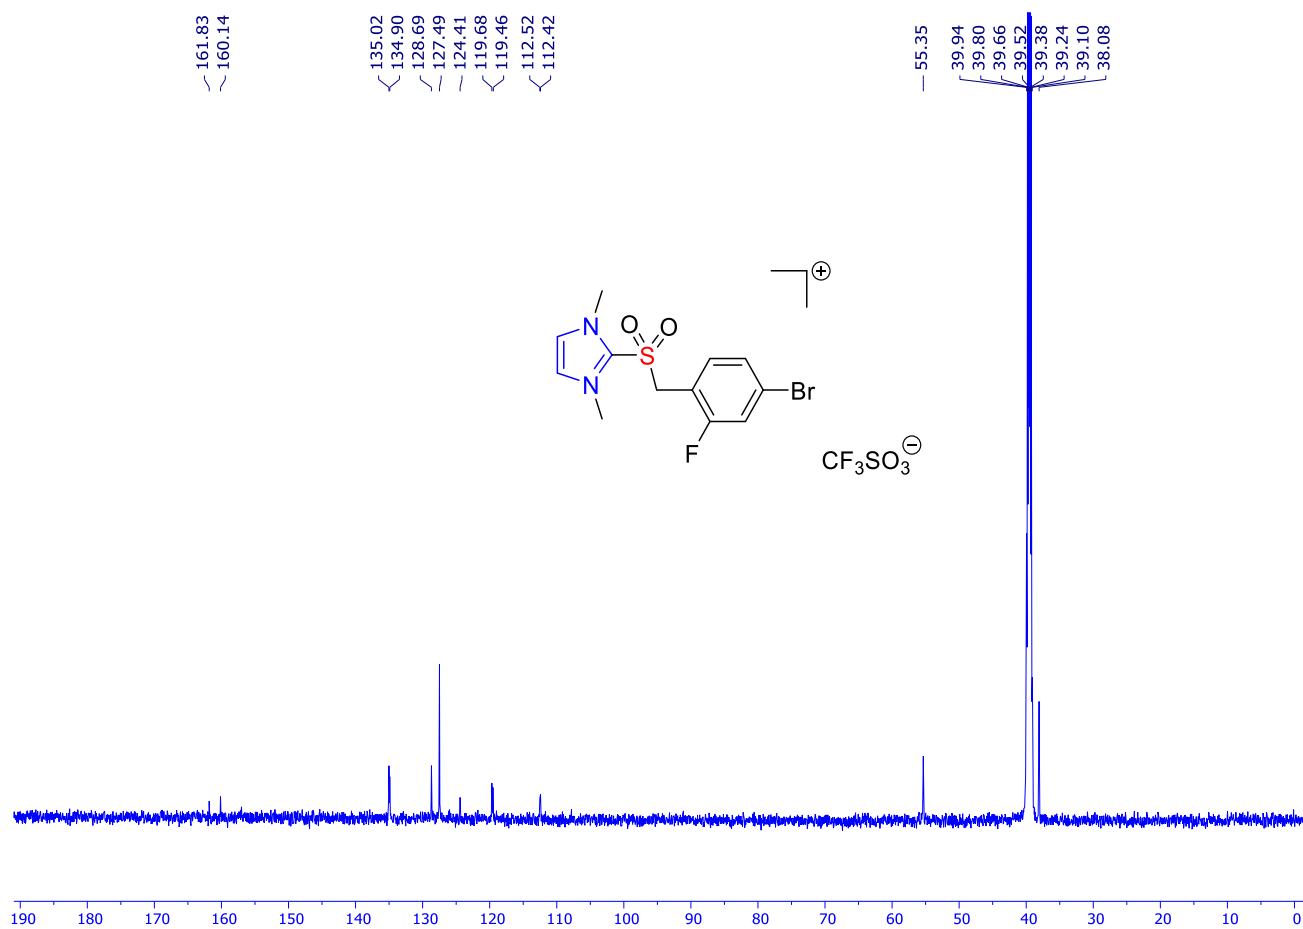

Fig. S103. <sup>13</sup>C NMR spectrum of compound **4f** (DMSO-*d*<sub>6</sub>, 600 MHz)

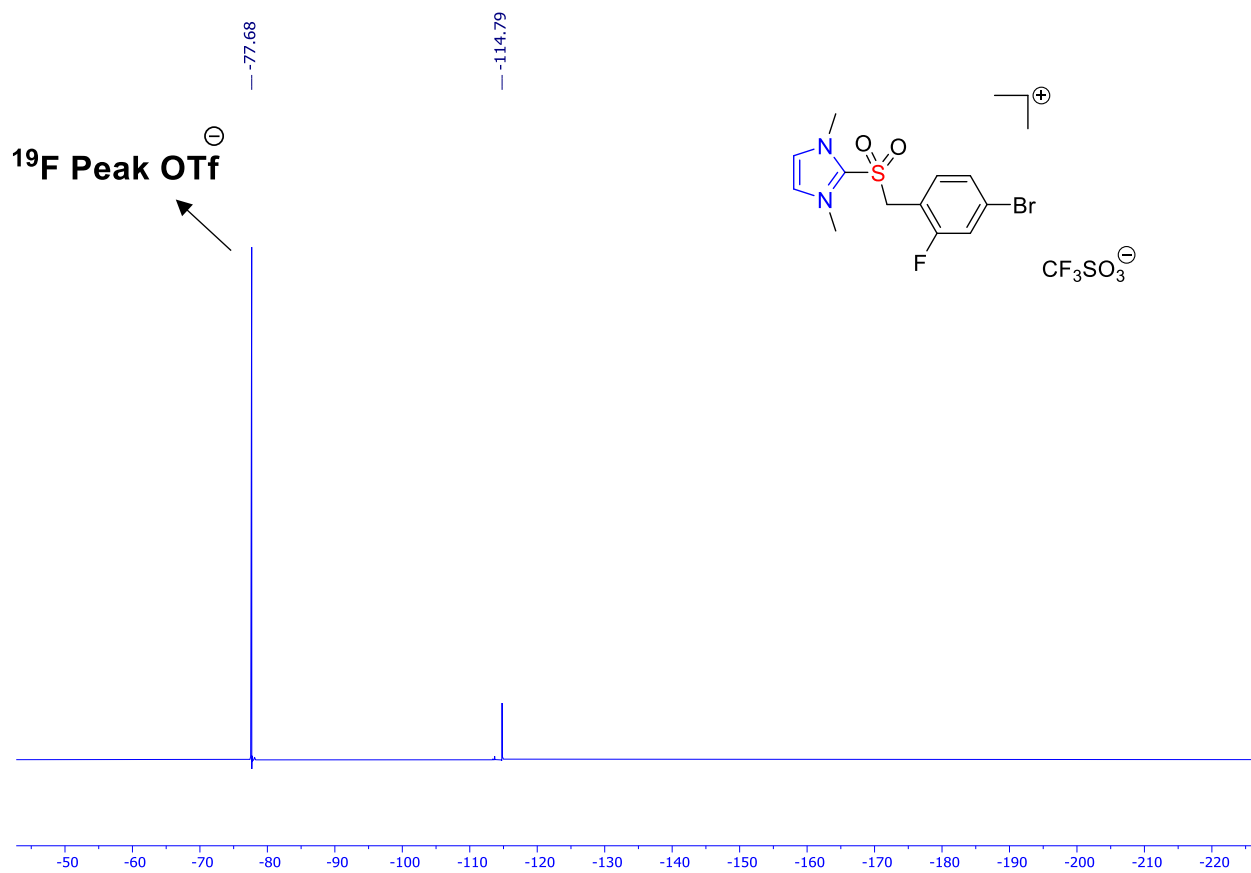

Fig. S104.  $^{19}\text{F}$  NMR spectrum of compound **4f** ( $\text{DMSO}-d_6$ , 600 MHz)

**1,3-dimethyl-2-((4-(trifluoromethoxy)benzyl)sulfonyl)-1H-imidazol-3-ium Triflate (5f)**

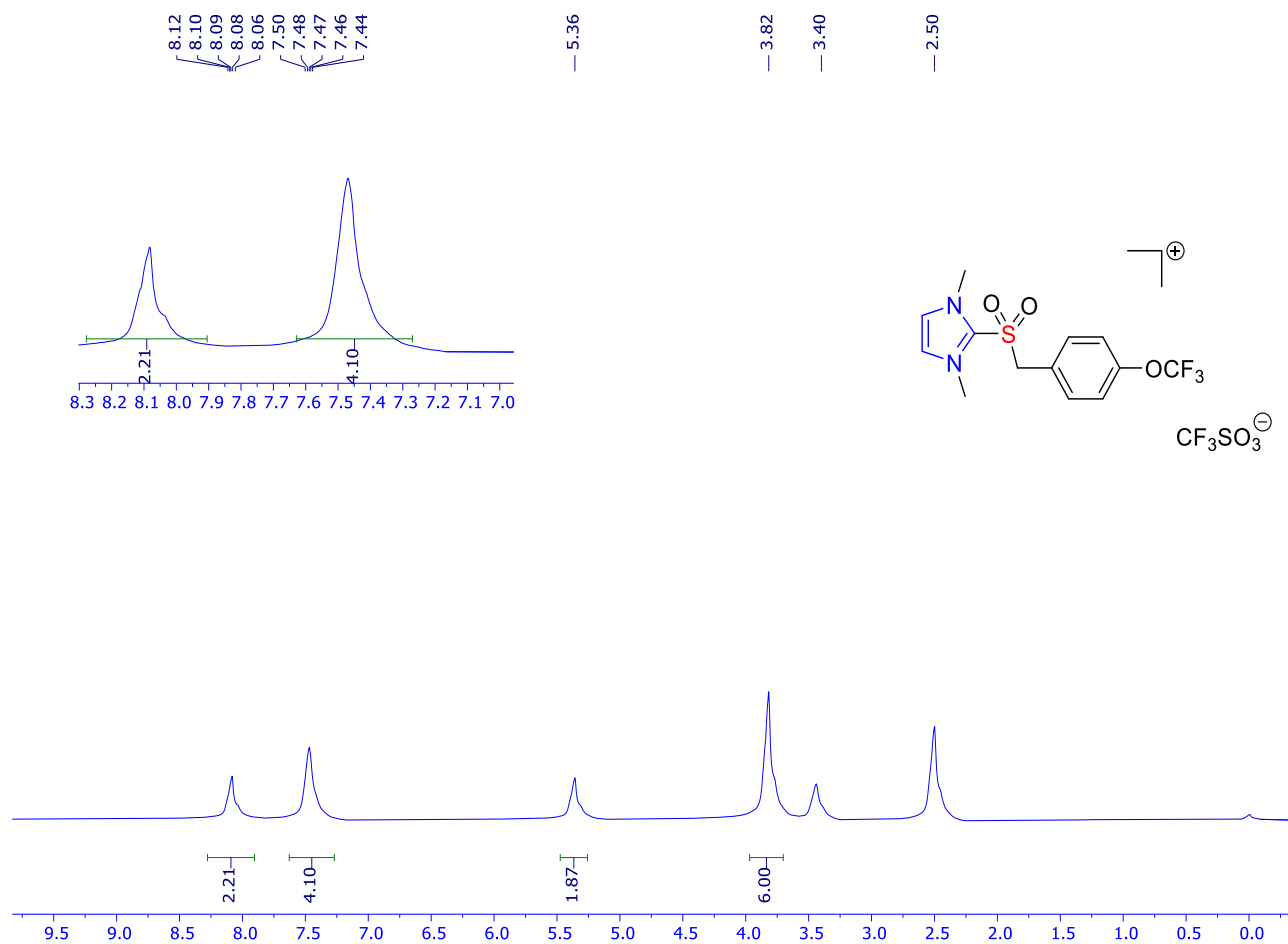

Fig. S105.  $^1\text{H}$  NMR spectrum of compound **5f** ( $\text{DMSO-}d_6$ , 600 MHz)



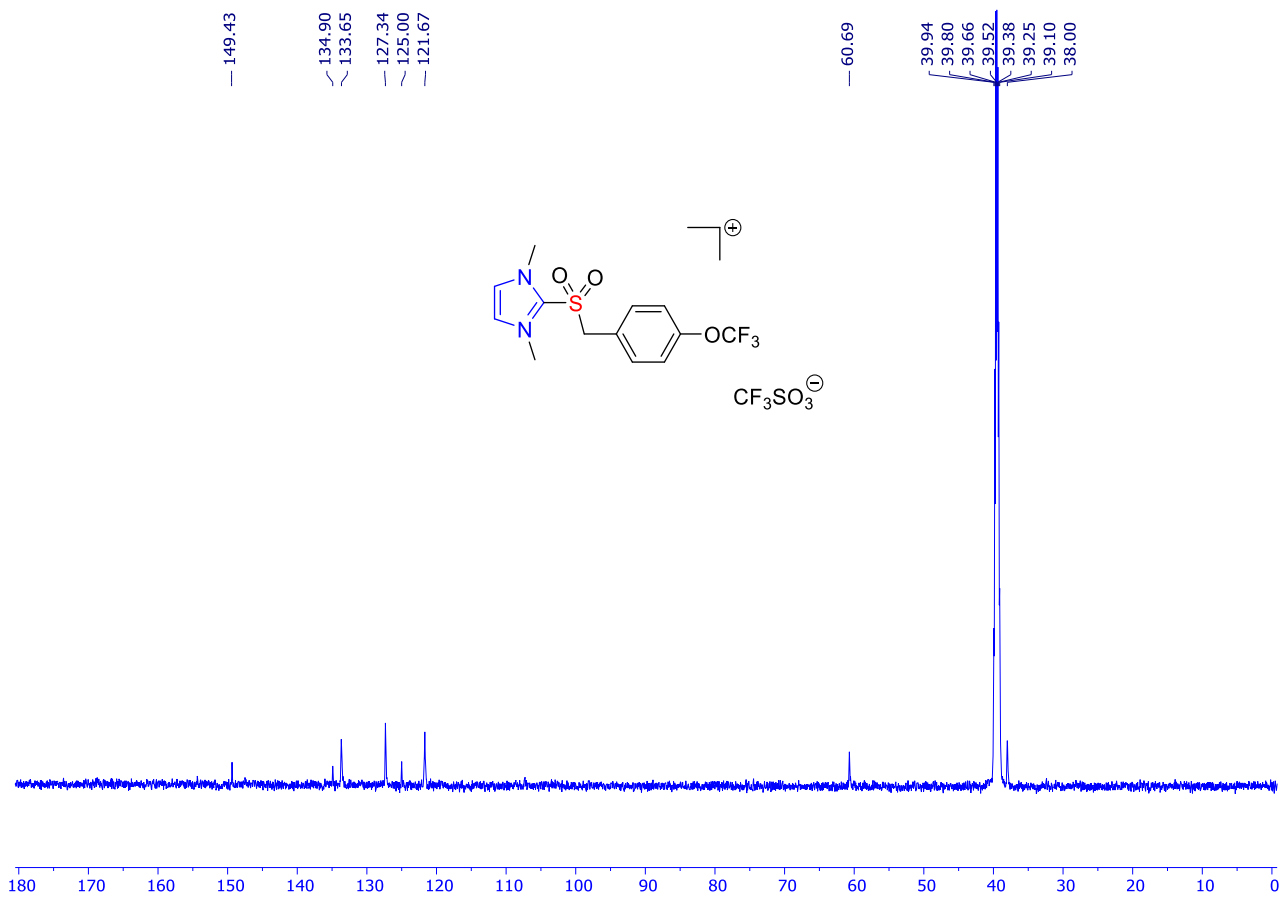

Fig. S106.  $^{13}\text{C}$  NMR spectrum of compound **5f** (DMSO- $d_6$ , 600 MHz)

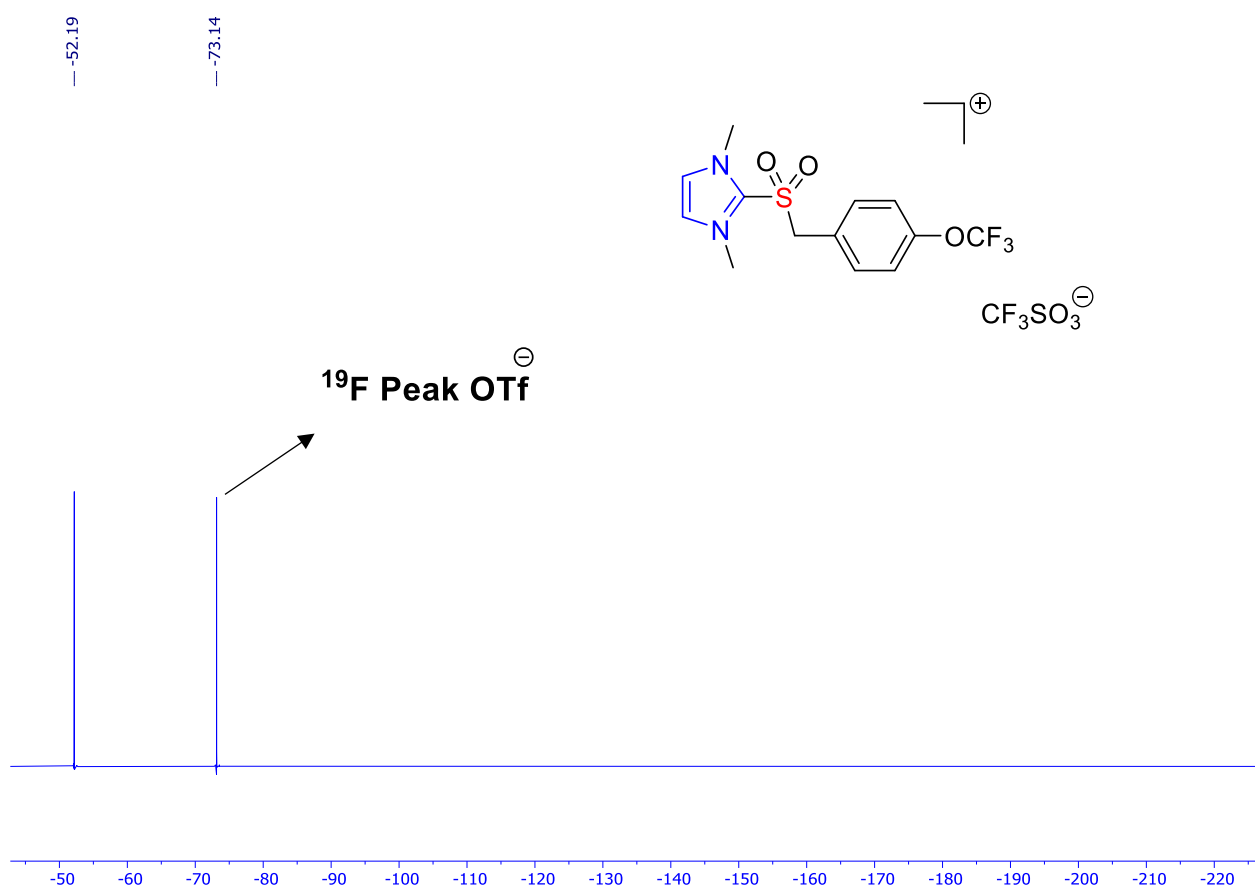

Fig. S107.  $^{19}\text{F}$  NMR spectrum of compound **5f** ( $\text{DMSO}-d_6$ , 600 MHz)

**1,3-dimethyl-2-((4-(tert-butyl)benzyl)sulfonyl)-1H-imidazol-3-ium Triflate (6f)**

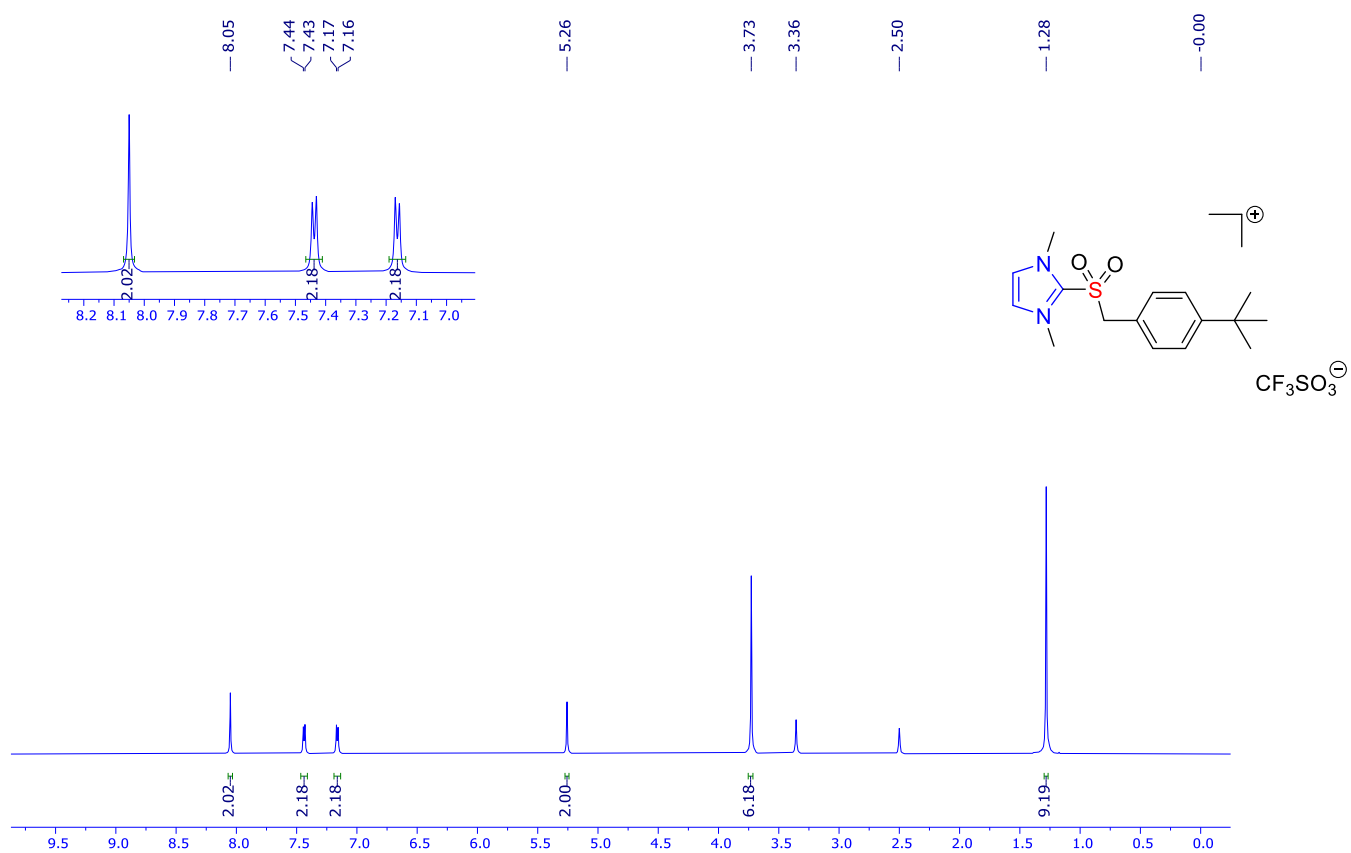

Fig. S108. <sup>1</sup>H NMR spectrum of compound **6f** (DMSO-*d*<sub>6</sub>, 600 MHz)

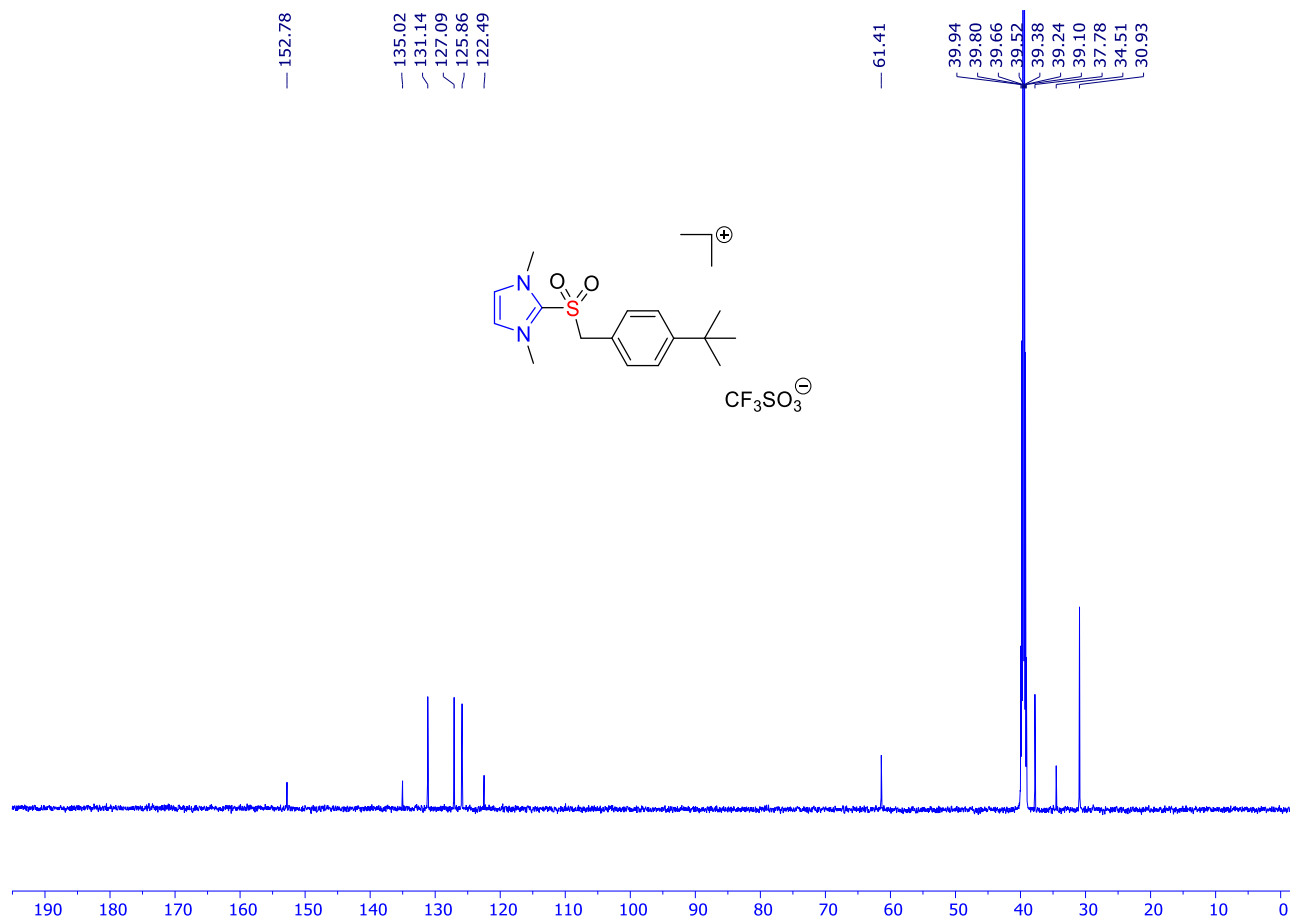

Fig. S109. <sup>13</sup>C NMR spectrum of compound **6f** (DMSO-*d*<sub>6</sub>, 600 MHz)

**1,3-dimethyl-2-((3-(trifluoromethyl)benzyl)sulfonyl)-1H-imidazol-3-ium Triflate (7f)**

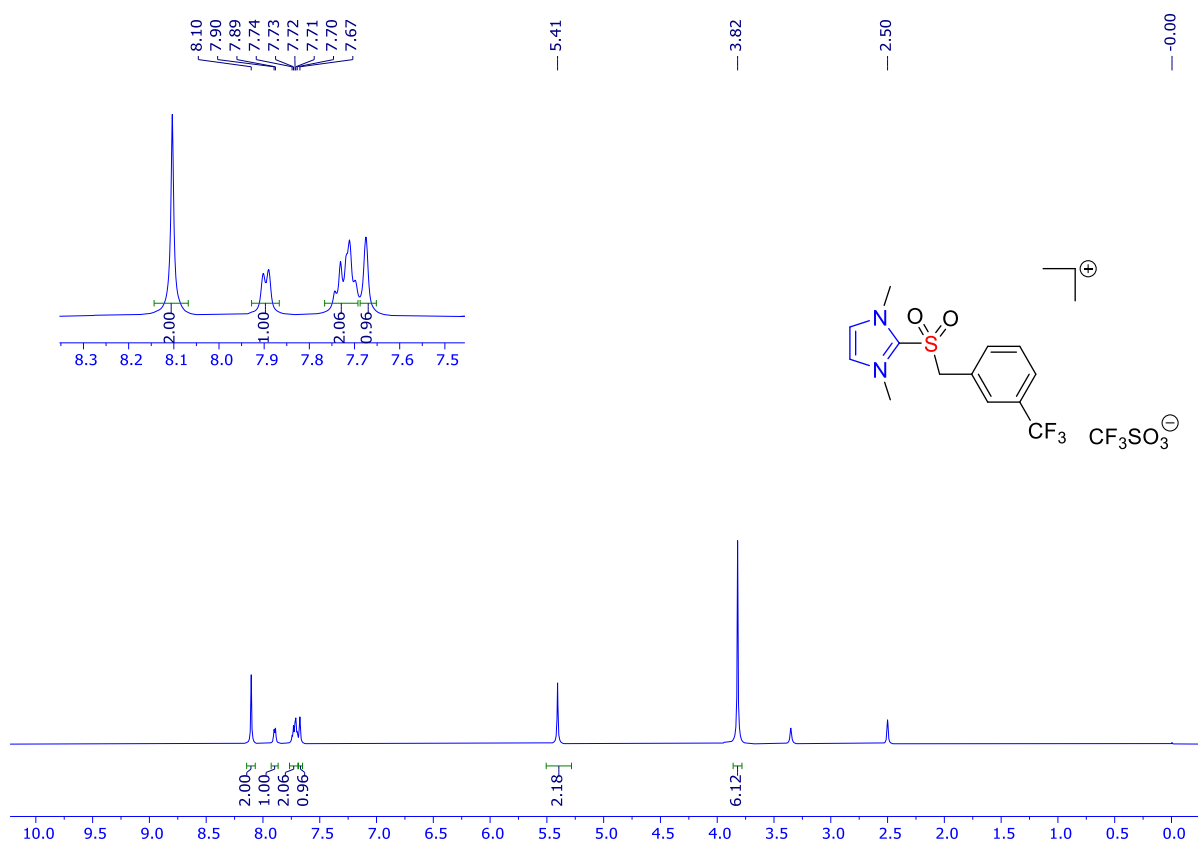

Fig. S110.  $^1\text{H}$  NMR spectrum of compound **7f** ( $\text{DMSO-}d_6$ , 600 MHz)

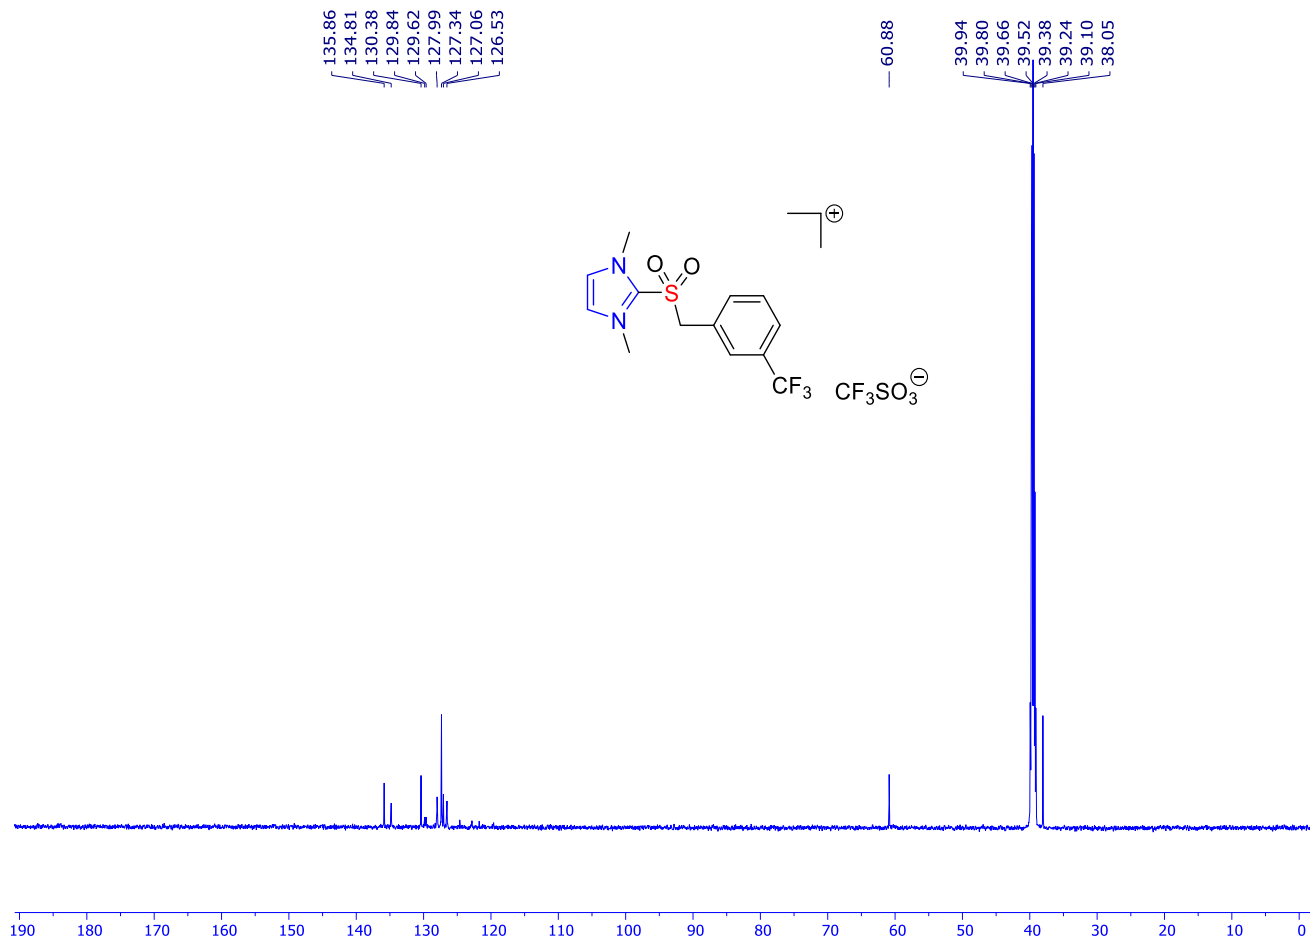

Fig. S111.  $^{13}\text{C}$  NMR spectrum of compound **7f** ( $\text{DMSO-}d_6$ , 600 MHz)

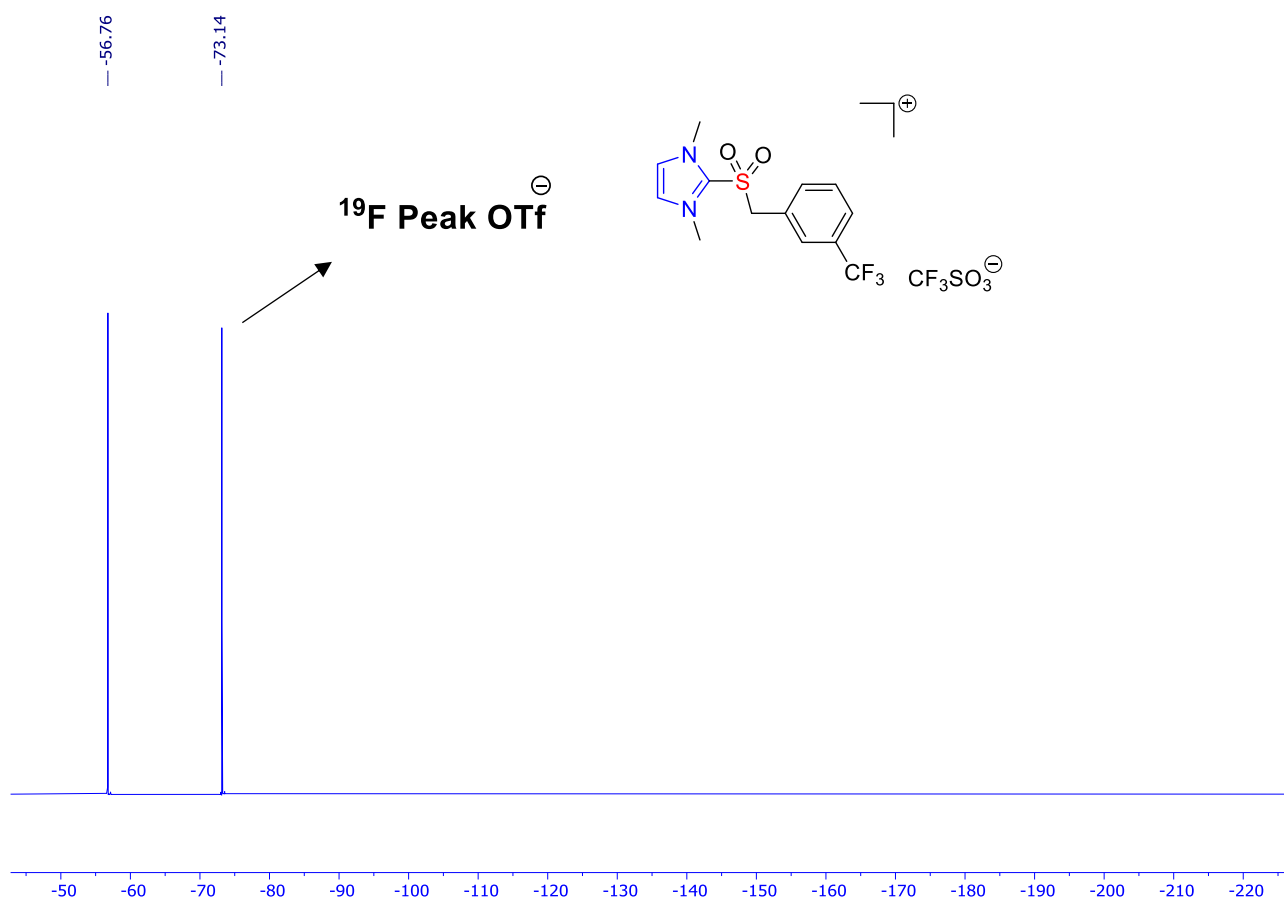

Fig. S112.  $^{19}\text{F}$  NMR spectrum of compound **7f** ( $\text{DMSO-}d_6$ , 600 MHz)

**1,3-dimethyl-2-((4-nitrobenzyl)sulfonyl)-1H-imidazol-3-ium Triflate (8f)**

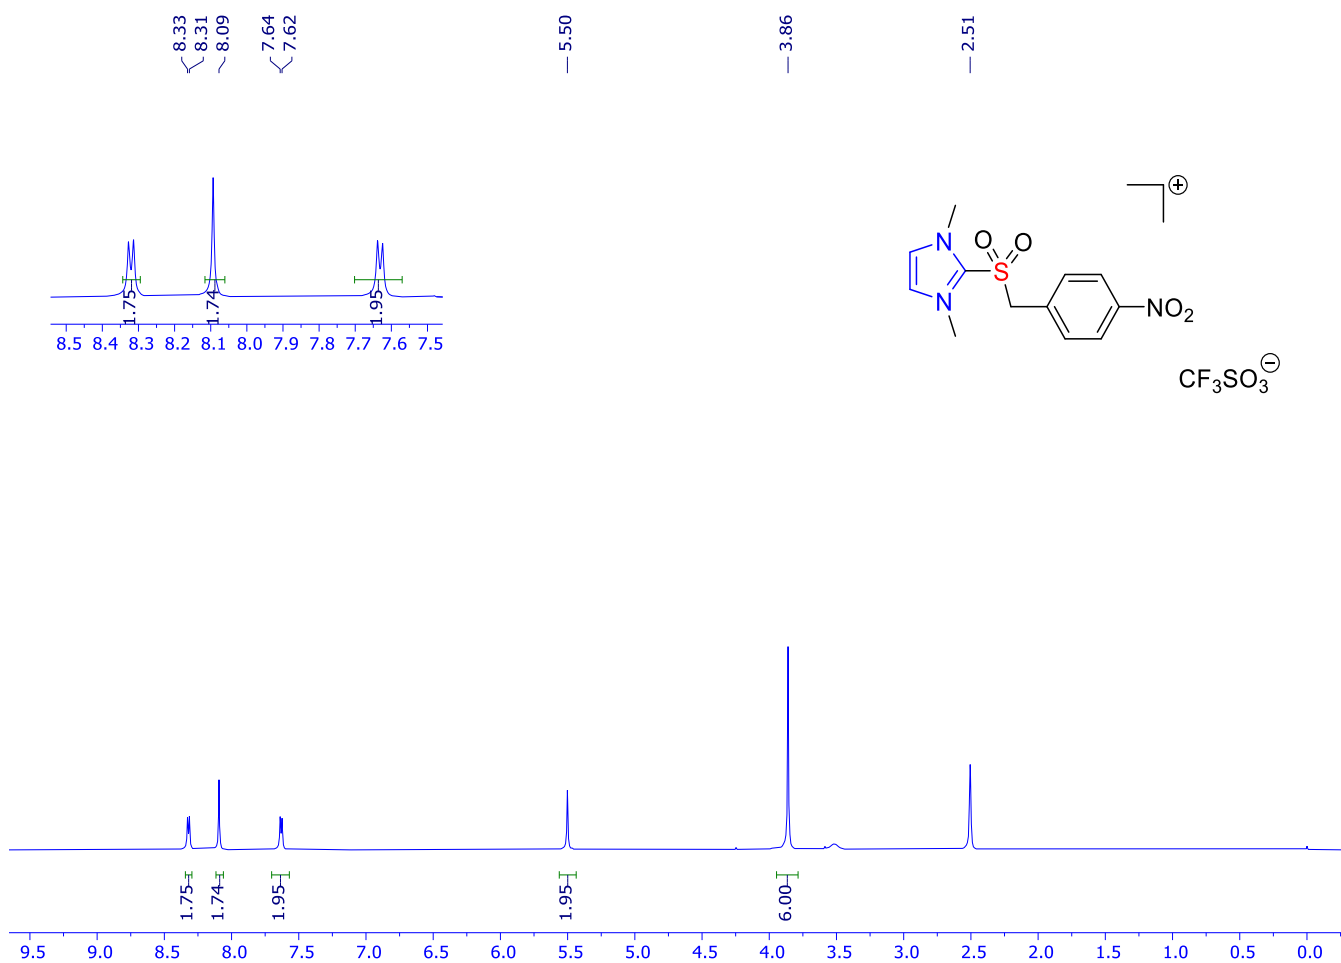

Fig. S113. <sup>1</sup>H NMR spectrum of compound **8f** (DMSO-*d*<sub>6</sub>, 600 MHz)



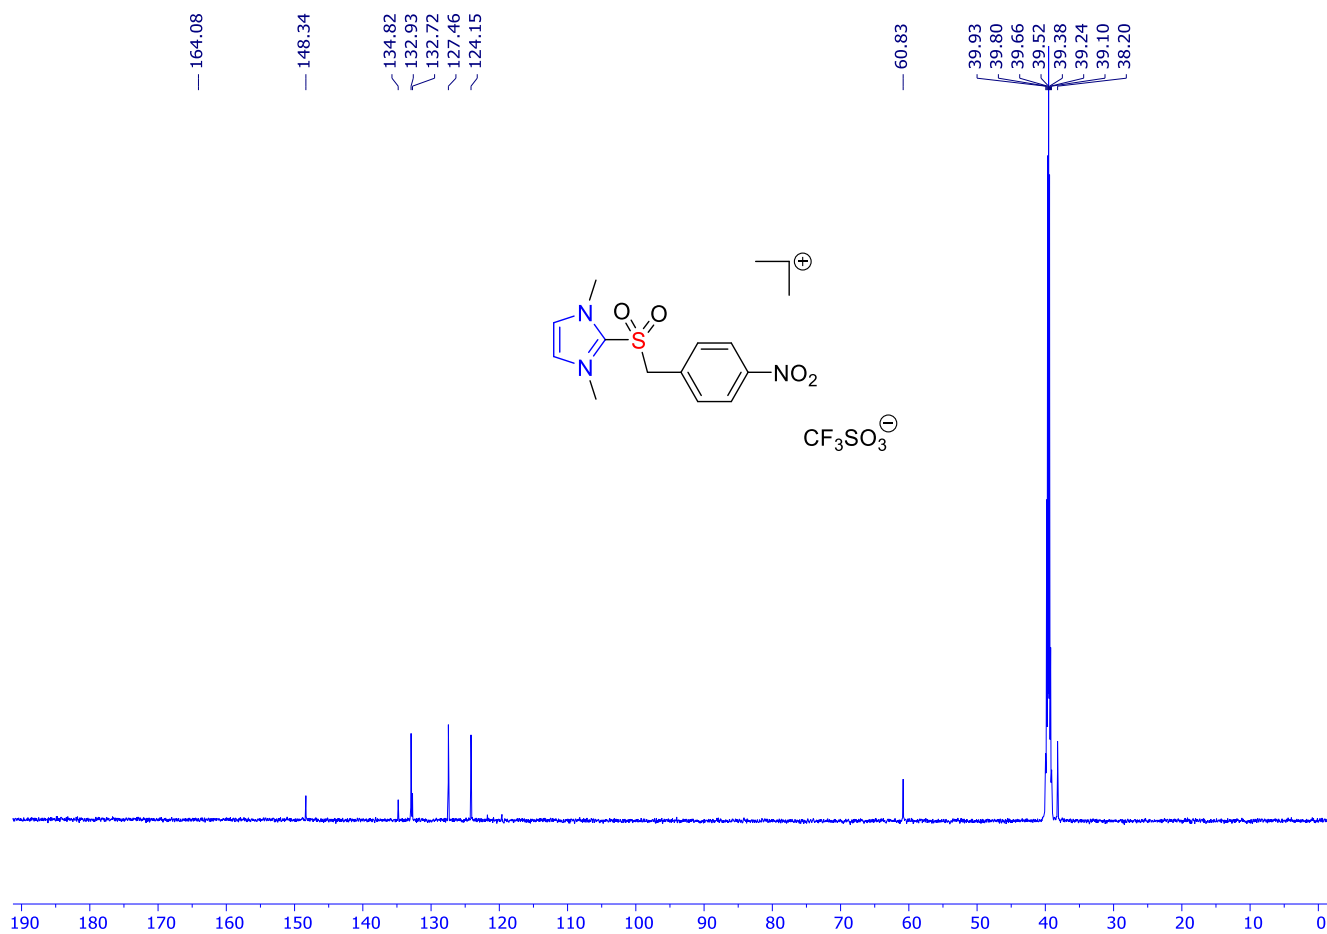

Fig. S114. <sup>13</sup>C NMR spectrum of compound **8f** (DMSO-*d*<sub>6</sub>, 600 MHz)

# IR Data-

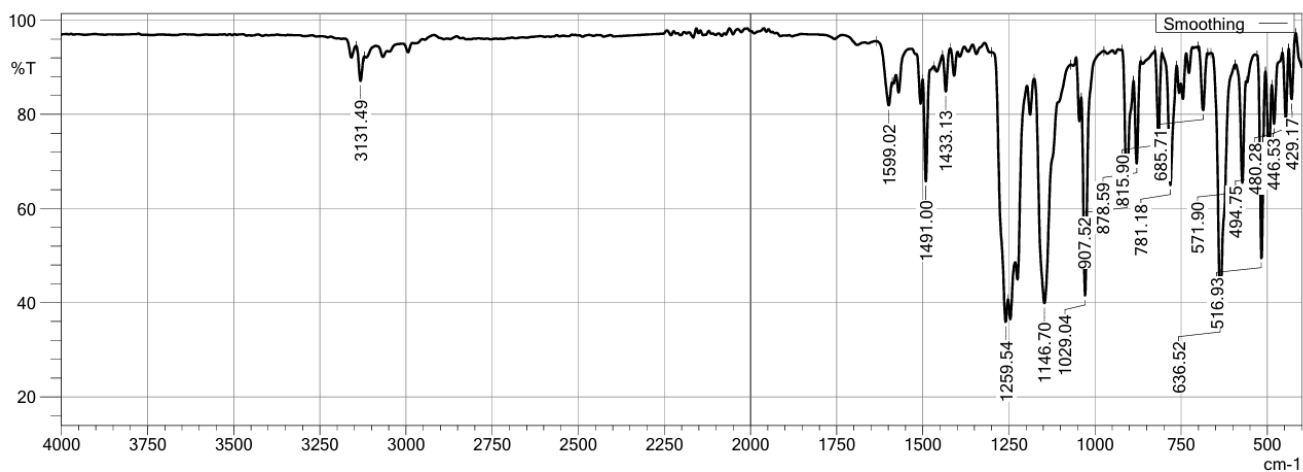

Fig. S115. IR data of compound 1d

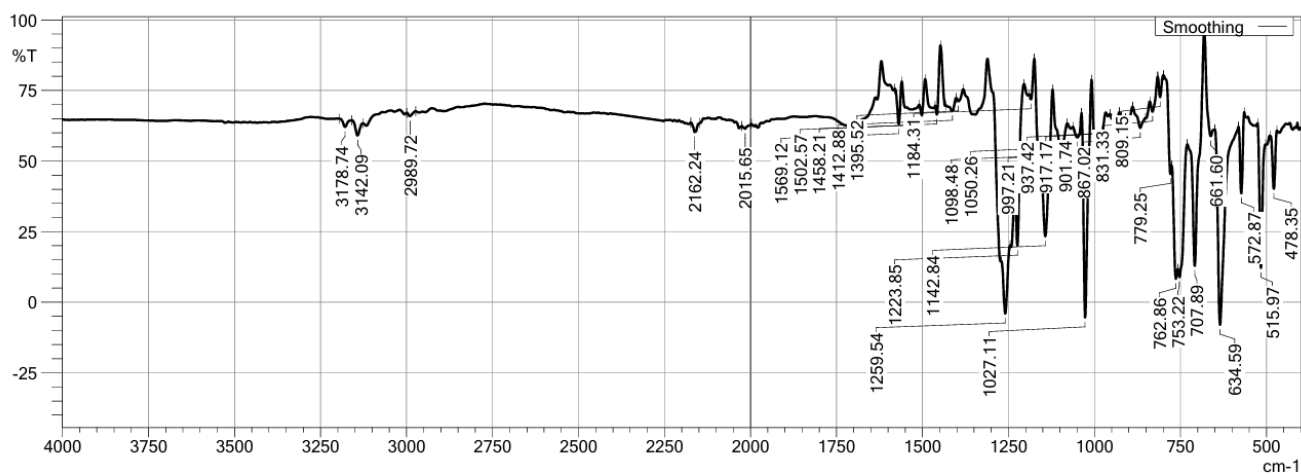

Fig. S116. IR data of compound 2d

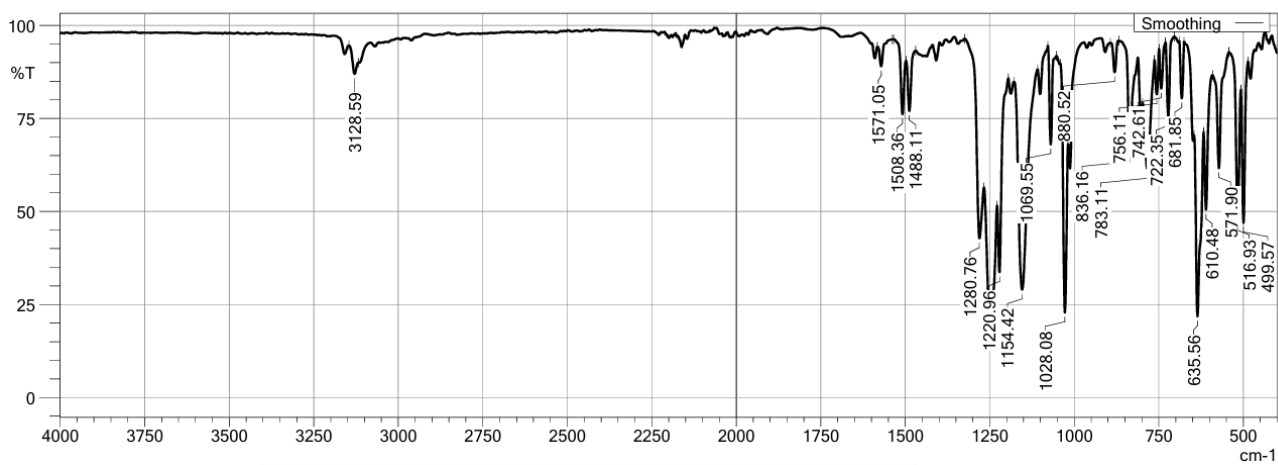

Fig. S117. IR data of compound 3d

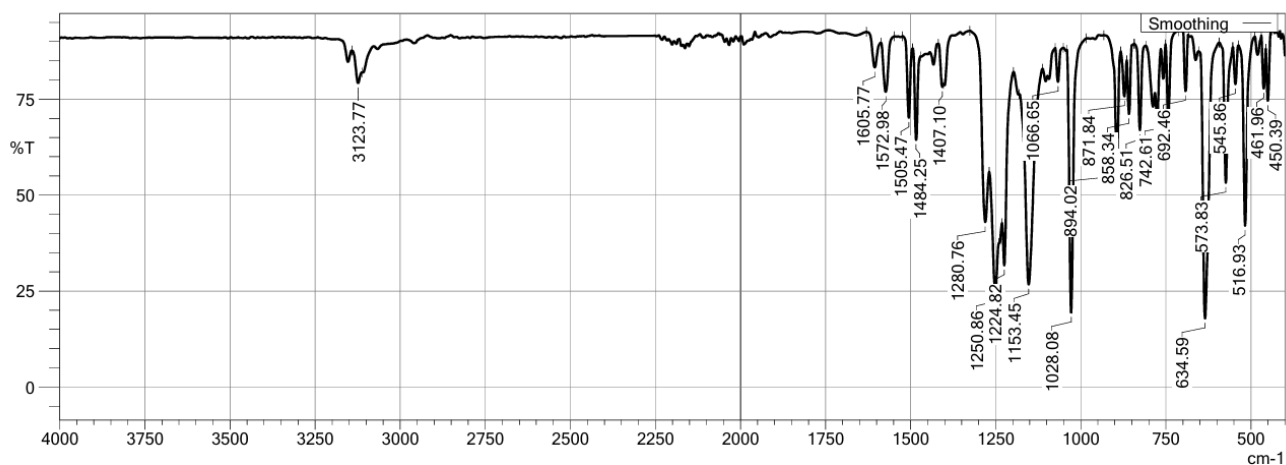

Fig. S118. IR data of compound **4d**

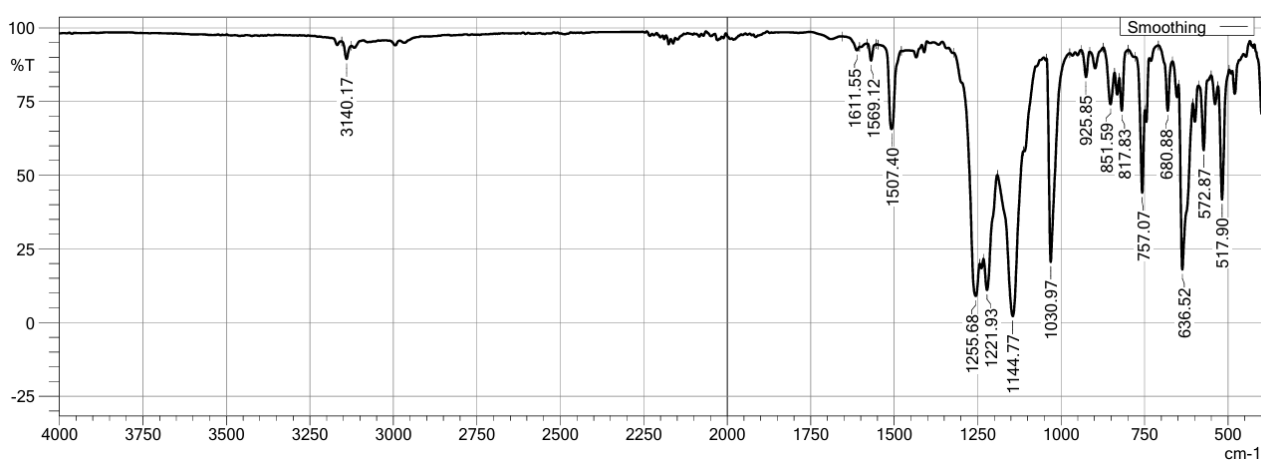

Fig. S119. IR data of compound **5d**

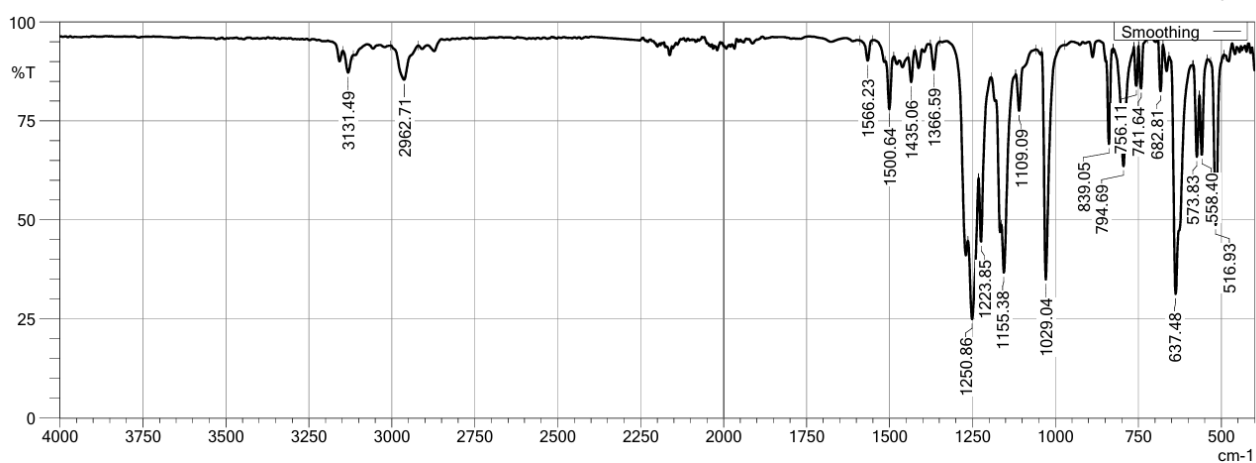

Fig. S120. IR data of compound **6d**

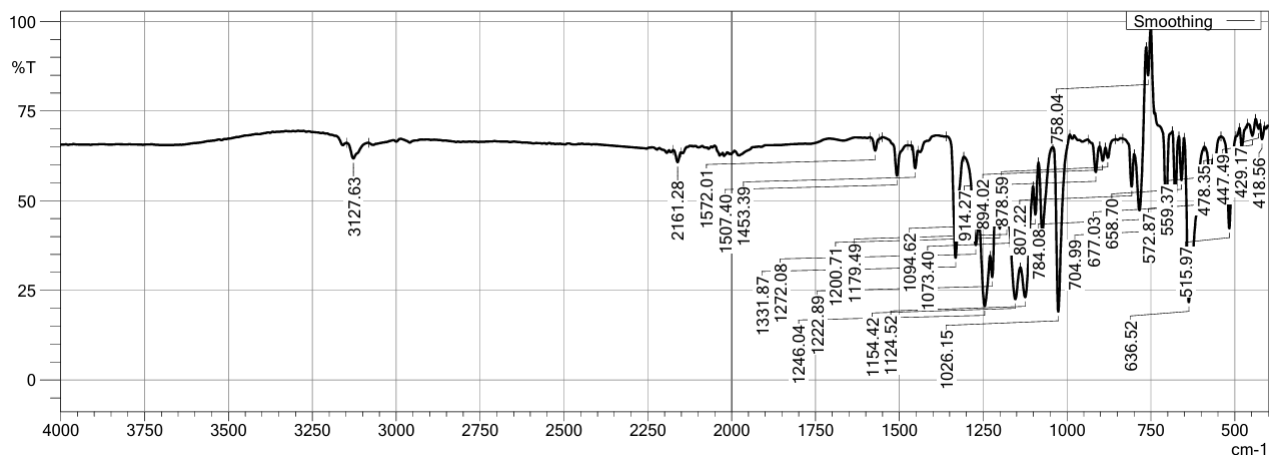

Fig. S121. IR data of compound 7d

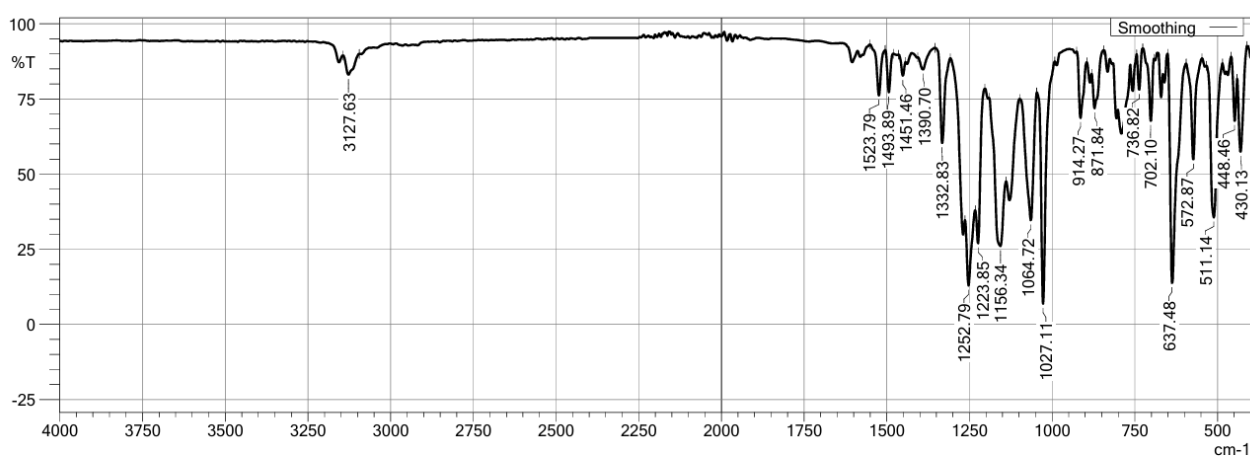

Fig. S122. IR data of compound 8d

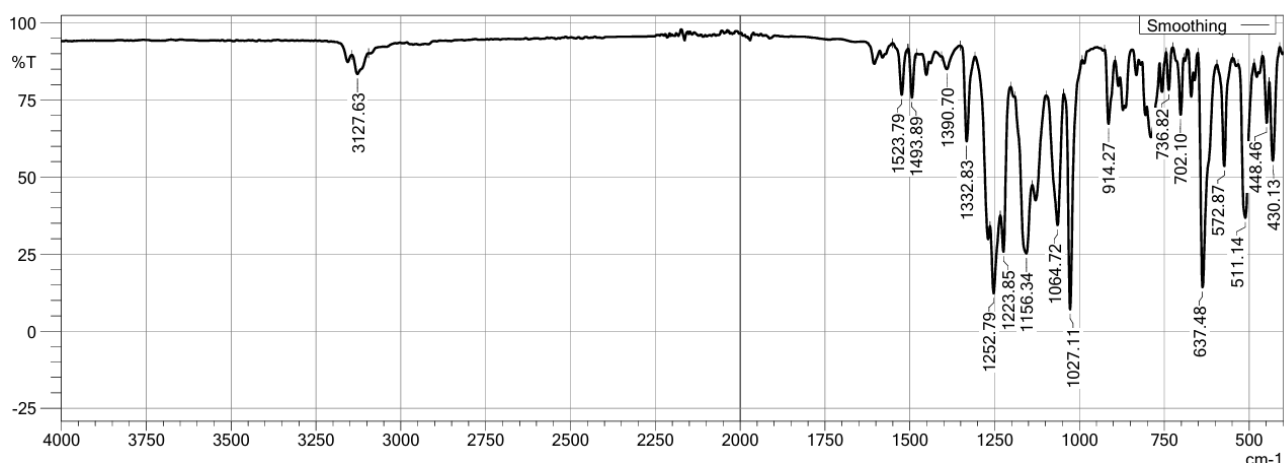

Fig. S123. IR data of compound 1e

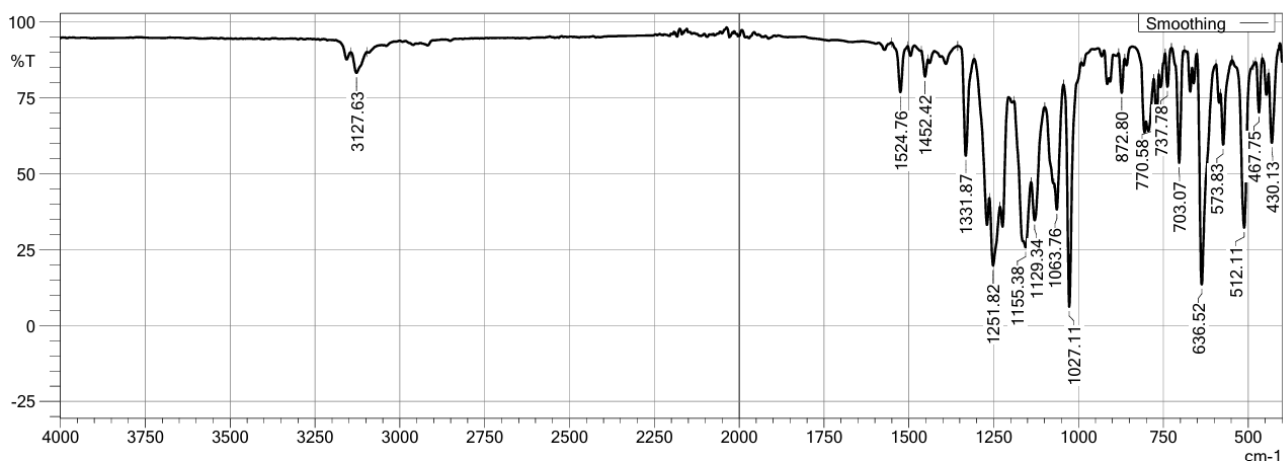

Fig. S124. IR data of compound 2e

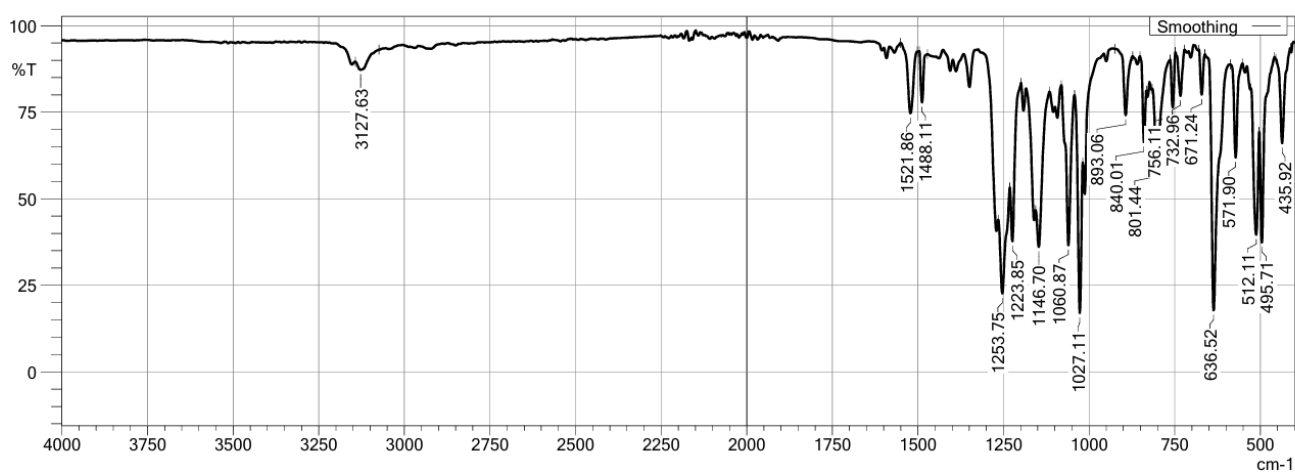

Fig. S125. IR data of compound 3e

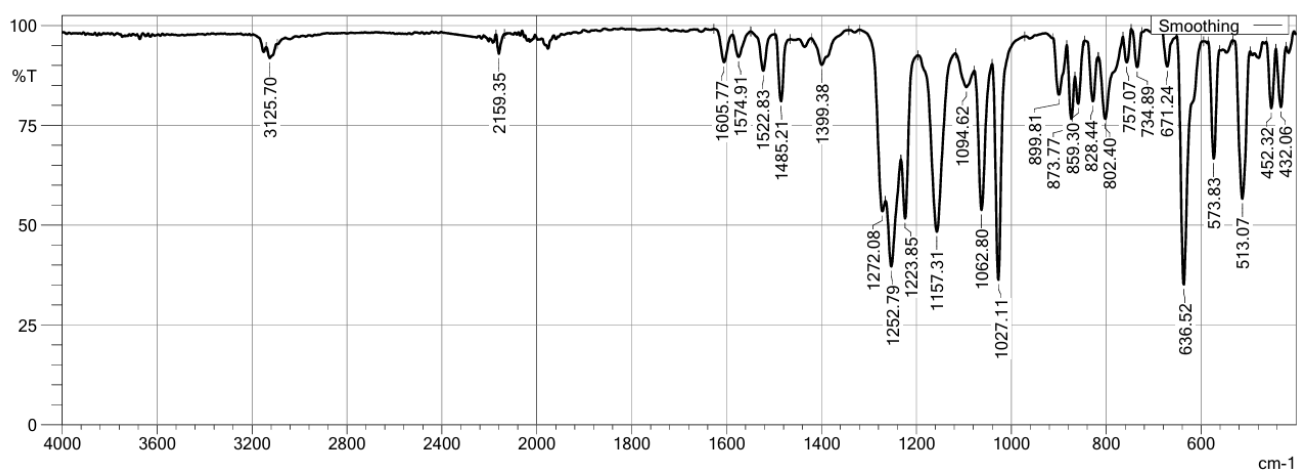

Fig. S126. IR data of compound 4e

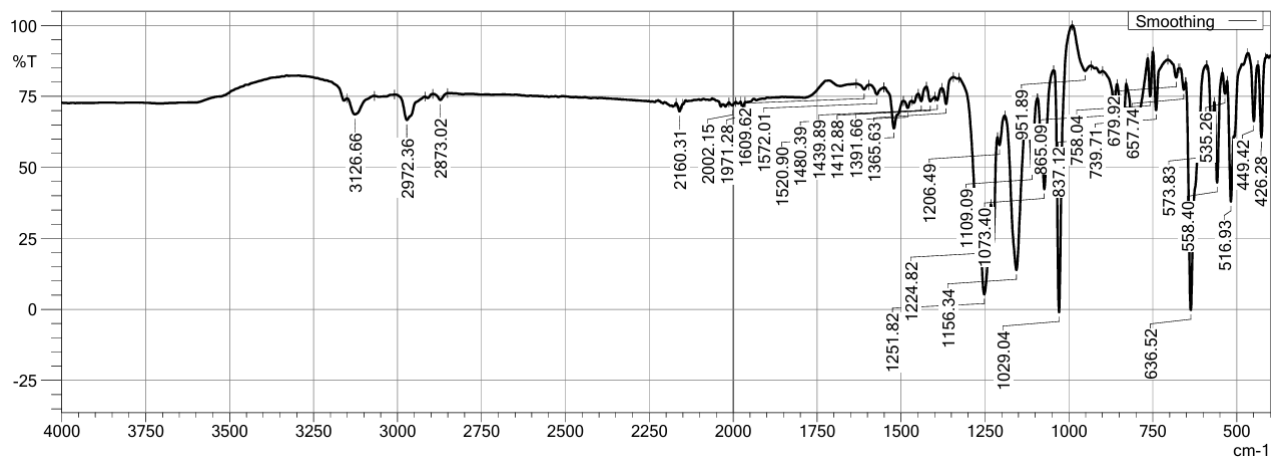

Fig. S127. IR data of compound 5e

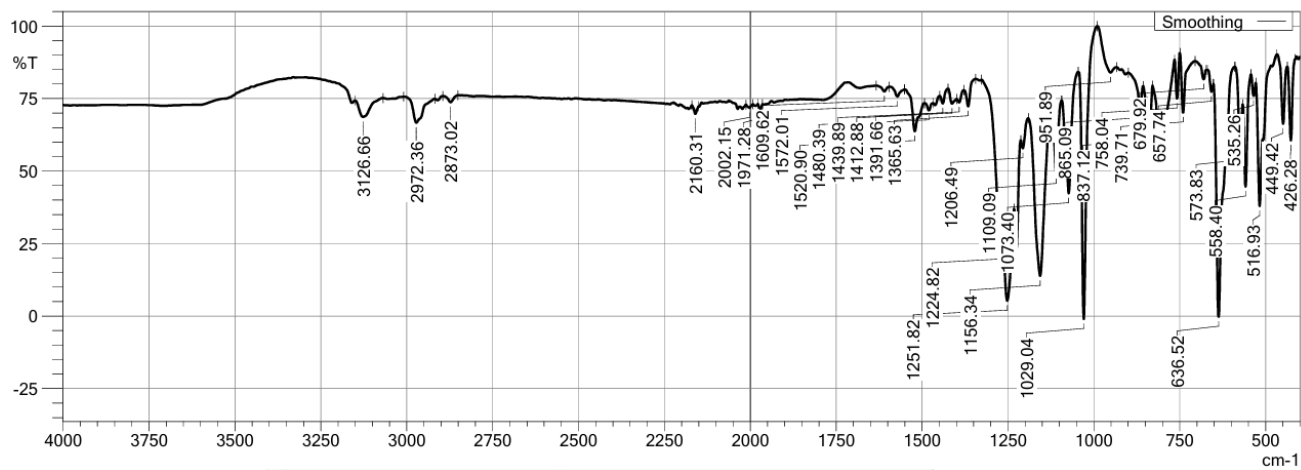

Fig. S128. IR data of compound 6e

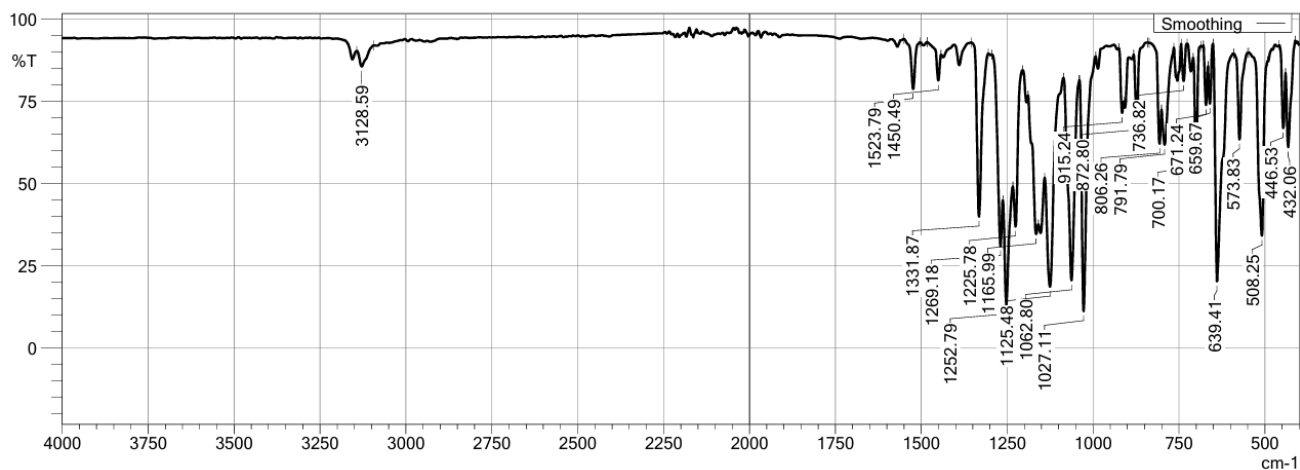

Fig. S129. IR data of compound 7e

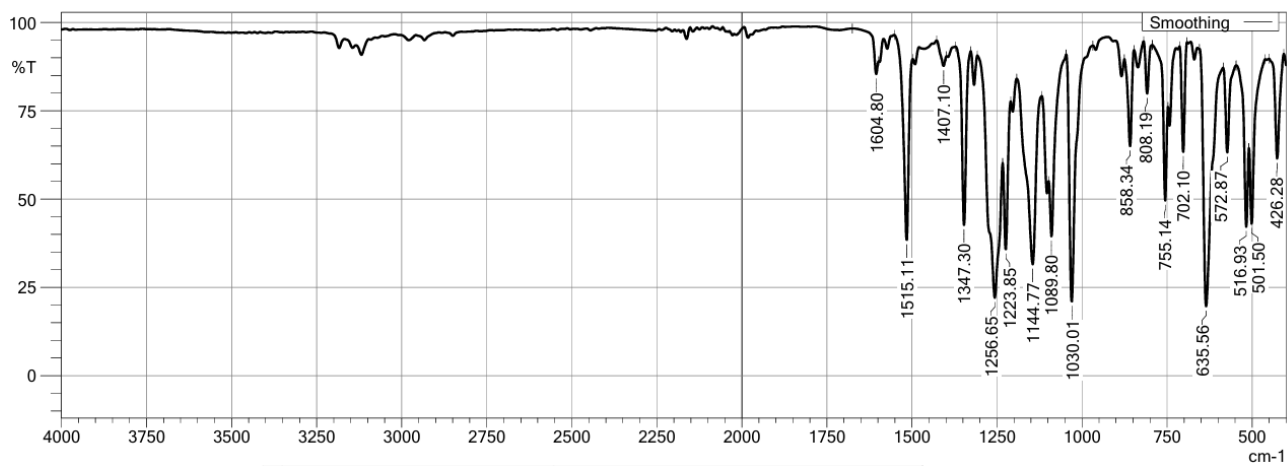

Fig. S130. IR data of compound **8e**

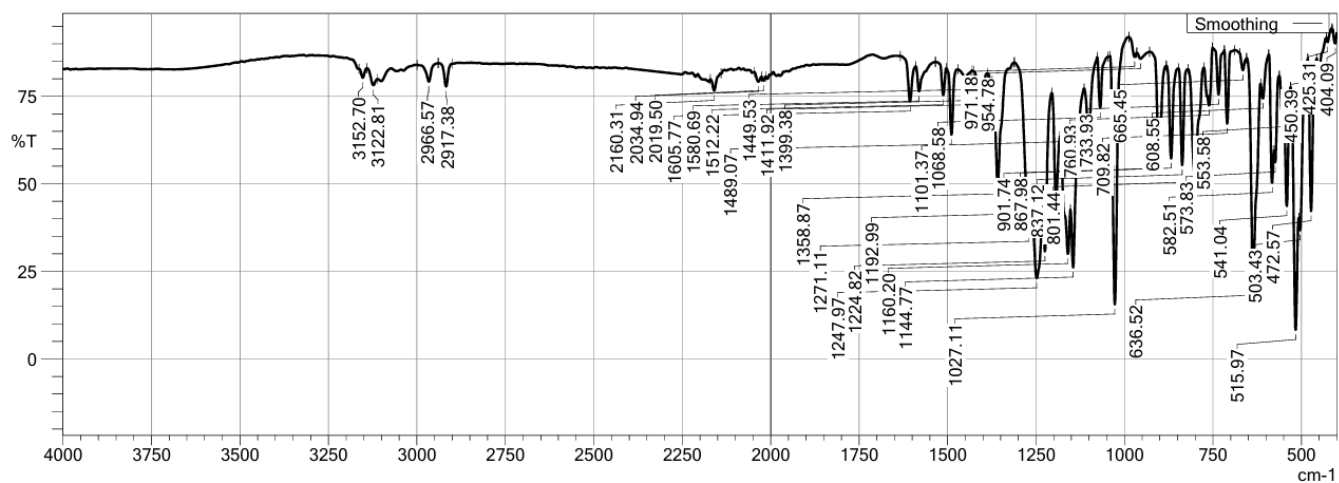

Fig. S131. IR data of compound **1f**

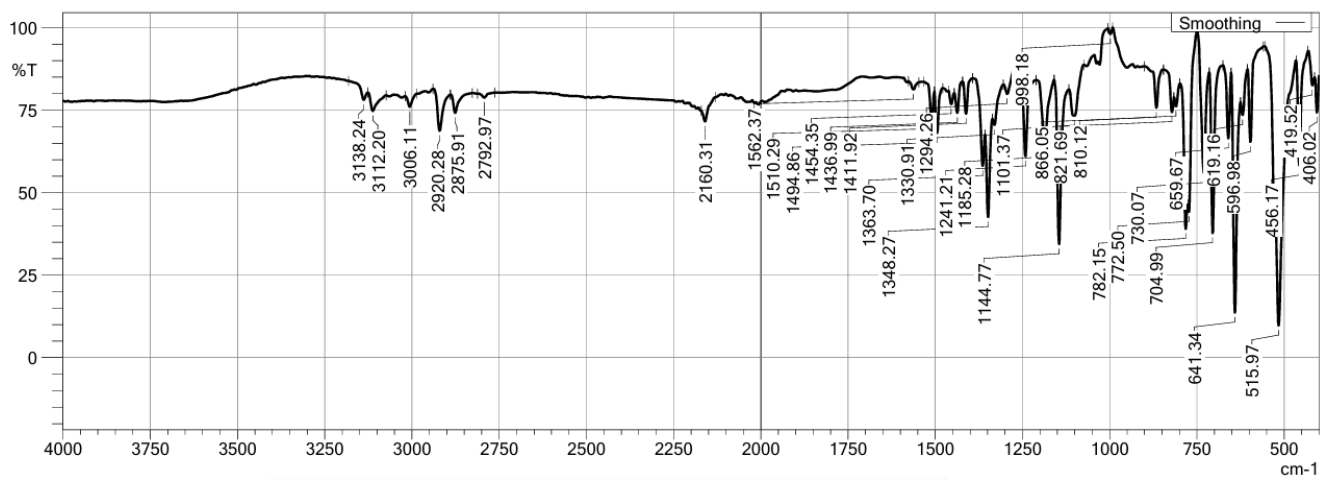

Fig. S132. IR data of compound **2f**

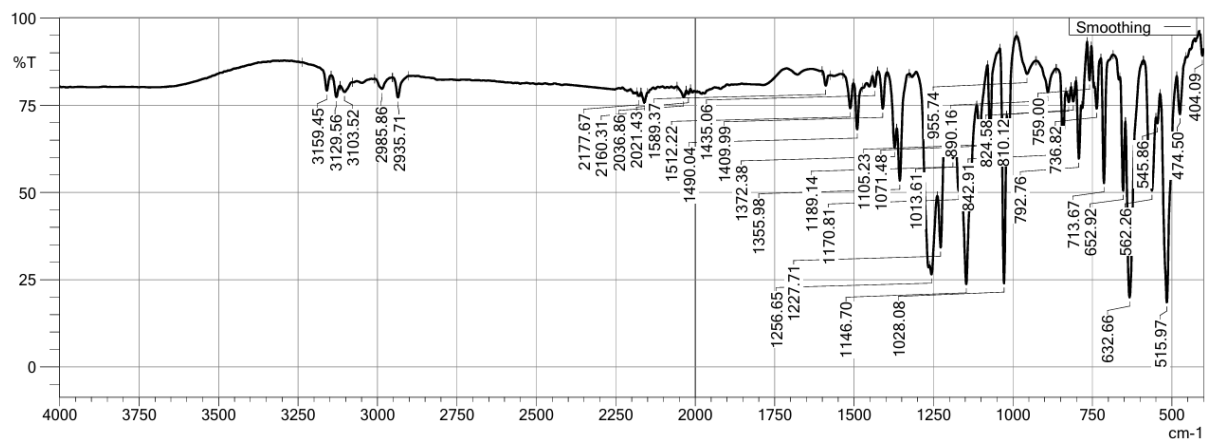

Fig. S133. IR data of compound 3f

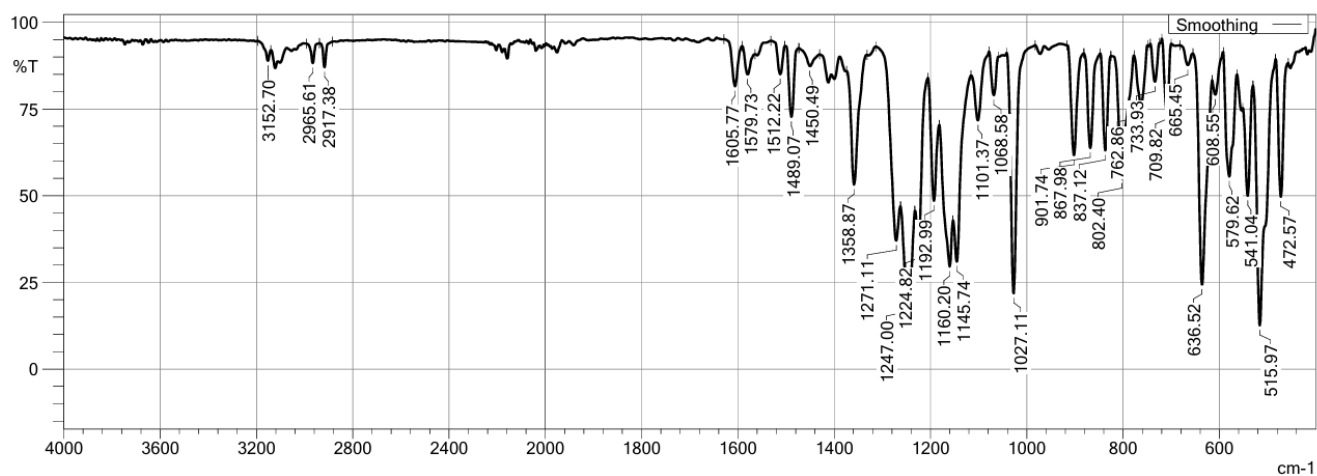

Fig. S134. IR data of compound 4f

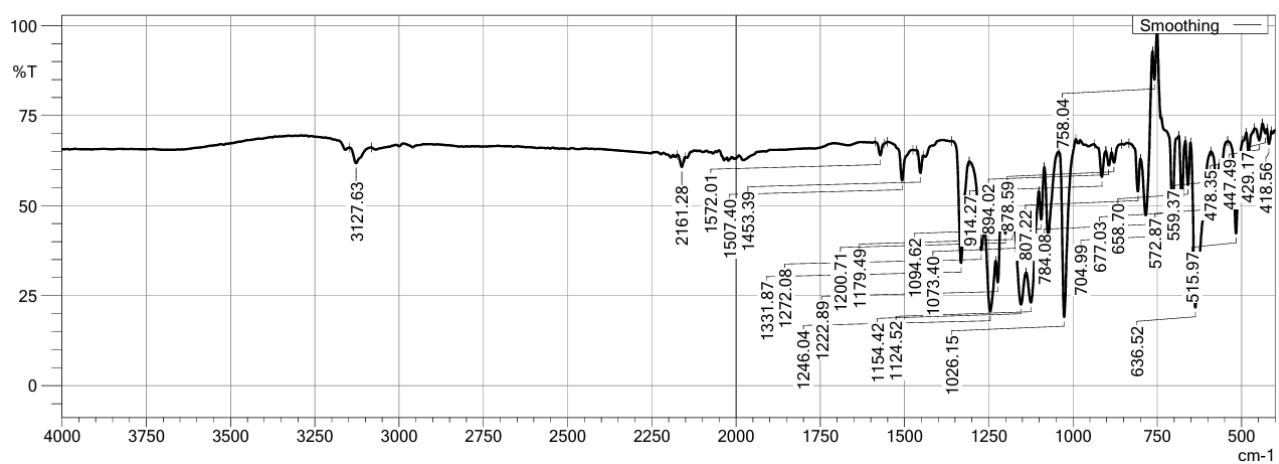

Fig. S135. IR data of compound 5f



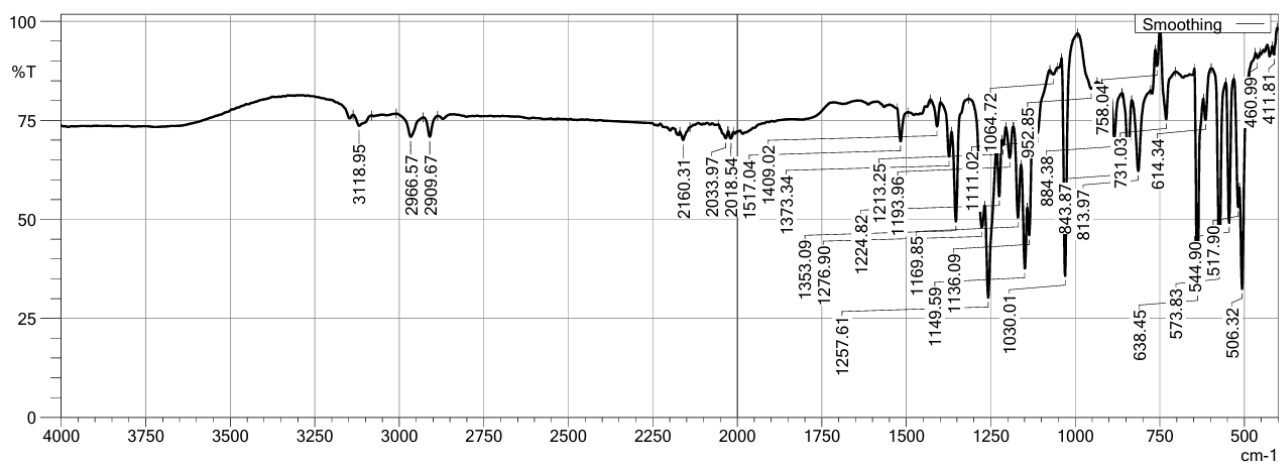

Fig. S136. IR data of compound 6f

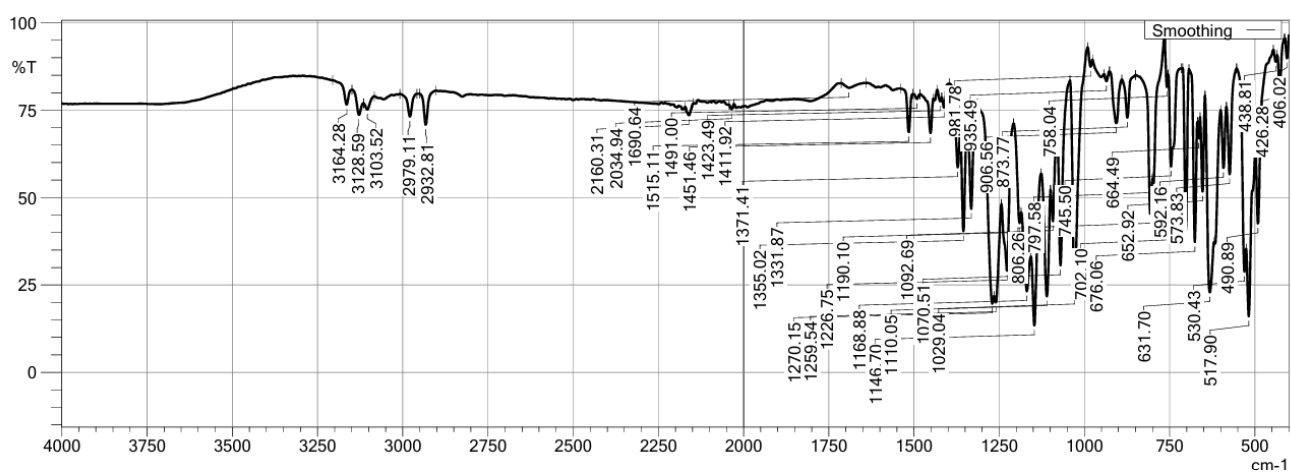

Fig. S137. IR data of compound 7f

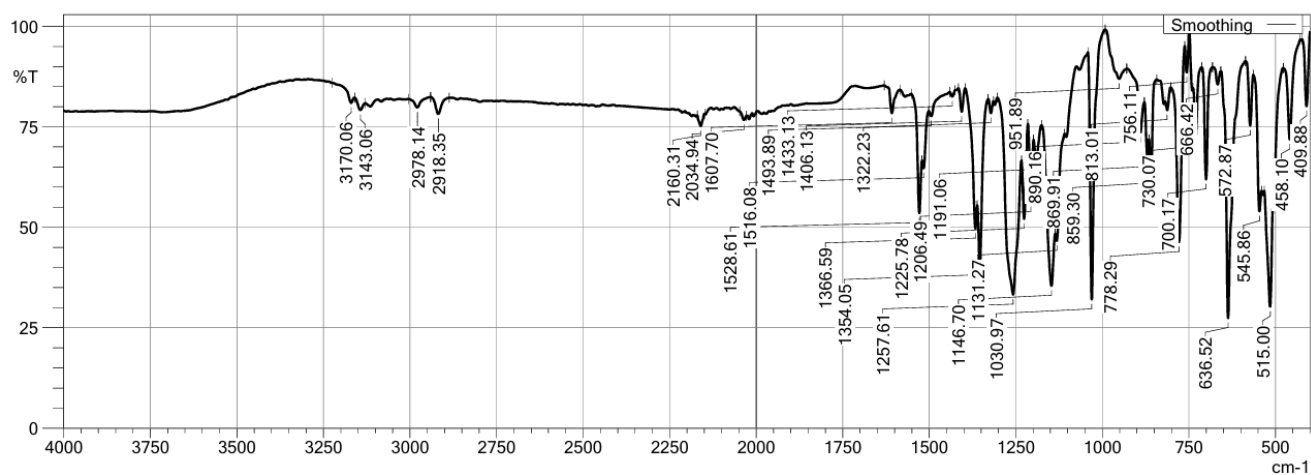

Fig. S138. IR data of compound 8f

# HRMS DATAS OF THE COMPOUNDS (1d-8d)

## (Compound 1d)

### Peak Spec

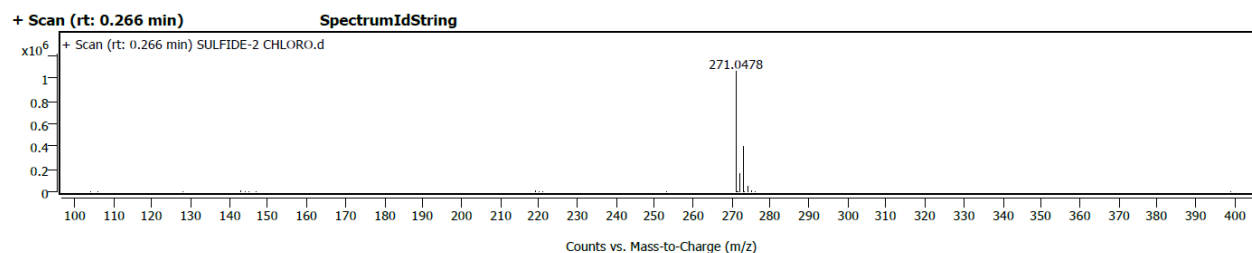

| SpectrumIdString | m/z      | Z | Abund   | Abund % | m/z (Calc) | Diff (ppm) | Ion Species | Formula | Ion Type |
|------------------|----------|---|---------|---------|------------|------------|-------------|---------|----------|
|                  | 271.0478 | 1 | 1059720 | 100.00  |            |            |             |         |          |
|                  | 271.0850 |   | 44763   | 4.22    |            |            |             |         |          |
|                  | 271.1331 |   | 25904   | 2.44    |            |            |             |         |          |
|                  | 272.0508 | 1 | 160251  | 15.12   |            |            |             |         |          |
|                  | 272.0598 |   | 22309   | 2.11    |            |            |             |         |          |
|                  | 273.0447 | 1 | 401807  | 37.92   |            |            |             |         |          |
|                  | 273.0800 |   | 14144   | 1.33    |            |            |             |         |          |
|                  | 274.0477 | 1 | 45160   | 4.26    |            |            |             |         |          |

Fig. S139. HRMS spectrum of compound 1d

## (Compound 2d)

### Peak Spec

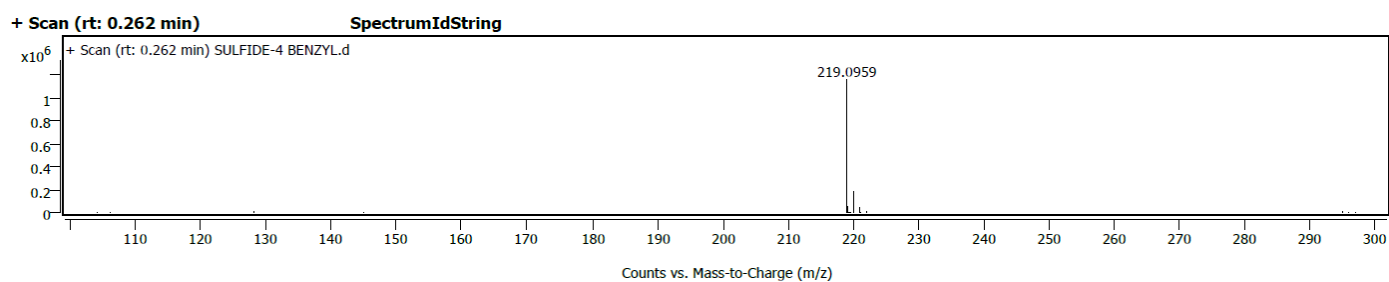

| SpectrumIdString | m/z      | Z | Abund   | Abund % | m/z (Calc) | Diff (ppm) | Ion Species | Formula | Ion Type |
|------------------|----------|---|---------|---------|------------|------------|-------------|---------|----------|
|                  | 219.0959 | 1 | 1155276 | 100.00  |            |            |             |         |          |
|                  | 219.1296 |   | 47360   | 4.10    |            |            |             |         |          |
|                  | 219.1728 |   | 27160   | 2.35    |            |            |             |         |          |
|                  | 220.0990 | 1 | 179415  | 15.53   |            |            |             |         |          |
|                  | 221.0919 |   | 39266   | 3.40    |            |            |             |         |          |
|                  | 221.1005 | 1 | 16401   | 1.42    |            |            |             |         |          |

Fig. S140. HRMS spectrum of compound 2d

# (Compound 3d)

## Peak Spec

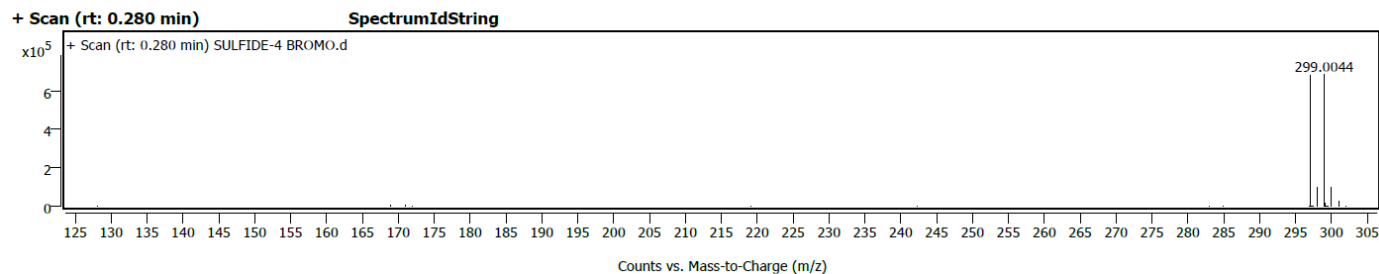

| <i>SpectrumIdString</i> | <i>m/z</i> | <i>Z</i> | <b>Abund</b> | <b>Abund %</b> | <i>m/z (Calc)</i> | <i>Diff (ppm)</i> | <i>Ion Species</i> | <i>Formula</i> | <i>Ion Type</i> |
|-------------------------|------------|----------|--------------|----------------|-------------------|-------------------|--------------------|----------------|-----------------|
|                         | 297.0065   | 1        | 678076       | 99.11          |                   |                   |                    |                |                 |
|                         | 297.0450   |          | 29441        | 4.30           |                   |                   |                    |                |                 |
|                         | 298.0096   | 1        | 96980        | 14.18          |                   |                   |                    |                |                 |
|                         | 299.0044   | 1        | 684141       | 100.00         |                   |                   |                    |                |                 |
|                         | 299.0428   |          | 30887        | 4.51           |                   |                   |                    |                |                 |
|                         | 299.0940   |          | 16664        | 2.44           |                   |                   |                    |                |                 |
|                         | 300.0074   | 1        | 97218        | 14.21          |                   |                   |                    |                |                 |
|                         | 301.0018   | 1        | 22810        | 3.33           |                   |                   |                    |                |                 |

Fig. S141. HRMS spectrum of compound **3d**

# (Compound 4d)

## Peak Spec

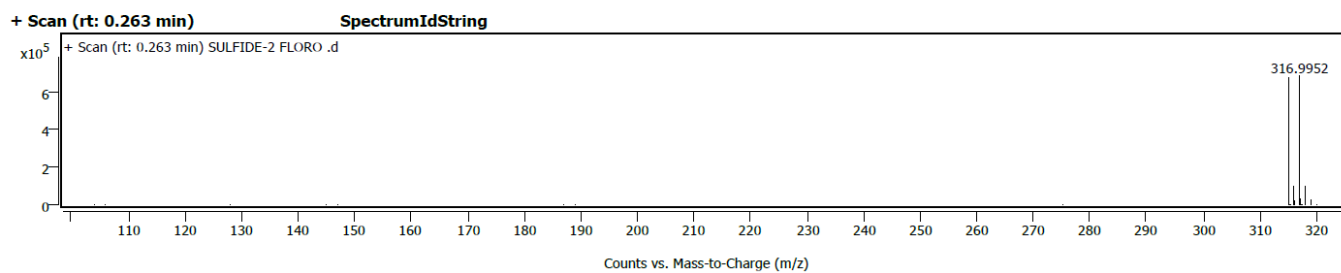

| <i>SpectrumIdString</i> | <i>m/z</i> | <i>Z</i> | <b>Abund</b> | <b>Abund %</b> | <i>m/z (Calc)</i> | <i>Diff (ppm)</i> | <i>Ion Species</i> | <i>Formula</i> | <i>Ion Type</i> |
|-------------------------|------------|----------|--------------|----------------|-------------------|-------------------|--------------------|----------------|-----------------|
|                         | 314.9973   | 1        | 671791       | 98.33          |                   |                   |                    |                |                 |
|                         | 315.0367   |          | 28262        | 4.14           |                   |                   |                    |                |                 |
|                         | 315.0890   |          | 17516        | 2.56           |                   |                   |                    |                |                 |
|                         | 316.0003   | 1        | 96041        | 14.06          |                   |                   |                    |                |                 |
|                         | 316.0115   |          | 18192        | 2.66           |                   |                   |                    |                |                 |
|                         | 316.9952   | 1        | 683233       | 100.00         |                   |                   |                    |                |                 |
|                         | 317.0347   |          | 30864        | 4.52           |                   |                   |                    |                |                 |
|                         | 317.0872   |          | 19132        | 2.80           |                   |                   |                    |                |                 |
|                         | 317.9984   | 1        | 95182        | 13.93          |                   |                   |                    |                |                 |
|                         | 318.9927   | 1        | 22961        | 3.36           |                   |                   |                    |                |                 |

Fig. S142. HRMS spectrum of compound **4d**

# (Compound 5d)

## Peak Spec

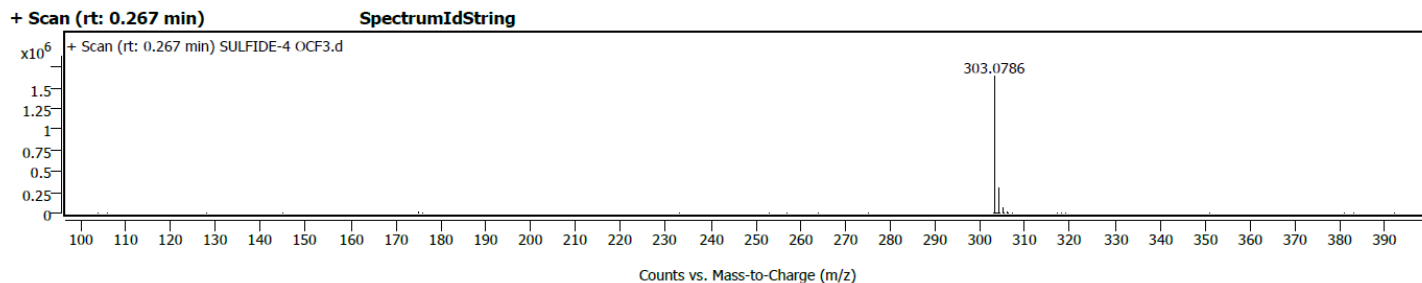

| SpectrumIdString | m/z      | Z | Abund   | Abund % | m/z (Calc) | Diff (ppm) | Ion Species | Formula | Ion Type |
|------------------|----------|---|---------|---------|------------|------------|-------------|---------|----------|
|                  | 303.0786 | 1 | 1630154 | 100.00  |            |            |             |         |          |
|                  | 303.0996 | 1 | 90715   | 5.56    |            |            |             |         |          |
|                  | 303.1180 |   | 76652   | 4.70    |            |            |             |         |          |
|                  | 303.1688 |   | 46090   | 2.83    |            |            |             |         |          |
|                  | 304.0815 | 1 | 292996  | 17.97   |            |            |             |         |          |
|                  | 304.0921 | 1 | 20264   | 1.24    |            |            |             |         |          |
|                  | 305.0762 | 1 | 59830   | 3.67    |            |            |             |         |          |

Fig. S143. HRMS spectrum of compound 5d

# (Compound 6d)

## Peak Spec

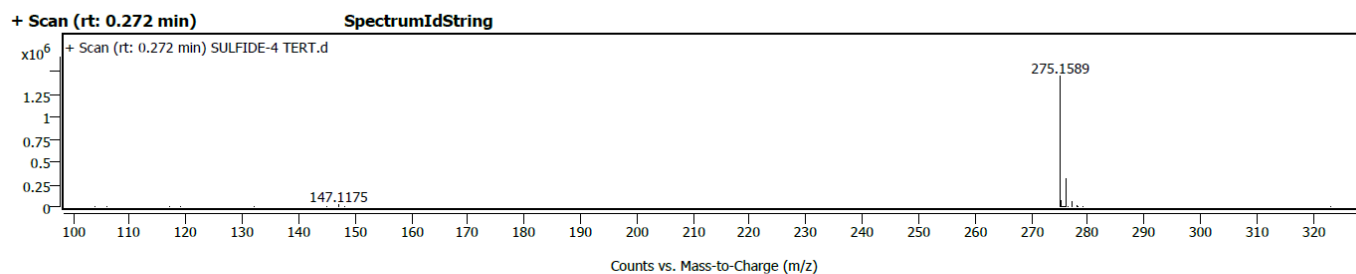

| SpectrumIdString | m/z      | Z | Abund   | Abund % | m/z (Calc) | Diff (ppm) | Ion Species | Formula | Ion Type |
|------------------|----------|---|---------|---------|------------|------------|-------------|---------|----------|
|                  | 147.1175 |   | 21984   | 1.52    |            |            |             |         |          |
|                  | 275.1589 | 1 | 1446506 | 100.00  |            |            |             |         |          |
|                  | 275.1793 | 1 | 71361   | 4.93    |            |            |             |         |          |
|                  | 275.1964 |   | 65994   | 4.56    |            |            |             |         |          |
|                  | 275.2449 |   | 41352   | 2.86    |            |            |             |         |          |
|                  | 276.1619 | 1 | 312441  | 21.60   |            |            |             |         |          |
|                  | 276.1718 | 1 | 22725   | 1.57    |            |            |             |         |          |
|                  | 277.1550 |   | 52456   | 3.63    |            |            |             |         |          |
|                  | 277.1625 | 1 | 35961   | 2.49    |            |            |             |         |          |

Fig. S144. HRMS spectrum of compound 6d

# (Compound 7d)

## User Spectra

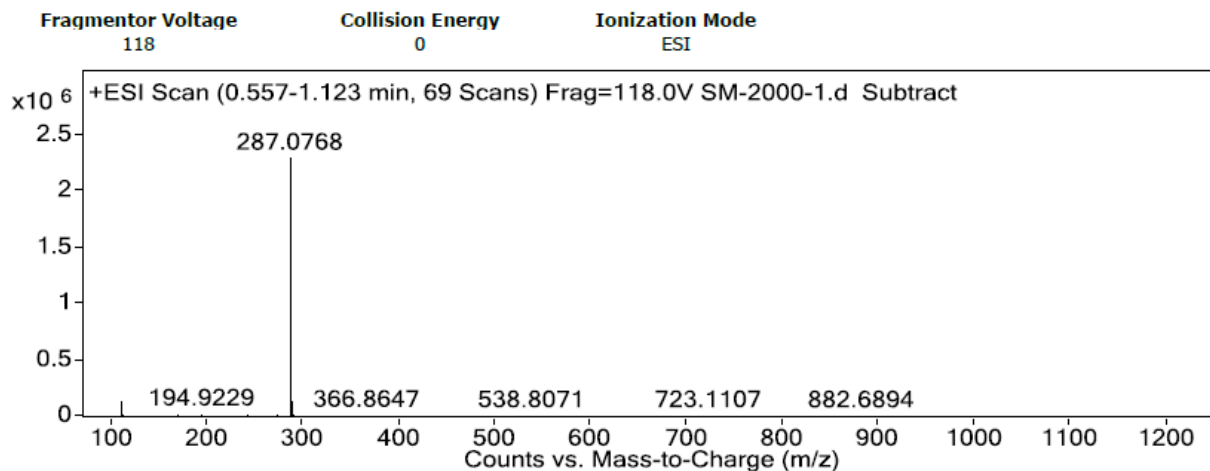

### Peak List

| m/z      | z | Abund      |
|----------|---|------------|
| 111.0352 | 1 | 136191.94  |
| 113.0504 | 1 | 12543.04   |
| 169.0754 | 1 | 9813.88    |
| 194.9229 | 1 | 17520.89   |
| 273.0583 | 1 | 13568.95   |
| 287.0768 | 1 | 2296812.75 |

Fig. S145. HRMS spectrum of compound 7d

# (Compound 8d)

## Peak Spec

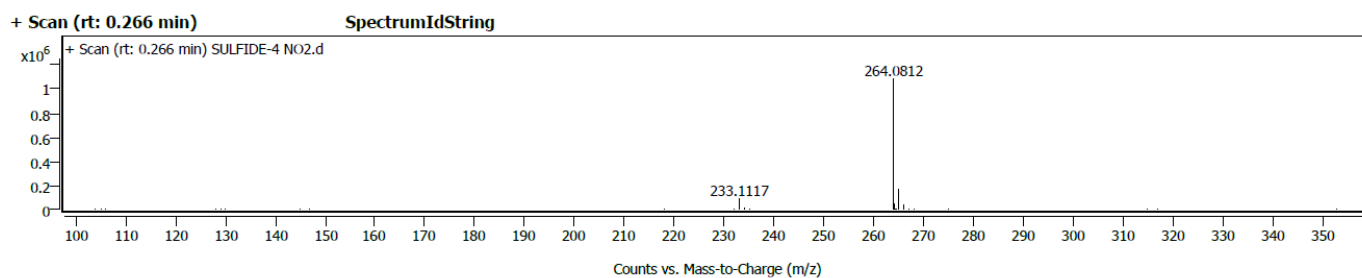

| SpectrumIdString | m/z      | Z | Abund   | Abund % | m/z (Calc) | Diff (ppm) | Ion Species | Formula | Ion Type |
|------------------|----------|---|---------|---------|------------|------------|-------------|---------|----------|
|                  | 233.1117 |   | 89056   | 8.21    |            |            |             |         |          |
|                  | 264.0812 | 1 | 1085375 | 100.00  |            |            |             |         |          |
|                  | 264.1181 |   | 46757   | 4.31    |            |            |             |         |          |
|                  | 264.1656 |   | 24965   | 2.30    |            |            |             |         |          |
|                  | 265.0842 | 1 | 167222  | 15.41   |            |            |             |         |          |
|                  | 265.0931 |   | 21625   | 1.99    |            |            |             |         |          |
|                  | 266.0791 | 1 | 36637   | 3.38    |            |            |             |         |          |

Fig. S146. HRMS spectrum of compound 8d

# HRMS DATAS OF THE COMPOUNDS (1e-8e)

## (Compound 1e)

### Peak Spec

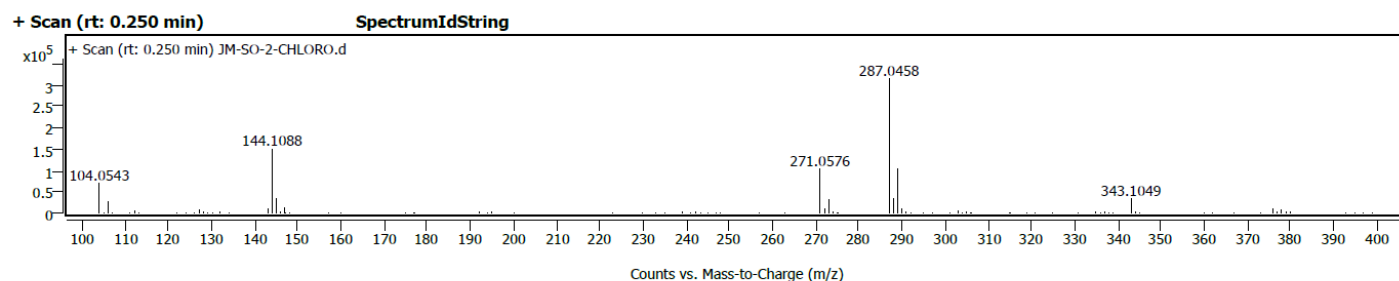

| SpectrumIdString |   | Abund  | Abund % | m/z (Calc) | Diff (ppm) | Ion Species | Formula | Ion Type |
|------------------|---|--------|---------|------------|------------|-------------|---------|----------|
| m/z              | Z |        |         |            |            |             |         |          |
| 104.0543         |   | 69003  | 21.95   |            |            |             |         |          |
| 106.0512         |   | 26920  | 8.56    |            |            |             |         |          |
| 144.1088         |   | 150187 | 47.77   |            |            |             |         |          |
| 145.0552         |   | 34238  | 10.89   |            |            |             |         |          |
| 271.0576         |   | 103506 | 32.92   |            |            |             |         |          |
| 273.0538         |   | 31716  | 10.09   |            |            |             |         |          |
| 287.0458         | 1 | 314397 | 100.00  |            |            |             |         |          |
| 288.0487         | 1 | 34011  | 10.82   |            |            |             |         |          |
| 289.0419         | 1 | 104630 | 33.28   |            |            |             |         |          |
| 343.1049         |   | 32492  | 10.33   |            |            |             |         |          |

Fig. S147. HRMS spectrum of compound 1e

## (Compound 2e)

### Peak Spec

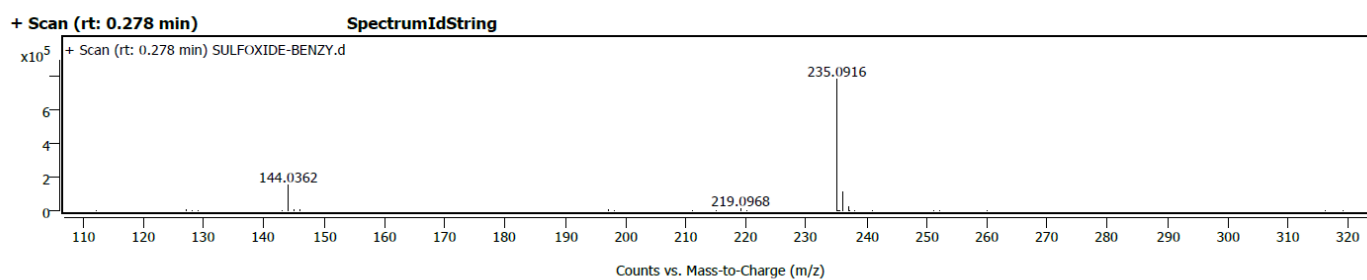

| SpectrumIdString |   | Abund  | Abund % | m/z (Calc) | Diff (ppm) | Ion Species | Formula | Ion Type |
|------------------|---|--------|---------|------------|------------|-------------|---------|----------|
| m/z              | Z |        |         |            |            |             |         |          |
| 144.0362         |   | 154159 | 19.51   |            |            |             |         |          |
| 144.0438         |   | 14706  | 1.86    |            |            |             |         |          |
| 219.0968         |   | 10498  | 1.33    |            |            |             |         |          |
| 235.0916         | 1 | 789985 | 100.00  |            |            |             |         |          |
| 235.1259         |   | 30822  | 3.90    |            |            |             |         |          |
| 236.0946         | 1 | 111757 | 14.15   |            |            |             |         |          |
| 237.0877         |   | 25612  | 3.24    |            |            |             |         |          |
| 237.0957         | 1 | 13033  | 1.65    |            |            |             |         |          |

Fig. S148. HRMS spectrum of compound 2e

# (Compound 3e)

## Peak Spec

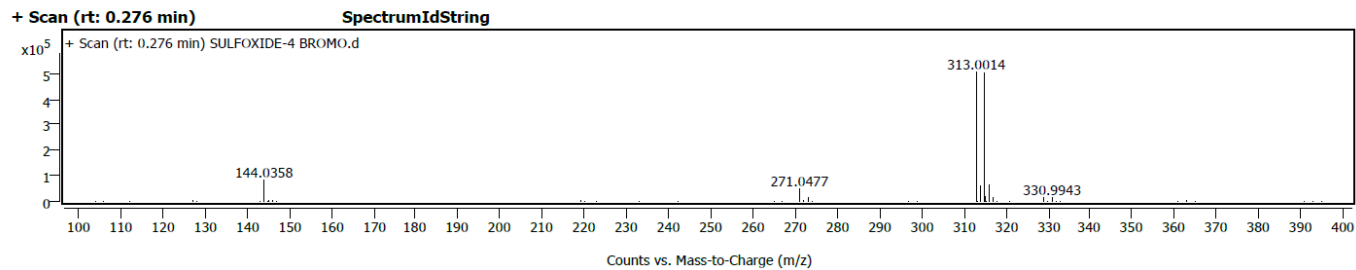

| SpectrumIdString | m/z      | Z | Abund  | Abund % | m/z (Calc) | Diff (ppm) | Ion Species | Formula | Ion Type |
|------------------|----------|---|--------|---------|------------|------------|-------------|---------|----------|
|                  | 144.0358 |   | 82062  | 16.23   |            |            |             |         |          |
|                  | 271.0477 |   | 47281  | 9.35    |            |            |             |         |          |
|                  | 313.0014 | 1 | 505570 | 100.00  |            |            |             |         |          |
|                  | 313.0402 |   | 19244  | 3.81    |            |            |             |         |          |
|                  | 314.0047 | 1 | 58870  | 11.64   |            |            |             |         |          |
|                  | 314.9993 | 1 | 504272 | 99.74   |            |            |             |         |          |
|                  | 315.0381 |   | 18756  | 3.71    |            |            |             |         |          |
|                  | 316.0024 | 1 | 62851  | 12.43   |            |            |             |         |          |
|                  | 316.9972 | 1 | 13845  | 2.74    |            |            |             |         |          |
|                  | 330.9943 |   | 14815  | 2.93    |            |            |             |         |          |

Fig. S149. HRMS spectrum of compound 3e

# (Compound 4e)

## Peak Spec

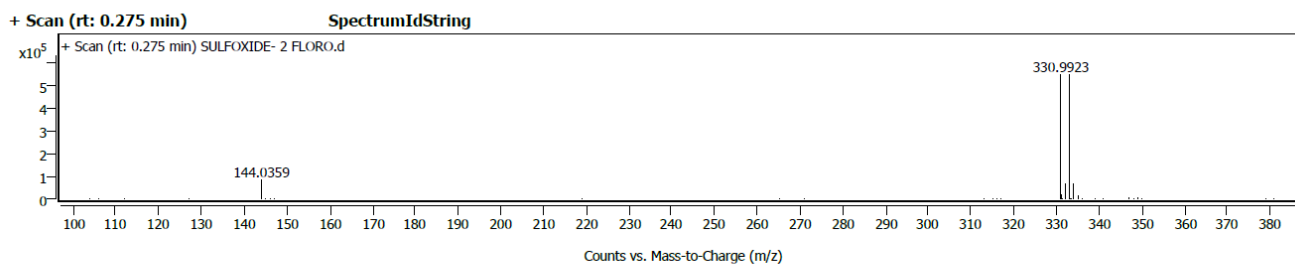

| SpectrumIdString | m/z      | Z | Abund  | Abund % | m/z (Calc) | Diff (ppm) | Ion Species | Formula | Ion Type |
|------------------|----------|---|--------|---------|------------|------------|-------------|---------|----------|
|                  | 144.0359 |   | 84826  | 15.44   |            |            |             |         |          |
|                  | 330.9923 | 1 | 549323 | 100.00  |            |            |             |         |          |
|                  | 331.0323 |   | 20964  | 3.82    |            |            |             |         |          |
|                  | 331.0863 |   | 13576  | 2.47    |            |            |             |         |          |
|                  | 331.9954 | 1 | 68678  | 12.50   |            |            |             |         |          |
|                  | 332.9902 | 1 | 548939 | 99.93   |            |            |             |         |          |
|                  | 333.0301 |   | 22152  | 4.03    |            |            |             |         |          |
|                  | 333.0847 |   | 12982  | 2.36    |            |            |             |         |          |
|                  | 333.9933 | 1 | 69048  | 12.57   |            |            |             |         |          |
|                  | 334.9881 | 1 | 15917  | 2.90    |            |            |             |         |          |

Fig. S150. HRMS spectrum of compound 4e

# (Compound 5e)

## Peak Spec

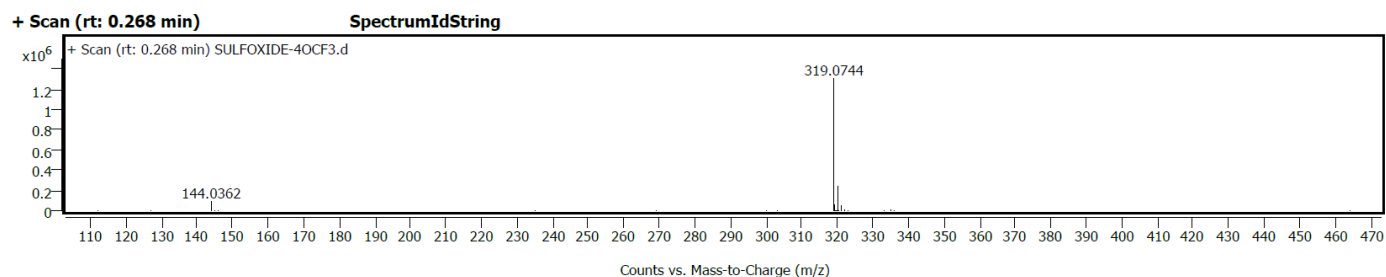

| SpectrumIdString | m/z      | Z | Abund   | Abund % | m/z (Calc) | Diff (ppm) | Ion Species | Formula | Ion Type |
|------------------|----------|---|---------|---------|------------|------------|-------------|---------|----------|
|                  | 144.0362 |   | 94561   | 7.24    |            |            |             |         |          |
|                  | 319.0744 | 1 | 1306992 | 100.00  |            |            |             |         |          |
|                  | 319.0964 | 1 | 57612   | 4.41    |            |            |             |         |          |
|                  | 319.1147 |   | 54508   | 4.17    |            |            |             |         |          |
|                  | 319.1670 |   | 36223   | 2.77    |            |            |             |         |          |
|                  | 320.0773 | 1 | 240371  | 18.39   |            |            |             |         |          |
|                  | 320.0883 | 1 | 22806   | 1.74    |            |            |             |         |          |
|                  | 321.0725 | 1 | 48561   | 3.72    |            |            |             |         |          |

Fig. S151. HRMS spectrum of compound 5e

# (Compound 6e)

## Peak Spec

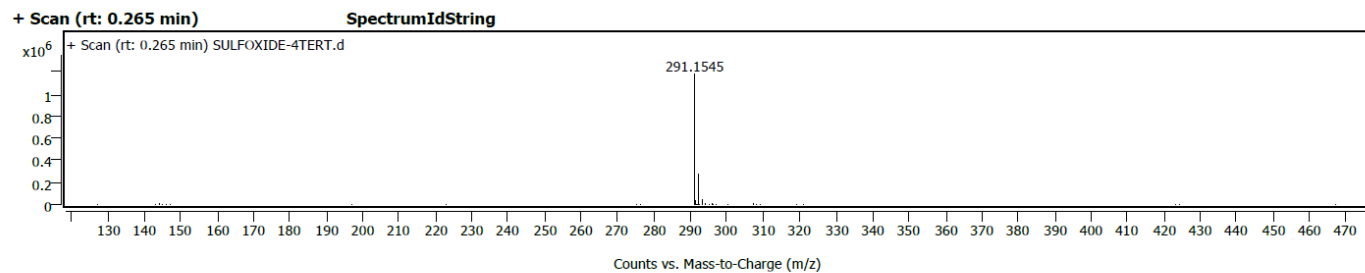

| SpectrumIdString | m/z      | Z | Abund   | Abund % | m/z (Calc) | Diff (ppm) | Ion Species | Formula | Ion Type |
|------------------|----------|---|---------|---------|------------|------------|-------------|---------|----------|
|                  | 291.1545 | 1 | 1183333 | 100.00  |            |            |             |         |          |
|                  | 291.1757 |   | 48804   | 4.12    |            |            |             |         |          |
|                  | 291.1932 |   | 50444   | 4.26    |            |            |             |         |          |
|                  | 291.2429 |   | 29913   | 2.53    |            |            |             |         |          |
|                  | 292.1575 | 1 | 273633  | 23.12   |            |            |             |         |          |
|                  | 293.1536 | 1 | 42725   | 3.61    |            |            |             |         |          |

Fig. S152. HRMS spectrum of compound 6e



# (Compound 7e)

## User Spectra

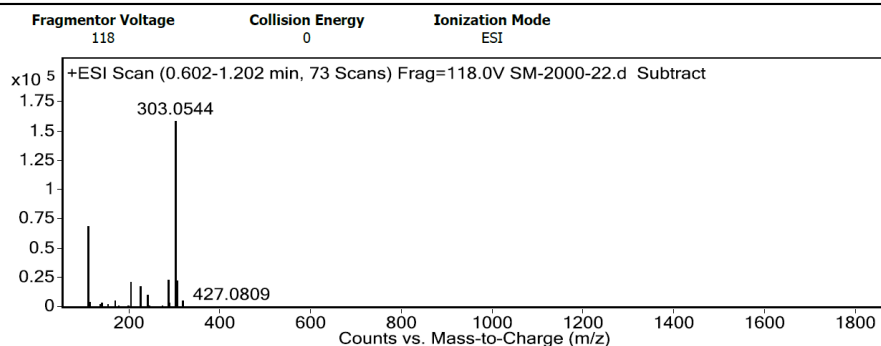

### Peak List

| <i>m/z</i> | <i>z</i> | Abund     |
|------------|----------|-----------|
| 108.9868   | 1        | 6364.35   |
| 110.9521   | 1        | 69461.4   |
| 203.0189   | 1        | 21658.67  |
| 225.0074   | 1        | 18221.76  |
| 242.2513   | 1        | 10799.57  |
| 287.0568   | 1        | 23602.17  |
| 303.0544   | 1        | 159331.55 |
| 304.0567   | 1        | 22652.58  |
| 305.0524   | 1        | 7896.24   |
| 319.0544   | 1        | 5993.04   |

## Compounds

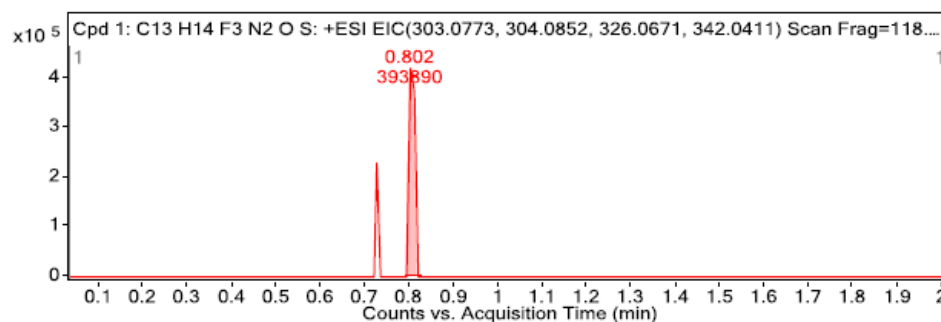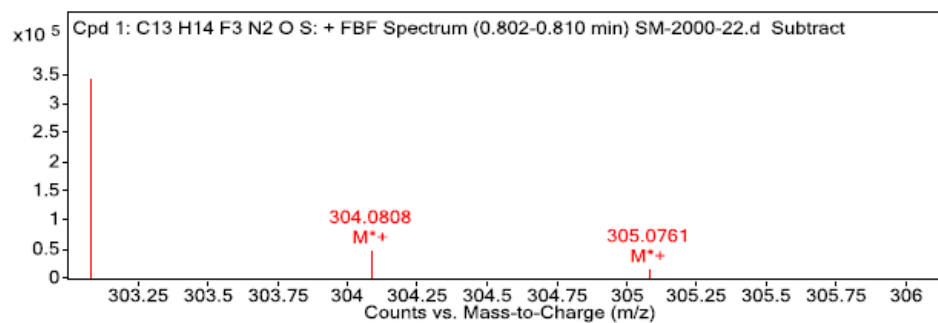

### Peak List

| <i>m/z</i> | <i>z</i> | Abund     | Formula      | Ion |
|------------|----------|-----------|--------------|-----|
| 303.0785   | 1        | 344159.31 | C13H14F3N2O5 | M*+ |
| 304.0808   | 1        | 49666.82  | C13H14F3N2O5 | M*+ |
| 305.0761   | 1        | 17474.68  | C13H14F3N2O5 | M*+ |
| 306.0796   | 1        | 2907.25   | C13H14F3N2O5 | M*+ |

Fig. S153. HRMS spectrum of compound 7e

# (Compound 8e)

## Peak Spec

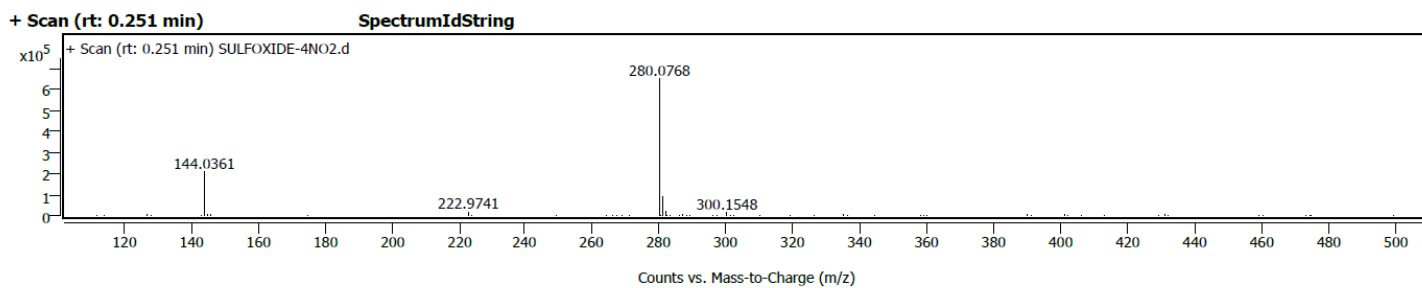

| <i>SpectrumIdString</i> | m/z      | Z | Abund  | Abund % | m/z (Calc) | Diff (ppm) | Ion Species | Formula | Ion Type |
|-------------------------|----------|---|--------|---------|------------|------------|-------------|---------|----------|
|                         | 144.0361 |   | 208550 | 32.14   |            |            |             |         |          |
|                         | 144.0439 |   | 18083  | 2.79    |            |            |             |         |          |
|                         | 222.9741 |   | 15717  | 2.42    |            |            |             |         |          |
|                         | 280.0768 | 1 | 648800 | 100.00  |            |            |             |         |          |
|                         | 280.1140 |   | 25264  | 3.89    |            |            |             |         |          |
|                         | 281.0800 | 1 | 87546  | 13.49   |            |            |             |         |          |
|                         | 282.0753 | 1 | 20297  | 3.13    |            |            |             |         |          |
|                         | 300.1548 |   | 13711  | 2.11    |            |            |             |         |          |

Fig. S154. HRMS spectrum of compound 8e

# HRMS DATAS OF THE COMPOUNDS (1f-8f)

## (Compound 1f)

### Peak Spec

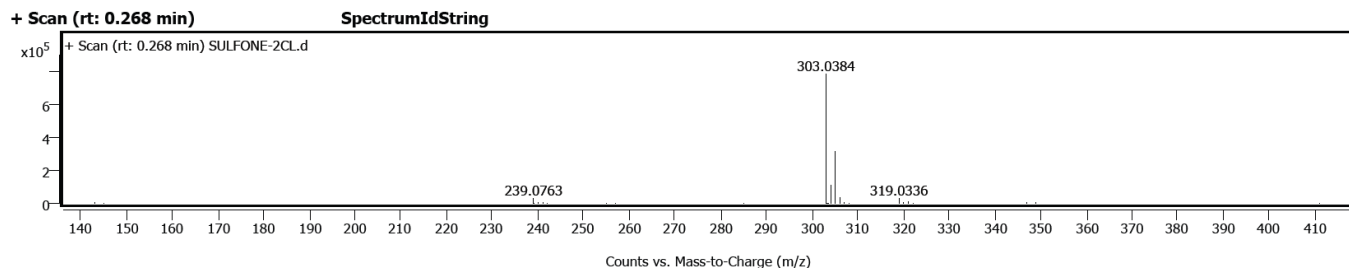

| <i>SpectrumIdString</i> | m/z      | Z | Abund  | Abund % | m/z (Calc) | Diff (ppm) | Ion Species | Formula | Ion Type |
|-------------------------|----------|---|--------|---------|------------|------------|-------------|---------|----------|
|                         | 239.0763 |   | 27802  | 3.56    |            |            |             |         |          |
|                         | 303.0384 | 1 | 780786 | 100.00  |            |            |             |         |          |
|                         | 303.0772 |   | 32740  | 4.19    |            |            |             |         |          |
|                         | 303.1287 |   | 18481  | 2.37    |            |            |             |         |          |
|                         | 304.0415 | 1 | 110332 | 14.13   |            |            |             |         |          |
|                         | 305.0354 | 1 | 313860 | 40.20   |            |            |             |         |          |
|                         | 305.0447 |   | 25005  | 3.20    |            |            |             |         |          |
|                         | 306.0386 | 1 | 33308  | 4.27    |            |            |             |         |          |
|                         | 319.0336 |   | 27904  | 3.57    |            |            |             |         |          |

Fig. S155. HRMS spectrum of compound 1f

## (Compound 2f)

### Peak Spec

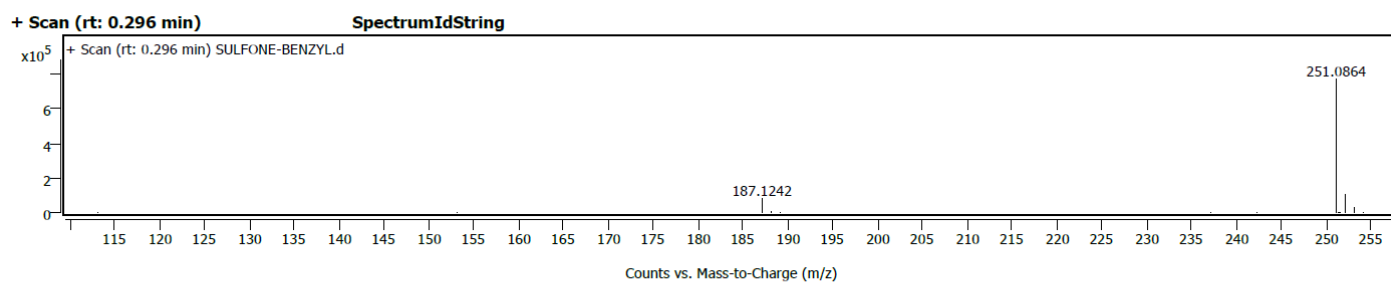

| <i>SpectrumIdString</i> | m/z      | Z | Abund  | Abund % | m/z (Calc) | Diff (ppm) | Ion Species | Formula | Ion Type |
|-------------------------|----------|---|--------|---------|------------|------------|-------------|---------|----------|
|                         | 187.1242 |   | 80195  | 10.38   |            |            |             |         |          |
|                         | 251.0864 | 1 | 772326 | 100.00  |            |            |             |         |          |
|                         | 251.1219 |   | 30312  | 3.92    |            |            |             |         |          |
|                         | 252.0895 | 1 | 104483 | 13.53   |            |            |             |         |          |
|                         | 253.0841 | 1 | 25326  | 3.28    |            |            |             |         |          |

Fig. S156. HRMS spectrum of compound 2f

# (Compound 3f)

## Peak Spec

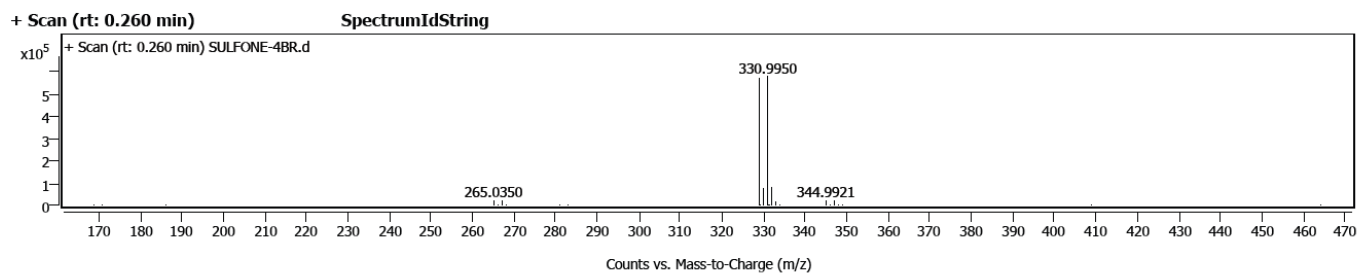

| SpectrumIdString | m/z      | Z | Abund  | Abund % | m/z (Calc) | Diff (ppm) | Ion Species | Formula | Ion Type |
|------------------|----------|---|--------|---------|------------|------------|-------------|---------|----------|
|                  | 265.0350 |   | 21801  | 3.77    |            |            |             |         |          |
|                  | 267.0332 |   | 21123  | 3.66    |            |            |             |         |          |
|                  | 328.9971 | 1 | 570031 | 98.65   |            |            |             |         |          |
|                  | 329.0371 |   | 23236  | 4.02    |            |            |             |         |          |
|                  | 330.0002 | 1 | 78078  | 13.51   |            |            |             |         |          |
|                  | 330.9950 | 1 | 577803 | 100.00  |            |            |             |         |          |
|                  | 331.0350 |   | 23275  | 4.03    |            |            |             |         |          |
|                  | 331.9980 | 1 | 78302  | 13.55   |            |            |             |         |          |
|                  | 344.9921 |   | 21581  | 3.73    |            |            |             |         |          |
|                  | 346.9901 |   | 21508  | 3.72    |            |            |             |         |          |

Fig. S157. HRMS spectrum of compound 3f

# (Compound 4f)

## Peak Spec

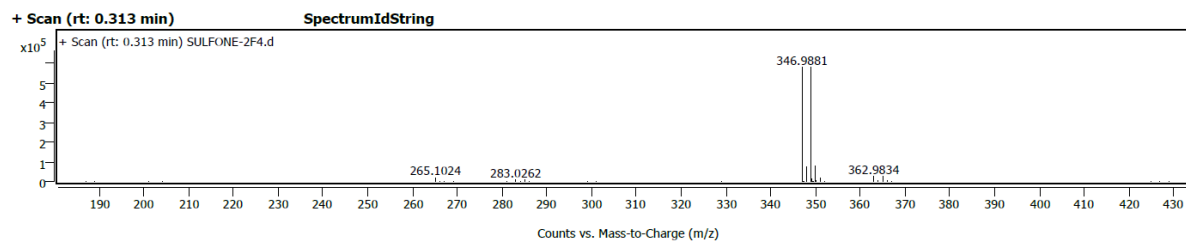

| SpectrumIdString | m/z      | Z | Abund  | Abund % | m/z (Calc) | Diff (ppm) | Ion Species | Formula | Ion Type |
|------------------|----------|---|--------|---------|------------|------------|-------------|---------|----------|
|                  | 265.1024 |   | 17551  | 3.03    |            |            |             |         |          |
|                  | 283.0262 |   | 6920   | 1.20    |            |            |             |         |          |
|                  | 285.0243 |   | 6208   | 1.07    |            |            |             |         |          |
|                  | 346.9881 | 1 | 578785 | 100.00  |            |            |             |         |          |
|                  | 347.0288 |   | 22032  | 3.81    |            |            |             |         |          |
|                  | 347.9913 | 1 | 74275  | 12.83   |            |            |             |         |          |
|                  | 348.9861 | 1 | 578342 | 99.92   |            |            |             |         |          |
|                  | 349.0270 |   | 23468  | 4.05    |            |            |             |         |          |
|                  | 349.0828 |   | 13965  | 2.41    |            |            |             |         |          |
|                  | 349.9892 | 1 | 78526  | 13.57   |            |            |             |         |          |
|                  | 350.9845 | 1 | 17890  | 3.09    |            |            |             |         |          |
|                  | 362.9834 |   | 24649  | 4.26    |            |            |             |         |          |
|                  | 364.9812 |   | 24012  | 4.15    |            |            |             |         |          |

Fig. S158. HRMS spectrum of compound 4f

# (Compound 5f)

## Peak Spec

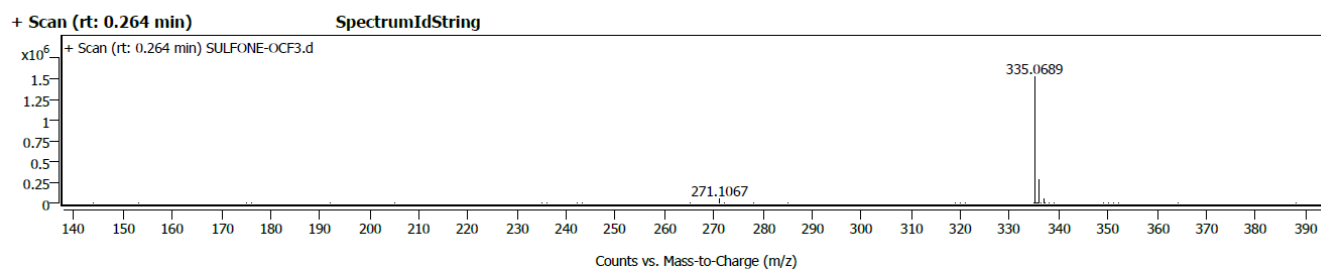

| SpectrumIdString | m/z      | Z | Abund   | Abund % | m/z (Calc) | Diff (ppm) | Ion Species | Formula | Ion Type |
|------------------|----------|---|---------|---------|------------|------------|-------------|---------|----------|
|                  | 271.1067 |   | 54925   | 3.60    |            |            |             |         |          |
|                  | 335.0689 | 1 | 1526019 | 100.00  |            |            |             |         |          |
|                  | 335.0913 |   | 70300   | 4.61    |            |            |             |         |          |
|                  | 335.1101 |   | 67737   | 4.44    |            |            |             |         |          |
|                  | 335.1635 |   | 43074   | 2.82    |            |            |             |         |          |
|                  | 336.0718 | 1 | 281132  | 18.42   |            |            |             |         |          |
|                  | 337.0675 | 1 | 56532   | 3.70    |            |            |             |         |          |

Fig. S159. HRMS spectrum of compound 5f

# (Compound 6f)

## User Spectra

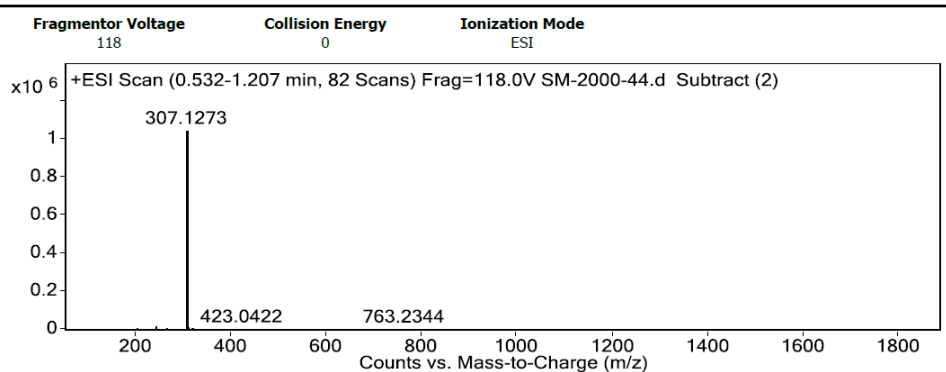

### Peak List

| m/z      | z | Abund      |
|----------|---|------------|
| 203.0186 | 1 | 3802.13    |
| 243.1541 | 1 | 21019.6    |
| 244.1574 | 1 | 3665.28    |
| 265.0715 | 1 | 3292.87    |
| 307.1273 | 1 | 1045648.25 |
| 307.273  |   | 53974.18   |
| 308.1291 | 1 | 218458.7   |
| 309.1252 | 1 | 65153.61   |
| 310.1256 | 1 | 9611.72    |
| 319.0549 | 1 | 8144.65    |

## Compounds

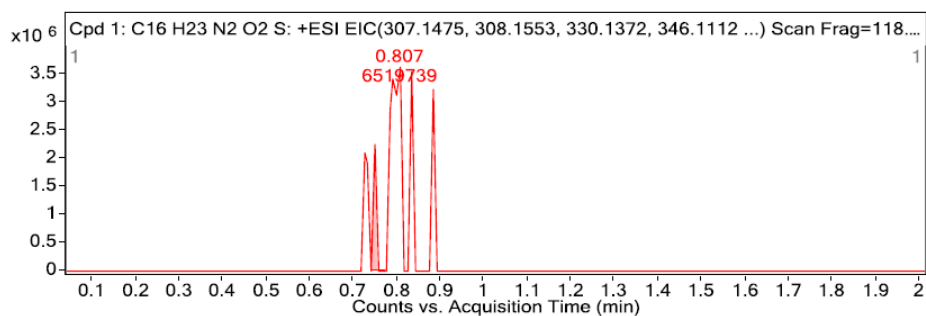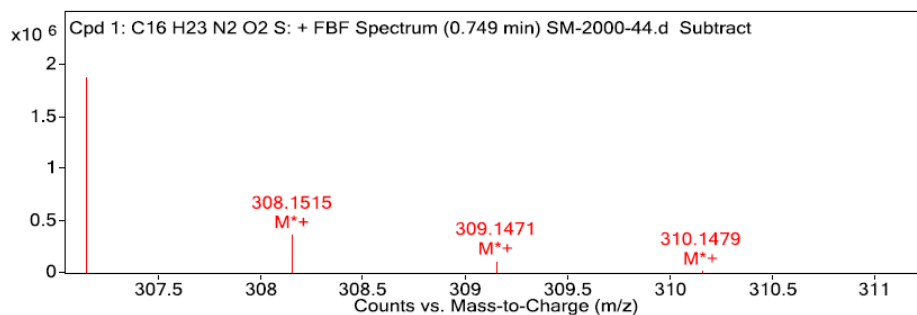

### Peak List

| m/z      | z | Abund      | Formula                                                         | Ion |
|----------|---|------------|-----------------------------------------------------------------|-----|
| 307.1496 | 1 | 1882525.63 | C <sub>16</sub> H <sub>23</sub> N <sub>2</sub> O <sub>2</sub> S | M*+ |
| 308.1515 | 1 | 368326.19  | C <sub>16</sub> H <sub>23</sub> N <sub>2</sub> O <sub>2</sub> S | M*+ |
| 309.1471 | 1 | 115604.96  | C <sub>16</sub> H <sub>23</sub> N <sub>2</sub> O <sub>2</sub> S | M*+ |
| 310.1479 | 1 | 18221.96   | C <sub>16</sub> H <sub>23</sub> N <sub>2</sub> O <sub>2</sub> S | M*+ |
| 311.1446 | 1 | 2374.77    | C <sub>16</sub> H <sub>23</sub> N <sub>2</sub> O <sub>2</sub> S | M*+ |

Fig. S160. HRMS spectrum of compound 6f

# (Compound 7f)

## User Spectra

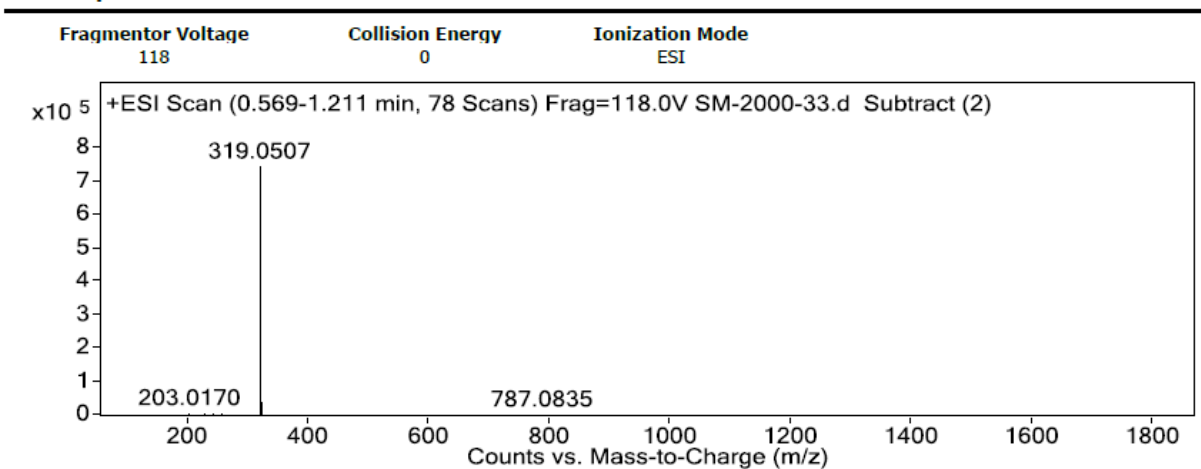

### Peak List

| m/z      | z | Abund    |
|----------|---|----------|
| 203.017  | 1 | 4324.97  |
| 225.0069 | 1 | 2400.84  |
| 242.2499 | 1 | 2750.08  |
| 255.0785 | 1 | 3737.81  |
| 287.0538 |   | 2151.81  |
| 319.0507 | 1 | 743757.5 |

Fig. S161. HRMS spectrum of compound 7f

# (Compound 8f)

## Peak Spec

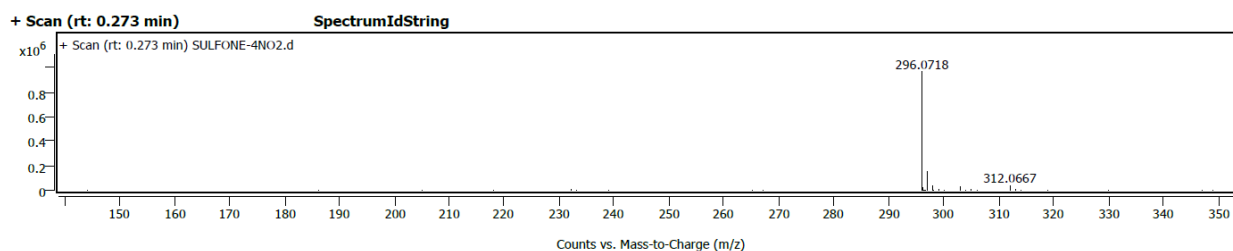

| SpectrumIdString | m/z      | Z | Abund  | Abund % | m/z (Calc) | Diff (ppm) | Ion Species | Formula | Ion Type |
|------------------|----------|---|--------|---------|------------|------------|-------------|---------|----------|
|                  | 296.0718 | 1 | 964905 | 100.00  |            |            |             |         |          |
|                  | 296.1106 |   | 40975  | 4.25    |            |            |             |         |          |
|                  | 296.1610 |   | 22353  | 2.32    |            |            |             |         |          |
|                  | 297.0749 | 1 | 153702 | 15.93   |            |            |             |         |          |
|                  | 298.0705 | 1 | 34171  | 3.54    |            |            |             |         |          |
|                  | 303.0385 |   | 26652  | 2.76    |            |            |             |         |          |
|                  | 312.0667 |   | 36808  | 3.81    |            |            |             |         |          |

Fig. S162. HRMS spectrum of compound 8f

## X-ray Crystallography

On Hampton cryoloops, crystals were mounted. A HyPix3000 (CCD plate) detector with increasing  $\omega$  (width of 0.3\_ per frame) and a microfocus sealed X-ray tube Mo-K $\alpha$  ( $\lambda = 0.71073 \text{ \AA}$ ) X-ray source was used with a SuperNova (Mo) X-ray diffractometer to collect all geometric and intensity data for the crystals at either 5 or 10 s/frame scan speed. CrysAlisPro software was used for both the data acquisition and extraction. Olex2<sup>1</sup> was used to solve the structure using the SIR2004<sup>2</sup> structure solution program utilizing direct methods. The ShelXL6<sup>3</sup> refinement package then used least squares minimization to refine the structure. Anisotropic thermal parameters were used in the refinement of all nonhydrogen atoms. All the H-atoms were added with calculated positions. Details of crystallographic data and structural refinement parameters are summarized in Table S2, S4 and S6 for the compounds **1d**, **1e** and **1f** and geometrical parameters for are listed in Table S3, S5 and S7 for the compounds **1d**, **1e** and **1f**. CCDC number for **1d**, **1e** and **1f** is respectively 2339882, 2335137 and 2339878.

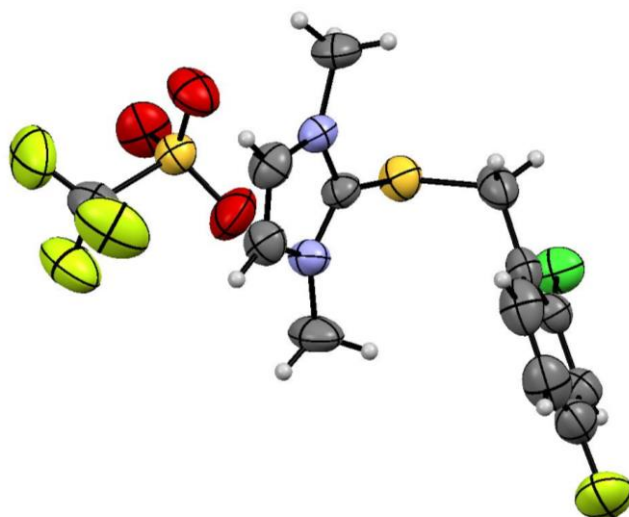

Fig. S163. ORTEP diagram for **1d** at 50% probability.



**Table S2. List of crystallographic parameters for the crystal structure 1d.**

|                                         |                                                                                               |
|-----------------------------------------|-----------------------------------------------------------------------------------------------|
| <b>CCDC number</b>                      | <b>2332405</b>                                                                                |
| <b>Identification code</b>              | Ex-JMSO2A2_auto                                                                               |
| <b>Empirical formula</b>                | C <sub>13</sub> H <sub>13</sub> ClF <sub>4</sub> N <sub>2</sub> O <sub>3</sub> S <sub>2</sub> |
| <b>Formula weight</b>                   | 420.82                                                                                        |
| <b>Temperature/K</b>                    | 293(2)                                                                                        |
| <b>Crystal system</b>                   | triclinic                                                                                     |
| <b>Space group</b>                      | P-1                                                                                           |
| <b>a/Å</b>                              | 7.7328(7)                                                                                     |
| <b>b/Å</b>                              | 7.9098(6)                                                                                     |
| <b>c/Å</b>                              | 15.8738(9)                                                                                    |
| <b>α/°</b>                              | 82.544(6)                                                                                     |
| <b>β/°</b>                              | 81.102(6)                                                                                     |
| <b>γ/°</b>                              | 67.567(9)                                                                                     |
| <b>Volume/Å<sup>3</sup></b>             | 883.98(12)                                                                                    |
| <b>Z</b>                                | 2                                                                                             |
| <b>ρ<sub>calc</sub>/cm<sup>3</sup></b>  | 1.581                                                                                         |
| <b>μ/mm<sup>-1</sup></b>                | 0.507                                                                                         |
| <b>F(000)</b>                           | 428.0                                                                                         |
| <b>Crystal size/mm<sup>3</sup></b>      | 0.008 × 0.005 × 0.004                                                                         |
| <b>Radiation</b>                        | Mo Kα (λ = 0.71073)                                                                           |
| <b>2θ range for data collection/°</b>   | 6.348 to 54.19                                                                                |
| <b>Index ranges</b>                     | -9 ≤ h ≤ 9, -9 ≤ k ≤ 10, -19 ≤ l ≤ 17                                                         |
| <b>Reflections collected</b>            | 10987                                                                                         |
| <b>Independent reflections</b>          | 3596 [R <sub>int</sub> = 0.0355, R <sub>sigma</sub> = 0.0476]                                 |
| <b>Data/restraints/parameters</b>       | 3596/0/228                                                                                    |
| <b>Goodness-of-fit on F<sup>2</sup></b> | 1.083                                                                                         |
| <b>Final R indexes [I ≥ 2σ (I)]</b>     | R <sub>1</sub> = 0.0482, wR <sub>2</sub> = 0.1094                                             |
| <b>Final R indexes [all data]</b>       | R <sub>1</sub> = 0.0780, wR <sub>2</sub> = 0.1258                                             |

**Table S3. Geometrical parameters of 1d.**

| <b>Bond</b>       | <b>Length</b> | <b>Bond</b>       | <b>Length</b> |
|-------------------|---------------|-------------------|---------------|
| S2 O1             | 1.427(2)      | N2 C2             | 1.364(3)      |
| S2 O2             | 1.421(2)      | N2 C4             | 1.467(3)      |
| S2 O3             | 1.418(2)      | F2 C13            | 1.313(4)      |
| S2 C13            | 1.815(3)      | F3 C13            | 1.316(4)      |
| S1 C1             | 1.733(3)      | C8 C7             | 1.386(4)      |
| S1 C6             | 1.844(3)      | C8 C9             | 1.379(4)      |
| C11 C8            | 1.733(3)      | C7 C6             | 1.492(4)      |
| F1 C10            | 1.362(4)      | C7 C12            | 1.383(4)      |
| F4 C13            | 1.321(3)      | C3 C2             | 1.343(4)      |
| N1 C1             | 1.340(3)      | C9 C10            | 1.364(4)      |
| N1 C3             | 1.367(3)      | C10 C11           | 1.352(5)      |
| N1 C5             | 1.455(3)      | C12 C11           | 1.376(5)      |
| N2 C1             | 1.335(3)      |                   |               |
| <b>Bond Angle</b> | <b>Angle</b>  | <b>Bond Angle</b> | <b>Angle</b>  |
| O1 S2 C13         | 103.52(14)    | C8 C7 C6          | 122.1(3)      |
| O2 S2 O1          | 115.10(15)    | C12 C7 C8         | 116.4(3)      |
| O2 S2 C13         | 102.70(16)    | C12 C7 C6         | 121.5(3)      |
| O3 S2 O1          | 115.54(16)    | C2 C3 N1          | 107.2(3)      |
| O3 S2 O2          | 114.55(15)    | C10 C9 C8         | 116.8(3)      |
| O3 S2 C13         | 102.90(17)    | C3 C2 N2          | 107.6(3)      |
| C1 S1 C6          | 99.69(13)     | F1 C10 C9         | 117.5(3)      |
| C1 N1 C3          | 108.7(2)      | C11 C10 F1        | 119.3(3)      |
| C1 N1 C5          | 126.0(2)      | C11 C10 C9        | 123.2(3)      |
| C3 N1 C5          | 125.2(2)      | C7 C6 S1          | 113.2(2)      |
| C1 N2 C2          | 108.8(2)      | C11 C12 C7        | 121.8(3)      |
| C1 N2 C4          | 125.7(2)      | F4 C13 S2         | 111.9(2)      |
| C2 N2 C4          | 125.3(2)      | F2 C13 S2         | 111.8(2)      |
| N1 C1 S1          | 125.6(2)      | F2 C13 F4         | 107.0(3)      |
| N2 C1 S1          | 126.6(2)      | F2 C13 F3         | 106.5(3)      |
| N2 C1 N1          | 107.7(2)      | F3 C13 S2         | 111.1(3)      |
| C7 C8 C11         | 118.9(2)      | F3 C13 F4         | 108.4(3)      |
| C9 C8 C11         | 117.9(2)      | C10 C11 C12       | 118.6(3)      |
| C9 C8 C7          | 123.2(3)      |                   |               |

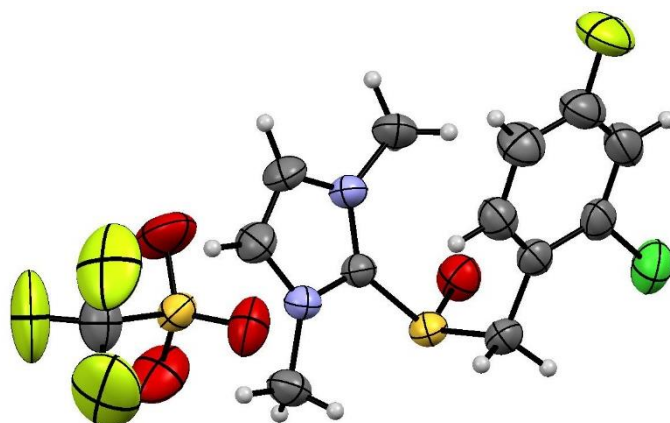

Fig. S164. ORTEP diagram for **1e** (2335137) at 50% probability.

**Table S4.** List of crystallographic parameters for the crystal structure **1e**.

| Identification code                | Ex-NipJmSO2Cl4F_autored                                                                       |
|------------------------------------|-----------------------------------------------------------------------------------------------|
| Empirical formula                  | C <sub>13</sub> H <sub>13</sub> ClF <sub>4</sub> N <sub>2</sub> O <sub>4</sub> S <sub>2</sub> |
| Formula weight                     | 436.82                                                                                        |
| Temperature/K                      | 293(2)                                                                                        |
| Crystal system                     | monoclinic                                                                                    |
| Space group                        | P2 <sub>1</sub> /n                                                                            |
| a/Å                                | 6.1258(3)                                                                                     |
| b/Å                                | 25.4289(9)                                                                                    |
| c/Å                                | 11.3897(4)                                                                                    |
| α/°                                | 90                                                                                            |
| β/°                                | 93.209(4)                                                                                     |
| γ/°                                | 90                                                                                            |
| Volume/Å <sup>3</sup>              | 1771.42(12)                                                                                   |
| Z                                  | 4                                                                                             |
| ρ <sub>calc</sub> /cm <sup>3</sup> | 1.638                                                                                         |
| μ/mm <sup>-1</sup>                 | 0.514                                                                                         |
| F(000)                             | 888.0                                                                                         |
| Crystal size/mm <sup>3</sup>       | 0.011 × 0.01 × 0.008                                                                          |
| Radiation                          | Mo Kα (λ = 0.71073)                                                                           |
| 2θ range for data collection/°     | 6.408 to 54.13                                                                                |
| Index ranges                       | -7 ≤ h ≤ 6, -32 ≤ k ≤ 31, -14 ≤ l ≤ 14                                                        |
| Reflections collected              | 16277                                                                                         |
| Independent reflections            | 3565 [R <sub>int</sub> = 0.0562, R <sub>sigma</sub> = 0.0393]                                 |
| Data/restraints/parameters         | 3565/0/237                                                                                    |
| Goodness-of-fit on F <sup>2</sup>  | 1.063                                                                                         |
| Final R indexes [I ≥ 2σ (I)]       | R <sub>1</sub> = 0.0576, wR <sub>2</sub> = 0.1622                                             |
| Final R indexes [all data]         | R <sub>1</sub> = 0.0749, wR <sub>2</sub> = 0.1749                                             |

**Table S5. Geometrical parameters of 1e.**

| <b>Bond</b>  | <b>Length</b>     | <b>Bond</b>  | <b>Length</b>     |
|--------------|-------------------|--------------|-------------------|
| S1 O1        | 1.474(3)          | N2 C5        | 1.467(4)          |
| S1 C1        | 1.790(3)          | F1 C10       | 1.369(4)          |
| S1 C6        | 1.831(3)          | C7 C6        | 1.502(4)          |
| S2 O2        | 1.417(3)          | C7 C8        | 1.390(5)          |
| S2 O4        | 1.427(3)          | C7 C12       | 1.381(4)          |
| S2 O3        | 1.396(3)          | C8 C9        | 1.370(5)          |
| S2 C13       | 1.797(4)          | F4 C13       | 1.275(5)          |
| C11 C12      | 1.739(4)          | C12 C11      | 1.383(5)          |
| N1 C1        | 1.336(3)          | C3 C2        | 1.349(5)          |
| N1 C4        | 1.467(4)          | F2 C13       | 1.322(5)          |
| N1 C3        | 1.367(4)          | F3 C13       | 1.300(5)          |
| N2 C1        | 1.336(4)          | C11 C10      | 1.360(6)          |
| N2 C2        | 1.374(4)          | C9 C10       | 1.365(6)          |
| <b>Angle</b> | <b>Bond angle</b> | <b>Angle</b> | <b>Bond angle</b> |
| O1 S1 C1     | 106.69(14)        | C12 C7 C8    | 117.5(3)          |
| O1 S1 C6     | 109.00(15)        | C7 C6 S1     | 113.6(2)          |
| C1 S1 C6     | 96.88(15)         | C9 C8 C7     | 121.6(3)          |
| O2 S2 O4     | 111.94(18)        | C7 C12 C11   | 120.2(3)          |
| O2 S2 C13    | 104.87(19)        | C7 C12 C11   | 122.3(3)          |
| O4 S2 C13    | 103.0(2)          | C11 C12 C11  | 117.5(3)          |
| O3 S2 O2     | 117.4(2)          | C2 C3 N1     | 107.8(3)          |
| O3 S2 O4     | 113.8(2)          | C3 C2 N2     | 106.9(3)          |
| O3 S2 C13    | 104.0(2)          | C10 C11 C12  | 116.9(3)          |
| C1 N1 C4     | 128.3(3)          | C10 C9 C8    | 117.8(4)          |
| C1 N1 C3     | 108.4(3)          | C11 C10 F1   | 117.8(4)          |
| C3 N1 C4     | 123.3(3)          | C11 C10 C9   | 123.8(3)          |
| C1 N2 C2     | 108.7(2)          | C9 C10 F1    | 118.3(4)          |
| C1 N2 C5     | 126.3(3)          | F4 C13 S2    | 113.6(3)          |
| C2 N2 C5     | 124.9(3)          | F4 C13 F2    | 108.1(4)          |
| N1 C1 S1     | 128.7(2)          | F4 C13 F3    | 108.7(4)          |
| N2 C1 S1     | 122.9(2)          | F2 C13 S2    | 109.7(3)          |
| N2 C1 N1     | 108.3(3)          | F3 C13 S2    | 111.5(3)          |
| C8 C7 C6     | 119.6(3)          | F3 C13 F2    | 104.7(4)          |
| C12 C7 C6    | 122.8(3)          |              |                   |

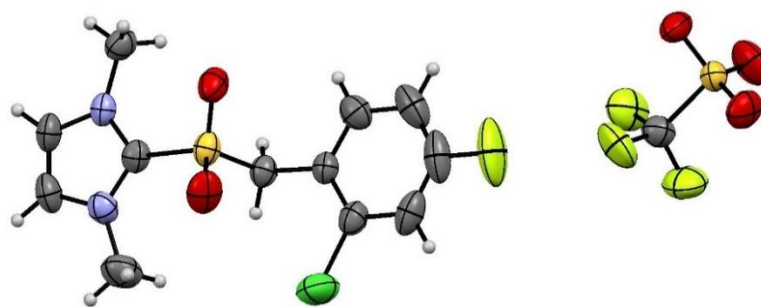

Fig. S165. ORTEP diagram for **1f** (2339878) at 50% probability.

Table S6. List of crystallographic parameters for the crystal structure **1f**.

|                                         |                                                                                                               |
|-----------------------------------------|---------------------------------------------------------------------------------------------------------------|
| <b>CCDC number</b>                      | <b>2339878</b>                                                                                                |
| <b>Identification code</b>              | Ex-JMSO2                                                                                                      |
| <b>Empirical formula</b>                | C <sub>52</sub> H <sub>52</sub> Cl <sub>4</sub> F <sub>16</sub> N <sub>8</sub> O <sub>20</sub> S <sub>8</sub> |
| <b>Formula weight</b>                   | 1811.29                                                                                                       |
| <b>Temperature/K</b>                    | 293(2)                                                                                                        |
| <b>Crystal system</b>                   | Monoclinic                                                                                                    |
| <b>Space group</b>                      | P2 <sub>1</sub> /n                                                                                            |
| <b>a/Å</b>                              | 7.7355(4)                                                                                                     |
| <b>b/Å</b>                              | 10.8997(5)                                                                                                    |
| <b>c/Å</b>                              | 21.2900(10)                                                                                                   |
| <b>α/°</b>                              | 90                                                                                                            |
| <b>β/°</b>                              | 92.262(4)                                                                                                     |
| <b>γ/°</b>                              | 90                                                                                                            |
| <b>Volume/Å<sup>3</sup></b>             | 1793.66(12)                                                                                                   |
| <b>Z</b>                                | 1                                                                                                             |
| <b>ρ<sub>calc</sub>/cm<sup>3</sup></b>  | 1.677                                                                                                         |
| <b>μ/mm<sup>-1</sup></b>                | 0.515                                                                                                         |
| <b>F(000)</b>                           | 920.0                                                                                                         |
| <b>Crystal size/mm<sup>3</sup></b>      | 0.011 × 0.008 × 0.006                                                                                         |
| <b>Radiation</b>                        | Mo Kα (λ = 0.71073)                                                                                           |
| <b>2θ range for data collection/°</b>   | 6.462 to 54.248                                                                                               |
| <b>Index ranges</b>                     | -9 ≤ h ≤ 9, -13 ≤ k ≤ 13, -27 ≤ l ≤ 26                                                                        |
| <b>Reflections collected</b>            | 17191                                                                                                         |
| <b>Independent reflections</b>          | 3648 [R <sub>int</sub> = 0.0597, R <sub>sigma</sub> = 0.0607]                                                 |
| <b>Data/restraints/parameters</b>       | 3648/0/246                                                                                                    |
| <b>Goodness-of-fit on F<sup>2</sup></b> | 1.057                                                                                                         |
| <b>Final R indexes [I ≥ 2σ (I)]</b>     | R <sub>1</sub> = 0.0505, wR <sub>2</sub> = 0.1094                                                             |
| <b>Final R indexes [all data]</b>       | R <sub>1</sub> = 0.0903, wR <sub>2</sub> = 0.1256                                                             |

**Table S7. Geometrical parameters of 1f.**

| <b>Bond</b>  | <b>Bond length</b> | <b>Bond</b>  | <b>Bond length</b> |
|--------------|--------------------|--------------|--------------------|
| S2 O3        | 1.429(2)           | N2 C2        | 1.362(4)           |
| S2 O5        | 1.432(2)           | N1 C1        | 1.338(4)           |
| S2 O4        | 1.423(2)           | N1 C3        | 1.365(4)           |
| S2 C13       | 1.812(3)           | N1 C5        | 1.478(4)           |
| S1 O2        | 1.424(2)           | F1 C10       | 1.350(4)           |
| S1 O1        | 1.423(2)           | C7 C6        | 1.496(4)           |
| S1 C1        | 1.782(3)           | C7 C8        | 1.387(4)           |
| S1 C6        | 1.772(3)           | C7 C12       | 1.380(4)           |
| C11 C8       | 1.725(3)           | C3 C2        | 1.334(4)           |
| F2 C13       | 1.315(3)           | C8 C9        | 1.392(5)           |
| F4 C13       | 1.312(4)           | C12 C11      | 1.380(5)           |
| F3 C13       | 1.316(4)           | C9 C10       | 1.357(5)           |
| N2 C1        | 1.346(4)           | C10 C11      | 1.351(5)           |
| N2 C4        | 1.470(4)           |              |                    |
| <b>Angle</b> | <b>Bond angle</b>  | <b>Angle</b> | <b>Bond angle</b>  |
| O3 S2 O5     | 113.71(15)         | N2 C1 S1     | 125.4(2)           |
| O3 S2 C13    | 103.34(15)         | N1 C1 S1     | 126.4(2)           |
| O5 S2 C13    | 103.03(14)         | N1 C1 N2     | 107.9(3)           |
| O4 S2 O3     | 115.82(16)         | C7 C6 S1     | 108.47(19)         |
| O4 S2 O5     | 115.02(17)         | F2 C13 S2    | 111.7(2)           |
| O4 S2 C13    | 103.62(16)         | F2 C13 F3    | 106.4(3)           |
| O2 S1 C1     | 105.89(13)         | F4 C13 S2    | 112.0(2)           |
| O2 S1 C6     | 109.42(14)         | F4 C13 F2    | 107.3(3)           |
| O1 S1 O2     | 119.60(14)         | F4 C13 F3    | 108.2(3)           |
| O1 S1 C1     | 106.31(14)         | F3 C13 S2    | 111.0(2)           |
| O1 S1 C6     | 110.21(14)         | C2 C3 N1     | 108.2(3)           |
| C6 S1 C1     | 104.18(13)         | C3 C2 N2     | 107.6(3)           |
| C1 N2 C4     | 128.4(2)           | C7 C8 C11    | 120.6(2)           |
| C1 N2 C2     | 108.3(3)           | C7 C8 C9     | 121.4(3)           |
| C2 N2 C4     | 123.3(3)           | C9 C8 C11    | 118.0(3)           |
| C1 N1 C3     | 108.0(3)           | C11 C12 C7   | 121.3(3)           |
| C1 N1 C5     | 127.5(3)           | C10 C9 C8    | 117.8(3)           |
| C3 N1 C5     | 124.3(3)           | F1 C10 C9    | 117.1(4)           |
| C8 C7 C6     | 123.0(3)           | F1 C10 C11   | 119.8(4)           |
| C12 C7 C6    | 119.2(3)           | C11 C10 C9   | 123.1(4)           |
| C12 C7 C8    | 117.7(3)           | C10 C11 C12  | 118.7(3)           |

## References

1. O. V. Dolomanov, L. J. Bourhis, R. J. Gildea, J. A. Howard, H. Puschmann, *J. Appl. Crystallogr.*, 2009, 42, 339-341.
2. M. C. Burla, R. Caliandro, M. Camalli, B. Carrozzini, G. L. Cascarano, L. De Caro, C. Giacovazzo, G. Polidori, D. Siliqi and R. Spagna, *J. Appl. Crystallogr.*, 2007, 40, 609-613.
3. G. M. Sheldrick, *Acta Crystallogr. Sect. C: Struct. Chem.*, 2015, 71, 3-8.

## 4. Computational Details

**Table S8.** The geometrical data comparison between experimental and quantum chemical study.

| Methodology               | C <sub>1</sub> →S Bond Length (Å) |       |       |
|---------------------------|-----------------------------------|-------|-------|
|                           | 1d                                | 1e    | 1f    |
| Experimental              | 1.732                             | 1.790 | 1.782 |
| M06-2x/6-311+G (2d,p)     | 1.743                             | 1.821 | 1.809 |
| M06-2x/def2tzvpp          | 1.738                             | 1.812 | 1.803 |
| B3LYP/6-311+G (2d,p)      | 1.747                             | 1.844 | 1.853 |
| M06-2x/6-311+G (2d,p)/SDD | 1.759                             | 1.933 | 2.011 |
| B3LYP/6-311+G (2d,p)/SDD  | 1.763                             | 2.015 | 2.153 |
| MPW1PW91/6-311+G (2d,p)   | 1.736                             | 1.820 | 1.810 |
| CAM-B3LYP/6-311+G (2d,p)  | 1.744                             | 1.827 | 1.814 |
| HF/6-311+G (2d,p)         | 1.757                             | 1.814 | 1.808 |

**Table S9.** List of absolute Gibbs free energy values of all optimized geometries associated with Table 1 of the main manuscript obtained at MPW1PW91/6-311++G(2d,p) level of quantum chemical level

| Str.                             | E (a.u.)     |
|----------------------------------|--------------|
| 1a                               | -1492.870411 |
| 1b                               | -1568.053685 |
| 1c                               | -1643.279358 |
| 1d                               | -1532.529003 |
| 1e                               | -1607.697595 |
| 1f                               | -1682.919423 |
| 1,3-dimethyl-imidazole-2-ylidene | -304.711360  |
| frag-1 (1a, 1b and 1c)           | -264.846013  |
| frag-2 (1a and 1d)               | -1227.683953 |
| frag-2 (1b and 1e)               | -1302.888703 |
| frag-2 (1c and 1f)               | -1378.092772 |



**Table S10. List of absolute Gibbs free energy values of all optimized geometries associated with Table 1 of the main manuscript obtained at MPW1PW91/ 6-311++G(2d,p) level of quantum chemical chemistry.**

| <b>Str.</b> | <b>E (a.u.)</b> | <b>Str.</b> | <b>E (a.u.)</b> |
|-------------|-----------------|-------------|-----------------|
| <b>1a</b>   | -1492.870411    | <b>1d</b>   | -1532.529003    |
| <b>2a</b>   | -933.969021     | <b>2d</b>   | -973.631687     |
| <b>3a</b>   | -3507.684727    | <b>3d</b>   | -3547.344148    |
| <b>4a</b>   | -3606.941311    | <b>4d</b>   | -3646.602089    |
| <b>5a</b>   | -1346.270926    | <b>5d</b>   | -1385.928898    |
| <b>6a</b>   | -1091.126247    | <b>6d</b>   | -1130.791406    |
| <b>7a</b>   | -1271.051632    | <b>7d</b>   | -1310.709825    |
| <b>8a</b>   | -1138.489577    | <b>8d</b>   | -1178.142522    |
| <b>1b</b>   | -1568.053685    | <b>1e</b>   | -1607.697595    |
| <b>2b</b>   | -1009.153730    | <b>2e</b>   | -1048.803932    |
| <b>3b</b>   | -3582.870088    | <b>3e</b>   | -3622.516492    |
| <b>4b</b>   | -3682.124915    | <b>4e</b>   | -3721.768998    |
| <b>5b</b>   | -1421.456259    | <b>5e</b>   | -1461.101011    |
| <b>6b</b>   | -1166.311318    | <b>6e</b>   | -1205.964001    |
| <b>7b</b>   | -1346.236097    | <b>7e</b>   | -1385.881962    |
| <b>8b</b>   | -1213.674366    | <b>8e</b>   | -1253.313922    |
| <b>1c</b>   | -1643.279358    | <b>1f</b>   | -1682.919423    |
| <b>2c</b>   | -1084.379803    | <b>2f</b>   | -1124.022422    |
| <b>3c</b>   | -3658.095655    | <b>3f</b>   | -3697.734946    |
| <b>4c</b>   | -3757.350755    | <b>4f</b>   | -3796.990704    |
| <b>5c</b>   | -1496.681926    | <b>5f</b>   | -1536.319903    |
| <b>6c</b>   | -1241.537488    | <b>6f</b>   | -1281.182451    |
| <b>7c</b>   | -1421.462460    | <b>7f</b>   | -1461.099396    |
| <b>8c</b>   | -1288.899593    | <b>8f</b>   | -1328.532407    |

**Table S11. Comparison of NMR (Experimental vs. Theoretical)**

| Methodology               | <sup>13</sup> C NMR SHIFT OF (1a) (ppm) | <sup>13</sup> C NMR SHIFT OF (1d) (ppm) | Difference in the <sup>13</sup> C NMR value (ppm) | <sup>13</sup> C NMR (1b) (ppm) | <sup>13</sup> C NMR SHIFT OF (1e) (ppm) | Difference in the <sup>13</sup> C NMR value (ppm) | <sup>13</sup> C NMR SHIFT OF (1c) (ppm) | <sup>13</sup> C NMR SHIFT OF (1f) (ppm) | Difference in the <sup>13</sup> C NMR value (ppm) |
|---------------------------|-----------------------------------------|-----------------------------------------|---------------------------------------------------|--------------------------------|-----------------------------------------|---------------------------------------------------|-----------------------------------------|-----------------------------------------|---------------------------------------------------|
| Experimental              | 139.99                                  | 138.33                                  | -1.66                                             | 145.21                         | 141.80                                  | -3.41                                             | 140.68                                  | 137.66                                  | -3.02                                             |
| M06-2x/6-311+G (2d,p)     | 159.58                                  | 160.19                                  | 0.61                                              | 160.37                         | 162.08                                  | 1.71                                              | 162.66                                  | 157.27                                  | -5.39                                             |
| M06-2x/def2tzvpp          | 161.01                                  | 162.35                                  | 1.34                                              | 161.60                         | 163.29                                  | 1.69                                              | 163.49                                  | 158.40                                  | -5.09                                             |
| B3LYP/6-311+G (2d,p)      | 151.15                                  | 150.81                                  | -0.34                                             | 150.93                         | 152.31                                  | 1.38                                              | 154.18                                  | 150.03                                  | -4.15                                             |
| M06-2x/6-311+G (2d,p)/SDD | 146.38                                  | 155.40                                  | 9.02                                              | 135.57                         | 156.82                                  | 21.25                                             | 142.28                                  | 156.04                                  | 13.76                                             |
| B3LYP/6-311+G (2d,p)/SDD  | 139.42                                  | 141.23                                  | 1.81                                              | 129.97                         | 151.00                                  | 21.03                                             | 138.31                                  | 157.29                                  | 18.98                                             |
| MPW1PW91/6-311+G (2d,p)   | 147.56                                  | 146.35                                  | -1.21                                             | 145.38                         | 147.05                                  | 1.67                                              | 149.97                                  | 144.84                                  | -5.13                                             |
| CAM-B3LYP/6-311+G (2d,p)  | 152.93                                  | 152.02                                  | -0.91                                             | 150.45                         | 152.41                                  | 1.96                                              | 154.54                                  | 149.75                                  | -4.79                                             |
| HF/6-311+G (2d,p)         | 153.46                                  | 154.28                                  | 0.82                                              | 150.28                         | 154.49                                  | 4.21                                              | 151.15                                  | 149.22                                  | -1.93                                             |

**Table S12. Second order delocalisation energies ( $E^{(2)}$ ) in **1e** and **1f** at MPW1PW91/ 6-311++G(2d,p) levels**

| Structure                                | $E^{(2)a}$ | $E_1^a - E_1^b$ | $F_{ij}^b$ |
|------------------------------------------|------------|-----------------|------------|
| <b>1e (Sulfoxide)</b>                    |            |                 |            |
| <b>(LP-3 of O)</b>                       |            |                 |            |
| $n_{O} \rightarrow \sigma^*_{C(1)-S}$    | 23.59      | 0.40            | 0.089      |
| $n_{O} \rightarrow \sigma^*_{C(2)-S}$    | 8.00       | 0.41            | 0.052      |
| <b>(LP-2 of O)</b>                       |            |                 |            |
| $n_{O} \rightarrow \sigma^*_{C(1)-S}$    | 3.95       | 0.41            | 0.036      |
| $n_{O} \rightarrow \sigma^*_{C(2)-S}$    | 15.45      | 0.42            | 0.072      |
| <b>1f (Sulfone)</b>                      |            |                 |            |
| <b>(LP-3 of O<sub>1</sub>)</b>           |            |                 |            |
| $n_{O(1)} \rightarrow \sigma^*_{C(1)-S}$ | 19.55      | 0.42            | 0.081      |
| $n_{O(1)} \rightarrow \sigma^*_{O(2)-S}$ | 18.57      | 0.64            | 0.100      |
| <b>(LP-2 of O<sub>1</sub>)</b>           |            |                 |            |
| $n_{O(1)} \rightarrow \sigma^*_{C(1)-S}$ | 7.57       | 0.42            | 0.051      |
| $n_{O(1)} \rightarrow \sigma^*_{O(2)-S}$ | 7.14       | 0.64            | 0.061      |
| $n_{O(1)} \rightarrow \sigma^*_{C(2)-S}$ | 19.57      | 0.45            | 0.084      |
| <b>(LP-3 of O<sub>2</sub>)</b>           |            |                 |            |
| $n_{O(2)} \rightarrow \sigma^*_{C(1)-S}$ | 16.77      | 0.42            | 0.075      |
| $n_{O(2)} \rightarrow \sigma^*_{O(1)-S}$ | 21.23      | 0.63            | 0.106      |
| <b>(LP-2 of O<sub>2</sub>)</b>           |            |                 |            |
| $n_{O(2)} \rightarrow \sigma^*_{C(1)-S}$ | 10.33      | 0.42            | 0.059      |
| $n_{O(2)} \rightarrow \sigma^*_{O(2)-S}$ | 4.87       | 0.63            | 0.050      |
| $n_{O(2)} \rightarrow \sigma^*_{C(2)-S}$ | 20.66      | 0.45            | 0.086      |

# Conformational Search For **1d**

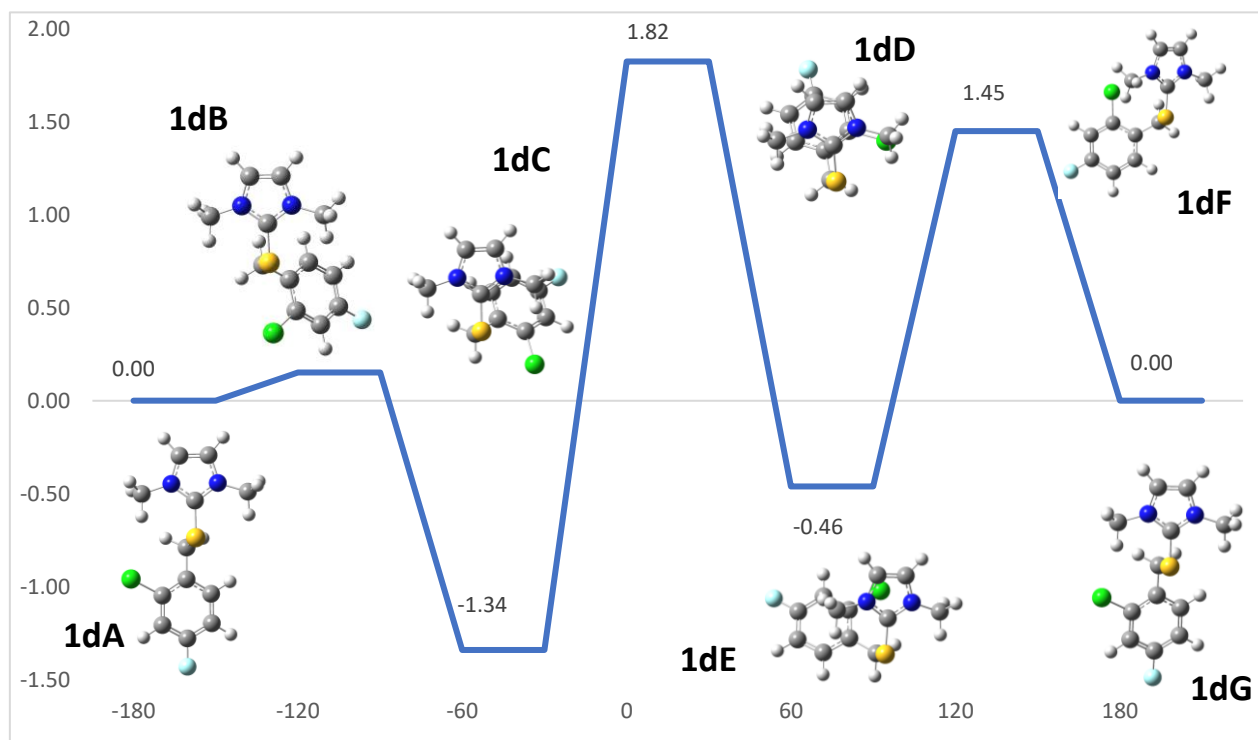

Fig. S166. Conformational analysis of **1d** around S-C<sub>2</sub> bond. Energy differences values are provided in kcal/mol.

**Table S13.** List of absolute energy values of all the conformers of cationic sulfide (**1d**) derivative obtained at MPW1PW91/ 6-311++G(2d,p) level of quantum chemical chemistry.

| Conformer  | Energy (a.u.) |
|------------|---------------|
| <b>1dA</b> | -1532.716156  |
| <b>1dB</b> | -1532.715914  |
| <b>1dC</b> | -1532.718292  |
| <b>1dD</b> | -1532.713248  |
| <b>1dE</b> | -1532.716889  |
| <b>1dF</b> | -1532.713846  |
| <b>1dG</b> | -1532.716156  |

## Conformational Search For **1e**

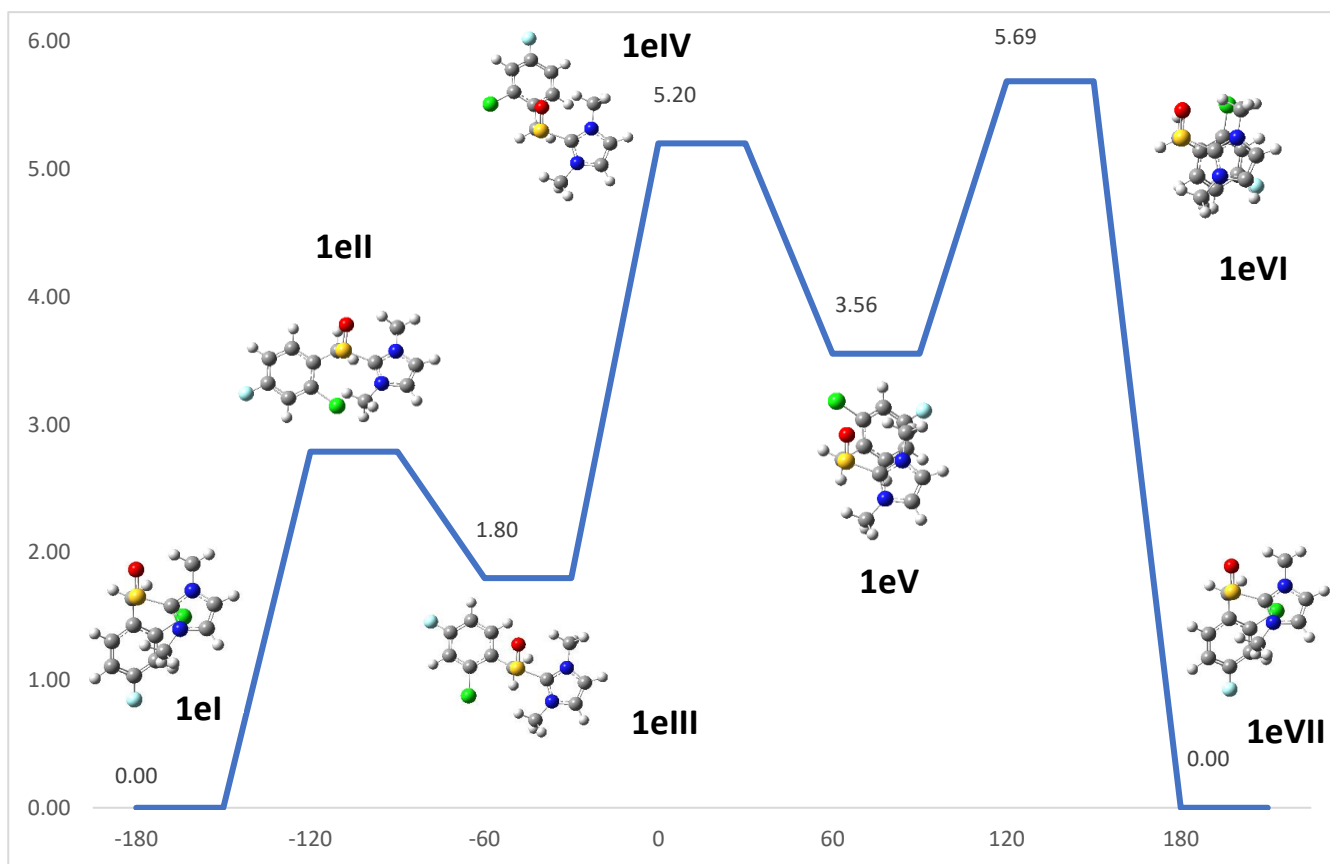

Fig. S167. Conformational analysis of **1e** around S-C<sub>2</sub> bond. Energy differences values are provided in kcal/mol.

**Table S14.** List of absolute energy values of all conformers of cationic sulfoxide (**1e**) derivative obtained at MPW1PW91/6-311++G(2d,p) level of quantum chemical chemistry.

| Conformer    | Energy (a.u.) |
|--------------|---------------|
| <b>1eI</b>   | -1607.893972  |
| <b>1eII</b>  | -1607.889529  |
| <b>1eIII</b> | -1607.891107  |
| <b>1eIV</b>  | -1607.885680  |
| <b>1eV</b>   | -1607.888306  |
| <b>1eVI</b>  | -1607.884904  |
| <b>1eVII</b> | -1607.893972  |

## Conformational Search For **1f**

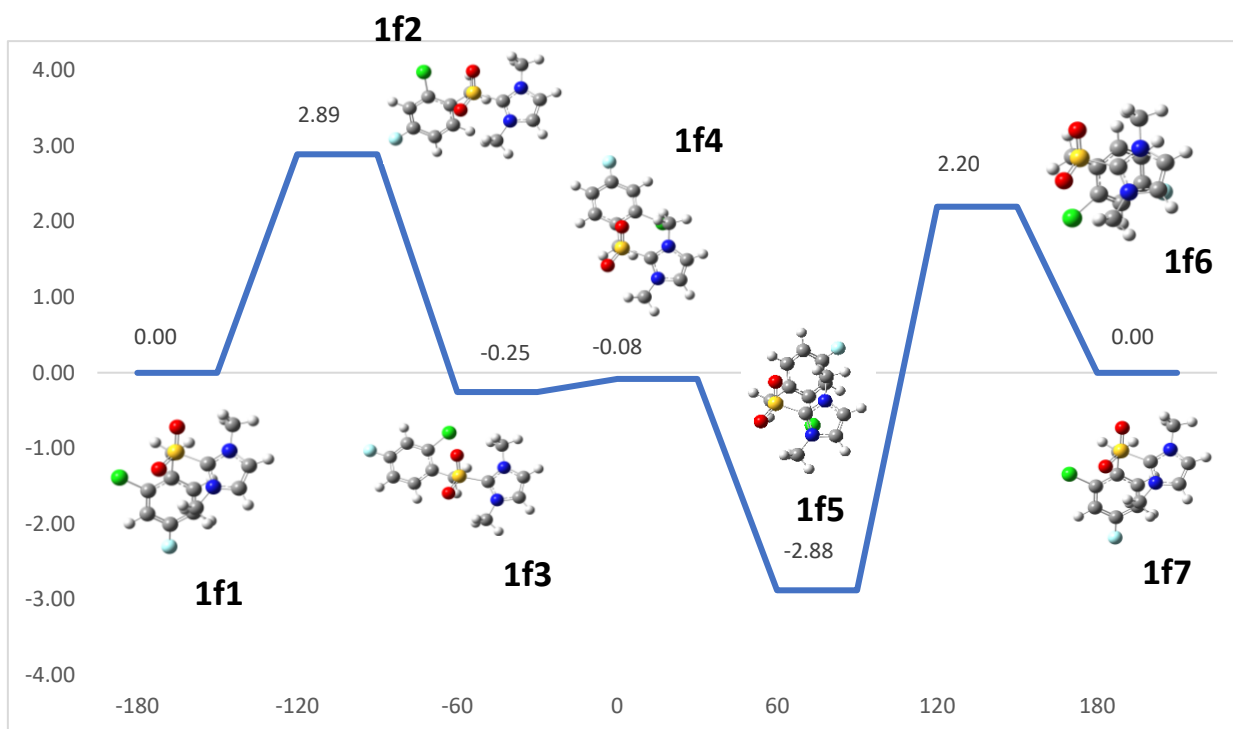

Fig. S168. Conformational analysis of **1f** around S-C<sub>2</sub> bond. Energy differences values are provided in kcal/mol.

**Table S15.** List of absolute energy values of all conformers of cationic sulfone (**1f**) derivative obtained at MPW1PW91/6-311++G(2d,p) level of quantum chemical chemistry.

| Conformer  | Energy (a.u.) |
|------------|---------------|
| <b>1f1</b> | -1683.113673  |
| <b>1f2</b> | -1683.109067  |
| <b>1f3</b> | -1683.114078  |
| <b>1f4</b> | -1683.113803  |
| <b>1f5</b> | -1683.118262  |
| <b>1f6</b> | -1683.110171  |
| <b>1f7</b> | -1683.113673  |

## Cartesian Coordinates of All Optimized Geometries at MPW1PW91/6-311++G(2d,p) level

### 1a

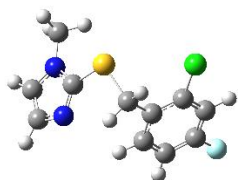

|   |            |            |            |
|---|------------|------------|------------|
| H | 4.12699400 | 1.46167200 | 1.68361300 |
| H | 3.75692200 | 0.08027800 | 2.73621000 |

### 2a

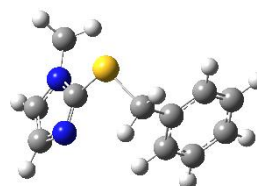

0 1

|    |             |             |             |
|----|-------------|-------------|-------------|
| S  | 1.29592300  | 1.51598300  | -0.29572500 |
| Cl | -2.23617300 | 2.39786100  | 0.14559600  |
| F  | -3.94634300 | -2.23720200 | 1.00580000  |
| N  | 2.31195800  | -0.89276400 | -1.14762200 |
| N  | 3.15141300  | -0.16106300 | 0.76801000  |
| C  | 2.27863300  | 0.06317500  | -0.25026200 |
| C  | -2.11938900 | 0.67099100  | -0.03810300 |
| C  | -1.07353500 | 0.11402900  | -0.77229200 |
| C  | 3.25417000  | -1.77746800 | -0.69596300 |
| H  | 3.48842300  | -2.67762900 | -1.24083200 |
| C  | -3.09343400 | -0.10696600 | 0.56368600  |
| H  | -3.90163700 | 0.33777300  | 1.12651900  |
| C  | 3.79222900  | -1.34217500 | 0.47695700  |
| H  | 4.55078900  | -1.74942000 | 1.12330500  |
| C  | -3.00751500 | -1.47681100 | 0.42494800  |
| C  | -0.02087400 | 0.94250000  | -1.43069900 |
| H  | -0.42949900 | 1.86307300  | -1.84408600 |
| H  | 0.47788600  | 0.38774500  | -2.22226400 |
| C  | -1.03837100 | -1.27489500 | -0.88200700 |
| H  | -0.22399300 | -1.72172800 | -1.43818200 |
| C  | -1.99470900 | -2.08195600 | -0.28931800 |
| H  | -1.96279300 | -3.15953700 | -0.37635800 |
| C  | 3.39153500  | 0.68749700  | 1.91024300  |
| H  | 2.45814200  | 1.16250200  | 2.21051600  |

0 1

|   |             |             |             |
|---|-------------|-------------|-------------|
| S | -0.78176100 | -1.77091200 | -0.24218300 |
| N | -1.78679100 | 0.52705000  | -1.34529100 |
| N | -2.34240500 | 0.22398800  | 0.77865300  |
| C | -1.66269300 | -0.25627100 | -0.29960500 |
| C | 2.61100700  | -0.97653500 | 0.30456500  |
| C | 1.66188200  | -0.43824600 | -0.56161900 |
| C | -2.58023000 | 1.55897000  | -0.93208300 |
| H | -2.84526500 | 2.36736100  | -1.59442400 |
| C | 3.52176300  | -0.15876300 | 0.95284200  |
| H | 4.25767400  | -0.59300700 | 1.61896200  |
| C | -2.94661600 | 1.38602700  | 0.37043100  |
| H | -3.56661800 | 1.96607400  | 1.03258600  |
| C | 3.49446500  | 1.21409000  | 0.74571700  |
| C | 0.67638100  | -1.31923300 | -1.26015700 |
| H | 1.11289900  | -2.28514600 | -1.51688000 |
| H | 0.28767000  | -0.86184700 | -2.16774500 |
| C | 1.64449700  | 0.93847600  | -0.76672600 |
| H | 0.90672000  | 1.36318000  | -1.43677100 |
| C | 2.55437200  | 1.75923600  | -0.11544200 |
| H | 2.52977900  | 2.82900000  | -0.28530400 |

|   |             |             |            |
|---|-------------|-------------|------------|
| C | -2.43507100 | -0.36822600 | 2.09158700 |
| H | -1.54076200 | -0.96060600 | 2.27678300 |
| H | -3.31214800 | -1.01252400 | 2.17570500 |
| H | -2.49865800 | 0.42113000  | 2.83877500 |
| H | 2.63537000  | -2.04801400 | 0.47189500 |
| H | 4.20734300  | 1.85457200  | 1.25075800 |

### 3a

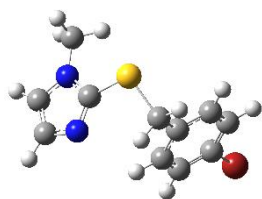

|     |             |             |             |
|-----|-------------|-------------|-------------|
| 0 1 |             |             |             |
| S   | 2.56934400  | 1.59838100  | 0.38626900  |
| N   | 2.96398400  | -0.47107100 | -1.36913800 |
| N   | 3.41641700  | -0.96855100 | 0.74262100  |
| C   | 2.98519400  | -0.02329600 | -0.13629500 |
| C   | -0.94168000 | 1.88399300  | 0.33287800  |
| C   | -0.04452400 | 1.33853500  | -0.58170600 |
| C   | 3.40337000  | -1.76336400 | -1.29081100 |
| H   | 3.48075300  | -2.38669200 | -2.16698700 |
| C   | -2.16257400 | 1.28161800  | 0.58564100  |
| H   | -2.85492100 | 1.71555800  | 1.29419800  |
| C   | 3.70051400  | -2.08775000 | -0.00061600 |
| H   | 4.07737800  | -2.98867200 | 0.45266200  |
| C   | -2.48814600 | 0.11465200  | -0.08575600 |
| C   | 1.27307900  | 1.99270300  | -0.84796000 |
| H   | 1.19791600  | 3.07935700  | -0.79773500 |
| H   | 1.67784900  | 1.71652700  | -1.81941500 |
| C   | -0.39952800 | 0.16819000  | -1.24533400 |
| H   | 0.29217600  | -0.26943400 | -1.95451700 |
| C   | -1.61779000 | -0.44868900 | -1.00113400 |
| H   | -1.88586100 | -1.35815600 | -1.52151300 |
| C   | 3.57551000  | -0.82795800 | 2.17018500  |
| H   | 2.84111800  | -0.11561400 | 2.54307600  |

|    |             |             |            |
|----|-------------|-------------|------------|
| H  | 4.57589500  | -0.47408800 | 2.42604700 |
| H  | 3.40530100  | -1.79170700 | 2.64679000 |
| H  | -0.68494800 | 2.79608200  | 0.86024500 |
| Br | -4.15987200 | -0.71976300 | 0.25279800 |

### 4a

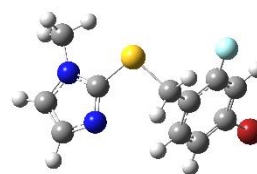

|     |             |             |             |
|-----|-------------|-------------|-------------|
| 0 1 |             |             |             |
| S   | 2.52462500  | 1.49268600  | 0.12934200  |
| N   | 2.92407900  | -0.83447000 | -1.27521500 |
| N   | 3.66069900  | -0.88144600 | 0.81425200  |
| C   | 3.03862200  | -0.16026200 | -0.15619800 |
| C   | -0.98735100 | 1.68065000  | -0.02474100 |
| C   | -0.06046800 | 1.00769700  | -0.80832400 |
| C   | 3.50320700  | -2.04914600 | -1.02391700 |
| H   | 3.54556200  | -2.81943000 | -1.77684200 |
| C   | -2.20784900 | 1.14794800  | 0.33407000  |
| H   | -2.89094200 | 1.72266900  | 0.94299600  |
| C   | 3.97377500  | -2.09685700 | 0.25335900  |
| H   | 4.48779500  | -2.86194000 | 0.80965100  |
| C   | -2.51238700 | -0.12605400 | -0.11294600 |
| C   | 1.24455800  | 1.63265200  | -1.17189600 |
| H   | 1.14583400  | 2.70653100  | -1.32258900 |
| H   | 1.66350600  | 1.18275700  | -2.06917000 |
| C   | -0.41189500 | -0.26828000 | -1.23877000 |
| H   | 0.29625300  | -0.82018100 | -1.84410900 |
| C   | -1.62677500 | -0.84278100 | -0.89824900 |
| H   | -1.88058300 | -1.83564300 | -1.24203300 |
| C   | 3.97005900  | -0.45043600 | 2.15635500  |
| H   | 3.18340700  | 0.21354200  | 2.51291700  |



|    |             |             |            |
|----|-------------|-------------|------------|
| H  | 4.92483300  | 0.07725100  | 2.19496600 |
| H  | 4.01702500  | -1.31983700 | 2.80934700 |
| F  | -0.68960700 | 2.91727500  | 0.40565200 |
| Br | -4.18041800 | -0.89210100 | 0.36110900 |

### 5a

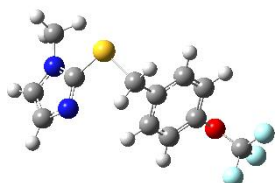

|     |             |             |             |
|-----|-------------|-------------|-------------|
| O 1 |             |             |             |
| S   | 2.88133000  | 1.63287300  | 0.00122700  |
| N   | 3.18644000  | -0.76222300 | -1.30072300 |
| N   | 3.92160200  | -0.75891600 | 0.79000800  |
| C   | 3.32902500  | -0.05005200 | -0.20862900 |
| C   | -0.62153400 | 1.82086700  | 0.21977300  |
| C   | 0.20822900  | 1.11066300  | -0.64460900 |
| C   | 3.71277500  | -1.98872100 | -1.00196500 |
| H   | 3.72239900  | -2.78903900 | -1.72414200 |
| C   | -1.79022000 | 1.26137600  | 0.70614600  |
| H   | -2.43807400 | 1.80679700  | 1.37916500  |
| C   | 4.18322100  | -2.00604800 | 0.27697700  |
| H   | 4.66722100  | -2.76940700 | 0.86190100  |
| C   | -2.12752400 | -0.02211200 | 0.31735300  |
| C   | 1.47160900  | 1.71961100  | -1.16462300 |
| H   | 1.35534300  | 2.78893100  | -1.34321100 |
| H   | 1.80306300  | 1.24672800  | -2.08673900 |
| C   | -0.15596700 | -0.18063100 | -1.01482300 |
| H   | 0.49092700  | -0.74325000 | -1.67599500 |
| C   | -1.32285600 | -0.75404600 | -0.53295800 |
| H   | -1.60925000 | -1.75957100 | -0.81077400 |
| C   | 4.24581100  | -0.29482300 | 2.11757000  |
| H   | 3.51050000  | 0.44635500  | 2.42755000  |
| H   | 5.23974400  | 0.15518100  | 2.15023800  |

|   |             |             |             |
|---|-------------|-------------|-------------|
| H | 4.21184900  | -1.13463900 | 2.80920200  |
| H | -0.34908500 | 2.82581100  | 0.52167000  |
| O | -3.27003800 | -0.61949000 | 0.86120500  |
| C | -4.41858300 | -0.47016600 | 0.18157000  |
| F | -4.36226700 | -0.98655100 | -1.05092000 |
| F | -4.77730200 | 0.81176500  | 0.04672600  |
| F | -5.36996800 | -1.09982000 | 0.85376800  |

### 6a

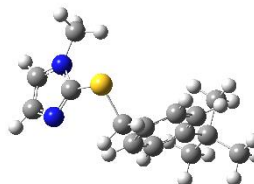

|     |             |             |             |
|-----|-------------|-------------|-------------|
| O 1 |             |             |             |
| S   | 2.59221700  | 1.61107900  | 0.44243500  |
| N   | 3.09927300  | -0.37658500 | -1.37250300 |
| N   | 3.20343100  | -1.03554800 | 0.74094300  |
| C   | 2.97210700  | -0.00501500 | -0.11994100 |
| C   | -0.92637700 | 1.86249200  | 0.40126400  |
| C   | -0.02168700 | 1.38564200  | -0.54505400 |
| C   | 3.42679300  | -1.70110200 | -1.32594200 |
| H   | 3.58674100  | -2.27511000 | -2.22452800 |
| C   | -2.13765600 | 1.23014100  | 0.60727600  |
| H   | -2.81500000 | 1.63737600  | 1.34881300  |
| C   | 3.51075600  | -2.12584400 | -0.03206300 |
| H   | 3.75585400  | -3.07951700 | 0.40362200  |
| C   | -2.50265100 | 0.09187300  | -0.11725200 |
| C   | 1.29043200  | 2.06268100  | -0.77157700 |
| H   | 1.20982800  | 3.14484600  | -0.66079200 |
| H   | 1.70004200  | 1.84476400  | -1.75582500 |
| C   | -0.37545800 | 0.25804100  | -1.27287200 |
| H   | 0.31340300  | -0.13340200 | -2.01210000 |
| C   | -1.59337000 | -0.37627900 | -1.05963900 |

|   |             |             |             |
|---|-------------|-------------|-------------|
| H | -1.82508900 | -1.25153500 | -1.65154500 |
| C | 3.15589200  | -1.00164000 | 2.18302200  |
| H | 2.47753800  | -0.20976300 | 2.49529300  |
| H | 4.14320800  | -0.81244600 | 2.60832700  |
| H | 2.78373700  | -1.95533500 | 2.55398300  |
| H | -0.67749400 | 2.74222900  | 0.98545000  |
| C | -3.85187400 | -0.57653300 | 0.14097400  |
| C | -4.98039800 | 0.42540300  | -0.14176700 |
| H | -5.95298900 | -0.03747200 | 0.04371000  |
| H | -4.90580900 | 1.30932400  | 0.49341900  |
| H | -4.95456300 | 0.75810200  | -1.18137300 |
| C | -4.06918100 | -1.80307200 | -0.74473000 |
| H | -4.05858500 | -1.54494100 | -1.80572000 |
| H | -3.31078000 | -2.56932100 | -0.57080200 |
| H | -5.04233400 | -2.24612000 | -0.52323600 |
| C | -3.92653500 | -1.02458600 | 1.60760000  |
| H | -3.81954700 | -0.18324700 | 2.29394200  |
| H | -4.88978000 | -1.49976600 | 1.80999700  |
| H | -3.13753300 | -1.74421600 | 1.83553400  |

**7a**

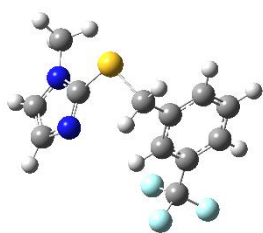

0 1

|   |             |             |             |
|---|-------------|-------------|-------------|
| S | 2.43285100  | 1.55228800  | -0.34482000 |
| N | 1.98956300  | -0.99579600 | -1.25295100 |
| N | 2.98104100  | -0.89550900 | 0.72645800  |
| C | 2.44333600  | -0.20184800 | -0.31292300 |
| C | -0.87041700 | 2.63309900  | 0.24166900  |
| C | -0.35305100 | 1.61982000  | -0.56243300 |
| C | 2.24533200  | -2.26344500 | -0.80849900 |
| H | 1.96339400  | -3.13012100 | -1.38409200 |
| C | -2.04306600 | 2.44527300  | 0.95260400  |

|   |             |             |             |
|---|-------------|-------------|-------------|
| H | -2.43817200 | 3.24472200  | 1.56679800  |
| C | 2.86769700  | -2.22569000 | 0.40338500  |
| H | 3.22960700  | -3.00052500 | 1.05738500  |
| C | -2.71890000 | 1.23658600  | 0.87544700  |
| C | 0.91391900  | 1.82297900  | -1.33115000 |
| H | 1.01101700  | 2.85330900  | -1.67419000 |
| H | 0.98091900  | 1.16045800  | -2.19164200 |
| C | -1.03565300 | 0.41195300  | -0.64154200 |
| H | -0.64162100 | -0.38201200 | -1.26299500 |
| C | -2.21003900 | 0.22550600  | 0.07541700  |
| C | 3.58034300  | -0.35457300 | 1.92269400  |
| H | 3.09974800  | 0.59161100  | 2.16712700  |
| H | 4.65068900  | -0.18613300 | 1.79053400  |
| H | 3.42769300  | -1.04978300 | 2.74626100  |
| H | -0.34784800 | 3.58099800  | 0.30806500  |
| H | -3.63893500 | 1.08423800  | 1.42349100  |
| C | -2.90277600 | -1.10184500 | 0.00769800  |
| F | -2.84418900 | -1.63911500 | -1.21854200 |
| F | -4.19846400 | -1.01493000 | 0.34140200  |
| F | -2.34809000 | -1.99608000 | 0.84621100  |

**8a**

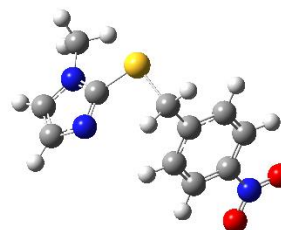

0 1

|   |             |             |             |
|---|-------------|-------------|-------------|
| S | 2.05927900  | 1.66568000  | 0.15598100  |
| N | 2.51779400  | -0.61801700 | -1.29312200 |
| N | 3.15895800  | -0.73515600 | 0.82524400  |
| C | 2.58322700  | 0.01893500  | -0.14892200 |
| C | -1.44531900 | 1.77470600  | 0.11329200  |
| C | -0.53249200 | 1.13174500  | -0.72252700 |
| C | 3.08060900  | -1.84217600 | -1.05551000 |

|   |             |             |             |
|---|-------------|-------------|-------------|
| H | 3.15425800  | -2.58844500 | -1.82985100 |
| C | -2.62792800 | 1.16133800  | 0.47806000  |
| H | -3.34781200 | 1.64736800  | 1.12072400  |
| C | 3.49379800  | -1.93213600 | 0.23983300  |
| H | 3.98115300  | -2.71662400 | 0.79310000  |
| C | -2.89040200 | -0.11138100 | -0.00213100 |
| C | 0.74654500  | 1.80228000  | -1.11085900 |
| H | 0.61233200  | 2.87769100  | -1.22873500 |
| H | 1.15822000  | 1.39564700  | -2.03223300 |
| C | -0.82773200 | -0.14605600 | -1.19337600 |
| H | -0.11709300 | -0.64892000 | -1.83652900 |
| C | -2.00708200 | -0.77524600 | -0.83443100 |
| H | -2.25240400 | -1.76588600 | -1.18960700 |
| C | 3.40848100  | -0.35204800 | 2.19448100  |
| H | 2.62303500  | 0.32505400  | 2.52752500  |
| H | 4.37463300  | 0.14494600  | 2.29860300  |
| H | 3.39514700  | -1.24054300 | 2.82287200  |
| H | -1.22597900 | 2.76935400  | 0.48361300  |
| N | -4.14011100 | -0.76951800 | 0.37978800  |
| O | -4.89765600 | -0.16018100 | 1.11140800  |
| O | -4.34617700 | -1.88625100 | -0.05591000 |

**1b**

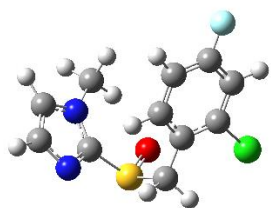

|     |             |             |             |
|-----|-------------|-------------|-------------|
| 0 1 |             |             |             |
| S   | 1.30105400  | -1.80429800 | -0.02547800 |
| Cl  | -2.63176700 | -2.09617600 | 0.14774300  |
| O   | 0.63775500  | -1.89267900 | 1.30762800  |
| N   | 2.35942700  | 0.68320600  | 0.83724700  |
| N   | 2.92171600  | -0.00317900 | -1.19861100 |
| F   | -3.25966600 | 2.86349100  | 0.40074700  |
| C   | 2.21858100  | -0.26482500 | -0.12288200 |

|   |             |             |             |
|---|-------------|-------------|-------------|
| C | -0.88390500 | -0.25414900 | -0.85383400 |
| C | 0.01587500  | -1.35244500 | -1.28779500 |
| H | 0.60136400  | -1.09631400 | -2.17075200 |
| H | -0.51270800 | -2.28882400 | -1.46056000 |
| C | -0.53421800 | 1.07270800  | -1.10999000 |
| H | 0.38151500  | 1.27081000  | -1.65409300 |
| C | -2.07748900 | -0.48184800 | -0.16638900 |
| C | 1.72404500  | 0.78369700  | 2.14111800  |
| H | 0.96316100  | 1.56417000  | 2.12259200  |
| H | 2.47929500  | 1.03149900  | 2.88599200  |
| H | 1.25765100  | -0.16553800 | 2.38308200  |
| C | 3.21003100  | 1.61908700  | 0.31313600  |
| H | 3.49977000  | 2.49096300  | 0.87526900  |
| C | 3.54217700  | 1.18217200  | -0.93871000 |
| H | 4.19803500  | 1.64898400  | -1.65568200 |
| C | -2.88410100 | 0.56206200  | 0.25831600  |
| H | -3.80873300 | 0.37560700  | 0.78555800  |
| C | -1.31864400 | 2.13438400  | -0.69681300 |
| H | -1.04547800 | 3.15981600  | -0.90544900 |
| C | -2.48297600 | 1.85289300  | -0.01084400 |

**2b**

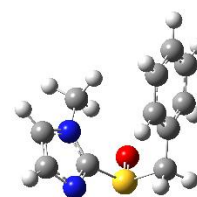

|     |             |             |             |
|-----|-------------|-------------|-------------|
| 0 1 |             |             |             |
| S   | -1.04778000 | 1.79642300  | -0.08957400 |
| O   | -0.45346000 | 2.10624600  | 1.24663100  |
| N   | -1.44414300 | -0.85379000 | 0.82708300  |
| N   | -2.50811300 | -0.25155100 | -1.02829100 |
| C   | -1.67479000 | 0.12231300  | -0.08657400 |
| C   | 1.36279200  | 0.53791500  | -0.78567500 |
| C   | 0.35958900  | 1.52415600  | -1.26501100 |

|   |             |             |             |
|---|-------------|-------------|-------------|
| H | -0.12039400 | 1.23291900  | -2.19979400 |
| H | 0.77452600  | 2.52774800  | -1.37395700 |
| C | 1.33969100  | -0.77698100 | -1.24837300 |
| H | 0.59974500  | -1.07133000 | -1.98407200 |
| C | 2.31653800  | 0.90258700  | 0.16331200  |
| C | -0.54269200 | -0.84597800 | 1.96645800  |
| H | 0.40638700  | -1.30914000 | 1.69515000  |
| H | -1.00307100 | -1.40422300 | 2.78037500  |
| H | -0.36590600 | 0.18077800  | 2.27159400  |
| C | -2.18271500 | -1.92830500 | 0.41587300  |
| H | -2.19187700 | -2.84949800 | 0.97402100  |
| C | -2.82489100 | -1.54209700 | -0.72828400 |
| H | -3.50633700 | -2.11537200 | -1.33579900 |
| C | 3.22898700  | -0.02819400 | 0.63589300  |
| H | 3.96613100  | 0.26841000  | 1.37213000  |
| C | 2.25345700  | -1.70653200 | -0.77706200 |
| H | 2.22952400  | -2.72254900 | -1.15218700 |
| C | 3.20021000  | -1.33434100 | 0.16794100  |
| H | 2.33442200  | 1.91867700  | 0.53685800  |
| H | 3.91773700  | -2.05902600 | 0.53328800  |

**3b**

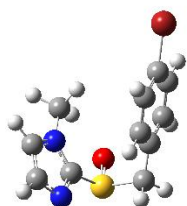

|     |             |             |             |
|-----|-------------|-------------|-------------|
| O 1 |             |             |             |
| S   | -2.85239600 | 1.34221900  | 0.16612100  |
| O   | -2.27036500 | 1.75633300  | 1.47894400  |
| N   | -2.06372600 | -1.31048500 | 0.78176700  |
| N   | -3.42148000 | -1.02794300 | -0.95420800 |
| C   | -2.74127900 | -0.43494000 | -0.00237100 |
| C   | -0.24666500 | 1.25768300  | -0.85573200 |
| C   | -1.60878300 | 1.77695200  | -1.13962600 |

|    |             |             |             |
|----|-------------|-------------|-------------|
| H  | -2.03628000 | 1.38928400  | -2.06447000 |
| H  | -1.64996400 | 2.86735000  | -1.15471700 |
| C  | 0.21141200  | 0.09258400  | -1.46759400 |
| H  | -0.41999500 | -0.42306400 | -2.18191400 |
| C  | 0.58028200  | 1.89933700  | 0.06414400  |
| C  | -1.16164500 | -1.04326300 | 1.88920800  |
| H  | -0.12707400 | -1.09942500 | 1.54973900  |
| H  | -1.32983500 | -1.78669900 | 2.66704400  |
| H  | -1.35964800 | -0.04844300 | 2.27561200  |
| C  | -2.33372500 | -2.55020100 | 0.27141400  |
| H  | -1.92456200 | -3.44150000 | 0.71680900  |
| C  | -3.16424400 | -2.35672100 | -0.79770600 |
| H  | -3.59945100 | -3.09954100 | -1.44642300 |
| C  | 1.83592500  | 1.39548700  | 0.36484700  |
| H  | 2.47243600  | 1.89997500  | 1.07895300  |
| C  | 1.46519900  | -0.42082900 | -1.17760900 |
| H  | 1.81596900  | -1.32105000 | -1.66369200 |
| C  | 2.26674900  | 0.23745500  | -0.25957500 |
| Br | 3.98575700  | -0.45753300 | 0.14415800  |
| H  | 0.23527700  | 2.79831500  | 0.55874200  |

**4b**

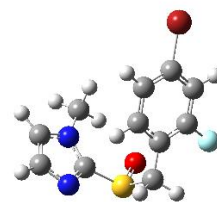

|     |             |             |             |
|-----|-------------|-------------|-------------|
| O 1 |             |             |             |
| S   | -2.75919100 | 1.31413300  | 0.18988100  |
| O   | -2.10786500 | 1.61529100  | 1.49759100  |
| N   | -2.35293800 | -1.42949100 | 0.78726400  |
| N   | -3.42403200 | -0.95107300 | -1.09904900 |
| C   | -2.81484300 | -0.46295400 | -0.04524700 |
| C   | -0.18599500 | 1.07924700  | -0.87644000 |
| C   | -1.52362800 | 1.65814200  | -1.15273300 |
| H   | -1.98670100 | 1.25344600  | -2.05244400 |

|    |             |             |             |
|----|-------------|-------------|-------------|
| H  | -1.50548600 | 2.74613700  | -1.20608800 |
| C  | 0.15681900  | -0.21001900 | -1.28068200 |
| H  | -0.56431200 | -0.79060100 | -1.84395700 |
| C  | 0.77450300  | 1.79107500  | -0.16922800 |
| C  | -1.59023800 | -1.30393300 | 2.01868800  |
| H  | -0.54380300 | -1.54718100 | 1.83325400  |
| H  | -1.99725400 | -1.99221100 | 2.75820800  |
| H  | -1.66147200 | -0.28293300 | 2.37873300  |
| C  | -2.69057300 | -2.61807500 | 0.19862900  |
| H  | -2.44456600 | -3.56095900 | 0.65750500  |
| C  | -3.34422400 | -2.30446900 | -0.96039800 |
| H  | -3.76862900 | -2.97597600 | -1.68911800 |
| C  | 2.01604600  | 1.27383400  | 0.14492900  |
| H  | 2.72436200  | 1.87562000  | 0.69611700  |
| C  | 1.39095500  | -0.76384300 | -0.98496200 |
| H  | 1.63888800  | -1.76312100 | -1.31418000 |
| C  | 2.30779600  | -0.01341700 | -0.26685500 |
| F  | 0.50923600  | 3.04669800  | 0.20405300  |
| Br | 3.99985400  | -0.75487200 | 0.15299900  |

## 5b

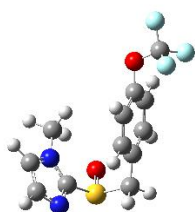

0 1

|   |            |             |             |
|---|------------|-------------|-------------|
| S | 3.09909100 | -1.42127100 | -0.07140500 |
| O | 2.62766500 | -1.90669800 | 1.26109800  |
| N | 2.58312500 | 1.21470900  | 0.83739900  |
| N | 3.68842300 | 0.99480800  | -1.07740800 |
| C | 3.09188900 | 0.36765300  | -0.09218500 |
| C | 0.41358500 | -1.10027800 | -0.79390500 |
| C | 1.70245300 | -1.66875200 | -1.26591500 |
| H | 2.05686700 | -1.22524400 | -2.19644600 |

|   |             |             |             |
|---|-------------|-------------|-------------|
| H | 1.66925700  | -2.75395600 | -1.37521600 |
| C | -0.02490900 | 0.14007900  | -1.25452800 |
| H | 0.56602500  | 0.68063500  | -1.98441600 |
| C | -0.35110700 | -1.77535300 | 0.15604900  |
| C | 1.80847100  | 0.91253500  | 2.02900900  |
| H | 0.74701700  | 1.06612200  | 1.83275700  |
| H | 2.12830700  | 1.57289700  | 2.83377400  |
| H | 1.97601000  | -0.12296600 | 2.30783000  |
| C | 2.87530900  | 2.47387100  | 0.39012600  |
| H | 2.59039600  | 3.34847400  | 0.95056100  |
| C | 3.54934800  | 2.31934900  | -0.78958200 |
| H | 3.95225200  | 3.08530200  | -1.43221700 |
| C | -1.53313700 | -1.23045100 | 0.63032800  |
| H | -2.13032900 | -1.74539000 | 1.37078700  |
| C | -1.20587900 | 0.69363600  | -0.78879900 |
| H | -1.55370700 | 1.65448200  | -1.14363000 |
| C | -1.94813200 | -0.00441200 | 0.14602800  |
| H | -0.01137900 | -2.73010800 | 0.53578900  |
| O | -3.10415600 | 0.57994700  | 0.67157000  |
| C | -4.26181800 | 0.31964800  | 0.03848900  |
| F | -4.55551800 | -0.98427700 | 0.01695300  |
| F | -5.22539900 | 0.95512400  | 0.68510000  |
| F | -4.25925200 | 0.73718900  | -1.23194900 |

## 6b

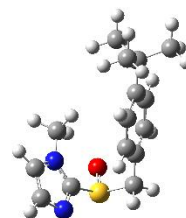

0 1

|   |            |             |             |
|---|------------|-------------|-------------|
| S | 2.82781100 | -1.37992700 | 0.13083400  |
| O | 2.26088700 | -1.79595800 | 1.45042000  |
| N | 2.06882400 | 1.27201300  | 0.76889100  |
| N | 3.48840100 | 1.00232100  | -0.91884900 |

|   |             |             |             |
|---|-------------|-------------|-------------|
| C | 2.75980200  | 0.40094000  | -0.00854100 |
| C | 0.20454500  | -1.23385000 | -0.86649000 |
| C | 1.55753300  | -1.77251300 | -1.16057100 |
| H | 1.98467500  | -1.38475100 | -2.08604900 |
| H | 1.57920800  | -2.86355700 | -1.18809100 |
| C | -0.24575000 | -0.06329700 | -1.46577400 |
| H | 0.38967500  | 0.45355300  | -2.17648400 |
| C | -0.63679500 | -1.86914100 | 0.04569200  |
| C | 1.11421100  | 0.99266400  | 1.82755200  |
| H | 0.09911000  | 1.01347500  | 1.43000700  |
| H | 1.22049300  | 1.75008400  | 2.60290900  |
| H | 1.31727700  | 0.00787700  | 2.23708600  |
| C | 2.38033200  | 2.51719500  | 0.29795900  |
| H | 1.97130000  | 3.40606700  | 0.74832200  |
| C | 3.24872100  | 2.33171700  | -0.74227700 |
| H | 3.72313200  | 3.08052700  | -1.35574500 |
| C | -1.88418900 | -1.34713400 | 0.33638100  |
| H | -2.50935100 | -1.87245300 | 1.04862000  |
| C | -1.49955100 | 0.45401300  | -1.17048000 |
| H | -1.81016500 | 1.36232500  | -1.66890000 |
| C | -2.34941500 | -0.17457500 | -0.26356200 |
| H | -0.30503200 | -2.77586100 | 0.53619300  |
| C | -3.74064400 | 0.35737700  | 0.07666800  |
| C | -4.06838100 | 1.64653300  | -0.67625200 |
| H | -3.36816200 | 2.44895700  | -0.43405000 |
| H | -4.06021400 | 1.49903900  | -1.75818600 |
| H | -5.06773500 | 1.98737500  | -0.39853300 |
| C | -4.79211500 | -0.69761500 | -0.29660100 |
| H | -4.63825900 | -1.63190400 | 0.24518800  |
| H | -5.79421600 | -0.33371900 | -0.05661300 |
| H | -4.75808200 | -0.92111000 | -1.36475400 |
| C | -3.82427500 | 0.64586600  | 1.58234100  |
| H | -4.82026800 | 1.01296000  | 1.84190800  |
| H | -3.63333300 | -0.24769500 | 2.17826700  |
| H | -3.09687700 | 1.40588300  | 1.87564100  |

7b

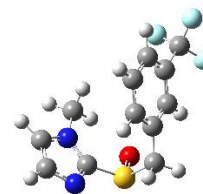

|     |             |             |             |
|-----|-------------|-------------|-------------|
| 0 1 |             |             |             |
| S   | -1.95401500 | 1.83061000  | -0.12923400 |
| O   | -0.99423200 | 2.16904400  | 0.96435500  |
| N   | -2.29899400 | -0.69103500 | 1.12000100  |
| N   | -3.68178600 | -0.18028100 | -0.54272500 |
| C   | -2.65472400 | 0.21212900  | 0.17223300  |
| C   | 0.07979100  | 0.32975200  | -1.32772700 |
| C   | -0.94281900 | 1.36889500  | -1.61328100 |
| H   | -1.67462500 | 1.06061100  | -2.35991900 |
| H   | -0.50426100 | 2.32269000  | -1.91102300 |
| C   | -0.14827700 | -1.00192200 | -1.66722400 |
| H   | -1.06889100 | -1.27340900 | -2.17060700 |
| C   | 1.26294600  | 0.66732400  | -0.67428700 |
| C   | -1.19068100 | -0.65071300 | 2.05954100  |
| H   | -0.36391700 | -1.25648000 | 1.68789400  |
| H   | -1.52717500 | -1.04456200 | 3.01742400  |
| H   | -0.85914500 | 0.37618800  | 2.17526700  |
| C   | -3.16738400 | -1.73806800 | 0.97736600  |
| H   | -3.11574600 | -2.60101700 | 1.61988600  |
| C   | -4.00574500 | -1.40926400 | -0.05172800 |
| H   | -4.82824800 | -1.98101000 | -0.44998300 |
| C   | 2.19709800  | -0.31259900 | -0.37828600 |
| C   | 0.79076700  | -1.97760200 | -1.37138200 |
| H   | 0.60722400  | -3.00691100 | -1.65272800 |
| C   | 1.96776300  | -1.63764200 | -0.72473400 |
| H   | 1.45005300  | 1.69522700  | -0.39501700 |
| H   | 2.71005700  | -2.39258600 | -0.50043200 |
| C   | 3.45070500  | 0.04395700  | 0.36291700  |
| F   | 3.77189500  | 1.33511000  | 0.22903500  |

|   |            |             |             |
|---|------------|-------------|-------------|
| F | 4.50166600 | -0.67536100 | -0.05860300 |
| F | 3.32883800 | -0.19387500 | 1.68187500  |

### 8b

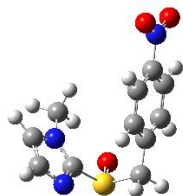

0 1

|   |             |             |             |
|---|-------------|-------------|-------------|
| S | -2.39976400 | 1.43817200  | 0.06477400  |
| O | -1.80315300 | 1.89000400  | 1.35685200  |
| N | -1.87318000 | -1.22772500 | 0.88721400  |
| N | -2.98090300 | -0.94432500 | -1.01775000 |
| C | -2.38205700 | -0.35083100 | -0.01375000 |
| C | 0.19885900  | 1.15591300  | -0.91723600 |
| C | -1.12816900 | 1.72719200  | -1.25653600 |
| H | -1.56849000 | 1.30006600  | -2.15713400 |
| H | -1.11042300 | 2.81482300  | -1.33993400 |
| C | 0.59548300  | -0.07298100 | -1.44671800 |
| H | -0.05876900 | -0.59611000 | -2.13338000 |
| C | 1.04416200  | 1.81837800  | -0.02643900 |
| C | -1.11158700 | -0.97037500 | 2.09825400  |
| H | -0.06204900 | -1.21599900 | 1.93580500  |
| H | -1.50650000 | -1.58735200 | 2.90428400  |
| H | -1.20043300 | 0.07962800  | 2.35713000  |
| C | -2.16937400 | -2.47158700 | 0.40002100  |
| H | -1.88202100 | -3.36440300 | 0.92958500  |
| C | -2.84510700 | -2.27796200 | -0.77255400 |
| H | -3.24811000 | -3.02200300 | -1.44029000 |
| C | 2.26494800  | 1.27174600  | 0.32533500  |
| H | 2.93340400  | 1.77064300  | 1.01217300  |
| C | 1.81370100  | -0.62971500 | -1.10501600 |
| H | 2.14048500  | -1.57605000 | -1.51145200 |
| C | 2.63116900  | 0.05366500  | -0.22043500 |
| H | 0.73741400  | 2.76472200  | 0.39884500  |

|   |            |             |             |
|---|------------|-------------|-------------|
| N | 3.92269800 | -0.53053400 | 0.14763700  |
| O | 4.62589700 | 0.09605300  | 0.91661300  |
| O | 4.21091000 | -1.60871900 | -0.33612400 |

### 1c

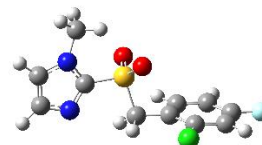

0 1

|    |             |             |             |
|----|-------------|-------------|-------------|
| S  | 1.00004900  | -0.50980800 | 0.28666200  |
| Cl | -1.73463100 | 2.48438500  | 0.39977200  |
| O  | 0.89537800  | -1.94899700 | 0.18437000  |
| O  | 0.78139900  | 0.11407900  | 1.57278600  |
| N  | 2.82121900  | 0.51412900  | -1.46667300 |
| N  | 3.73551700  | -0.19910300 | 0.42897500  |
| F  | -5.41681000 | -0.90223100 | 0.25692200  |
| C  | -1.49689500 | -0.03636100 | -0.62171400 |
| C  | 2.60320700  | -0.02392900 | -0.29397300 |
| C  | -0.06883200 | 0.24469000  | -0.95613600 |
| H  | 0.16902200  | 1.30513800  | -0.96249400 |
| H  | 0.23499300  | -0.19673800 | -1.90338100 |
| C  | 4.75130700  | 0.26273900  | -0.36018700 |
| H  | 5.77547100  | 0.24358500  | -0.02789600 |
| C  | 4.17127700  | 0.70068600  | -1.51856500 |
| H  | 4.64879800  | 1.14309900  | -2.37730600 |
| C  | -2.32352300 | 0.90167900  | -0.00343100 |
| C  | -2.04663200 | -1.28074000 | -0.92706400 |
| H  | -1.41456200 | -2.02482000 | -1.39436500 |
| C  | -3.64711000 | 0.61971000  | 0.29234200  |
| H  | -4.28400800 | 1.35367500  | 0.76466400  |
| C  | -4.13884400 | -0.62726400 | -0.02940300 |
| C  | -3.36201500 | -1.59203400 | -0.63780300 |
| H  | -3.78389700 | -2.55900500 | -0.87464700 |

|   |            |             |            |
|---|------------|-------------|------------|
| C | 3.86905500 | -0.81303000 | 1.73685500 |
| H | 3.03996000 | -0.50418700 | 2.36902000 |
| H | 4.80408900 | -0.48152600 | 2.18242300 |
| H | 3.87202900 | -1.89947600 | 1.65007000 |

## 2c

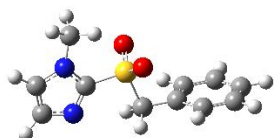

O 1

|   |             |             |             |
|---|-------------|-------------|-------------|
| S | -0.42180300 | -0.42070400 | 0.06879100  |
| O | -0.24769300 | -0.94185100 | 1.40627900  |
| O | -0.28439600 | -1.32290800 | -1.05519300 |
| N | -2.24684900 | 1.60765400  | -0.11472100 |
| N | -3.17292900 | -0.40859900 | 0.00001500  |
| C | 2.08090400  | 0.58314700  | -0.09812200 |
| C | -2.03139800 | 0.32006200  | -0.02695700 |
| C | 0.64847300  | 1.00940100  | -0.16861200 |
| H | 0.37374800  | 1.42416400  | -1.13675800 |
| H | 0.37170400  | 1.71560100  | 0.61188200  |
| C | -4.19247700 | 0.49924500  | -0.07029100 |
| H | -5.22385700 | 0.18947600  | -0.06734100 |
| C | -3.60540900 | 1.73193400  | -0.14350900 |
| H | -4.08390000 | 2.69441400  | -0.22057500 |
| C | 2.75295300  | 0.18147400  | -1.24864700 |
| C | 2.75349800  | 0.57387700  | 1.12020900  |
| H | 2.23184700  | 0.87203400  | 2.02158800  |
| C | 4.08024100  | -0.21127500 | -1.18382100 |
| H | 4.59465900  | -0.51910300 | -2.08584000 |
| C | 4.74689000  | -0.21115600 | 0.03273000  |
| C | 4.08064400  | 0.18095400  | 1.18469800  |
| H | 4.59547800  | 0.18015000  | 2.13757200  |
| C | -3.30139500 | -1.84651900 | 0.14155100  |

|   |             |             |             |
|---|-------------|-------------|-------------|
| H | -2.52758600 | -2.33948200 | -0.44261400 |
| H | -4.27761700 | -2.14715000 | -0.23193200 |
| H | -3.20397100 | -2.13795200 | 1.18705000  |
| H | 2.23104900  | 0.17338300  | -2.19794100 |
| H | 5.78491000  | -0.51645800 | 0.08313600  |

## 3c

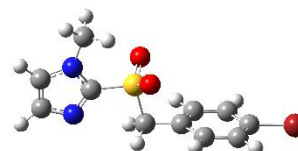

O 1

|   |             |             |             |
|---|-------------|-------------|-------------|
| S | 1.81269500  | 0.37645200  | 0.06056500  |
| O | 1.58067100  | 0.88668600  | 1.39315600  |
| O | 1.62587700  | 1.26205300  | -1.06930000 |
| N | 3.76657900  | -1.52718000 | -0.07739000 |
| N | 4.55985200  | 0.54646200  | 0.01246700  |
| C | -0.61236800 | -0.79043100 | -0.13020300 |
| C | 3.46820500  | -0.25489800 | -0.01154400 |
| C | 0.84399900  | -1.12425300 | -0.18538700 |
| H | 1.15435500  | -1.52192600 | -1.14980400 |
| H | 1.15766300  | -1.81011600 | 0.59912200  |
| C | 5.63604500  | -0.29483400 | -0.03570600 |
| H | 6.64531100  | 0.08072600  | -0.02961900 |
| C | 5.13036500  | -1.56397200 | -0.09407200 |
| H | 5.67053500  | -2.49456100 | -0.15253000 |
| C | -1.29993900 | -0.43420300 | -1.28588800 |
| C | -1.29823700 | -0.81648200 | 1.07988800  |
| H | -0.77300000 | -1.07633300 | 1.99071000  |
| C | -2.64921200 | -0.12405800 | -1.24248100 |
| H | -3.17928900 | 0.14833400  | -2.14469000 |
| C | -3.31104800 | -0.16629000 | -0.02753100 |
| C | -2.64734700 | -0.50857700 | 1.13804300  |



|    |             |             |             |
|----|-------------|-------------|-------------|
| H  | -3.17609400 | -0.53402300 | 2.08088000  |
| C  | 4.59475500  | 1.99177500  | 0.13306600  |
| H  | 3.79333500  | 2.42521300  | -0.46092700 |
| H  | 5.55104600  | 2.34928000  | -0.24173100 |
| H  | 4.47488700  | 2.29148000  | 1.17389900  |
| Br | -5.16041100 | 0.24872700  | 0.04095000  |
| H  | -0.77620700 | -0.39431700 | -2.23311500 |

### 4c

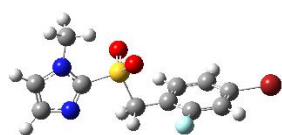

|     |             |             |             |
|-----|-------------|-------------|-------------|
| 0 1 |             |             |             |
| S   | 1.85616200  | -0.46129800 | 0.09472600  |
| O   | 1.65361000  | -1.69471400 | -0.63258500 |
| O   | 1.63672900  | -0.45007800 | 1.52415300  |
| N   | 3.79885500  | 1.08299500  | -1.03351700 |
| N   | 4.60002500  | -0.44628200 | 0.36581800  |
| C   | -0.56896300 | 0.54567200  | -0.51179800 |
| C   | 3.50679800  | 0.10722900  | -0.21199400 |
| C   | 0.88331900  | 0.84365500  | -0.68404200 |
| H   | 1.18139600  | 1.77352800  | -0.20636500 |
| H   | 1.19279300  | 0.85728700  | -1.72728700 |
| C   | 5.66972800  | 0.23640800  | -0.14154200 |
| H   | 6.67863300  | 0.00018700  | 0.15171200  |
| C   | 5.15905300  | 1.17443800  | -0.99566100 |
| H   | 5.69318000  | 1.90926100  | -1.57524300 |
| C   | -1.31878000 | 1.18766600  | 0.46347300  |
| C   | -1.23023800 | -0.38314900 | -1.31088200 |
| H   | -0.66988200 | -0.91156400 | -2.07161200 |
| C   | -2.66482300 | 0.94936800  | 0.65504900  |
| H   | -3.20119000 | 1.48377700  | 1.42586100  |
| C   | -3.28127200 | 0.01874800  | -0.16092500 |
| C   | -2.57745800 | -0.65377700 | -1.14610500 |

|    |             |             |             |
|----|-------------|-------------|-------------|
| H  | -3.07339800 | -1.37906800 | -1.77523300 |
| C  | 4.64940900  | -1.57529200 | 1.27598600  |
| H  | 3.81743400  | -1.51552300 | 1.97354700  |
| H  | 5.58540000  | -1.53573600 | 1.82830700  |
| H  | 4.59165900  | -2.51333200 | 0.72400900  |
| F  | -0.72651400 | 2.09694100  | 1.24654000  |
| Br | -5.12661400 | -0.33328500 | 0.07628100  |

### 5c

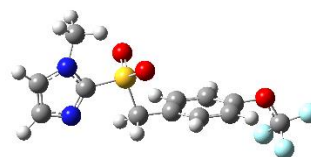

|     |             |             |             |
|-----|-------------|-------------|-------------|
| 0 1 |             |             |             |
| S   | 2.15861000  | -0.43160500 | -0.07819700 |
| O   | 1.99173400  | -0.93998700 | -1.42119000 |
| O   | 2.03044300  | -1.34655100 | 1.03626900  |
| N   | 3.93475400  | 1.63256100  | 0.12266200  |
| N   | 4.90886100  | -0.36156900 | 0.01142000  |
| C   | -0.36089700 | 0.51472200  | 0.08987200  |
| C   | 3.75078400  | 0.34041500  | 0.03069400  |
| C   | 1.05957000  | 0.97558000  | 0.17155900  |
| H   | 1.31950100  | 1.38586300  | 1.14548800  |
| H   | 1.32213100  | 1.69721600  | -0.59941000 |
| C   | 5.90583800  | 0.57002300  | 0.09129800  |
| H   | 6.94424700  | 0.28475000  | 0.09565600  |
| C   | 5.28955200  | 1.78866900  | 0.16237800  |
| H   | 5.74469800  | 2.76189200  | 0.24517300  |
| C   | -1.02539700 | 0.07607800  | 1.23111200  |
| C   | -1.02655400 | 0.49674600  | -1.13200700 |
| H   | -0.51126800 | 0.81544300  | -2.02934800 |
| C   | -2.33844900 | -0.35728300 | 1.16119100  |
| H   | -2.86304700 | -0.70339100 | 2.04132100  |
| C   | -2.98044500 | -0.34881800 | -0.06244300 |

|   |             |             |             |
|---|-------------|-------------|-------------|
| C | -2.33956200 | 0.06567100  | -1.21444700 |
| H | -2.86503600 | 0.04438400  | -2.15946800 |
| C | 5.07251800  | -1.79590700 | -0.13245700 |
| H | 4.30619400  | -2.30872900 | 0.44441900  |
| H | 6.05248900  | -2.07420600 | 0.24822400  |
| H | 4.99094500  | -2.08669900 | -1.17947800 |
| H | -0.50935000 | 0.06584400  | 2.18294100  |
| O | -4.28241200 | -0.84736000 | -0.15066300 |
| C | -5.28568800 | 0.03265800  | 0.00899000  |
| F | -5.26568900 | 0.62620800  | 1.20744500  |
| F | -6.42518900 | -0.62934800 | -0.10995800 |
| F | -5.26693500 | 1.00827500  | -0.90556600 |

### 6c

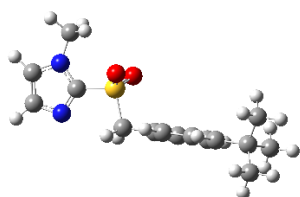

0 1

|   |             |             |             |
|---|-------------|-------------|-------------|
| S | -1.78220100 | 0.36794500  | -0.06688800 |
| O | -1.56470400 | 0.87049800  | -1.40520100 |
| O | -1.59639200 | 1.26607400  | 1.05384500  |
| N | -3.74028900 | -1.53464500 | 0.10251900  |
| N | -4.52910900 | 0.53897300  | -0.01243000 |
| C | 0.64755600  | -0.79736600 | 0.12264400  |
| C | -3.43865300 | -0.26415900 | 0.01883900  |
| C | -0.80915800 | -1.12747300 | 0.18713800  |
| H | -1.11744900 | -1.51547500 | 1.15645300  |
| H | -1.12771100 | -1.81947100 | -0.59018300 |
| C | -5.60742100 | -0.29893100 | 0.04994000  |
| H | -6.61580100 | 0.07898800  | 0.04184200  |
| C | -5.10427800 | -1.56809900 | 0.12355600  |
| H | -5.64630900 | -2.49668800 | 0.19584400  |
| C | 1.34306100  | -0.41551900 | 1.26625400  |

|   |             |             |             |
|---|-------------|-------------|-------------|
| C | 1.33668500  | -0.85108800 | -1.08062200 |
| H | 0.81330400  | -1.13268700 | -1.98667900 |
| C | 2.68942000  | -0.10956000 | 1.20096500  |
| H | 3.19758100  | 0.18094200  | 2.11256700  |
| C | 3.39649500  | -0.16548800 | -0.00199500 |
| C | 2.68810600  | -0.54290200 | -1.13895900 |
| H | 3.18633100  | -0.60072700 | -2.09696300 |
| C | -4.56114100 | 1.98238000  | -0.15193600 |
| H | -3.75645400 | 2.42141800  | 0.43346200  |
| H | -5.51545000 | 2.34708100  | 0.22122700  |
| H | -4.44364000 | 2.26823000  | -1.19695300 |
| H | 0.82312400  | -0.35319600 | 2.21488200  |
| C | 4.88404700  | 0.18002600  | -0.02837500 |
| C | 5.48166400  | 0.05990400  | -1.43001800 |
| H | 6.54258800  | 0.31580800  | -1.39743400 |
| H | 5.40025000  | -0.95643000 | -1.82129700 |
| H | 5.00076900  | 0.73972400  | -2.13643900 |
| C | 5.07836700  | 1.62445200  | 0.45472000  |
| H | 4.71010100  | 1.76477300  | 1.47198200  |
| H | 6.13946200  | 1.88584800  | 0.44491900  |
| H | 4.54832800  | 2.32659300  | -0.19176500 |
| C | 5.64515200  | -0.77502000 | 0.90218800  |
| H | 5.52729300  | -1.81132400 | 0.57898500  |
| H | 6.71157300  | -0.53622800 | 0.89779600  |
| H | 5.29247200  | -0.70412200 | 1.93214900  |

### 7c

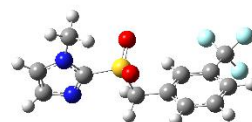

0 1

|   |            |             |            |
|---|------------|-------------|------------|
| S | 1.54781400 | 0.22948800  | 0.40572600 |
| O | 1.06488400 | -0.92812800 | 1.12397800 |
| O | 1.69011400 | 1.48303900  | 1.11532400 |

|   |             |             |             |
|---|-------------|-------------|-------------|
| N | 3.32781500  | -0.30686900 | -1.59491400 |
| N | 4.22626700  | -0.39460800 | 0.43567500  |
| C | -0.85865800 | 0.82364500  | -0.65216400 |
| C | 3.11739400  | -0.17622000 | -0.31026900 |
| C | 0.53870800  | 0.48716600  | -1.06611100 |
| H | 1.02312800  | 1.28759300  | -1.62205600 |
| H | 0.60596100  | -0.43551400 | -1.63892900 |
| C | 5.21727900  | -0.69423500 | -0.45666600 |
| H | 6.21990400  | -0.91527500 | -0.13177100 |
| C | 4.64862500  | -0.63291200 | -1.69882900 |
| H | 5.11655400  | -0.79983800 | -2.65502800 |
| C | -1.22409700 | 2.14230000  | -0.40650900 |
| C | -1.80249700 | -0.18567300 | -0.49024900 |
| H | -1.52728800 | -1.21767100 | -0.66180100 |
| C | -2.51756700 | 2.45200500  | -0.01481000 |
| H | -2.79249900 | 3.48179600  | 0.17408800  |
| C | -3.45679300 | 1.44762500  | 0.13766700  |
| C | -3.09324000 | 0.12843600  | -0.10167500 |
| C | 4.33619800  | -0.37786400 | 1.88220400  |
| H | 3.76133700  | 0.45482000  | 2.28167900  |
| H | 5.38246400  | -0.24999500 | 2.14964600  |
| H | 3.96155300  | -1.30970400 | 2.30468800  |
| H | -0.48892000 | 2.92998300  | -0.51622900 |
| H | -4.46789000 | 1.68394900  | 0.44381700  |
| C | -4.13107700 | -0.94362600 | 0.04288000  |
| F | -3.60883400 | -2.17293900 | -0.01675200 |
| F | -4.78850100 | -0.84441300 | 1.20841600  |
| F | -5.06083500 | -0.86429100 | -0.92636200 |

**8c**

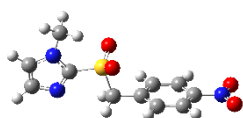

O 1

|   |            |            |            |
|---|------------|------------|------------|
| S | 1.38085800 | 0.37621300 | 0.11129500 |
|---|------------|------------|------------|

|   |             |             |             |
|---|-------------|-------------|-------------|
| O | 1.14589900  | 0.71227700  | 1.49685200  |
| O | 1.19749800  | 1.39658500  | -0.89823500 |
| N | 3.30713100  | -1.51886100 | -0.25872200 |
| N | 4.12959900  | 0.51942900  | 0.07050700  |
| C | -1.05120200 | -0.73568500 | -0.22103100 |
| C | 3.02738000  | -0.25922900 | -0.04219100 |
| C | 0.40125100  | -1.07534500 | -0.32343100 |
| H | 0.70407800  | -1.34813800 | -1.33242000 |
| H | 0.70813200  | -1.85891500 | 0.36629900  |
| C | 5.19331500  | -0.32502900 | -0.08175100 |
| H | 6.20780200  | 0.03337200  | -0.03641800 |
| C | 4.66995900  | -1.57180200 | -0.28666700 |
| H | 5.19687700  | -2.49614100 | -0.45706800 |
| C | -1.73185900 | -0.22503400 | -1.32384600 |
| C | -1.73058800 | -0.91215500 | 0.98196400  |
| H | -1.20224400 | -1.29332200 | 1.84640900  |
| C | -3.07480000 | 0.09197300  | -1.23683700 |
| H | -3.62209400 | 0.48581100  | -2.08095000 |
| C | -3.72520900 | -0.10378000 | -0.03149700 |
| C | -3.07353400 | -0.59950800 | 1.08374200  |
| H | -3.61980600 | -0.73219000 | 2.00632100  |
| C | 4.18542000  | 1.94010100  | 0.36063300  |
| H | 3.39121900  | 2.45251900  | -0.17755300 |
| H | 5.14710100  | 2.32509300  | 0.02972900  |
| H | 4.06964400  | 2.11648600  | 1.42972200  |
| H | -1.20451800 | -0.07120300 | -2.25662100 |
| N | -5.15077300 | 0.22366100  | 0.06676000  |
| O | -5.69772100 | 0.65775200  | -0.92833100 |
| O | -5.69722800 | 0.03970800  | 1.13689800  |

**1d**

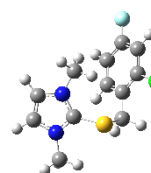

1 1

|    |             |             |             |
|----|-------------|-------------|-------------|
| S  | 1.31890400  | 1.68821600  | 0.17830600  |
| Cl | -2.18007000 | 2.32880800  | 0.67245900  |
| F  | -3.93793100 | -2.29895700 | -0.08923100 |
| N  | 3.15552000  | -0.30603400 | -0.32924800 |
| N  | 1.66667400  | -0.87031200 | 1.13846300  |
| C  | 2.04887100  | 0.11871700  | 0.31059600  |
| C  | -2.06857600 | 0.75751500  | -0.04877600 |
| C  | -0.99078900 | 0.44328500  | -0.88087400 |
| C  | 3.46178700  | -1.56914500 | 0.09277500  |
| H  | 4.31367600  | -2.10948700 | -0.28213500 |
| C  | -3.06834300 | -0.15928200 | 0.22303000  |
| H  | -3.90561900 | 0.09258000  | 0.85893900  |
| C  | 2.52901800  | -1.92218100 | 1.01086800  |
| H  | 2.41731800  | -2.82809900 | 1.58086600  |
| C  | -2.98108200 | -1.41423800 | -0.34995300 |
| C  | 0.08665700  | 1.41993900  | -1.19072800 |
| H  | -0.29562700 | 2.43213400  | -1.32774600 |
| H  | 0.63972100  | 1.13922200  | -2.08421300 |
| C  | 3.93123100  | 0.45179100  | -1.30075400 |
| H  | 3.84824300  | -0.01373600 | -2.28137800 |
| H  | 4.97339300  | 0.47061300  | -0.98901500 |
| H  | 3.54497800  | 1.46640100  | -1.33654800 |
| C  | -0.95695900 | -0.83283200 | -1.44086300 |
| H  | -0.14770800 | -1.08961300 | -2.11512300 |
| C  | -1.93986800 | -1.77304000 | -1.18493200 |
| H  | -1.92059300 | -2.75742400 | -1.63242000 |
| C  | 0.52189000  | -0.84764800 | 2.03969100  |
| H  | 0.18268300  | 0.17846700  | 2.14667500  |
| H  | 0.83134800  | -1.23645000 | 3.00724900  |
| H  | -0.28008000 | -1.45804900 | 1.62824700  |

**2d**

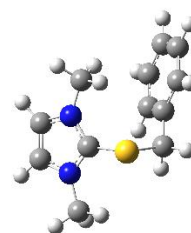

1 1

|   |             |             |             |
|---|-------------|-------------|-------------|
| S | 0.85474600  | -1.62000900 | -0.88207100 |
| N | 2.53980900  | 0.12551200  | 0.42418700  |
| N | 1.06312100  | 1.12819500  | -0.80207100 |
| C | 1.48394300  | -0.07955800 | -0.38692000 |
| C | -2.57612700 | -0.94958100 | -0.50664200 |
| C | -1.54376900 | -0.91042600 | 0.42893000  |
| C | 2.77497300  | 1.46765400  | 0.52435000  |
| H | 3.57733200  | 1.86748000  | 1.11973400  |
| C | -3.57490600 | 0.00953300  | -0.48912200 |
| H | -4.37888200 | -0.03673200 | -1.21289500 |
| C | 1.84947800  | 2.09460700  | -0.24249900 |
| H | 1.69466000  | 3.14195600  | -0.43469600 |
| C | -3.55357000 | 1.02120800  | 0.46338600  |
| C | -0.45553600 | -1.92825400 | 0.40525500  |
| H | -0.81432600 | -2.91372700 | 0.10390000  |
| H | 0.04430400  | -2.02872000 | 1.36662700  |
| C | 3.33038300  | -0.90324900 | 1.08434100  |
| H | 3.18330200  | -0.84477700 | 2.16145600  |
| H | 4.38154800  | -0.75346500 | 0.84713000  |
| H | 3.01042500  | -1.87444400 | 0.71795900  |
| C | -1.53727300 | 0.09803100  | 1.38901900  |
| H | -0.75945700 | 0.11872200  | 2.14520700  |
| C | -2.53651600 | 1.06129000  | 1.40608200  |
| H | -2.53011400 | 1.83265300  | 2.16612900  |
| C | -0.05763400 | 1.39316200  | -1.69475700 |
| H | -0.29050900 | 0.48424900  | -2.24076300 |
| H | 0.23066500  | 2.17886400  | -2.38929300 |
| H | -0.92525200 | 1.69928300  | -1.11241700 |
| H | -4.33939000 | 1.76583500  | 0.48093500  |

H -2.60143200 -1.73949000 -1.24922200

### 3d

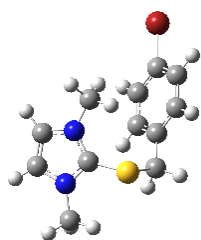

1 1

S 2.56488100 1.51126200 0.75232000  
N 3.57189600 -0.73806200 -0.48067800  
N 1.94922600 -1.17341000 0.88589200  
C 2.67874500 -0.17536400 0.35627600  
C -0.92613500 1.88847200 0.54350400  
C -0.00476900 1.48293600 -0.42020500  
C 3.39440700 -2.09274200 -0.48199300  
H 4.00246600 -2.75128200 -1.07763500  
C -2.16497800 1.28007500 0.64225000  
H -2.87827100 1.60687500 1.38669000  
C 2.37806500 -2.36444600 0.37295700  
H 1.93518500 -3.30334900 0.65638300  
C -2.49087200 0.25119600 -0.23143100  
C 1.33808300 2.12008700 -0.51145400  
H 1.31027000 3.18523900 -0.27627000  
H 1.79065000 2.00236800 -1.49398000  
C 4.58684200 -0.03726300 -1.25424100  
H 4.35769600 -0.11346800 -2.31581200  
H 5.55899200 -0.48286000 -1.05428400  
H 4.59615700 1.00538600 -0.94988400  
C -0.35950000 0.46208200 -1.29740600  
H 0.32707900 0.15508000 -2.07913400  
C -1.59688500 -0.15785100 -1.20855900  
H -1.87007500 -0.94139500 -1.90233700  
C 0.86387900 -1.03577400 1.84834800  
H 0.92829900 -0.05455000 2.30815200

H 0.97171100 -1.80763200 2.60697900

H -0.09267100 -1.13741900 1.33853100

H -0.67809100 2.69376900 1.22592700

Br -4.17504700 -0.58814500 -0.09700600

### 4d

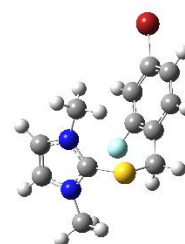

1 1

S -2.54436500 1.53802100 -0.85649400  
N -3.45951500 -0.70373100 0.46107400  
N -2.03969900 -1.15728800 -1.10976100  
C -2.66552600 -0.15069600 -0.47347400  
C 1.03804100 1.96828200 -0.55724000  
C 0.03947800 1.48354200 0.28585500  
C -3.32098100 -2.06133600 0.42128400  
H -3.85890100 -2.71328600 1.08733100  
C 2.27792000 1.36037000 -0.63707900  
H 3.04202300 1.75683600 -1.29081700  
C -2.43602800 -2.34612600 -0.56535500  
H -2.06580300 -3.29183400 -0.92106200  
C 2.53735800 0.24153800 0.14292600  
C -1.29553300 2.12941100 0.39132600  
H -1.24532800 3.19241900 0.15401400  
H -1.73580600 2.02056800 1.37891900  
C -4.30950100 0.01659000 1.39668700  
H -3.82126100 0.07600800 2.36826800  
H -5.25551400 -0.51119600 1.49087700  
H -4.48765800 1.01570900 1.00844800  
C 0.35108000 0.36429600 1.04471600  
C 1.57485000 -0.26858600 0.99977200  
H 1.76521900 -1.12742500 1.62816800

|    |             |             |             |
|----|-------------|-------------|-------------|
| C  | -1.09340700 | -1.03207800 | -2.20999800 |
| H  | -1.00942500 | 0.01635900  | -2.47802100 |
| H  | -1.45810500 | -1.60238500 | -3.06205100 |
| H  | -0.12221100 | -1.40879800 | -1.89520400 |
| H  | 0.84148900  | 2.84854000  | -1.15854000 |
| Br | 4.22138400  | -0.59696300 | 0.04754100  |
| F  | -0.59103500 | -0.13224700 | 1.87043500  |

## 5d

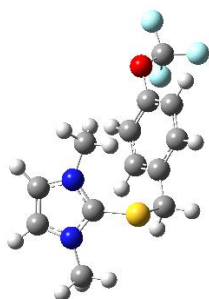

1 1

|   |             |             |             |
|---|-------------|-------------|-------------|
| S | -2.84483600 | -1.59733600 | 0.57962800  |
| N | -3.91879300 | 0.64968800  | -0.60023600 |
| N | -2.47010900 | 1.11069700  | 0.94220600  |
| C | -3.06181700 | 0.09964900  | 0.28154800  |
| C | 0.66230600  | -1.73033000 | 0.68168300  |
| C | -0.18880600 | -1.31163000 | -0.33966500 |
| C | -3.85623900 | 2.01067000  | -0.49775500 |
| H | -4.46029700 | 2.66101400  | -1.10637500 |
| C | 1.84541300  | -1.05978200 | 0.93505800  |
| H | 2.51426900  | -1.37962300 | 1.72279200  |
| C | -2.94891700 | 2.29860700  | 0.46747300  |
| H | -2.61482600 | 3.24641500  | 0.85233300  |
| C | 2.17953100  | 0.03757900  | 0.15701100  |
| C | -1.47205700 | -2.02283700 | -0.60279100 |
| H | -1.38858900 | -3.09947200 | -0.44594000 |
| H | -1.84082400 | -1.85714500 | -1.61302500 |
| C | -4.79655100 | -0.07057100 | -1.51176100 |
| H | -4.47375200 | 0.09210900  | -2.53870000 |
| H | -5.81533900 | 0.28917200  | -1.38449700 |
| H | -4.75291700 | -1.12898400 | -1.27155400 |

|   |             |             |             |
|---|-------------|-------------|-------------|
| C | 0.17336900  | -0.21136300 | -1.11180200 |
| C | 1.35541500  | 0.47054500  | -0.86663000 |
| H | 1.64861900  | 1.32180200  | -1.46628500 |
| C | -1.47074300 | 0.98854800  | 1.99551300  |
| H | -1.48587700 | -0.02886300 | 2.37369800  |
| H | -1.71928300 | 1.68380200  | 2.79413900  |
| H | -0.48481100 | 1.21300200  | 1.59223400  |
| H | 0.40120000  | -2.59218000 | 1.28516700  |
| H | -0.46171000 | 0.10950800  | -1.93021000 |
| O | 3.32526900  | 0.75682700  | 0.45625900  |
| C | 4.46728700  | 0.38959500  | -0.17998700 |
| F | 4.79845600  | -0.87464600 | 0.08130000  |
| F | 5.42674600  | 1.18351200  | 0.24214700  |
| F | 4.35730000  | 0.50417900  | -1.50445200 |

## 6d

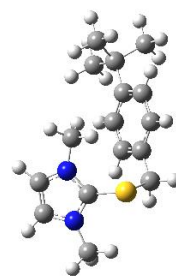

1 1

|   |             |             |             |
|---|-------------|-------------|-------------|
| S | -2.54694900 | -1.54174300 | 0.72757900  |
| N | -3.56789500 | 0.72120800  | -0.46729900 |
| N | -1.92754400 | 1.13964400  | 0.88286900  |
| C | -2.66608600 | 0.14855300  | 0.35366400  |
| C | 0.96100400  | -1.87047500 | 0.51562200  |
| C | 0.02825700  | -1.46589600 | -0.43852800 |
| C | -3.38729100 | 2.07556000  | -0.45810900 |
| H | -4.00146000 | 2.74099300  | -1.03951300 |
| C | 2.19029400  | -1.24737200 | 0.60644100  |
| H | 2.89394500  | -1.59827800 | 1.35101400  |
| C | -2.35922200 | 2.33641700  | 0.38591500  |
| H | -1.90985100 | 3.27131500  | 0.67179800  |
| C | 2.54827400  | -0.19505900 | -0.24471600 |
| C | -1.30393600 | -2.12072300 | -0.53876500 |

|   |             |             |             |   |             |             |             |
|---|-------------|-------------|-------------|---|-------------|-------------|-------------|
| H | -1.26353200 | -3.18747400 | -0.31262800 | S | 2.45524900  | 1.58646200  | -0.02681600 |
| H | -1.75851700 | -1.99809700 | -1.51984300 | N | 2.73277600  | -1.13145400 | -0.39700000 |
| C | -4.59169900 | 0.02933500  | -1.23639900 | N | 1.54415800  | -0.62811000 | 1.34195400  |
| H | -4.38153700 | 0.12838100  | -2.29999100 | C | 2.21813300  | -0.10245400 | 0.30341100  |
| H | -5.56355600 | 0.46321000  | -1.01055100 | C | -0.94126100 | 2.70599800  | 0.07909500  |
| H | -4.58750300 | -1.01931000 | -0.95325100 | C | -0.28897900 | 1.70575200  | -0.64083800 |
| C | 0.37350300  | -0.42881800 | -1.29528600 | C | 2.36933200  | -2.30605000 | 0.19894800  |
| C | 1.61063200  | 0.19648000  | -1.19720500 | H | 2.66675400  | -3.26413000 | -0.19073100 |
| H | 1.84470100  | 0.98980900  | -1.89378200 | C | -2.19067000 | 2.47466200  | 0.62802800  |
| C | -0.82705300 | 0.98756100  | 1.82548400  | H | -2.69722600 | 3.26323500  | 1.16930000  |
| H | -0.91575900 | 0.02091400  | 2.31162000  | C | 1.62633000  | -1.99032500 | 1.28785900  |
| H | -0.89325300 | 1.78191300  | 2.56540700  | H | 1.15263100  | -2.62275700 | 2.01838000  |
| H | 0.12138500  | 1.03915000  | 1.29290300  | C | -2.80123700 | 1.23572500  | 0.48310500  |
| H | 0.72528600  | -2.68708900 | 1.18959100  | C | 1.06731500  | 1.93148800  | -1.21698200 |
| H | -0.31838500 | -0.11379600 | -2.07002000 | H | 1.24596900  | 2.97978900  | -1.45955800 |
| C | 3.92595400  | 0.45022700  | -0.12225700 | H | 1.24403300  | 1.34133500  | -2.11409200 |
| C | 4.09817300  | 1.02003900  | 1.29335800  | C | 3.55750900  | -1.03145900 | -1.59257400 |
| H | 4.00433500  | 0.24978900  | 2.06026000  | H | 2.99197200  | -1.36505200 | -2.46120800 |
| H | 5.08819600  | 1.46810300  | 1.39713700  | H | 4.44027500  | -1.65464200 | -1.46774400 |
| H | 3.35734400  | 1.79628000  | 1.49893700  | H | 3.85971800  | 0.00411300  | -1.72070000 |
| C | 5.00156300  | -0.61674500 | -0.37655900 | C | -0.91355700 | 0.47613200  | -0.80336400 |
| H | 4.90403900  | -1.04241300 | -1.37690700 | C | -2.15681300 | 0.23965600  | -0.23287500 |
| H | 5.99487100  | -0.17135300 | -0.29392300 | C | 0.83080000  | 0.10952100  | 2.37594500  |
| H | 4.94495300  | -1.43403900 | 0.34376200  | H | 1.02391800  | 1.16924200  | 2.24291600  |
| C | 4.12438700  | 1.58486600  | -1.12655100 | H | 1.19008500  | -0.21206600 | 3.35138500  |
| H | 4.05767600  | 1.23441500  | -2.15850800 | H | -0.23612400 | -0.08439200 | 2.28534300  |
| H | 3.39810200  | 2.38883200  | -0.98594400 | H | -0.47207400 | 3.67568400  | 0.20099300  |
| H | 5.11725000  | 2.01695800  | -0.99448900 | H | -0.44252600 | -0.30254000 | -1.39258300 |
|   |             |             |             | H | -3.77706200 | 1.05047800  | 0.91175400  |
|   |             |             |             | C | -2.75627700 | -1.13091500 | -0.36158200 |
|   |             |             |             | F | -2.58547700 | -1.63481200 | -1.58815100 |
|   |             |             |             | F | -4.05503300 | -1.14880500 | -0.08335000 |
|   |             |             |             | F | -2.15244800 | -1.98873100 | 0.49282100  |

**7d**

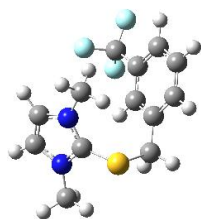

**8d**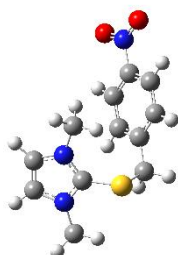

I 1

|   |             |             |             |
|---|-------------|-------------|-------------|
| S | -2.08563400 | -1.58337700 | 0.70924900  |
| N | -3.25073800 | 0.62650100  | -0.45599600 |
| N | -1.68792300 | 1.13522000  | 0.95471500  |
| C | -2.32579100 | 0.10424900  | 0.37214900  |
| C | 1.39941700  | -1.78631000 | 0.45650400  |
| C | 0.45725500  | -1.37728000 | -0.48676200 |
| C | -3.18401700 | 1.98984600  | -0.40023500 |
| H | -3.83441300 | 2.62121400  | -0.98053300 |
| C | 2.61304400  | -1.13314000 | 0.56829800  |
| H | 3.36152400  | -1.43904700 | 1.28589300  |
| C | -2.20625800 | 2.30777100  | 0.48356200  |
| H | -1.84696900 | 3.26721900  | 0.81323900  |
| C | 2.87064400  | -0.06290800 | -0.27137800 |
| C | -0.85921200 | -2.07088800 | -0.59670200 |
| H | -0.77487300 | -3.14409400 | -0.41800800 |
| H | -1.32567400 | -1.92666400 | -1.56909000 |
| C | -4.19507000 | -0.12161700 | -1.27424100 |
| H | -3.93429100 | -0.01834800 | -2.32626400 |
| H | -5.19714400 | 0.26586700  | -1.10399600 |
| H | -4.15616700 | -1.16709900 | -0.98200100 |
| C | 0.75562600  | -0.31020100 | -1.33109100 |
| C | 1.96559100  | 0.35652300  | -1.22799000 |
| H | 2.22184000  | 1.18151700  | -1.87793600 |
| C | -0.61256500 | 1.04775500  | 1.93432200  |
| H | -0.55545800 | 0.02723400  | 2.29964100  |
| H | -0.83303400 | 1.72281600  | 2.75826000  |
| H | 0.33051000  | 1.32279100  | 1.46571200  |
| H | 1.18633100  | -2.62716800 | 1.10622000  |

|   |            |             |             |
|---|------------|-------------|-------------|
| H | 0.04741800 | -0.00756700 | -2.09410100 |
| N | 4.15303500 | 0.64929400  | -0.14632900 |
| O | 4.93698500 | 0.23463300  | 0.67985600  |
| O | 4.32650900 | 1.60479700  | -0.87365200 |

**1e**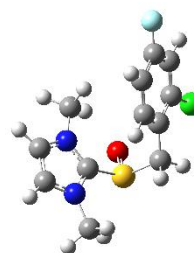

I 1

|    |             |             |             |
|----|-------------|-------------|-------------|
| S  | 1.28524200  | -1.67033500 | 0.09807300  |
| Cl | -2.52930800 | -2.26889000 | 0.28494500  |
| O  | 0.62152000  | -1.92018200 | 1.39215900  |
| N  | 1.69169700  | 0.97127600  | 1.06910000  |
| N  | 3.10688800  | 0.36834200  | -0.45765800 |
| F  | -3.79801900 | 2.55916300  | 0.00721100  |
| C  | 1.99618000  | 0.00228200  | 0.19970300  |
| C  | -1.01740100 | -0.32189100 | -0.87806100 |
| C  | 0.01194500  | -1.33908600 | -1.21000000 |
| H  | 0.59423300  | -1.07620500 | -2.09592900 |
| H  | -0.40711600 | -2.33602500 | -1.35824600 |
| C  | -0.84384900 | 1.00050200  | -1.28925000 |
| H  | 0.03093700  | 1.25898400  | -1.87580700 |
| C  | -2.18795200 | -0.64050400 | -0.18110800 |
| C  | 0.55826500  | 1.01687600  | 1.99560500  |
| H  | -0.26928300 | 1.54066500  | 1.52056500  |
| H  | 0.87716400  | 1.55031100  | 2.88748700  |
| H  | 0.26487600  | 0.00237000  | 2.24677200  |
| C  | 2.61277500  | 1.97672800  | 0.94302700  |
| H  | 2.56804600  | 2.86657900  | 1.54677100  |
| C  | 3.49566400  | 1.60388300  | -0.01431100 |
| H  | 4.36372200  | 2.10641300  | -0.40437100 |
| C  | 3.79761900  | -0.40508500 | -1.48237100 |



|   |             |             |             |
|---|-------------|-------------|-------------|
| H | 3.62975000  | -1.46570900 | -1.30838800 |
| H | 4.86265100  | -0.19909400 | -1.41371900 |
| H | 3.43640100  | -0.12984100 | -2.47219800 |
| C | -3.12870500 | 0.33037300  | 0.12247200  |
| H | -4.03594100 | 0.08195500  | 0.65529900  |
| C | -1.76797000 | 1.98727100  | -1.00125800 |
| H | -1.64159000 | 3.00753600  | -1.33695900 |
| C | -2.89649800 | 1.62868600  | -0.28557800 |

## 2e

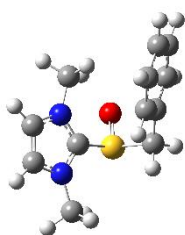

|     |             |             |             |
|-----|-------------|-------------|-------------|
| 1 1 |             |             |             |
| S   | 0.85261000  | -1.71504800 | 0.31228200  |
| O   | 0.18350400  | -1.87475000 | 1.62051200  |
| N   | 1.01720400  | 1.05521400  | 0.94147600  |
| N   | 2.50419100  | 0.38074900  | -0.48367400 |
| C   | 1.41974900  | 0.00936100  | 0.21356900  |
| C   | -1.53051200 | -0.65931200 | -0.76079700 |
| C   | -0.44334000 | -1.64236600 | -1.00839200 |
| H   | 0.10194800  | -1.46739200 | -1.93846700 |
| H   | -0.79411900 | -2.67717200 | -1.00835500 |
| C   | -1.53839000 | 0.56465600  | -1.42879500 |
| H   | -0.77308200 | 0.78472600  | -2.16587500 |
| C   | -2.54639100 | -0.94746000 | 0.14915100  |
| C   | -0.13287400 | 1.12419000  | 1.84522800  |
| H   | -1.00390100 | 1.46682500  | 1.28922800  |
| H   | 0.10971500  | 1.82676000  | 2.63847200  |
| H   | -0.31938100 | 0.13739600  | 2.25692300  |
| C   | 1.84785000  | 2.11235800  | 0.68345600  |
| H   | 1.71460900  | 3.06807700  | 1.15987400  |
| C   | 2.77534000  | 1.69437600  | -0.21107700 |
| H   | 3.60099700  | 2.21552200  | -0.66357800 |

|   |             |             |             |
|---|-------------|-------------|-------------|
| C | 3.27331300  | -0.45694400 | -1.39542800 |
| H | 3.20012600  | -1.49550500 | -1.08035100 |
| H | 4.31443500  | -0.14719500 | -1.35639400 |
| H | 2.89928900  | -0.35109200 | -2.41270300 |
| C | -3.54628700 | -0.01886200 | 0.39377400  |
| H | -4.33579000 | -0.25299900 | 1.09660500  |
| C | -2.54091000 | 1.49044000  | -1.18516500 |
| H | -2.55117600 | 2.42994600  | -1.72351800 |
| C | -3.54354000 | 1.20115800  | -0.26832200 |
| H | -2.55479800 | -1.90001000 | 0.66407700  |
| H | -4.33246900 | 1.91957000  | -0.08437500 |

## 3e

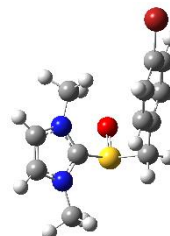

|     |             |             |             |
|-----|-------------|-------------|-------------|
| 1 1 |             |             |             |
| S   | -2.52465900 | 1.49149100  | 0.34387800  |
| O   | -1.92019300 | 1.84084100  | 1.64666900  |
| N   | -1.77884500 | -1.19322000 | 0.92576400  |
| N   | -3.41604300 | -1.01300200 | -0.48307200 |
| C   | -2.50396700 | -0.32199400 | 0.21757300  |
| C   | 0.05804300  | 1.29389900  | -0.76556800 |
| C   | -1.29381700 | 1.86605300  | -0.99088000 |
| H   | -1.76172400 | 1.53299400  | -1.91970100 |
| H   | -1.30416800 | 2.95852500  | -0.97666800 |
| C   | 0.46826200  | 0.15405000  | -1.45503900 |
| H   | -0.18124200 | -0.29659500 | -2.19795800 |
| C   | 0.93155800  | 1.88010800  | 0.14897700  |
| C   | -0.66327500 | -0.90250600 | 1.82885200  |
| H   | 0.27021900  | -0.95217400 | 1.27119800  |
| H   | -0.67006600 | -1.65035800 | 2.61774000  |
| H   | -0.79540700 | 0.09018600  | 2.24713000  |
| C   | -2.22559400 | -2.45792600 | 0.65143200  |

|    |             |             |             |
|----|-------------|-------------|-------------|
| H  | -1.78680100 | -3.32673100 | 1.11068300  |
| C  | -3.24584700 | -2.34787200 | -0.23295300 |
| H  | -3.86263100 | -3.10073800 | -0.69220100 |
| C  | -4.42335500 | -0.45476200 | -1.37681300 |
| H  | -4.68917700 | 0.54549100  | -1.04196200 |
| H  | -5.30696700 | -1.08669400 | -1.34114900 |
| H  | -4.04413900 | -0.41585400 | -2.39692300 |
| C  | 2.18166100  | 1.33129000  | 0.38261100  |
| H  | 2.85712300  | 1.79325000  | 1.08969100  |
| C  | 1.71738800  | -0.40077800 | -1.23154600 |
| H  | 2.03772500  | -1.27410600 | -1.78338100 |
| C  | 2.56562000  | 0.18928000  | -0.30472400 |
| H  | 0.63570000  | 2.77303200  | 0.68514900  |
| Br | 4.26633700  | -0.56315100 | 0.00921600  |

#### 4e

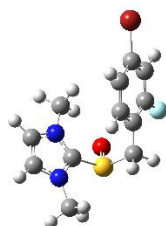

1 1

|   |             |             |             |
|---|-------------|-------------|-------------|
| S | -2.51683800 | 1.42021400  | 0.25774000  |
| O | -1.90867100 | 1.78754400  | 1.55110400  |
| N | -1.90742300 | -1.26404400 | 0.97721100  |
| N | -3.51060000 | -1.08175300 | -0.47012700 |
| C | -2.57757900 | -0.39830200 | 0.20975700  |
| C | 0.06017800  | 1.07538700  | -0.84830700 |
| C | -1.27199600 | 1.67866200  | -1.09420700 |
| H | -1.75080100 | 1.30395800  | -2.00110700 |
| H | -1.23924900 | 2.76872100  | -1.14455400 |
| C | 0.41806700  | -0.16503300 | -1.37513800 |
| H | -0.28053000 | -0.69217600 | -2.01588000 |
| C | 1.01427400  | 1.74001400  | -0.08470200 |
| C | -0.79516700 | -0.97959900 | 1.88707500  |
| H | 0.14475200  | -1.11983900 | 1.35611600  |
| H | -0.86147600 | -1.67306300 | 2.72157900  |

|    |             |             |             |
|----|-------------|-------------|-------------|
| H  | -0.87794800 | 0.04388400  | 2.23889100  |
| C  | -2.41067600 | -2.51916200 | 0.76132100  |
| H  | -2.02271900 | -3.38208000 | 1.27435500  |
| C  | -3.40980500 | -2.40807900 | -0.14664700 |
| H  | -4.05550100 | -3.15412100 | -0.57642700 |
| C  | -4.47670300 | -0.52340200 | -1.40832500 |
| H  | -4.69525100 | 0.50580100  | -1.13191100 |
| H  | -5.39205300 | -1.10684500 | -1.35219600 |
| H  | -4.08334400 | -0.55957100 | -2.42318900 |
| C  | 2.25904900  | 1.20708400  | 0.18431600  |
| H  | 2.96410000  | 1.76858500  | 0.78128900  |
| C  | 1.65704100  | -0.72861200 | -1.12826000 |
| H  | 1.92417400  | -1.68359300 | -1.55865400 |
| C  | 2.56753100  | -0.03818200 | -0.33759500 |
| Br | 4.25525600  | -0.79512900 | 0.01573000  |
| F  | 0.72794600  | 2.95133400  | 0.38701500  |

#### 5e

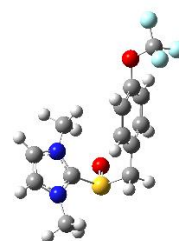

1 1

|   |             |             |             |
|---|-------------|-------------|-------------|
| S | -2.77946000 | 1.55104300  | 0.12526100  |
| O | -2.28169200 | 1.98518600  | 1.44733900  |
| N | -2.27970700 | -1.10630500 | 1.01590600  |
| N | -3.75051200 | -0.96413600 | -0.56977000 |
| C | -2.86839600 | -0.26484000 | 0.16027100  |
| C | -0.11654800 | 1.11487000  | -0.68664800 |
| C | -1.40453000 | 1.72856400  | -1.10325400 |
| H | -1.79692200 | 1.32925300  | -2.04079100 |
| H | -1.34908700 | 2.81602200  | -1.19327100 |
| C | 0.29193500  | -0.10352300 | -1.22717700 |
| H | -0.30941300 | -0.59088200 | -1.98684300 |
| C | 0.69034400  | 1.74454100  | 0.25994800  |
| C | -1.24410400 | -0.79734100 | 2.00414400  |

|   |             |             |             |
|---|-------------|-------------|-------------|
| H | -0.26442800 | -0.94649500 | 1.55388100  |
| H | -1.37655300 | -1.47106100 | 2.84684700  |
| H | -1.35459100 | 0.23412900  | 2.32316600  |
| C | -2.78210500 | -2.36278100 | 0.80798500  |
| H | -2.45264700 | -3.20858400 | 1.38626100  |
| C | -3.69815800 | -2.27698000 | -0.18635800 |
| H | -4.31569100 | -3.03230900 | -0.64058100 |
| C | -4.62285200 | -0.43481800 | -1.61113600 |
| H | -4.85148300 | 0.60676100  | -1.39635400 |
| H | -5.54693000 | -1.00704300 | -1.61314900 |
| H | -4.14189600 | -0.51600300 | -2.58480600 |
| C | 1.87945800  | 1.16317400  | 0.66701000  |
| H | 2.51343300  | 1.64214300  | 1.40097400  |
| C | 1.48097500  | -0.69071000 | -0.82899200 |
| H | 1.81466600  | -1.62890100 | -1.25154400 |
| C | 2.26299500  | -0.04837300 | 0.11749100  |
| O | 3.41595300  | -0.66579900 | 0.57290200  |
| C | 4.56794200  | -0.38841000 | -0.09146100 |
| F | 4.86012300  | 0.91103100  | -0.05981300 |
| F | 5.53264800  | -1.06321400 | 0.49347600  |
| F | 4.49949200  | -0.74780800 | -1.37443800 |
| H | 0.38824000  | 2.69393900  | 0.68318200  |

**6e**

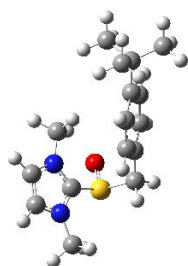

1 1

|   |             |             |             |
|---|-------------|-------------|-------------|
| S | 2.50744200  | -1.51620100 | 0.30530000  |
| O | 1.92129200  | -1.88481300 | 1.61173500  |
| N | 1.76976000  | 1.15720600  | 0.93549000  |
| N | 3.40471800  | 1.00074100  | -0.47828100 |
| C | 2.49347900  | 0.29835900  | 0.21184000  |
| C | -0.08383800 | -1.26519700 | -0.78190100 |

|   |             |             |             |
|---|-------------|-------------|-------------|
| C | 1.25823400  | -1.85340200 | -1.02141600 |
| H | 1.72686100  | -1.51316900 | -1.94771000 |
| H | 1.25401800  | -2.94614700 | -1.02305900 |
| C | -0.48112400 | -0.10566400 | -1.43891400 |
| H | 0.17669900  | 0.35863000  | -2.16700000 |
| C | -0.97296900 | -1.85799000 | 0.11393100  |
| C | 0.65051600  | 0.84876700  | 1.82755000  |
| H | -0.27812300 | 0.88457000  | 1.26020900  |
| H | 0.64144300  | 1.59426400  | 2.61872300  |
| H | 0.79257500  | -0.14394100 | 2.24292700  |
| C | 2.21650100  | 2.42627100  | 0.68237600  |
| H | 1.77878200  | 3.28711200  | 1.15706700  |
| C | 3.23545600  | 2.33134100  | -0.20516200 |
| H | 3.85194900  | 3.09159900  | -0.65228000 |
| C | 4.40773900  | 0.45664300  | -1.38477700 |
| H | 4.67190500  | -0.55001600 | -1.06834900 |
| H | 5.29285600  | 1.08600300  | -1.34126000 |
| H | 4.02471400  | 0.43579800  | -2.40400000 |
| C | -2.21484200 | -1.29504400 | 0.34219000  |
| H | -2.88303600 | -1.78724500 | 1.03763200  |
| C | -1.73064400 | 0.45119800  | -1.20520400 |
| H | -2.00961400 | 1.34162200  | -1.75163200 |
| C | -2.62788900 | -0.12821600 | -0.30851500 |
| H | -0.69191100 | -2.76643900 | 0.63253000  |
| C | -4.01918600 | 0.44134500  | -0.04513600 |
| C | -5.07077100 | -0.60603400 | -0.44196500 |
| H | -4.96770800 | -1.52706400 | 0.13331500  |
| H | -6.07325700 | -0.21350700 | -0.26112100 |
| H | -4.99290300 | -0.85963100 | -1.50076000 |
| C | -4.16179500 | 0.76605500  | 1.44904100  |
| H | -5.16096000 | 1.15614900  | 1.65178800  |
| H | -4.01937500 | -0.11510600 | 2.07621700  |
| H | -3.43856000 | 1.52403700  | 1.75894900  |
| C | -4.28325500 | 1.71705600  | -0.84410200 |
| H | -3.57832300 | 2.51281900  | -0.59202500 |
| H | -4.23820900 | 1.54245500  | -1.92103600 |

H -5.28426100 2.08636800 -0.61729400

### 7e

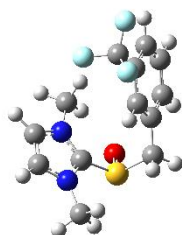

1 1

S -2.51496700 1.22618200 -0.32995500  
O -2.39159700 2.12168800 0.83880000  
N -1.34691000 -0.78623000 1.31367700  
N -2.47292200 -1.55823400 -0.36972500  
C -2.01914900 -0.43783500 0.21212700  
C 0.23948300 1.52697900 -0.81256500  
C -1.09317800 1.56011400 -1.47036800  
H -1.19653400 0.84107800 -2.28560100  
H -1.35767800 2.54909400 -1.85103000  
C 1.02462700 0.38210400 -0.88950600  
H 0.69590900 -0.46982400 -1.47388100  
C 0.70596300 2.62643900 -0.09266100  
C -0.66835700 0.09514000 2.26619600  
H 0.38228100 0.17279600 1.99333700  
H -0.76606000 -0.34489800 3.25544800  
H -1.13587900 1.07398100 2.23995500  
C -1.35489000 -2.15138500 1.41671400  
H -0.86478800 -2.66197200 2.22749600  
C -2.05441300 -2.63612200 0.36300400  
H -2.29072400 -3.64760400 0.08153600  
C -3.26971900 -1.63853300 -1.58791900  
H -3.86431500 -0.73355300 -1.69214600  
H -3.93727700 -2.49273600 -1.50971200  
H -2.62304800 -1.76061000 -2.45566500  
C 1.93734400 2.57422300 0.53991600  
H 2.29951800 3.43599700 1.08529800  
C 2.24991000 0.33009800 -0.24239100  
C 2.71196400 1.42476100 0.47394000

H 0.10607300 3.52593300 -0.03367700

H 3.67581100 1.38299900 0.96356900

C 3.03451700 -0.94988900 -0.28813400

F 2.98351500 -1.51961900 -1.49651600

F 2.51903300 -1.84708900 0.58196400

F 4.31113800 -0.77645000 0.03523800

### 8e

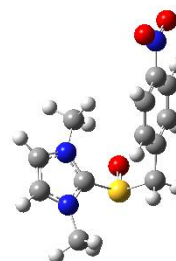

1 1

S 2.07706500 -1.56075800 0.27069800  
O 1.44398500 -1.93730700 1.55096700  
N 1.51038200 1.13479700 0.99566500  
N 3.12566900 0.92021200 -0.43389900  
C 2.17101900 0.25591000 0.23512700  
C -0.48707000 -1.17598600 -0.82781300  
C 0.83879900 -1.79821700 -1.08542800  
H 1.32296300 -1.43491100 -1.99403500  
H 0.79272500 -2.88861200 -1.13529500  
C -0.83856300 0.01607200 -1.46174900  
H -0.16478900 0.46990600 -2.17974400  
C -1.38339500 -1.77525900 0.05671000  
C 0.38409100 0.87241200 1.89423900  
H -0.54755000 1.03039500 1.35432200  
H 0.45430900 1.56537500 2.72877100  
H 0.44283800 -0.15184500 2.24813300  
C 2.04144600 2.37914500 0.78644700  
H 1.66510200 3.24984800 1.29516900  
C 3.04796800 2.24783900 -0.11088800  
H 3.71256700 2.98105400 -0.53400600  
C 4.09096500 0.34484600 -1.36324900  
H 4.29092500 -0.68746600 -1.08456300

|   |             |             |             |
|---|-------------|-------------|-------------|
| H | 5.01492400  | 0.91363200  | -1.29910700 |
| H | 3.70718900  | 0.38735600  | -2.38150300 |
| C | -2.60883800 | -1.18560600 | 0.31708200  |
| H | -3.32233600 | -1.63328900 | 0.99470900  |
| C | -2.06061000 | 0.61388000  | -1.21007300 |
| H | -2.36194500 | 1.52958500  | -1.69925700 |
| C | -2.92182000 | 0.00390200  | -0.31486800 |
| H | -1.12416000 | -2.70665300 | 0.54303600  |
| N | -4.21889800 | 0.64286800  | -0.03283100 |
| O | -4.96786700 | 0.06259300  | 0.72226000  |
| O | -4.43609400 | 1.70833500  | -0.57117300 |

### 1f

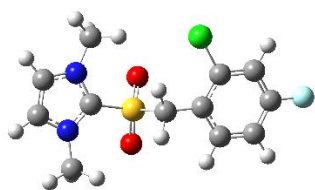

1 1

|    |             |             |             |
|----|-------------|-------------|-------------|
| S  | 0.79793500  | -0.56916800 | 0.57850400  |
| Cl | -1.65427600 | 2.37272500  | -0.53419900 |
| O  | 0.87727100  | -1.97680800 | 0.85391300  |
| O  | 0.43349200  | 0.38857500  | 1.58113600  |
| N  | 3.44332500  | -0.92129000 | -0.33564900 |
| N  | 2.98194300  | 1.14362000  | 0.15519600  |
| F  | -5.60585600 | -0.54653800 | 0.39175200  |
| C  | -1.63349600 | -0.35879900 | -0.57068400 |
| C  | 2.47543800  | -0.09552300 | 0.08749200  |
| C  | -0.18257200 | -0.31340800 | -0.91786600 |
| H  | 0.11402100  | 0.65147700  | -1.32855100 |
| H  | 0.11114000  | -1.11563600 | -1.59463300 |
| C  | 3.36964100  | -2.37173100 | -0.53078100 |
| H  | 3.24037100  | -2.86621400 | 0.42747000  |
| H  | 4.30021300  | -2.68381700 | -0.99582000 |
| H  | 2.53606500  | -2.62160200 | -1.17985700 |
| C  | 4.29014800  | 1.09967600  | -0.22854300 |
| H  | 4.90927400  | 1.97964000  | -0.25117400 |
| C  | 4.57877500  | -0.19107900 | -0.53494000 |

|   |             |             |             |
|---|-------------|-------------|-------------|
| H | 5.49552200  | -0.64148400 | -0.87370500 |
| C | -2.37946700 | 0.80261000  | -0.36251300 |
| C | -2.28051100 | -1.58723700 | -0.44002900 |
| H | -1.71770500 | -2.49925500 | -0.59606400 |
| C | -3.72243300 | 0.74921800  | -0.04175400 |
| H | -4.30262100 | 1.64829300  | 0.10985800  |
| C | -4.31679700 | -0.49205000 | 0.08117600  |
| C | -3.61971400 | -1.66947400 | -0.11412400 |
| H | -4.12488800 | -2.62010200 | -0.01412800 |
| C | 2.30954700  | 2.36393600  | 0.60975900  |
| H | 1.31313000  | 2.42723200  | 0.18385600  |
| H | 2.90716400  | 3.20825300  | 0.27803500  |
| H | 2.23239700  | 2.35513800  | 1.69389800  |

### 2f

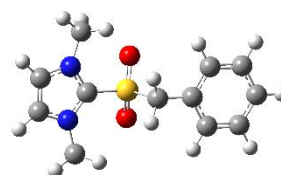

1 1

|   |             |             |             |
|---|-------------|-------------|-------------|
| S | 0.22775600  | 0.00012600  | 0.59608700  |
| O | 0.07145900  | -1.25758200 | 1.26979300  |
| O | 0.07159100  | 1.25806000  | 1.26938200  |
| N | 2.71220700  | -1.08553000 | -0.17457500 |
| N | 2.71231100  | 1.08537900  | -0.17475100 |
| C | -2.19142600 | -0.00007700 | -0.59507900 |
| C | 1.95301200  | -0.00002900 | 0.03316300  |
| C | -0.73129900 | -0.00003200 | -0.92973500 |
| H | -0.42497800 | 0.89296200  | -1.47605000 |
| H | -0.42480400 | -0.89300500 | -1.47598400 |
| C | 2.32810100  | -2.49193300 | -0.03057800 |
| H | 2.13508800  | -2.71540500 | 1.01451600  |
| H | 3.15257800  | -3.09344900 | -0.40216300 |
| H | 1.43545500  | -2.69952500 | -0.61290700 |
| C | 3.96894200  | 0.67845900  | -0.51741100 |
| H | 4.75873500  | 1.37811100  | -0.72886300 |
| C | 3.96883900  | -0.67878600 | -0.51746200 |

|   |             |             |             |
|---|-------------|-------------|-------------|
| H | 4.75853700  | -1.37855200 | -0.72888300 |
| C | -2.87094500 | 1.20422900  | -0.43531300 |
| C | -2.87093100 | -1.20432700 | -0.43499600 |
| H | -2.34636400 | -2.14498000 | -0.55348400 |
| C | -4.22115300 | 1.20233600  | -0.12832600 |
| H | -4.74772600 | 2.14074300  | -0.01141300 |
| C | -4.89626100 | 0.00001800  | 0.02602500  |
| C | -4.22114000 | -1.20234000 | -0.12802600 |
| H | -4.74773000 | -2.14070800 | -0.01088800 |
| C | 2.32850400  | 2.49182200  | -0.03044600 |
| H | 1.43434900  | 2.69914000  | -0.61051100 |
| H | 3.15201100  | 3.09322200  | -0.40437600 |
| H | 2.13814500  | 2.71575700  | 1.01505300  |
| H | -5.95248500 | 0.00002800  | 0.26364500  |
| H | -2.34638600 | 2.14484300  | -0.55409300 |

**3f**

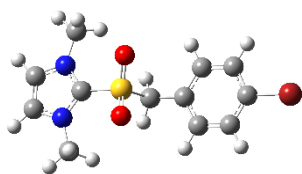

1 1

|   |             |             |             |
|---|-------------|-------------|-------------|
| S | 1.58100100  | -0.00002300 | 0.55634300  |
| O | 1.39520300  | -1.25806600 | 1.22188800  |
| O | 1.39514700  | 1.25804000  | 1.22182100  |
| N | 4.09429200  | -1.08560100 | -0.11085600 |
| N | 4.09419000  | 1.08565900  | -0.11099200 |
| C | -0.79022200 | -0.00008300 | -0.72287200 |
| C | 3.32701800  | -0.00000100 | 0.06544300  |
| C | 0.67927200  | -0.00005500 | -1.00609300 |
| H | 1.00501400  | 0.89276900  | -1.54116300 |
| H | 1.00511100  | -0.89280800 | -1.54122100 |
| C | 3.70563100  | -2.49234100 | 0.01794800  |
| H | 3.46701900  | -2.71468000 | 1.05382000  |
| H | 4.54643100  | -3.09334500 | -0.31593500 |
| H | 2.84007800  | -2.70186300 | -0.60330600 |
| C | 5.36368000  | 0.67875800  | -0.40161900 |

|    |             |             |             |
|----|-------------|-------------|-------------|
| H  | 6.16157900  | 1.37840100  | -0.58024400 |
| C  | 5.36372500  | -0.67861000 | -0.40162700 |
| H  | 6.16168200  | -1.37820200 | -0.58019300 |
| C  | -1.47887200 | 1.20155300  | -0.58432800 |
| C  | -1.47891300 | -1.20166400 | -0.58422800 |
| H  | -0.95664300 | -2.14562600 | -0.68331100 |
| C  | -2.83723700 | 1.20658800  | -0.32305400 |
| H  | -3.37211100 | 2.14079400  | -0.22277300 |
| C  | -3.50833900 | 0.00000300  | -0.19326000 |
| C  | -2.83727800 | -1.20662000 | -0.32296600 |
| H  | -3.37221300 | -2.14078400 | -0.22262700 |
| C  | 3.70548600  | 2.49235100  | 0.01807100  |
| H  | 2.83861800  | 2.70148100  | -0.60145100 |
| H  | 4.54547500  | 3.09343800  | -0.31771400 |
| H  | 3.46892300  | 2.71500500  | 1.05435800  |
| H  | -0.95656700 | 2.14547300  | -0.68351500 |
| Br | -5.36012300 | 0.00002400  | 0.15767300  |

**4f**

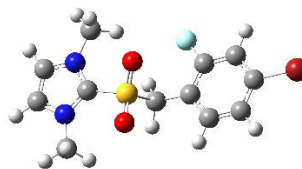

1 1

|   |             |             |             |
|---|-------------|-------------|-------------|
| S | -1.64501100 | -0.48833400 | 0.54826200  |
| O | -1.22450300 | 0.51532800  | 1.48205600  |
| O | -1.73072000 | -1.87834100 | 0.89862100  |
| N | -3.79805700 | 1.24922700  | 0.08996100  |
| N | -4.34421600 | -0.83338500 | -0.19910400 |
| C | 0.73675700  | -0.27710400 | -0.70551000 |
| C | -3.33259100 | -0.00778100 | 0.10401800  |
| C | -0.72382800 | -0.31900200 | -1.00000300 |
| H | -1.01027700 | -1.17889800 | -1.60456200 |
| H | -1.07083300 | 0.60171100  | -1.46941000 |
| C | -3.06601400 | 2.47930100  | 0.40525800  |
| H | -2.91552700 | 2.54856500  | 1.47936300  |

|    |             |             |             |
|----|-------------|-------------|-------------|
| H  | -3.66329300 | 3.31425900  | 0.05024900  |
| H  | -2.09967100 | 2.48356700  | -0.08941600 |
| C  | -5.46667200 | -0.08465200 | -0.40416600 |
| H  | -6.41257000 | -0.53103900 | -0.65726800 |
| C  | -5.12502800 | 1.21704000  | -0.22445000 |
| H  | -5.71854900 | 2.11218200  | -0.29247600 |
| C  | 1.50421600  | -1.43156200 | -0.57218900 |
| C  | 1.37920900  | 0.94343800  | -0.54822300 |
| C  | 2.85756700  | -1.36113000 | -0.29982200 |
| H  | 3.44451600  | -2.26316200 | -0.20203900 |
| C  | 3.45764300  | -0.11764200 | -0.15650100 |
| C  | 2.72519500  | 1.05239100  | -0.28277700 |
| H  | 3.17994900  | 2.02725600  | -0.17879500 |
| C  | -4.32315300 | -2.29705300 | -0.27238300 |
| H  | -3.52902600 | -2.62851000 | -0.93407800 |
| H  | -5.28414600 | -2.61538200 | -0.66578200 |
| H  | -4.16299700 | -2.71314200 | 0.71798500  |
| H  | 1.03476900  | -2.40121200 | -0.68556500 |
| Br | 5.30051900  | -0.00947600 | 0.20980500  |
| F  | 0.65639800  | 2.06717400  | -0.68050000 |

## 5f

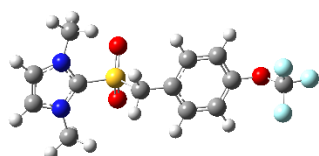

1 1

|   |             |             |             |
|---|-------------|-------------|-------------|
| S | 1.92836000  | 0.00036700  | 0.63406700  |
| O | 1.80368600  | -1.25740600 | 1.31390000  |
| O | 1.80421200  | 1.25879300  | 1.31275000  |
| N | 4.36788400  | -1.08620500 | -0.26285400 |
| N | 4.36841600  | 1.08527400  | -0.26326600 |
| C | -0.55208600 | 0.00029700  | -0.42081200 |
| C | 3.62027400  | -0.00024500 | -0.01751800 |
| C | 0.88655100  | -0.00010500 | -0.83760900 |
| H | 1.16055300  | 0.89222100  | -1.40154300 |
| H | 1.16033600  | -0.89297100 | -1.40079700 |

|   |             |             |             |
|---|-------------|-------------|-------------|
| C | 3.99223500  | -2.49297800 | -0.09932000 |
| H | 3.84915300  | -2.71542700 | 0.95398500  |
| H | 4.79891000  | -3.09410800 | -0.50861200 |
| H | 3.07364600  | -2.70218700 | -0.63922400 |
| C | 5.60572500  | 0.67790000  | -0.66866600 |
| H | 6.38419500  | 1.37723400  | -0.91967900 |
| C | 5.60539000  | -0.67959000 | -0.66843800 |
| H | 6.38352100  | -1.37940600 | -0.91915500 |
| C | -1.22135300 | 1.20401900  | -0.21886700 |
| C | -1.22188700 | -1.20294200 | -0.21787600 |
| C | -2.54969900 | 1.20884300  | 0.16620300  |
| H | -3.08400700 | 2.13514000  | 0.32656100  |
| C | -3.20074600 | 0.00120400  | 0.34892700  |
| C | -2.55022600 | -1.20688800 | 0.16722900  |
| H | -3.08487300 | -2.13284200 | 0.32840000  |
| C | 3.99380900  | 2.49227200  | -0.09938000 |
| H | 3.07285600  | 2.70123200  | -0.63526100 |
| H | 4.79880900  | 3.09285900  | -0.51276700 |
| H | 3.85544200  | 2.71571100  | 0.95437300  |
| H | -0.70653900 | 2.14599600  | -0.36263700 |
| H | -0.70746700 | -2.14526500 | -0.36080000 |
| O | -4.51093400 | 0.00193900  | 0.79792600  |
| C | -5.48477600 | -0.00041200 | -0.14426700 |
| F | -5.41665800 | -1.07591500 | -0.93193400 |
| F | -6.64205500 | 0.00115800  | 0.48037800  |
| F | -5.41655100 | 1.07115600  | -0.93725900 |

## 6f

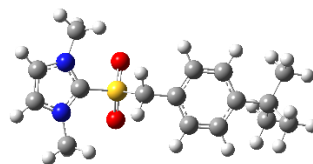

1 1

|   |            |             |            |
|---|------------|-------------|------------|
| S | 1.54841800 | 0.00451300  | 0.55709300 |
| O | 1.36187500 | -1.25376400 | 1.22276900 |
| O | 1.37528400 | 1.26130600  | 1.22908200 |

|   |             |             |             |
|---|-------------|-------------|-------------|
| N | 4.05621100  | -1.09216200 | -0.12156400 |
| N | 4.06708200  | 1.07827100  | -0.11757200 |
| C | -0.82134400 | 0.01926500  | -0.72531000 |
| C | 3.29548100  | -0.00342000 | 0.06155700  |
| C | 0.64773100  | 0.01326900  | -1.00510800 |
| H | 0.98053700  | 0.90679300  | -1.53511100 |
| H | 0.97287500  | -0.87972500 | -1.54091700 |
| C | 3.65964500  | -2.49649500 | 0.00595300  |
| H | 3.43015200  | -2.72123800 | 1.04337200  |
| H | 4.49273900  | -3.10193300 | -0.33918000 |
| H | 2.78573300  | -2.69757700 | -0.60625500 |
| C | 5.33336800  | 0.66576900  | -0.41625800 |
| H | 6.13349400  | 1.36190300  | -0.59824500 |
| C | 5.32656700  | -0.69124900 | -0.41873500 |
| H | 6.11968400  | -1.39468400 | -0.60331300 |
| C | -1.51009100 | 1.21751800  | -0.59176100 |
| C | -1.51945900 | -1.17736400 | -0.58303800 |
| H | -1.00193000 | -2.12490800 | -0.67825900 |
| C | -2.87121800 | 1.21925900  | -0.33171000 |
| H | -3.37604000 | 2.17063800  | -0.24091900 |
| C | -3.58622000 | 0.03205900  | -0.19007800 |
| C | -2.87544100 | -1.16435800 | -0.32386800 |
| H | -3.39176500 | -2.11072100 | -0.22554900 |
| C | 3.68449000  | 2.48602500  | 0.01500400  |
| H | 2.81200100  | 2.69771600  | -0.59563300 |
| H | 4.52318800  | 3.08438700  | -0.32888300 |
| H | 3.45814600  | 2.70950200  | 1.05339900  |
| H | -0.98670400 | 2.16119700  | -0.69385600 |
| C | -5.08446800 | -0.00130700 | 0.09507600  |
| C | -5.32760200 | -0.74300900 | 1.41793400  |
| H | -6.39743300 | -0.77795200 | 1.63303400  |
| H | -4.96416200 | -1.77109300 | 1.38354100  |
| H | -4.83168100 | -0.23785800 | 2.24900400  |
| C | -5.68284100 | 1.40019400  | 0.21034900  |
| H | -5.57047400 | 1.97063400  | -0.71413100 |
| H | -6.75130800 | 1.32195500  | 0.41627500  |

|   |             |             |             |
|---|-------------|-------------|-------------|
| H | -5.23462600 | 1.97041500  | 1.02681400  |
| C | -5.79782600 | -0.74144700 | -1.04618700 |
| H | -5.44809800 | -1.76979600 | -1.14841800 |
| H | -6.87184900 | -0.77550800 | -0.85291700 |
| H | -5.64212500 | -0.23572100 | -2.00112500 |

## 7f

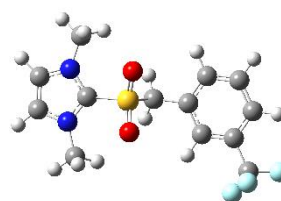

|     |             |             |             |
|-----|-------------|-------------|-------------|
| 1 1 |             |             |             |
| S   | -1.32997600 | 0.26369700  | 0.57908400  |
| O   | -1.52666900 | 1.52575600  | 1.23353300  |
| O   | -0.81788200 | -0.88851500 | 1.26352200  |
| N   | -4.02719200 | 0.58825100  | -0.16701500 |
| N   | -3.40169600 | -1.49153200 | -0.16397700 |
| C   | 1.00229800  | 0.87740000  | -0.62173100 |
| C   | -2.98494100 | -0.23189600 | 0.03169400  |
| C   | -0.41373700 | 0.51542900  | -0.95303500 |
| H   | -0.48609500 | -0.42046200 | -1.50825800 |
| H   | -0.93610300 | 1.30738900  | -1.49058700 |
| C   | -4.06450900 | 2.04653900  | -0.02916700 |
| H   | -3.93802900 | 2.32072500  | 1.01408500  |
| H   | -5.03000300 | 2.38261500  | -0.39589400 |
| H   | -3.27380800 | 2.50044500  | -0.61873800 |
| C   | -4.72585000 | -1.46519800 | -0.49059500 |
| H   | -5.28332100 | -2.36369700 | -0.69073700 |
| C   | -5.11696000 | -0.16514200 | -0.49230800 |
| H   | -6.07750400 | 0.27612500  | -0.69415800 |
| C   | 1.95726800  | -0.12375700 | -0.48683200 |
| C   | 1.36508700  | 2.20804800  | -0.43888700 |
| H   | 0.62479700  | 2.99248700  | -0.53935700 |
| C   | 3.26576400  | 0.20940600  | -0.18400900 |
| C   | 3.62933700  | 1.53709200  | -0.00615700 |
| C   | 2.67626300  | 2.53431200  | -0.13472600 |



|   |             |             |             |
|---|-------------|-------------|-------------|
| H | 2.95790200  | 3.57055600  | -0.00196800 |
| C | -2.62803600 | -2.72803300 | -0.02231800 |
| H | -1.71896300 | -2.67328300 | -0.61363500 |
| H | -3.24825800 | -3.54243200 | -0.38518000 |
| H | -2.36962400 | -2.88269300 | 1.02112900  |
| H | 4.65671700  | 1.78908600  | 0.22215400  |
| H | 1.68996700  | -1.16307600 | -0.62648400 |
| C | 4.29438500  | -0.87379100 | -0.00996900 |
| F | 4.45657800  | -1.18310600 | 1.28302600  |
| F | 3.93916400  | -1.99821600 | -0.64443700 |
| F | 5.48562900  | -0.49982800 | -0.48180800 |

**8f**

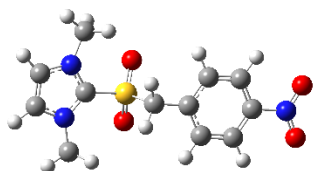

1 1

|   |             |             |             |
|---|-------------|-------------|-------------|
| S | 1.16249100  | -0.00015700 | 0.56001200  |
| O | 0.97690200  | -1.25884300 | 1.22295500  |
| O | 0.97681100  | 1.25802500  | 1.22388500  |
| N | 3.66908000  | -1.08604100 | -0.12053800 |
| N | 3.66888200  | 1.08617800  | -0.12075800 |
| C | -1.21995600 | 0.00026000  | -0.70047600 |
| C | 2.90194800  | 0.00001300  | 0.05564000  |
| C | 0.25048600  | 0.00039200  | -0.99503700 |
| H | 0.56825000  | 0.89340100  | -1.53403200 |
| H | 0.56829400  | -0.89221700 | -1.53466500 |
| C | 3.28231600  | -2.49354300 | 0.00978000  |
| H | 3.05289900  | -2.71727800 | 1.04749400  |
| H | 4.12079600  | -3.09344500 | -0.33173600 |
| H | 2.41212400  | -2.70316600 | -0.60485400 |
| C | 4.93747700  | 0.67905800  | -0.41242100 |
| H | 5.73544200  | 1.37852800  | -0.59187500 |
| C | 4.93760700  | -0.67874900 | -0.41227000 |
| H | 5.73571200  | -1.37811300 | -0.59152200 |
| C | -1.90159600 | 1.20598700  | -0.55850200 |

|   |             |             |             |
|---|-------------|-------------|-------------|
| C | -1.90158400 | -1.20559600 | -0.55959000 |
| H | -1.37564000 | -2.14631300 | -0.66369900 |
| C | -3.25775800 | 1.21148100  | -0.28762900 |
| H | -3.81369900 | 2.13169100  | -0.17798500 |
| C | -3.91059800 | 0.00000500  | -0.15763300 |
| C | -3.25775600 | -1.21134300 | -0.28873900 |
| H | -3.81369100 | -2.13166300 | -0.17999300 |
| C | 3.28163400  | 2.49360100  | 0.00890800  |
| H | 2.41417800  | 2.70371800  | -0.60949000 |
| H | 4.12159000  | 3.09370200  | -0.32859600 |
| H | 3.04777400  | 2.71664000  | 1.04575100  |
| H | -1.37566500 | 2.14679900  | -0.66180700 |
| N | -5.35604800 | -0.00012300 | 0.12801000  |
| O | -5.89716700 | -1.07977900 | 0.23468000  |
| O | -5.89716400 | 1.07943700  | 0.23568400  |

### 1,3-dimethyl-imidazol-2-ylidene-singlet

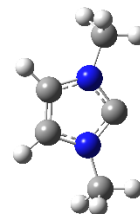

0 1

|   |             |             |             |
|---|-------------|-------------|-------------|
| C | 0.00000900  | -1.20612300 | 0.67459700  |
| C | 0.00000900  | -1.20612300 | -0.67459700 |
| C | -0.00001200 | 0.97237600  | 0.00000000  |
| N | -0.00000200 | 0.11981700  | 1.05648900  |
| C | -0.00000200 | 0.56984900  | 2.42760000  |
| H | 0.88883600  | 0.21525000  | 2.95256200  |
| H | -0.00003600 | 1.65634100  | 2.41613700  |
| H | -0.88880700 | 0.21519300  | 2.95257800  |
| N | -0.00000200 | 0.11981700  | -1.05648900 |
| C | -0.00000200 | 0.56984900  | -2.42760000 |
| H | -0.00003600 | 1.65634100  | -2.41613700 |
| H | 0.88883600  | 0.21525000  | -2.95256200 |

|   |             |             |             |
|---|-------------|-------------|-------------|
| H | -0.88880700 | 0.21519300  | -2.95257800 |
| H | 0.00001600  | -2.02498400 | 1.37405700  |
| H | 0.00001600  | -2.02498400 | -1.37405700 |

### frag-1 (1a, 1b and 1c)

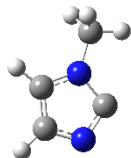

-1 1

|   |             |             |             |
|---|-------------|-------------|-------------|
| C | 0.21374800  | 1.08191900  | 0.00007500  |
| C | 1.48239000  | 0.57244600  | 0.00021200  |
| C | 0.16031700  | -1.20101400 | -0.00010300 |
| N | -0.59693800 | -0.03124700 | -0.00004000 |
| C | -2.02529400 | -0.01251000 | -0.00006700 |
| H | -2.43277900 | 0.48914500  | -0.88768700 |
| H | -2.35529900 | -1.05209300 | -0.00065600 |
| H | -2.43286700 | 0.48812900  | 0.88809300  |
| N | 1.45180400  | -0.79713200 | -0.00008000 |
| H | -0.16120800 | 2.09539300  | -0.00002400 |
| H | 2.41112600  | 1.13303000  | 0.00039600  |

### frag-2 (1a and 1d)

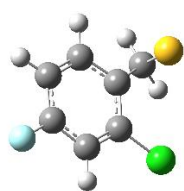

1 1

|   |             |             |             |
|---|-------------|-------------|-------------|
| S | 1.93990000  | -1.09688600 | -0.79195700 |
| C | 1.86067800  | -0.82725000 | 0.95812100  |
| H | 2.36404100  | 0.05618500  | 1.33181900  |
| C | 0.52014400  | -0.56287800 | 0.30164700  |
| C | -0.46828300 | -1.61888200 | 0.35069600  |
| C | 0.04822100  | 0.80060200  | 0.08651300  |
| C | -1.78807100 | -1.36858600 | 0.16417000  |
| H | -0.11009200 | -2.62559200 | 0.52572700  |

|    |             |             |             |
|----|-------------|-------------|-------------|
| C  | -1.28427800 | 1.04504700  | -0.08850200 |
| C  | -2.16815600 | -0.03559700 | -0.05118900 |
| H  | -2.54119200 | -2.14456600 | 0.17806700  |
| H  | -1.66673000 | 2.04264500  | -0.25642500 |
| H  | 1.91082000  | -1.70485100 | 1.59145500  |
| Cl | 1.14973600  | 2.08078700  | 0.06018700  |
| F  | -3.42914200 | 0.21758100  | -0.22791700 |

### frag-2 (1b and 1e)

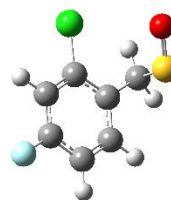

1 1

|    |             |             |             |
|----|-------------|-------------|-------------|
| S  | -1.91071800 | -1.09145100 | -0.57739700 |
| C  | -1.55338800 | -0.79846600 | 1.16627800  |
| H  | -1.64080500 | -1.70346200 | 1.76054300  |
| C  | -0.17568200 | -0.52449500 | 0.64955500  |
| C  | 0.24368400  | 0.78507400  | 0.25555300  |
| C  | 0.77195300  | -1.58474400 | 0.57601000  |
| C  | 1.53547600  | 1.00592600  | -0.16684900 |
| C  | 2.05280400  | -1.36743500 | 0.16155600  |
| H  | 0.46535500  | -2.57967000 | 0.87631100  |
| C  | 2.41281600  | -0.06670700 | -0.20615600 |
| H  | 1.87339100  | 1.99190300  | -0.45544100 |
| H  | 2.78665000  | -2.16047100 | 0.11298500  |
| H  | -2.11230800 | 0.04527300  | 1.55830200  |
| O  | -2.61501100 | 0.03561500  | -1.16061800 |
| Cl | -0.84364400 | 2.09085900  | 0.32524800  |
| F  | 3.63725200  | 0.14946600  | -0.60825800 |

### frag-2 (1c and 1f)

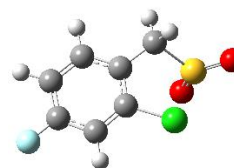

1 1

|    |             |             |             |
|----|-------------|-------------|-------------|
| S  | -2.23330700 | 0.29683000  | 0.27913000  |
| C  | -1.06264300 | 1.19625400  | -0.80592500 |
| H  | -1.27520100 | 2.25178500  | -0.61721600 |
| C  | 0.31670000  | 0.78270600  | -0.46466000 |
| C  | 0.60384100  | -0.56674800 | -0.27690000 |
| C  | 1.35575600  | 1.69542300  | -0.30738800 |
| C  | 1.85399500  | -1.04278500 | 0.03750400  |
| C  | 2.63577100  | 1.25860400  | -0.02283500 |
| H  | 1.16701400  | 2.75479000  | -0.42840400 |
| C  | 2.86415200  | -0.09768800 | 0.14097000  |
| H  | 2.06120700  | -2.09123400 | 0.20067300  |
| H  | 3.45782600  | 1.95346100  | 0.08356000  |
| H  | -1.42129500 | 0.90279400  | -1.79536900 |
| O  | -3.47514000 | -0.01920100 | -0.32162200 |
| Cl | -0.76233400 | -1.66245800 | -0.36710000 |
| F  | 4.08159900  | -0.51642100 | 0.42198300  |
| O  | -1.95445500 | 0.39846300  | 1.66274000  |

### Conformer A (1d)

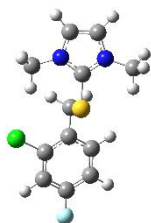

1 1

|    |             |             |             |
|----|-------------|-------------|-------------|
| S  | 0.86877200  | -0.36844100 | 0.77325200  |
| Cl | -1.59213900 | 2.32832600  | 0.08223600  |
| F  | -5.51557100 | -0.76956600 | 0.32664500  |
| N  | 3.13003600  | 0.97147400  | -0.06777400 |
| N  | 3.42243100  | -1.16637600 | 0.11027000  |
| C  | 2.51068300  | -0.18421100 | 0.23580500  |
| C  | -2.30284600 | 0.75143900  | -0.08730600 |
| C  | -1.52746700 | -0.33112700 | -0.50646100 |
| C  | 4.43216300  | 0.71254700  | -0.39478600 |
| H  | 5.11837300  | 1.49091100  | -0.68011200 |
| C  | -3.64955100 | 0.61659100  | 0.19412700  |

|   |             |             |             |
|---|-------------|-------------|-------------|
| H | -4.24772300 | 1.45916600  | 0.51093400  |
| C | 4.61742700  | -0.62419800 | -0.27599500 |
| H | 5.49676900  | -1.22486800 | -0.43102200 |
| C | -4.22217700 | -0.63319700 | 0.05764500  |
| C | -0.07907700 | -0.19177700 | -0.82439700 |
| H | 0.15429700  | 0.78237000  | -1.24700800 |
| H | 0.25452300  | -0.98298200 | -1.49138200 |
| C | 2.52622300  | 2.29584000  | -0.03894900 |
| H | 2.36090300  | 2.65133300  | -1.05479800 |
| H | 3.19344200  | 2.97673200  | 0.48475700  |
| H | 1.57886400  | 2.23360100  | 0.49063900  |
| C | -2.15478800 | -1.57058000 | -0.62572300 |
| H | -1.57351800 | -2.42452300 | -0.95312300 |
| C | -3.49808900 | -1.73771400 | -0.35012800 |
| H | -3.98674700 | -2.69703600 | -0.45007000 |
| C | 3.20479900  | -2.58273600 | 0.36852000  |
| H | 2.14837400  | -2.74075900 | 0.56446700  |
| H | 3.78452900  | -2.88801400 | 1.23781700  |
| H | 3.51299800  | -3.15726400 | -0.50253300 |

### Conformer B (1d)

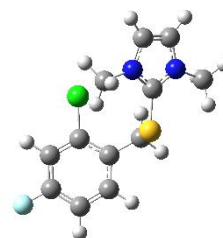

1 1

|    |             |             |             |
|----|-------------|-------------|-------------|
| S  | 0.92535100  | -1.10620600 | 1.10527100  |
| Cl | -0.56585600 | 1.48508100  | -1.20661800 |
| F  | -5.29584100 | 0.67787500  | 0.22982300  |
| N  | 2.56902200  | 1.05373600  | 0.73535600  |
| N  | 3.18313600  | -0.66874200 | -0.42540600 |
| C  | 2.24515700  | -0.21408500 | 0.42642500  |
| C  | -1.81472300 | 0.45595000  | -0.56063600 |
| C  | -1.52232400 | -0.86342000 | -0.21517200 |
| C  | 3.71390600  | 1.39897200  | 0.07073200  |
| H  | 4.16492800  | 2.37049700  | 0.17292300  |

|   |             |             |             |
|---|-------------|-------------|-------------|
| C | -3.08134200 | 0.98823600  | -0.41960800 |
| H | -3.30286600 | 2.00830800  | -0.69989300 |
| C | 4.09149900  | 0.32668800  | -0.66512500 |
| H | 4.92595400  | 0.19390800  | -1.33136100 |
| C | -4.07544100 | 0.17307700  | 0.08915900  |
| C | -0.16552400 | -1.44883300 | -0.38101800 |
| H | 0.35272600  | -1.05441000 | -1.25114100 |
| H | -0.21342400 | -2.53308900 | -0.45063800 |
| C | 1.84593700  | 1.92656000  | 1.64908200  |
| H | 1.84236600  | 2.93355300  | 1.23957100  |
| H | 2.32934000  | 1.92357300  | 2.62493100  |
| H | 0.82592100  | 1.56633000  | 1.74321700  |
| C | -2.56262500 | -1.64243100 | 0.28929700  |
| H | -2.36549400 | -2.67396000 | 0.55685300  |
| C | -3.84074900 | -1.14004200 | 0.44806800  |
| H | -4.64776300 | -1.74682000 | 0.83505500  |
| C | 3.24817900  | -2.01026900 | -0.98254900 |
| H | 2.73216600  | -2.69149100 | -0.30998600 |
| H | 4.29178000  | -2.30394700 | -1.06400100 |
| H | 2.78404800  | -2.03778300 | -1.96736500 |

### Conformer C (1d)

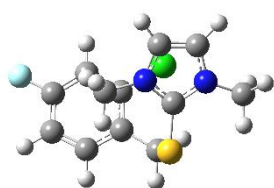

1 1

|    |             |             |             |
|----|-------------|-------------|-------------|
| S  | 1.38122300  | -1.93997800 | 0.37911400  |
| Cl | -0.09670600 | 1.06135300  | -1.94928900 |
| F  | -4.46747300 | 1.13475700  | 0.48485500  |
| N  | 1.34484500  | 0.58515100  | 1.48591700  |
| N  | 2.81826000  | 0.36193900  | -0.08521500 |
| C  | 1.83625000  | -0.27655900 | 0.57705400  |
| C  | -1.30248700 | 0.28392600  | -0.96029800 |
| C  | -1.14084400 | -1.03860100 | -0.54785100 |

|   |             |             |             |
|---|-------------|-------------|-------------|
| C | 2.00809400  | 1.77420600  | 1.37981800  |
| H | 1.78142000  | 2.61605100  | 2.01054800  |
| C | -2.42027400 | 1.02762700  | -0.62032200 |
| H | -2.54505400 | 2.04667000  | -0.95881100 |
| C | 2.92951800  | 1.63446300  | 0.39493300  |
| H | 3.65059900  | 2.33354500  | 0.00852100  |
| C | -3.39342000 | 0.42660500  | 0.15349100  |
| C | 0.04627000  | -1.85677300 | -0.91626800 |
| H | 0.50591400  | -1.53753800 | -1.84736200 |
| H | -0.21359400 | -2.91205500 | -1.00657800 |
| C | 0.28210900  | 0.31888200  | 2.44526300  |
| H | -0.62070700 | 0.84920300  | 2.14773200  |
| H | 0.60476600  | 0.65122600  | 3.42956700  |
| H | 0.08902400  | -0.74923300 | 2.46245900  |
| C | -2.16007000 | -1.59759500 | 0.22546400  |
| H | -2.06619200 | -2.62846100 | 0.54694500  |
| C | -3.28616600 | -0.88316100 | 0.58508000  |
| H | -4.07773700 | -1.32437100 | 1.17533400  |
| C | 3.61299000  | -0.18452600 | -1.17440300 |
| H | 3.54558800  | -1.26835700 | -1.14758500 |
| H | 4.64840700  | 0.12044500  | -1.04266100 |
| H | 3.23570700  | 0.18610800  | -2.12639200 |

### Conformer D (1d)

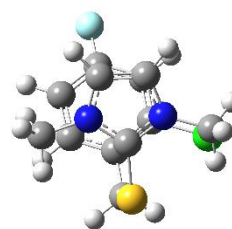

1 1

|    |             |             |             |
|----|-------------|-------------|-------------|
| S  | 1.86252600  | -0.41484700 | 1.61003600  |
| Cl | -0.66181300 | -2.59839300 | -0.22696000 |
| F  | -3.99904000 | 0.95893200  | -1.35007100 |
| N  | 1.57333400  | 1.65954100  | -0.19018800 |
| N  | 2.10473100  | -0.22366200 | -1.11747700 |
| C  | 1.80072400  | 0.35569400  | 0.05998200  |
| C  | -1.39566100 | -1.05223400 | 0.06568000  |

|   |             |             |             |
|---|-------------|-------------|-------------|
| C | -0.98754400 | -0.27590000 | 1.15283200  |
| C | 1.71130700  | 1.89230300  | -1.52892900 |
| H | 1.56399600  | 2.86703800  | -1.96046400 |
| C | -2.40799400 | -0.64603300 | -0.78555700 |
| H | -2.72674300 | -1.25991100 | -1.61630900 |
| C | 2.05104800  | 0.71517000  | -2.10785100 |
| H | 2.26273100  | 0.47692800  | -3.13569200 |
| C | -3.02784700 | 0.56278200  | -0.53517800 |
| C | 0.06605700  | -0.71623900 | 2.10237400  |
| H | 0.03806200  | -1.79061700 | 2.27153300  |
| H | -0.02982000 | -0.19964500 | 3.05421500  |
| C | 1.29468000  | 2.69074800  | 0.79661600  |
| H | 0.25877700  | 3.01213500  | 0.71471000  |
| H | 1.96071500  | 3.53312100  | 0.62139700  |
| H | 1.48134700  | 2.28147400  | 1.78562200  |
| C | -1.66389000 | 0.92531800  | 1.37058400  |
| H | -1.40193600 | 1.52165800  | 2.23696400  |
| C | -2.68090300 | 1.35886100  | 0.54026100  |
| H | -3.21557300 | 2.28092400  | 0.72421100  |
| C | 2.51600800  | -1.60534100 | -1.32605000 |
| H | 2.39281000  | -2.14948300 | -0.39551100 |
| H | 3.56157800  | -1.62475000 | -1.62918800 |
| H | 1.89344800  | -2.05096100 | -2.09802100 |

### Conformer E (1d)

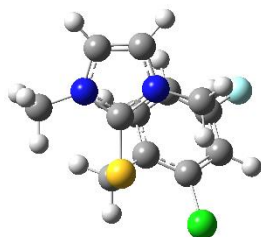

1 1

|    |             |             |             |
|----|-------------|-------------|-------------|
| S  | 1.34450900  | -1.71847400 | -0.12907700 |
| Cl | -2.18330400 | -2.31521100 | -0.66420900 |
| F  | -3.86947900 | 2.34027200  | 0.08893400  |
| N  | 3.11012700  | 0.35087500  | 0.32461700  |
| N  | 1.62619300  | 0.81115800  | -1.18356800 |
| C  | 2.02606800  | -0.13250300 | -0.31246000 |

|   |             |             |             |
|---|-------------|-------------|-------------|
| C | -2.04986700 | -0.74626100 | 0.05858800  |
| C | -0.97102300 | -0.44940900 | 0.89583100  |
| C | 3.38403700  | 1.60533000  | -0.14274300 |
| H | 4.21362900  | 2.18597300  | 0.22177000  |
| C | -3.03366100 | 0.18639900  | -0.21789900 |
| H | -3.87247200 | -0.05249100 | -0.85680000 |
| C | 2.45430700  | 1.89323200  | -1.08629800 |
| H | 2.32316800  | 2.77234400  | -1.69294900 |
| C | -2.92821900 | 1.44033300  | 0.35423900  |
| C | 0.08616700  | -1.44483000 | 1.21553200  |
| H | -0.31257000 | -2.45287600 | 1.33449800  |
| H | 0.62481200  | -1.17971500 | 2.12253300  |
| C | 3.89452100  | -0.34435700 | 1.33508900  |
| H | 3.78081300  | 0.15383700  | 2.29640100  |
| H | 4.94158900  | -0.33995200 | 1.03969500  |
| H | 3.54125400  | -1.36931700 | 1.40292200  |
| C | -0.91862100 | 0.82680400  | 1.45429700  |
| H | -0.10872900 | 1.07069700  | 2.13254700  |
| C | -1.88438800 | 1.78297400  | 1.19274300  |
| H | -1.85052000 | 2.76749400  | 1.63904500  |
| C | 0.49550400  | 0.71915400  | -2.09780500 |
| H | 0.17862900  | -0.31789100 | -2.15738100 |
| H | 0.81061000  | 1.06532700  | -3.07968500 |
| H | -0.32406100 | 1.33286900  | -1.72825400 |

### Conformer F (1d)

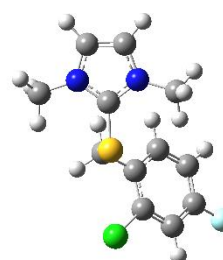

1 1

|    |             |             |             |
|----|-------------|-------------|-------------|
| S  | 0.99324500  | -0.90144800 | -0.66707100 |
| Cl | -2.03682200 | -2.32669700 | -0.76881800 |
| F  | -5.00463300 | 1.63065800  | 0.06192100  |
| N  | 3.40613300  | -0.37387200 | 0.56477600  |
| N  | 2.73921000  | 1.22056500  | -0.74019500 |

|   |             |             |             |
|---|-------------|-------------|-------------|
| C | 2.40191900  | 0.01570000  | -0.24371000 |
| C | -2.34990800 | -0.76432700 | -0.08105500 |
| C | -1.35042700 | -0.12783000 | 0.65572500  |
| C | 4.37111700  | 0.59554600  | 0.58386700  |
| H | 5.26701600  | 0.50271900  | 1.17274400  |
| C | -3.58629900 | -0.18394200 | -0.28964800 |
| H | -4.35713800 | -0.68324700 | -0.85962200 |
| C | 3.95836400  | 1.58842900  | -0.24006400 |
| H | 4.43256500  | 2.51634900  | -0.50853200 |
| C | -3.81829700 | 1.06444700  | 0.25624700  |
| C | -0.03283800 | -0.77357700 | 0.90058400  |
| H | -0.13705000 | -1.80163200 | 1.24217800  |
| H | 0.55169000  | -0.21168200 | 1.62468700  |
| C | 3.47252800  | -1.63284500 | 1.29115200  |
| H | 3.14389100  | -1.49428700 | 2.32016800  |
| H | 4.49968500  | -1.98911200 | 1.28061800  |
| H | 2.83098700  | -2.35512500 | 0.79237400  |
| C | -1.63477300 | 1.13027300  | 1.18217600  |
| H | -0.88068300 | 1.63990900  | 1.77088600  |
| C | -2.86305000 | 1.73756000  | 0.99368500  |
| H | -3.09025300 | 2.70859000  | 1.41175000  |
| C | 1.96272800  | 2.00779000  | -1.68831500 |
| H | 0.95905500  | 1.59648600  | -1.74253900 |
| H | 2.42862200  | 1.96336500  | -2.67140500 |
| H | 1.92357200  | 3.03857400  | -1.34348900 |

### Conformer G (1d)

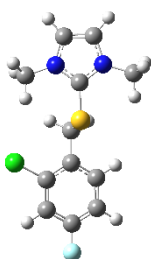

1 1

|    |             |             |             |
|----|-------------|-------------|-------------|
| S  | 0.86882200  | 0.36853800  | -0.77324600 |
| Cl | -1.59234000 | -2.32840500 | -0.08235300 |
| F  | -5.51551900 | 0.76980400  | -0.32667900 |
| N  | 3.13000300  | -0.97148100 | 0.06784700  |

|   |             |             |             |
|---|-------------|-------------|-------------|
| N | 3.42252100  | 1.16634300  | -0.11032600 |
| C | 2.51070400  | 0.18421900  | -0.23580800 |
| C | -2.30292600 | -0.75146800 | 0.08725600  |
| C | -1.52746700 | 0.33101400  | 0.50651000  |
| C | 4.43214200  | -0.71260600 | 0.39484000  |
| H | 5.11832700  | -1.49097600 | 0.68021400  |
| C | -3.64960400 | -0.61648800 | -0.19418800 |
| H | -4.24784400 | -1.45898800 | -0.51107300 |
| C | 4.61747700  | 0.62412500  | 0.27597900  |
| H | 5.49686200  | 1.22474400  | 0.43097100  |
| C | -4.22215000 | 0.63333800  | -0.05761100 |
| C | -0.07908100 | 0.19161300  | 0.82441800  |
| H | 0.15440100  | -0.78260100 | 1.24680900  |
| H | 0.25454300  | 0.98272700  | 1.49148900  |
| C | 2.52613500  | -2.29582300 | 0.03902600  |
| H | 2.36097500  | -2.65138900 | 1.05487700  |
| H | 3.19323000  | -2.97670100 | -0.48485800 |
| H | 1.57869000  | -2.23349800 | -0.49039900 |
| C | -2.15470500 | 1.57049400  | 0.62587700  |
| H | -1.57338200 | 2.42437400  | 0.95335100  |
| C | -3.49799900 | 1.73775900  | 0.35027400  |
| H | -3.98657700 | 2.69711300  | 0.45031000  |
| C | 3.20496800  | 2.58270000  | -0.36861700 |
| H | 2.14859600  | 2.74070500  | -0.56486800 |
| H | 3.78498100  | 2.88800900  | -1.23771200 |
| H | 3.51286800  | 3.15722400  | 0.50255500  |

### Conformer I (1e)

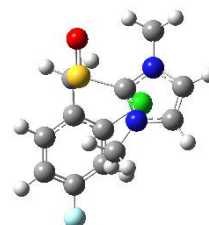

1 1

|    |             |             |             |
|----|-------------|-------------|-------------|
| S  | 1.28228900  | 1.72846200  | 0.44126700  |
| Cl | -0.35521000 | -1.28299400 | -1.90650300 |

|   |             |             |             |
|---|-------------|-------------|-------------|
| O | 2.50921900  | 2.41233200  | -0.02147300 |
| N | 2.62677000  | -0.69858500 | -0.12881100 |
| N | 1.20636100  | -0.85743700 | 1.49982800  |
| F | -4.69796900 | -0.80850700 | 0.52850500  |
| C | 1.67797400  | -0.04232600 | 0.54728400  |
| C | -1.17183900 | 0.96816600  | -0.59028400 |
| C | 0.09690000  | 1.64651500  | -0.97594400 |
| H | -0.05315500 | 2.70773000  | -1.18321700 |
| H | 0.61184300  | 1.19390400  | -1.81977900 |
| C | -2.12457700 | 1.65973300  | 0.16179500  |
| H | -1.92904400 | 2.69016300  | 0.43556100  |
| C | -1.46831000 | -0.34857600 | -0.94814100 |
| C | 3.38803700  | -0.20540300 | -1.27516300 |
| H | 2.84817800  | -0.43697400 | -2.19230600 |
| H | 4.35216800  | -0.70679300 | -1.28238700 |
| H | 3.52676100  | 0.86756500  | -1.17537400 |
| C | 2.73721000  | -1.96022600 | 0.38689700  |
| H | 3.44038600  | -2.67557400 | -0.00313100 |
| C | 1.84564100  | -2.06284700 | 1.40278000  |
| H | 1.62369200  | -2.88414000 | 2.06163600  |
| C | 0.16416500  | -0.54497600 | 2.47138800  |
| H | 0.20432400  | 0.51346800  | 2.71606900  |
| H | 0.34678300  | -1.12888400 | 3.36968600  |
| H | -0.81364100 | -0.78900900 | 2.06000500  |
| C | -2.65613800 | -0.95666900 | -0.57986900 |
| H | -2.88798200 | -1.96944100 | -0.87856300 |
| C | -3.31600400 | 1.07858200  | 0.55129300  |
| H | -4.05493500 | 1.62182100  | 1.12438700  |
| C | -3.55929000 | -0.22835100 | 0.17059900  |

### Conformer II (1e)

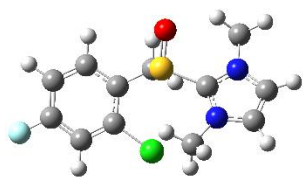

1 1

|   |            |            |            |
|---|------------|------------|------------|
| S | 0.83308800 | 0.96735900 | 0.89582400 |
|---|------------|------------|------------|

|    |             |             |             |
|----|-------------|-------------|-------------|
| Cl | -0.85055000 | -1.90065500 | -0.86787900 |
| O  | 1.34969900  | 2.33019700  | 1.17113300  |
| N  | 3.20022400  | 0.50804700  | -0.59280500 |
| N  | 2.62332400  | -1.17157200 | 0.64700700  |
| F  | -5.49174800 | -0.42601800 | 0.31503800  |
| C  | 2.24976200  | 0.04252500  | 0.22530900  |
| C  | -1.60766200 | 0.67027800  | -0.40026000 |
| C  | -0.20381100 | 1.08231300  | -0.66382000 |
| H  | -0.12333200 | 2.14525800  | -0.89170600 |
| H  | 0.26498100  | 0.49177400  | -1.44795800 |
| C  | -2.57359300 | 1.62151200  | -0.07259600 |
| H  | -2.28735500 | 2.66502500  | -0.01681800 |
| C  | -2.01173200 | -0.66256000 | -0.46580900 |
| C  | 3.20734100  | 1.80783100  | -1.26136300 |
| H  | 2.70111800  | 1.73142000  | -2.22237600 |
| H  | 4.24129300  | 2.10264900  | -1.41929400 |
| H  | 2.71365600  | 2.53501400  | -0.62113600 |
| C  | 4.18287700  | -0.43743600 | -0.70700300 |
| H  | 5.05616100  | -0.28284900 | -1.31690400 |
| C  | 3.82084800  | -1.49071800 | 0.06522700  |
| H  | 4.31703700  | -2.42723200 | 0.25206300  |
| C  | 1.90491100  | -2.03516400 | 1.57861700  |
| H  | 1.15361800  | -1.45217400 | 2.10323700  |
| H  | 2.61604400  | -2.43926200 | 2.29525100  |
| H  | 1.42018700  | -2.84228100 | 1.03381600  |
| C  | -3.31657200 | -1.04893300 | -0.23130300 |
| H  | -3.62382500 | -2.08323700 | -0.29364100 |
| C  | -3.88738300 | 1.26910800  | 0.17279800  |
| H  | -4.63759000 | 2.00723100  | 0.42099000  |
| C  | -4.23477700 | -0.06553600 | 0.08710200  |

### Conformer III (1e)

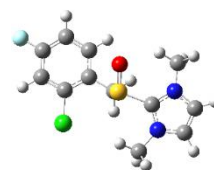

1 1

|    |             |             |             |     |             |             |             |
|----|-------------|-------------|-------------|-----|-------------|-------------|-------------|
| S  | 0.81631400  | 0.04710100  | 0.81437500  | I 1 |             |             |             |
| Cl | -1.71810700 | -2.45367700 | -0.12659000 | S   | 1.00236300  | -1.09067300 | 0.53516700  |
| O  | 0.56684000  | 1.34648400  | 1.47481600  | Cl  | -2.20195400 | -2.45644400 | 0.34137000  |
| N  | 3.24439500  | 1.16084700  | -0.16999900 | O   | 0.27622600  | -0.51422300 | 1.68541400  |
| N  | 3.26583600  | -0.99928300 | -0.00716100 | N   | 2.46915500  | 1.35401900  | 0.51060600  |
| F  | -5.52721000 | 0.77890000  | 0.22511200  | N   | 3.48765200  | -0.30220300 | -0.44467600 |
| C  | 2.49767400  | 0.09089000  | 0.12273200  | F   | -4.81842000 | 1.80390400  | 0.03508200  |
| C  | -1.54004500 | 0.23315100  | -0.53038500 | C   | 2.34081000  | 0.07691800  | 0.13735800  |
| C  | -0.09138500 | 0.04965400  | -0.80889700 | C   | -1.29987700 | -0.14014400 | -0.74721500 |
| H  | 0.30916200  | 0.87564800  | -1.39473500 | C   | -0.03210800 | -0.84224100 | -1.04514900 |
| H  | 0.14287300  | -0.90251200 | -1.28574000 | H   | 0.58002000  | -0.30646900 | -1.76751500 |
| C  | -2.10871100 | 1.50503500  | -0.56858100 | H   | -0.18778400 | -1.86643700 | -1.38141400 |
| H  | -1.48193900 | 2.35577800  | -0.80436300 | C   | -1.47879000 | 1.19384800  | -1.10997700 |
| C  | -2.37046000 | -0.84344200 | -0.21108700 | H   | -0.68039800 | 1.71085200  | -1.63025400 |
| C  | 2.81893100  | 2.56082200  | -0.16635600 | C   | -2.35973700 | -0.79211500 | -0.11136700 |
| H  | 2.57088500  | 2.86643700  | -1.18173000 | C   | 1.47478000  | 2.19352600  | 1.18263900  |
| H  | 3.64190500  | 3.16594500  | 0.20568600  | H   | 1.09148200  | 2.92597400  | 0.47496300  |
| H  | 1.95660300  | 2.66605000  | 0.48612500  | H   | 1.96093000  | 2.70168200  | 2.01243600  |
| C  | 4.50420700  | 0.73782900  | -0.50520600 | H   | 0.67154300  | 1.56489100  | 1.55351300  |
| H  | 5.28350500  | 1.42914000  | -0.77592900 | C   | 3.71565900  | 1.79429100  | 0.14559000  |
| C  | 4.51699700  | -0.61291100 | -0.40932900 | H   | 4.04573900  | 2.79828900  | 0.34946900  |
| H  | 5.30693700  | -1.32217400 | -0.58584600 | C   | 4.35082500  | 0.76205700  | -0.45690000 |
| C  | 2.85119600  | -2.37956800 | 0.21926400  | H   | 5.33735000  | 0.69521100  | -0.88172300 |
| H  | 2.00493300  | -2.39388100 | 0.90220700  | C   | 3.78144300  | -1.62230600 | -0.99021700 |
| H  | 3.68021700  | -2.92299500 | 0.66546700  | H   | 3.21967600  | -2.37325100 | -0.43883600 |
| H  | 2.57079500  | -2.84544800 | -0.72402000 | H   | 4.84421600  | -1.81712500 | -0.87267400 |
| C  | -3.71756900 | -0.67371000 | 0.04214200  | H   | 3.51695700  | -1.66269100 | -2.04578300 |
| H  | -4.35897100 | -1.51016500 | 0.28086500  | C   | -3.55163900 | -0.14648500 | 0.15669700  |
| C  | -3.45182100 | 1.70692800  | -0.31738000 | H   | -4.37088500 | -0.65385100 | 0.64619800  |
| H  | -3.89660100 | 2.69177500  | -0.35164300 | C   | -2.65970500 | 1.86493900  | -0.85696000 |
| C  | -4.23317100 | 0.60738400  | -0.01670400 | H   | -2.80886600 | 2.89435300  | -1.15243900 |
|    |             |             |             | C   | -3.67603500 | 1.17684900  | -0.21991200 |

**Conformer IV (1e)**

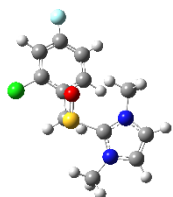



### Conformer V (1e)

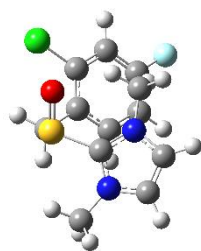

I 1

|    |             |             |             |
|----|-------------|-------------|-------------|
| S  | 1.36550800  | -1.69754300 | -0.04799200 |
| Cl | -2.50522000 | -2.24469700 | 0.29840700  |
| O  | 0.78762100  | -2.14689800 | 1.23373600  |
| N  | 1.57814700  | 0.86419300  | 1.16219300  |
| N  | 3.01809400  | 0.51624900  | -0.41937700 |
| F  | -3.70398200 | 2.60252700  | 0.03561300  |
| C  | 1.94410400  | 0.00780400  | 0.20344000  |
| C  | -0.99100700 | -0.32592400 | -0.90790000 |
| C  | 0.00990100  | -1.36312200 | -1.26794200 |
| H  | 0.54366500  | -1.12055200 | -2.19003800 |
| H  | -0.42262200 | -2.35961300 | -1.37546900 |
| C  | -0.80221400 | 0.99447100  | -1.31863500 |
| H  | 0.06493200  | 1.23940800  | -1.92205800 |
| C  | -2.15281900 | -0.62407500 | -0.18725100 |
| C  | 0.44972000  | 0.73413200  | 2.08542400  |
| H  | -0.41949200 | 1.23011700  | 1.65712600  |
| H  | 0.72726700  | 1.20931200  | 3.02291600  |
| H  | 0.24219300  | -0.31980200 | 2.24522500  |
| C  | 2.42022500  | 1.94276400  | 1.13043800  |
| H  | 2.31597500  | 2.76550100  | 1.81644900  |
| C  | 3.31846500  | 1.72955000  | 0.13866000  |
| H  | 4.14264800  | 2.33055200  | -0.20444200 |
| C  | 3.75401000  | -0.10172100 | -1.51577900 |
| H  | 3.66251400  | -1.18342200 | -1.44681900 |
| H  | 4.80221600  | 0.17215100  | -1.42810900 |
| H  | 3.36590400  | 0.24277100  | -2.47318200 |
| C  | -3.07204600 | 0.36182700  | 0.13413700  |
| H  | -3.97345800 | 0.12790300  | 0.68323800  |
| C  | -1.70180900 | 1.99718900  | -1.00882100 |

H -1.56203600 3.01630900 -1.34262000

C -2.82451700 1.65697900 -0.27533300

### Conformer VI (1e)

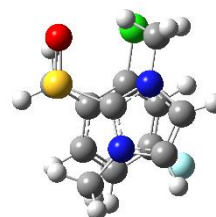

I 1

|    |             |             |             |
|----|-------------|-------------|-------------|
| S  | 1.88726300  | -0.28739000 | -1.45606600 |
| Cl | -0.58490900 | -2.49815500 | 0.66782700  |
| O  | 2.71547200  | -1.46436000 | -1.11861700 |
| N  | 1.86289600  | 0.22002200  | 1.34952400  |
| N  | 1.26044500  | 1.90963000  | 0.13520200  |
| F  | -4.35293000 | 0.78113100  | 0.95887100  |
| C  | 1.57946700  | 0.60743500  | 0.10104600  |
| C  | -1.01788100 | -0.46480900 | -1.08752500 |
| C  | 0.15587400  | -0.91487100 | -1.87662400 |
| H  | 0.06059800  | -0.64021200 | -2.92670900 |
| H  | 0.33718100  | -1.98854200 | -1.80414900 |
| C  | -1.79860700 | 0.59787100  | -1.54904600 |
| H  | -1.53192700 | 1.07298400  | -2.48642200 |
| C  | -1.43981600 | -1.10878300 | 0.07926400  |
| C  | 2.33637000  | -1.08501500 | 1.81984000  |
| H  | 1.58034200  | -1.51803400 | 2.46996500  |
| H  | 3.26156800  | -0.92882600 | 2.37104500  |
| H  | 2.51835000  | -1.72984000 | 0.96827900  |
| C  | 1.68901000  | 1.28945100  | 2.18884200  |
| H  | 1.85789900  | 1.21004600  | 3.24883800  |
| C  | 1.30756500  | 2.34421900  | 1.43250100  |
| H  | 1.07472200  | 3.35867000  | 1.70586800  |
| C  | 0.94580300  | 2.75784400  | -1.00648900 |
| H  | 1.39679600  | 2.33785800  | -1.90317500 |
| H  | 1.36829200  | 3.74426800  | -0.83091900 |
| H  | -0.13215500 | 2.83189300  | -1.13148300 |
| C  | -2.56177800 | -0.69626900 | 0.77594800  |

|   |             |             |             |
|---|-------------|-------------|-------------|
| H | -2.88973300 | -1.20965600 | 1.66901600  |
| C | -2.92289000 | 1.03533000  | -0.87389800 |
| H | -3.53319900 | 1.84753900  | -1.24499900 |
| C | -3.27849500 | 0.38024200  | 0.29028400  |

### Conformer VII (1e)

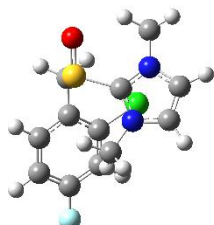

1 1

|    |             |             |             |
|----|-------------|-------------|-------------|
| S  | 1.28228500  | -1.72845100 | -0.44117400 |
| Cl | -0.35539300 | 1.28292900  | 1.90669000  |
| O  | 2.50918200  | -2.41231800 | 0.02169400  |
| N  | 2.62686500  | 0.69855500  | 0.12879800  |
| N  | 1.20659000  | 0.85735100  | -1.49996400 |
| F  | -4.69803900 | 0.80849900  | -0.52859100 |
| C  | 1.67800000  | 0.04232100  | -0.54721900 |
| C  | -1.17189400 | -0.96810400 | 0.59022900  |
| C  | 0.09683700  | -1.64643700 | 0.97593700  |
| H  | -0.05319800 | -2.70763400 | 1.18337400  |
| H  | 0.61180100  | -1.19377000 | 1.81972800  |
| C  | -2.12449900 | -1.65961400 | -0.16207500 |
| H  | -1.92889800 | -2.69000000 | -0.43596300 |
| C  | -1.46845900 | 0.34857200  | 0.94823200  |
| C  | 3.38776500  | 0.20554500  | 1.27547000  |
| H  | 2.84781400  | 0.43766300  | 2.19241600  |
| H  | 4.35209000  | 0.70657200  | 1.28266200  |
| H  | 3.52619700  | -0.86750400 | 1.17608700  |
| C  | 2.73749400  | 1.96010300  | -0.38709800 |
| H  | 3.44076300  | 2.67540800  | 0.00283700  |
| C  | 1.84603600  | 2.06267400  | -1.40308300 |
| H  | 1.62424200  | 2.88389600  | -2.06208300 |
| C  | 0.16429300  | 0.54493300  | -2.47141000 |
| H  | 0.20427500  | -0.51355200 | -2.71596100 |
| H  | 0.34693800  | 1.12870000  | -3.36979400 |

|   |             |             |             |
|---|-------------|-------------|-------------|
| H | -0.81344600 | 0.78915200  | -2.05998000 |
| C | -2.65630300 | 0.95664800  | 0.57997400  |
| H | -2.88823500 | 1.96935400  | 0.87881700  |
| C | -3.31590300 | -1.07845200 | -0.55163000 |
| H | -4.05472400 | -1.62161400 | -1.12493800 |
| C | -3.55933400 | 0.22838600  | -0.17069700 |

### Conformer 1 (1f)

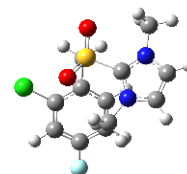

1 1

|    |             |             |             |
|----|-------------|-------------|-------------|
| S  | -1.15885500 | -1.35433500 | 0.19726400  |
| Cl | 2.52267900  | -2.32244900 | 0.40813800  |
| O  | -0.52661900 | -1.43108700 | 1.48098500  |
| O  | -2.16637700 | -2.28642500 | -0.22384400 |
| N  | -1.69774000 | 1.28536500  | 1.01873100  |
| N  | -3.08616200 | 0.57588700  | -0.49393400 |
| F  | 4.23617100  | 2.34818200  | -0.09993600 |
| C  | 1.19362700  | -0.29620400 | -0.83294300 |
| C  | -1.98925100 | 0.25726400  | 0.20965700  |
| C  | 0.07068900  | -1.23187500 | -1.11648000 |
| H  | 0.38992100  | -2.27332500 | -1.21302200 |
| H  | -0.48822900 | -0.96544600 | -2.01415300 |
| C  | -0.60560700 | 1.38593700  | 1.99145100  |
| H  | -0.79539800 | 0.71580200  | 2.82491400  |
| H  | -0.57119100 | 2.41648900  | 2.33284500  |
| H  | 0.33495600  | 1.12305300  | 1.51702700  |
| C  | -3.49009200 | 1.82538800  | -0.12532900 |
| H  | -4.35693200 | 2.29636200  | -0.55534700 |
| C  | -2.62165400 | 2.26835200  | 0.82011800  |
| H  | -2.59300700 | 3.19710700  | 1.36289400  |
| C  | 2.33849200  | -0.69323800 | -0.13404000 |
| C  | 1.13237400  | 1.01848000  | -1.29552100 |
| H  | 0.27595500  | 1.33159100  | -1.88253200 |
| C  | 3.36836500  | 0.19774900  | 0.11674100  |

|   |             |             |             |
|---|-------------|-------------|-------------|
| H | 4.25649800  | -0.11015800 | 0.65071100  |
| C | 3.24893800  | 1.49483600  | -0.34325500 |
| C | 2.14694200  | 1.92731400  | -1.05778500 |
| H | 2.10717800  | 2.94190300  | -1.42977100 |
| C | -3.80235900 | -0.25350500 | -1.46614800 |
| H | -3.11323900 | -0.64534400 | -2.20830900 |
| H | -4.53932100 | 0.37845000  | -1.95323600 |
| H | -4.28810800 | -1.08077700 | -0.95666900 |

### Conformer 2 (1f)

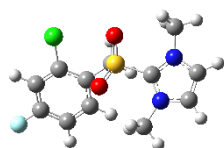

|     |             |             |             |
|-----|-------------|-------------|-------------|
| 1 1 |             |             |             |
| S   | -0.88447100 | -0.63646600 | 0.51133400  |
| Cl  | 2.16887600  | -2.38930200 | 0.33187700  |
| O   | -0.34760700 | 0.15333900  | 1.58172300  |
| O   | -1.28188000 | -2.00534500 | 0.68039000  |
| N   | -2.75873700 | 1.47020000  | 0.39503400  |
| N   | -3.46997500 | -0.34183300 | -0.56702100 |
| F   | 5.28420000  | 1.52006600  | 0.02536900  |
| C   | 1.53344800  | 0.04273900  | -0.68604200 |
| C   | -2.42708200 | 0.21377000  | 0.06609200  |
| C   | 0.17153100  | -0.48080400 | -0.97944300 |
| H   | 0.17571600  | -1.49325600 | -1.38447400 |
| H   | -0.36712600 | 0.18124800  | -1.65876800 |
| C   | -1.96098500 | 2.45262400  | 1.13512000  |
| H   | -1.91329900 | 2.17136300  | 2.18357400  |
| H   | -2.44954500 | 3.41636500  | 1.02332400  |
| H   | -0.95402700 | 2.49847700  | 0.73394800  |
| C   | -4.47612300 | 0.57739800  | -0.63785900 |
| H   | -5.42073600 | 0.35664200  | -1.10374000 |
| C   | -4.03213000 | 1.70945600  | -0.03519100 |
| H   | -4.52015600 | 2.65536400  | 0.12330600  |
| C   | 2.52127800  | -0.75244900 | -0.10174700 |
| C   | 1.86309600  | 1.35405700  | -1.02273200 |
| H   | 1.11888700  | 1.98201300  | -1.49936400 |

|   |             |             |             |
|---|-------------|-------------|-------------|
| C | 3.79099300  | -0.26277100 | 0.14075700  |
| H | 4.55527500  | -0.87998700 | 0.59146200  |
| C | 4.06635200  | 1.04551200  | -0.20686500 |
| C | 3.12329000  | 1.87039600  | -0.79090700 |
| H | 3.38536800  | 2.88398800  | -1.06095000 |
| C | -3.57722600 | -1.70730900 | -1.08703300 |
| H | -2.76288600 | -1.91097200 | -1.77701100 |
| H | -4.52345500 | -1.78151900 | -1.61488900 |
| H | -3.54293600 | -2.41694600 | -0.26587800 |

### Conformer 3 (1f)

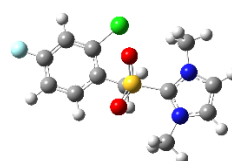

|     |             |             |             |
|-----|-------------|-------------|-------------|
| 1 1 |             |             |             |
| S   | -0.79672700 | 0.50283100  | 0.59431700  |
| Cl  | 1.71576600  | -2.39787100 | -0.47689300 |
| O   | -0.82449300 | 1.90526700  | 0.90277500  |
| O   | -0.47991400 | -0.49393900 | 1.57489400  |
| N   | -3.42490800 | 0.97555900  | -0.31943500 |
| N   | -3.03392400 | -1.11917000 | 0.10051500  |
| F   | 5.60444800  | 0.63081300  | 0.36048700  |
| C   | 1.63072700  | 0.33096700  | -0.56583800 |
| C   | -2.48687800 | 0.10435500  | 0.07874600  |
| C   | 0.17878100  | 0.24263900  | -0.90215400 |
| H   | -0.09773300 | -0.73629700 | -1.29255800 |
| H   | -0.13700800 | 1.02530100  | -1.59231300 |
| C   | -3.30306500 | 2.42888600  | -0.46187500 |
| H   | -3.16682400 | 2.88449700  | 0.51455000  |
| H   | -4.21892200 | 2.78731200  | -0.92270500 |
| H   | -2.45578900 | 2.67470800  | -1.09450800 |
| C   | -4.33784200 | -1.01908600 | -0.28746200 |
| H   | -4.98511100 | -1.87698100 | -0.34419900 |
| C   | -4.58252400 | 0.29038000  | -0.54937800 |
| H   | -5.48222900 | 0.78222000  | -0.87597700 |
| C   | 2.40524200  | -0.80894100 | -0.34163400 |
| C   | 2.24907500  | 1.57660400  | -0.46355300 |

|   |             |             |             |
|---|-------------|-------------|-------------|
| H | 1.66347400  | 2.47190000  | -0.63132400 |
| C | 3.74911100  | -0.71728900 | -0.03290000 |
| H | 4.35160000  | -1.59934500 | 0.13118700  |
| C | 4.31467300  | 0.53974500  | 0.06152800  |
| C | 3.58839700  | 1.69655400  | -0.15037900 |
| H | 4.07168000  | 2.66050900  | -0.07228800 |
| C | -2.40400400 | -2.37571200 | 0.51528100  |
| H | -1.40995700 | -2.45965500 | 0.08743200  |
| H | -3.02930300 | -3.18815300 | 0.15616100  |
| H | -2.32736700 | -2.40479300 | 1.59905700  |

### Conformer 4 (1f)

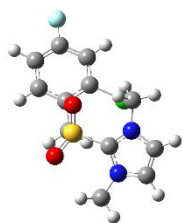

|     |             |             |             |
|-----|-------------|-------------|-------------|
| 1 1 |             |             |             |
| S   | -0.89523500 | 1.26647600  | 0.55818100  |
| Cl  | 0.73978600  | -1.81730800 | -1.14136500 |
| O   | -1.60626800 | 2.51458800  | 0.49745700  |
| O   | -0.24047300 | 0.80645400  | 1.74808700  |
| N   | -3.17243000 | 0.13364400  | -0.63936000 |
| N   | -2.30118400 | -1.15649100 | 0.87522900  |
| F   | 5.36892500  | -0.63232900 | 0.36148500  |
| C   | 1.59951000  | 0.69481600  | -0.53230800 |
| C   | -2.15972700 | 0.01002800  | 0.23144500  |
| C   | 0.24347500  | 1.20094700  | -0.87003800 |
| H   | -0.25547500 | 0.60883900  | -1.63737300 |
| H   | 0.26408400  | 2.24443500  | -1.18607600 |
| C   | -3.43031400 | 1.24780600  | -1.55230700 |
| H   | -3.36770800 | 2.18570300  | -1.00976200 |
| H   | -4.42847800 | 1.11695600  | -1.95951000 |
| H   | -2.70808400 | 1.23691200  | -2.36681500 |
| C   | -3.41720000 | -1.78010200 | 0.39803000  |
| H   | -3.73968300 | -2.73571800 | 0.77293000  |
| C   | -3.96064500 | -0.97615100 | -0.55059700 |

|   |             |             |             |
|---|-------------|-------------|-------------|
| H | -4.84019900 | -1.10347800 | -1.15736700 |
| C | 1.93476100  | -0.65453300 | -0.62760200 |
| C | 2.59063300  | 1.58143600  | -0.11516800 |
| H | 2.35577600  | 2.63597500  | -0.03387800 |
| C | 3.20198000  | -1.11765900 | -0.33385100 |
| H | 3.45997200  | -2.16360300 | -0.42027300 |
| C | 4.14862900  | -0.19684700 | 0.07544800  |
| C | 3.86675500  | 1.15098700  | 0.19194100  |
| H | 4.63750400  | 1.83816500  | 0.51258400  |
| C | -1.46222800 | -1.72032300 | 1.93740800  |
| H | -0.42888700 | -1.76051600 | 1.60877400  |
| H | -1.82768100 | -2.72399300 | 2.13436300  |
| H | -1.53861500 | -1.10891500 | 2.83148500  |

### Conformer 5 (1f)

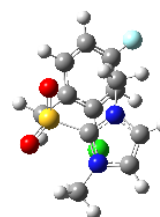

|     |             |             |             |
|-----|-------------|-------------|-------------|
| 1 1 |             |             |             |
| S   | -1.38176600 | 1.55046800  | -0.18781200 |
| Cl  | 0.44393300  | -1.63373800 | -1.80226700 |
| O   | -2.58963400 | 1.80856500  | -0.91944600 |
| O   | -0.96006200 | 2.38139900  | 0.90455800  |
| N   | -2.47219100 | -1.01976400 | 0.08460300  |
| N   | -1.09192000 | -0.52651700 | 1.68838400  |
| F   | 4.68640400  | -0.78621600 | 0.70911800  |
| C   | 1.21656300  | 0.78868600  | -0.80481800 |
| C   | -1.62079900 | -0.08763600 | 0.53719400  |
| C   | -0.02478200 | 1.39590000  | -1.36411600 |
| H   | -0.42916300 | 0.85520700  | -2.21792100 |
| H   | 0.11832600  | 2.44086700  | -1.65202300 |
| C   | -3.28614700 | -0.98156700 | -1.13187000 |
| H   | -4.02236000 | -0.18713200 | -1.05891800 |
| H   | -3.77624800 | -1.94631400 | -1.22445600 |
| H   | -2.65080300 | -0.81395600 | -1.99711400 |

|   |             |             |             |
|---|-------------|-------------|-------------|
| C | -1.60938900 | -1.75727200 | 1.96013600  |
| H | -1.33195300 | -2.31215200 | 2.83933400  |
| C | -2.47119200 | -2.06600100 | 0.95643300  |
| H | -3.07846700 | -2.94049700 | 0.80044300  |
| C | 1.52191600  | -0.56555000 | -0.94846700 |
| C | 2.13893000  | 1.59212800  | -0.13092900 |
| H | 1.92790100  | 2.64840900  | -0.01731200 |
| C | 2.69042300  | -1.10805100 | -0.44338600 |
| H | 2.92925300  | -2.15440500 | -0.57223700 |
| C | 3.56535200  | -0.27055000 | 0.22166200  |
| C | 3.31220300  | 1.07888500  | 0.38820400  |
| H | 4.02983300  | 1.70486600  | 0.90082600  |
| C | -0.14189900 | 0.16237800  | 2.56494500  |
| H | 0.71608200  | 0.49611200  | 1.98893000  |
| H | 0.17590000  | -0.54990400 | 3.32079300  |
| H | -0.62527500 | 1.01706400  | 3.02938500  |

### Conformer 6 (1f)

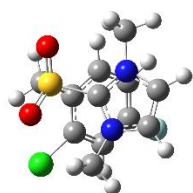

1 1

|    |             |             |             |
|----|-------------|-------------|-------------|
| S  | -1.70195000 | -1.00324500 | -0.80665400 |
| Cl | 1.74155700  | -2.48225700 | 0.54471700  |
| O  | -1.96836100 | -2.14823500 | 0.01631900  |
| O  | -2.63294900 | -0.53046100 | -1.79446600 |
| N  | -1.36072100 | 0.26734200  | 1.68657000  |
| N  | -1.88369400 | 1.65454900  | 0.10006500  |
| F  | 4.16822200  | 1.88857400  | 0.36484000  |
| C  | 1.05254500  | -0.37711000 | -1.04485400 |
| C  | -1.58330300 | 0.37490000  | 0.36909200  |
| C  | -0.06622000 | -1.18851800 | -1.60463100 |
| H  | 0.10838500  | -2.26184100 | -1.52815100 |
| H  | -0.27690700 | -0.92462400 | -2.64016800 |
| C  | -1.07798800 | -0.94233200 | 2.46402900  |
| H  | -1.98802000 | -1.52736100 | 2.56824500  |

|   |             |             |             |
|---|-------------|-------------|-------------|
| H | -0.71940900 | -0.62353600 | 3.43864200  |
| H | -0.31944200 | -1.53947000 | 1.97017000  |
| C | -1.83579900 | 2.36570100  | 1.26267600  |
| H | -2.04035300 | 3.42163800  | 1.29550600  |
| C | -1.50954200 | 1.49834400  | 2.25403400  |
| H | -1.37749000 | 1.65959600  | 3.30971600  |
| C | 1.92448300  | -0.86989000 | -0.06941200 |
| C | 1.30267700  | 0.90161100  | -1.54586900 |
| H | 0.68386900  | 1.27995200  | -2.35121300 |
| C | 2.97822600  | -0.11214000 | 0.41189700  |
| H | 3.65846000  | -0.50354800 | 1.15542800  |
| C | 3.16150700  | 1.15855000  | -0.09764900 |
| C | 2.34412200  | 1.68245200  | -1.08202800 |
| H | 2.54473600  | 2.66613700  | -1.48414100 |
| C | -2.27778200 | 2.24263800  | -1.18087400 |
| H | -1.61645900 | 1.90501500  | -1.97080600 |
| H | -2.20607000 | 3.32188200  | -1.07994400 |
| H | -3.29672000 | 1.95037900  | -1.42029800 |

### Conformer 7 (1f)

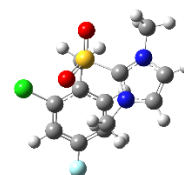

1 1

|    |             |             |             |
|----|-------------|-------------|-------------|
| S  | -1.15888600 | -1.35444000 | 0.19729500  |
| Cl | 2.52245200  | -2.32245800 | 0.40796600  |
| O  | -0.52669700 | -1.43137200 | 1.48102100  |
| O  | -2.16635100 | -2.28649200 | -0.22403000 |
| N  | -1.69801700 | 1.28513400  | 1.01918400  |
| N  | -3.08585300 | 0.57603000  | -0.49419700 |
| F  | 4.23639900  | 2.34803800  | -0.09991700 |
| C  | 1.19352100  | -0.29596800 | -0.83290100 |
| C  | -1.98931400 | 0.25716500  | 0.20986200  |
| C  | 0.07056100  | -1.23162000 | -1.11650000 |
| H  | 0.38988200  | -2.27300200 | -1.21336100 |
| H  | -0.48857000 | -0.96492900 | -2.01395900 |

|   |             |             |             |
|---|-------------|-------------|-------------|
| C | -0.60617300 | 1.38551100  | 1.99225100  |
| H | -0.79468600 | 0.71303400  | 2.82408700  |
| H | -0.57381900 | 2.41531300  | 2.33609300  |
| H | 0.33495600  | 1.12563900  | 1.51723900  |
| C | -3.48971400 | 1.82558400  | -0.12567700 |
| H | -4.35629200 | 2.29672100  | -0.55604100 |
| C | -2.62166500 | 2.26830900  | 0.82023400  |
| H | -2.59317200 | 3.19695400  | 1.36320600  |
| C | 2.33840600  | -0.69317600 | -0.13412300 |
| C | 1.13234600  | 1.01876000  | -1.29532400 |
| H | 0.27588400  | 1.33204400  | -1.88218100 |
| C | 3.36840800  | 0.19766100  | 0.11665800  |
| H | 4.25654200  | -0.11038300 | 0.65054600  |
| C | 3.24906500  | 1.49479700  | -0.34321700 |
| C | 2.14703400  | 1.92745600  | -1.05758200 |
| H | 2.10733400  | 2.94209200  | -1.42944500 |
| C | -3.80169000 | -0.25313300 | -1.46687200 |
| H | -3.11257200 | -0.64326600 | -2.20996600 |
| H | -4.53970500 | 0.37849900  | -1.95277200 |
| H | -4.28612300 | -1.08155600 | -0.95803100 |
